# Supplementary material for: Phylogeography and Ecological Niche Shape the Cichlid Fish Gut Microbiota in Central American and African Lakes
Source: PubMed Central journal article supplement (PMC6803461; doi:10.3389/fmicb.2019.02372), 2019-10-15
Supplement: Image_1.pdf [file Image_1.pdf]

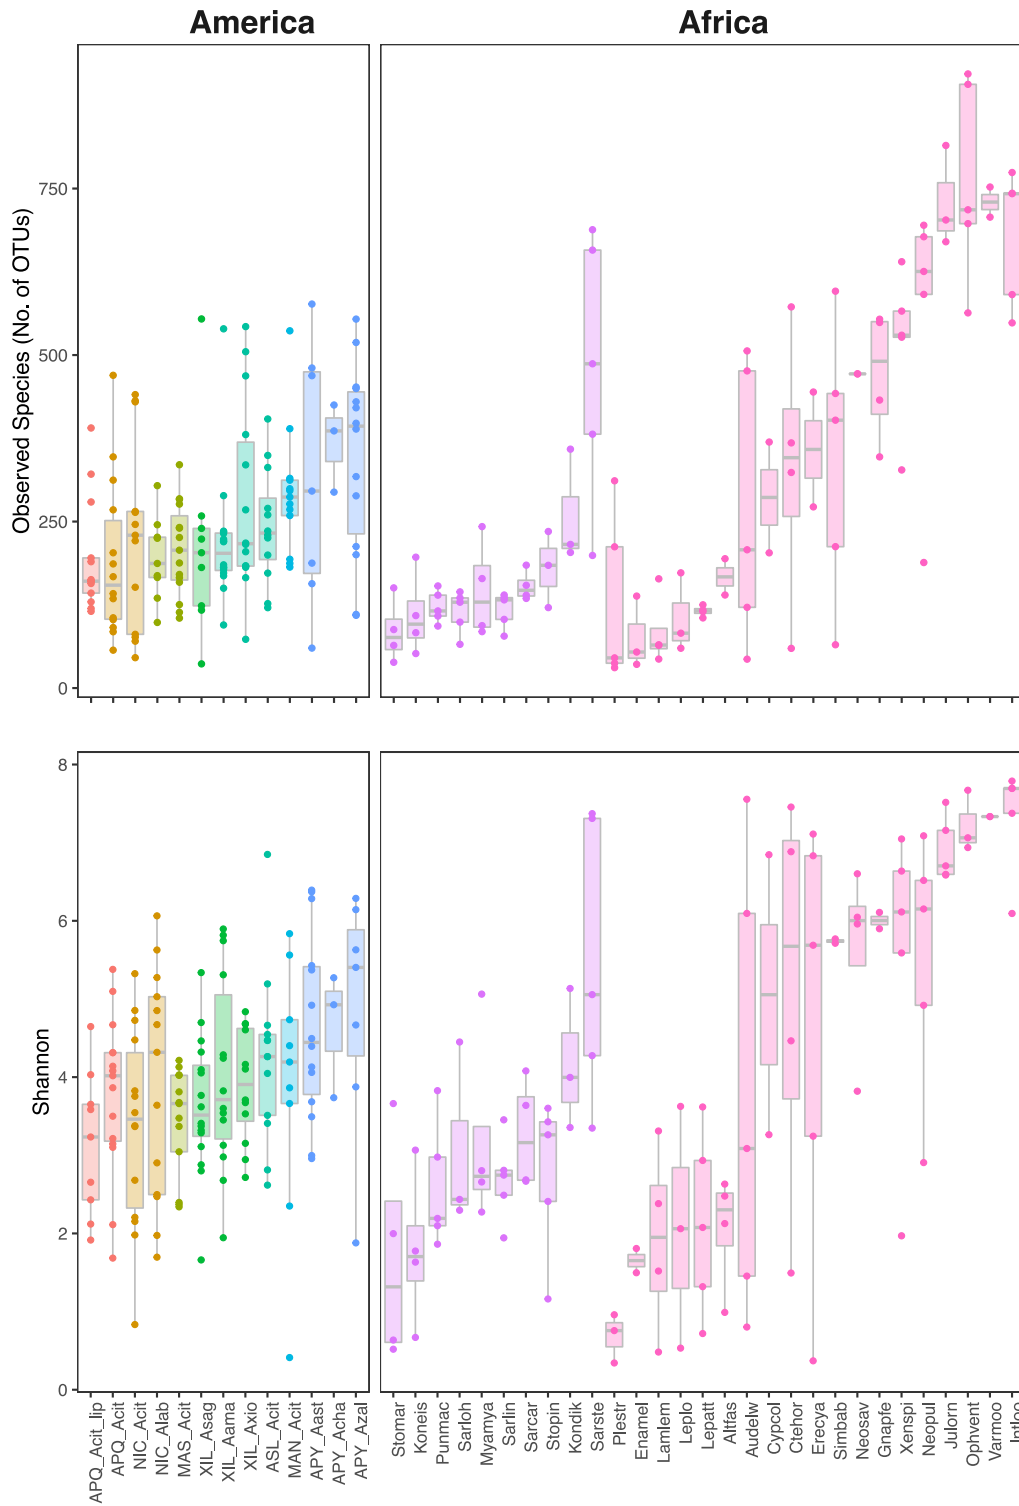

**Figure S1:** Microbiota alpha diversity by species based on Observed Species (Number of OTUs) and Shannon diversity.
