# Supplementary material for: Phylogeography and Ecological Niche Shape the Cichlid Fish Gut Microbiota in Central American and African Lakes
Source: Front Microbiol. 2019 Oct 15;10:2372. doi: 10.3389/fmicb.2019.02372 (PMC6803461; doi:10.3389/fmicb.2019.02372)
Supplement: TABLE S1 — Sample metadata. [file Table_1.XLSX]

## Sheet: Table_S1
Specimen_ID	Species	Continent	Lake	Location	Lake_Species_Code	Main_diet_category	Ecological_niche	Sampling_Date	SL (mm)	TL (mm)	IL (mm)	W (mg)	Sex	Gut_microbiota
F420	Amphilophus citrinellus	America	Apoyeque		APQ_Acit	O		2016-11-24	120	155	90	68	F	yes		Abbreviations
H008	Amphilophus citrinellus	America	Apoyeque		APQ_Acit	O		2016-11-24	125	160	175	81	M	yes		SL=standard length; IL=Intestine length; W=weight
H010	Amphilophus citrinellus	America	Apoyeque		APQ_Acit	O		2016-11-24	115	145	155	61	M	yes		O=omnivore; C=carnivore; H=herbivore; SC=scale-eater; I=insectivore; P=phytoplankton feeder
H015	Amphilophus citrinellus	America	Apoyeque		APQ_Acit	O		2016-11-24	130	175	165	87		yes
H017	Amphilophus citrinellus	America	Apoyeque		APQ_Acit	O		2016-11-24	125	160	140	75		yes
H022	Amphilophus citrinellus	America	Apoyeque		APQ_Acit	O		2016-11-24	130	165	190	77	M	yes
H026	Amphilophus citrinellus	America	Apoyeque		APQ_Acit	O		2016-11-24	130	170	185	98	M	yes
H034	Amphilophus citrinellus	America	Apoyeque		APQ_Acit	O		2016-11-24	120	155	150	71		yes
H040	Amphilophus citrinellus	America	Apoyeque		APQ_Acit	O		2016-11-24	125	165	145	78		yes
H054	Amphilophus citrinellus	America	Apoyeque		APQ_Acit	O		2016-11-24	130	160	170	76		yes
H059	Amphilophus citrinellus	America	Apoyeque		APQ_Acit	O		2016-11-24	115	150	170	61	M	yes
H070	Amphilophus citrinellus	America	Apoyeque		APQ_Acit	O		2016-11-24	125	160	170	71		yes
H075	Amphilophus citrinellus	America	Apoyeque		APQ_Acit	O		2016-11-24	120	160	165	83	M	yes
H081	Amphilophus citrinellus	America	Apoyeque		APQ_Acit	O		2016-11-24	120	150	175	65		yes
H085	Amphilophus citrinellus	America	Apoyeque		APQ_Acit	O		2016-11-24	130	160	220	81		yes
H003	Amphilophus citrinellus lipped	America	Apoyeque		APQ_Acit_lip	O		2016-11-24	120	155	195	62		yes
H006	Amphilophus citrinellus lipped	America	Apoyeque		APQ_Acit_lip	O		2016-11-24	65	85	60	12	F	yes
H007	Amphilophus citrinellus lipped	America	Apoyeque		APQ_Acit_lip	O		2016-11-24	110	155	155	47		yes
H013	Amphilophus citrinellus lipped	America	Apoyeque		APQ_Acit_lip	O		2016-11-24	110	140	125	42		yes
H020	Amphilophus citrinellus lipped	America	Apoyeque		APQ_Acit_lip	O		2016-11-24	120	155	110	69		yes
H023	Amphilophus citrinellus lipped	America	Apoyeque		APQ_Acit_lip	O		2016-11-24	95	120	115	35		yes
H027	Amphilophus citrinellus lipped	America	Apoyeque		APQ_Acit_lip	O		2016-11-24	105	135	110	46		yes
H029	Amphilophus citrinellus lipped	America	Apoyeque		APQ_Acit_lip	O		2016-11-24	80	100	90	18		yes
H036	Amphilophus citrinellus lipped	America	Apoyeque		APQ_Acit_lip	O		2016-11-24	95	120	150	33	F	yes
H048	Amphilophus citrinellus lipped	America	Apoyeque		APQ_Acit_lip	O		2016-11-24	105	130	130	47		yes
H039	Amphilophus astorquii	America	Apoyo		APY_Aast	O	benthic_sup	2016-11-28	145	185	250	108		yes
H357	Amphilophus astorquii	America	Apoyo		APY_Aast	O	benthic_sup	2016-11-28	140	180	145	98	M	yes
H371	Amphilophus astorquii	America	Apoyo		APY_Aast	O	benthic_sup	2016-11-28	135	165	150	89		yes
H372	Amphilophus astorquii	America	Apoyo		APY_Aast	O	benthic_sup	2016-11-28	130	165	105	88	M	yes
H380	Amphilophus astorquii	America	Apoyo		APY_Aast	O	benthic_sup	2016-11-28	135	175	145	93	M	yes
H384	Amphilophus astorquii	America	Apoyo		APY_Aast	O	benthic_sup	2016-11-28	130	170	125	91		yes
H387	Amphilophus astorquii	America	Apoyo		APY_Aast	O	benthic_sup	2016-11-28	130	175	160	92		yes
H390	Amphilophus astorquii	America	Apoyo		APY_Aast	O	benthic_sup	2016-11-28	130	170	110	89	M	yes
H392	Amphilophus astorquii	America	Apoyo		APY_Aast	O	benthic_sup	2016-11-28	140	175	145	97	M	yes
H396	Amphilophus astorquii	America	Apoyo		APY_Aast	O	benthic_sup	2016-11-28	135	175	120	94	M	yes
H414	Amphilophus astorquii	America	Apoyo		APY_Aast	O	benthic_sup	2016-11-28	125	165	240	85	M	yes
H418	Amphilophus astorquii	America	Apoyo		APY_Aast	O	benthic_sup	2016-11-28	135	175	135	87		yes
H444	Amphilophus astorquii	America	Apoyo		APY_Aast	O	benthic_sup	2016-11-28	145	185	190	106	M	yes
H449	Amphilophus astorquii	America	Apoyo		APY_Aast	O	benthic_sup	2016-11-28	130	165	160	94	F	yes
H086	Amphilophus chancho	America	Apoyo		APY_Acha	O	benthic_deep	2016-11-30	140	175	165	116	F	yes
H252	Amphilophus chancho	America	Apoyo		APY_Acha	O	benthic_deep	2016-11-28	140	180	145	137	M	yes
H293	Amphilophus chancho	America	Apoyo		APY_Acha	O	benthic_deep	2016-11-28	170	220	380	203	M	yes
H053	Amphilophus zaliosus	America	Apoyo		APY_Azal	O	limnetic	2016-11-28	180	225	135	167		yes
H227	Amphilophus zaliosus	America	Apoyo		APY_Azal	O	limnetic	2016-11-28	185	230	140	179	M	yes
H288	Amphilophus zaliosus	America	Apoyo		APY_Azal	O	limnetic	2016-11-30	165	210	185	136	M	yes
H294	Amphilophus zaliosus	America	Apoyo		APY_Azal	O	limnetic	2016-11-28	150	195	140	121		yes
H316	Amphilophus zaliosus	America	Apoyo		APY_Azal	O	limnetic	2016-11-28	190	230	125	169		yes
H332	Amphilophus zaliosus	America	Apoyo		APY_Azal	O	limnetic	2016-11-28	185	235	140	189	M	yes
H376	Amphilophus zaliosus	America	Apoyo		APY_Azal	O	limnetic	2016-11-28	140	175	115	86	F	yes
H352	Amphilophus citrinellus	America	Asosoca León		ASL_Acit	O		2016-12-06	115	165	75	76	F	yes
H363	Amphilophus citrinellus	America	Asosoca León		ASL_Acit	O		2016-12-06	125	165	100	80	F	yes
H366	Amphilophus citrinellus	America	Asosoca León		ASL_Acit	O		2016-12-06	130	170	155	89	F	yes
H373	Amphilophus citrinellus	America	Asosoca León		ASL_Acit	O		2016-12-06	125	160	110	76	F	yes
H375	Amphilophus citrinellus	America	Asosoca León		ASL_Acit	O		2016-12-06	85	110	80	26		yes
H381	Amphilophus citrinellus	America	Asosoca León		ASL_Acit	O		2016-12-06	100	130	120	42	F	yes
H391	Amphilophus citrinellus	America	Asosoca León		ASL_Acit	O		2016-12-06	125	160	80	69	F	yes
H400	Amphilophus citrinellus	America	Asosoca León		ASL_Acit	O		2016-12-06	100	130	90	38		yes
H409	Amphilophus citrinellus	America	Asosoca León		ASL_Acit	O		2016-12-06	110	140	125	47	F	yes
H420	Amphilophus citrinellus	America	Asosoca León		ASL_Acit	O		2016-12-06	100	125	105	33		yes
H431	Amphilophus citrinellus	America	Asosoca León		ASL_Acit	O		2016-12-06	95	125	110	36		yes
H436	Amphilophus citrinellus	America	Asosoca León		ASL_Acit	O		2016-12-06	105	125	100	46		yes
H440	Amphilophus citrinellus	America	Asosoca León		ASL_Acit	O		2016-12-06	90	115	110	28		yes
H156	Amphilophus citrinellus	America	Managua	Momotombo	MAN_Acit	O		2016-12-05	160	205	175	207		yes
H167	Amphilophus citrinellus	America	Managua	Momotombo	MAN_Acit	O		2016-12-05	170	215	170	232		yes
H194	Amphilophus citrinellus	America	Managua	Momotombo	MAN_Acit	O		2016-12-05	160	205	175	222		yes
H203	Amphilophus citrinellus	America	Managua	Momotombo	MAN_Acit	O		2016-12-05	160	205	165	201		yes
H206	Amphilophus citrinellus	America	Managua	Momotombo	MAN_Acit	O		2016-12-05	160	205	155	222	F	yes
H278	Amphilophus citrinellus	America	Managua	Momotombo	MAN_Acit	O		2016-12-05	175	225	190	283		yes
H286	Amphilophus citrinellus	America	Managua	Momotombo	MAN_Acit	O		2016-12-05	165	210	160	251		yes
H301	Amphilophus citrinellus	America	Managua	Momotombo	MAN_Acit	O		2016-12-05	165	210	225	266	M	yes
H308	Amphilophus citrinellus	America	Managua	Momotombo	MAN_Acit	O		2016-12-05	165	210	180	244		yes
H334	Amphilophus citrinellus	America	Managua	Momotombo	MAN_Acit	O		2016-12-05	170	215	220	270		yes
H349	Amphilophus citrinellus	America	Managua	Momotombo	MAN_Acit	O		2016-12-05	170	-	250	301	M	yes
H356	Amphilophus citrinellus	America	Masaya		MAS_Acit	O		2016-11-30	120	155	160	77	M	yes
H359	Amphilophus citrinellus	America	Masaya		MAS_Acit	O		2016-11-30	130	165	175	89		yes
H361	Amphilophus citrinellus	America	Masaya		MAS_Acit	O		2016-11-30	115	145	125	66		yes
H362	Amphilophus citrinellus	America	Masaya		MAS_Acit	O		2016-11-30	120	155	120	72	F	yes
H382	Amphilophus citrinellus	America	Masaya		MAS_Acit	O		2016-11-30	125	165	185	83	F	yes
H399	Amphilophus citrinellus	America	Masaya		MAS_Acit	O		2016-11-30	130	165	180	93		yes
H402	Amphilophus citrinellus	America	Masaya		MAS_Acit	O		2016-11-30	140	185	205	119	M	yes
H404	Amphilophus citrinellus	America	Masaya		MAS_Acit	O		2016-11-30	115	150	150	69	F	yes
H413	Amphilophus citrinellus	America	Masaya		MAS_Acit	O		2016-11-30	120	155	130	68		yes
H421	Amphilophus citrinellus	America	Masaya		MAS_Acit	O		2016-11-30	115	155	135	75		yes
H428	Amphilophus citrinellus	America	Masaya		MAS_Acit	O		2016-11-30	115	150	140	68	F	yes
H430	Amphilophus citrinellus	America	Masaya		MAS_Acit	O		2016-11-30	115	150	120	68	F	yes
H448	Amphilophus citrinellus	America	Masaya		MAS_Acit	O		2016-11-30	115	145	160	73	F	yes
H237	Amphilophus citrinellus	America	Nicaragua	Isletas	NIC_Acit	O		2016-12-14	140	180	95	109		yes
H243	Amphilophus citrinellus	America	Nicaragua	Ometepe	NIC_Acit	O		2016-12-13	165	215	150	206	M	yes
H304	Amphilophus citrinellus	America	Nicaragua	Isletas	NIC_Acit	O		2016-12-14	NA		140	NA		yes
H306	Amphilophus citrinellus	America	Nicaragua	Ometepe	NIC_Acit	O		2016-12-13	160	205	150	190	F	yes
H319	Amphilophus citrinellus	America	Nicaragua	Isletas	NIC_Acit	O		2016-12-14	140	185	130	156		yes
H351	Amphilophus citrinellus	America	Nicaragua	Isletas	NIC_Acit	O		2016-12-09	100	135	75	41	F	yes
H378	Amphilophus citrinellus	America	Nicaragua	Ometepe	NIC_Acit	O		2016-12-13	145	185	140	142	F	yes
H395	Amphilophus citrinellus	America	Nicaragua	Ometepe	NIC_Acit	O		2016-12-12	90	115	80	31		yes
H407	Amphilophus citrinellus	America	Nicaragua	Isletas	NIC_Acit	O		2016-12-09	135	165	140	116	F	yes
H408	Amphilophus citrinellus	America	Nicaragua	Ometepe	NIC_Acit	O		2016-12-13	135	175	140	121	F	yes
H416	Amphilophus citrinellus	America	Nicaragua	Isletas	NIC_Acit	O		2016-12-09	95	125	100	39	F	yes
H417	Amphilophus citrinellus	America	Nicaragua	Isletas	NIC_Acit	O		2016-12-09	100	135	110	47		yes
H439	Amphilophus citrinellus	America	Nicaragua	Isletas	NIC_Acit	O		2016-12-09	130	165	120	86		yes
H441	Amphilophus citrinellus	America	Nicaragua	Isletas	NIC_Acit	O		2016-12-09	110	145	95	51		yes
Hi55	Amphilophus citrinellus	America	Nicaragua	Isletas	NIC_Acit	O		2016-12-14	125	160	90	69		yes
Hi67	Amphilophus citrinellus	America	Nicaragua	Isletas	NIC_Acit	O		2016-12-14	120	160	90	81		yes
H214	Amphilophus labiatus	America	Nicaragua	Ometepe	NIC_Alab	O		2016-12-13	185	235	130	239		yes
H251	Amphilophus labiatus	America	Nicaragua	Ometepe	NIC_Alab	O		2016-12-13	190	235	250	221		yes
H327	Amphilophus labiatus	America	Nicaragua	Ometepe	NIC_Alab	O		2016-12-13	185	240	190	233	M	yes
H329	Amphilophus labiatus	America	Nicaragua	Ometepe	NIC_Alab	O		2016-12-13	180	230	180	207		yes
H353	Amphilophus labiatus	America	Nicaragua	Isletas	NIC_Alab	O		2016-12-14	115	145	100	52	F	yes
H367	Amphilophus labiatus	America	Nicaragua	Isletas	NIC_Alab	O		2016-12-09	125	160	90	60		yes
H385	Amphilophus labiatus	America	Nicaragua	Isletas	NIC_Alab	O		2016-12-09	100	130	80	40		yes
H394	Amphilophus labiatus	America	Nicaragua	Ometepe	NIC_Alab	O		2016-12-12	105	135	100	42		yes
H425	Amphilophus labiatus	America	Nicaragua	Ometepe	NIC_Alab	O		2016-12-13	190	250	255	245		yes
H433	Amphilophus labiatus	America	Nicaragua	Ometepe	NIC_Alab	O		2016-12-12	90	115	110	27		yes
H450	Amphilophus labiatus	America	Nicaragua	Ometepe	NIC_Alab	O		2016-12-12	115	145	125	55		yes
Hi41	Amphilophus labiatus	America	Nicaragua	Isletas	NIC_Alab	O		2016-12-14	115	145	80	44		yes
Hi47	Amphilophus labiatus	America	Nicaragua	Isletas	NIC_Alab	O		2016-12-14	95	125	95	36	F	yes
H031	Amphilophus amarillo	America	Xiloá		XIL_Aama	O	benthic_sup	2016-11-22	125	160	90	74	F	yes
H037	Amphilophus amarillo	America	Xiloá		XIL_Aama	O	benthic_sup	2016-11-22	125	160	105	78	F	yes
H042	Amphilophus amarillo	America	Xiloá		XIL_Aama	O	benthic_sup	2016-11-22	135	165	110	97	F	yes
H051	Amphilophus amarillo	America	Xiloá		XIL_Aama	O	benthic_sup	2016-11-22	130	155	125	75	F	yes
H055	Amphilophus amarillo	America	Xiloá		XIL_Aama	O	benthic_sup	2016-11-22	105	135	100	52		yes
H057	Amphilophus amarillo	America	Xiloá		XIL_Aama	O	benthic_sup	2016-11-22	115	145	105	68	F	yes
H060	Amphilophus amarillo	America	Xiloá		XIL_Aama	O	benthic_sup	2016-11-22	115	150	90	65	F	yes
H061	Amphilophus amarillo	America	Xiloá		XIL_Aama	O	benthic_sup	2016-11-22	110	140	105	53		yes
H063	Amphilophus amarillo	America	Xiloá		XIL_Aama	O	benthic_sup	2016-11-22	115	145	105	62		yes
H064	Amphilophus amarillo	America	Xiloá		XIL_Aama	O	benthic_sup	2016-11-22	120	155	85	70		yes
H066	Amphilophus amarillo	America	Xiloá		XIL_Aama	O	benthic_sup	2016-11-22	110	140	95	59	F	yes
H069	Amphilophus amarillo	America	Xiloá		XIL_Aama	O	benthic_sup	2016-11-22	120	155	105	81	F	yes
H087	Amphilophus amarillo	America	Xiloá		XIL_Aama	O	benthic_sup	2016-11-22	115	150	135	66	M	yes
H088	Amphilophus amarillo	America	Xiloá		XIL_Aama	O	benthic_sup	2016-11-22	115	150	90	68	F	yes
H002	Amphilophus sagittae	America	Xiloá	Nautico & farallones	XIL_Asag	O	limnetic	2016-11-23	155	200	145	133	M	yes
H004	Amphilophus sagittae	America	Xiloá	Nautico & farallones	XIL_Asag	O	limnetic	2016-11-23	160	200	135	138	M	yes
H011	Amphilophus sagittae	America	Xiloá	Nautico & farallones	XIL_Asag	O	limnetic	2016-11-23	170	215	130	170	M	yes
H016	Amphilophus sagittae	America	Xiloá	Nautico & farallones	XIL_Asag	O	limnetic	2016-11-23	140	175	105	86	F	yes
H018	Amphilophus sagittae	America	Xiloá	Nautico & farallones	XIL_Asag	O	limnetic	2016-11-23	160	205	120	147	M	yes
H024	Amphilophus sagittae	America	Xiloá	Nautico & farallones	XIL_Asag	O	limnetic	2016-11-23	155	200	150	133	M	yes
H028	Amphilophus sagittae	America	Xiloá	Nautico & farallones	XIL_Asag	O	limnetic	2016-11-23	170	215	145	178	M	yes
H032	Amphilophus sagittae	America	Xiloá	Nautico & farallones	XIL_Asag	O	limnetic	2016-11-23	170	220	150	199	M	yes
H047	Amphilophus sagittae	America	Xiloá	Nautico & farallones	XIL_Asag	O	limnetic	2016-11-23	165	210	65	169	M	yes
H049	Amphilophus sagittae	America	Xiloá	Nautico & farallones	XIL_Asag	O	limnetic	2016-11-23	155	195	115	134	M	yes
H050	Amphilophus sagittae	America	Xiloá		XIL_Asag	O	limnetic	2016-11-22	145	180	100	109		yes
H078	Amphilophus sagittae	America	Xiloá	Nautico & farallones	XIL_Asag	O	limnetic	2016-11-23	155	200	135	153	M	yes
H082	Amphilophus sagittae	America	Xiloá		XIL_Asag	O	limnetic	2016-11-22	155	195	110	125	F	yes
H083	Amphilophus sagittae	America	Xiloá	Nautico & farallones	XIL_Asag	O	limnetic	2016-11-23	165	205	150	141	M	yes
H089	Amphilophus sagittae	America	Xiloá		XIL_Asag	O	limnetic	2016-11-22	145	185	140	113	M	yes
H171	Amphilophus sagittae	America	Xiloá		XIL_Asag	O	limnetic	2016-11-22	140	175	105	100	F	yes
H001	Amphilophus xiolaensis	America	Xiloá	Nautico & farallones	XIL_Axio	O	benthic_deep	2016-11-23	125	160	110	82	F	yes
H005	Amphilophus xiolaensis	America	Xiloá	Nautico & farallones	XIL_Axio	O	benthic_deep	2016-11-23	135	165	125	111		yes
H009	Amphilophus xiolaensis	America	Xiloá	Nautico & farallones	XIL_Axio	O	benthic_deep	2016-11-23	170	215	135	218	M	yes
H012	Amphilophus xiolaensis	America	Xiloá	Nautico & farallones	XIL_Axio	O	benthic_deep	2016-11-23	170	220	130	204	M	yes
H014	Amphilophus xiolaensis	America	Xiloá	Nautico & farallones	XIL_Axio	O	benthic_deep	2016-11-23	150	195	110	152	M	yes
H043	Amphilophus xiolaensis	America	Xiloá	Nautico & farallones	XIL_Axio	O	benthic_deep	2016-11-23	145	160	145	116		yes
H045	Amphilophus xiolaensis	America	Xiloá	Nautico & farallones	XIL_Axio	O	benthic_deep	2016-11-23	150	195	100	146	M	yes
H065	Amphilophus xiolaensis	America	Xiloá	Nautico & farallones	XIL_Axio	O	benthic_deep	2016-11-23	150	185	130	132	F	yes
H072	Amphilophus xiolaensis	America	Xiloá	Nautico & farallones	XIL_Axio	O	benthic_deep	2016-11-23	155	199	210	145	M	yes
H074	Amphilophus xiolaensis	America	Xiloá	Nautico & farallones	XIL_Axio	O	benthic_deep	2016-11-23	165	210	135	172	M	yes
H084	Amphilophus xiolaensis	America	Xiloá	Nautico & farallones	XIL_Axio	O	benthic_deep	2016-11-23	160	205	165	181	M	yes
H090	Amphilophus xiolaensis	America	Xiloá	Nautico & farallones	XIL_Axio	O	benthic_deep	2016-11-23	140	180	150	117	M	yes
H092	Amphilophus xiolaensis	America	Xiloá	Nautico & farallones	XIL_Axio	O	benthic_deep	2016-11-23	150	190	150	140	M	yes
H370	Amphilophus astorquii	America	Apoyo		APY_Aast	O	benthic_sup	2016-11-28	140	180	220	100		no
H177	Amphilophus chancho	America	Apoyo		APY_Acha	O	benthic_deep	2016-11-30	130	165	210	102		no
H461	Amphilophus chancho	America	Apoyo		APY_Acha	O	benthic_deep	2016-11-28	175	260	190	202	M	no
H046	Amphilophus zaliosus	America	Apoyo		APY_Azal	O	limnetic	2016-11-28	190	240	145	224	M	no
H263	Amphilophus zaliosus	America	Apoyo		APY_Azal	O	limnetic	2016-11-28	190	240	160	209	M	no
H354	Amphilophus citrinellus	America	Asosoca León		ASL_Acit	O		2016-12-06	95	125	120	31	F	no
H270	Amphilophus citrinellus	America	Managua	Momotombo	MAN_Acit	O		2016-12-05	165	215	195	234	M	no
H295	Amphilophus labiatus	America	Managua	Momotombo	MAN_Alab	O		2016-12-07	160		200	175		no
H331	Amphilophus citrinellus	America	Managua	Momotombo	MAN_Acit	O		2016-12-05	185	235	135	360		no
H337	Amphilophus citrinellus	America	Managua	Momotombo	MAN_Acit	O		2016-12-05	155	195	175	202	F	no
H423	Amphilophus citrinellus	America	Masaya		MAS_Acit	O		2016-11-30	115	140	135	65	F	no
H238	Amphilophus citrinellus	America	Nicaragua	Isletas	NIC_Acit	O		2016-12-09	160	220	255	116		no
H246	Amphilophus citrinellus	America	Nicaragua	Isletas	NIC_Acit	O		2016-12-14	135	170	175	112	M	no
H336	Amphilophus citrinellus	America	Nicaragua	Isletas	NIC_Acit	O		2016-12-14	155	200	150	181	F	no
H355	Amphilophus labiatus	America	Nicaragua	Isletas	NIC_Alab	O		2016-12-14	120	150	85	56		no
H412	Amphilophus labiatus	America	Nicaragua	Isletas	NIC_Alab	O		2016-12-14	120	150	80	55		no
Hi39	Amphilophus labiatus	America	Nicaragua	Isletas	NIC_Alab	O		2016-12-14	120	150	90	56		no
Hi43	Amphilophus labiatus	America	Nicaragua	Isletas	NIC_Alab	O		2016-12-14	105	130	95	40		no
Hi45	Amphilophus labiatus	America	Nicaragua	Isletas	NIC_Alab	O		2016-12-14	130	160	85	65		no
Hi49	Amphilophus labiatus	America	Nicaragua	Isletas	NIC_Alab	O		2016-12-14	85	110	70	23		no
Hi57	Amphilophus citrinellus	America	Nicaragua	Isletas	NIC_Acit	O		2016-12-14	140	180	145	138	F	no
Hi63	Amphilophus citrinellus	America	Nicaragua	Isletas	NIC_Acit	O		2016-12-14	150	190	110	130		no
H035	Amphilophus labiatus	America	Nicaragua	Ometepe	NIC_Alab	O		2016-12-13	190	230	165	240		no
H268	Amphilophus labiatus	America	Nicaragua	Ometepe	NIC_Alab	O		2016-12-13	195	250	250	250		no
H273	Amphilophus labiatus	America	Nicaragua	Ometepe	NIC_Alab	O		2016-12-13	195	245	260	252		no
H314	Amphilophus labiatus	America	Nicaragua	Ometepe	NIC_Alab	O		2016-12-13	190	240	230	240		no
H344	Amphilophus citrinellus	America	Nicaragua	Ometepe	NIC_Acit	O		2016-12-13	145	190	140	160	F	no
H446	Amphilophus citrinellus	America	Nicaragua	Ometepe	NIC_Acit	O		2016-12-12	145	185	120	153		no
H058	Amphilophus amarillo	America	Xiloá		XIL_Aama	O	benthic_sup	2016-11-22	115	145	90	65	F	no
H052	Amphilophus xiolaensis	America	Xiloá	Nautico & farallones	XIL_Axio	O	benthic_deep	2016-11-23	170	215	140	196	M	no
H080	Amphilophus xiolaensis	America	Xiloá	Nautico & farallones	XIL_Axio	O	benthic_deep	2016-11-23	155	190	150	151	M	no
Kondik.153	Konia dikume	Africa	Barombi		Kondik	I								yes
Kondik.158	Konia dikume	Africa	Barombi		Kondik	I								yes
Kondik.191	Konia dikume	Africa	Barombi		Kondik	I								yes
Koneis.117	Konia eisentrauti	Africa	Barombi		Koneis	O								yes
Koneis.81	Konia eisentrauti	Africa	Barombi		Koneis	O								yes
Koneis.82	Konia eisentrauti	Africa	Barombi		Koneis	O								yes
Koneis.87	Konia eisentrauti	Africa	Barombi		Koneis	O								yes
Myamya.106	Myaka myaka	Africa	Barombi		Myamya	P								yes
Myamya.119	Myaka myaka	Africa	Barombi		Myamya	P								yes
Myamya.137	Myaka myaka	Africa	Barombi		Myamya	P								yes
Myamya.215	Myaka myaka	Africa	Barombi		Myamya	P								yes
Punmac.62	Pungu maclareni	Africa	Barombi		Punmac	O								yes
Punmac.66	Pungu maclareni	Africa	Barombi		Punmac	O								yes
Punmac.83	Pungu maclareni	Africa	Barombi		Punmac	O								yes
Punmac.96	Pungu maclareni	Africa	Barombi		Punmac	O								yes
Punmac.99	Pungu maclareni	Africa	Barombi		Punmac	O								yes
Sarcar.1	Sarotherodon caroli	Africa	Barombi		Sarcar	P								yes
Sarcar.11	Sarotherodon caroli	Africa	Barombi		Sarcar	P								yes
Sarcar.146	Sarotherodon caroli	Africa	Barombi		Sarcar	P								yes
Sarcar.167	Sarotherodon caroli	Africa	Barombi		Sarcar	P								yes
Sarlin.10	Sarotherodon linnellii	Africa	Barombi		Sarlin	P								yes
Sarlin.189	Sarotherodon linnellii	Africa	Barombi		Sarlin	P								yes
Sarlin.32	Sarotherodon linnellii	Africa	Barombi		Sarlin	P								yes
Sarlin.36	Sarotherodon linnellii	Africa	Barombi		Sarlin	P								yes
Sarlin.8	Sarotherodon linnellii	Africa	Barombi		Sarlin	P								yes
Sarloh.140	Sarotherodon lohbergeri	Africa	Barombi		Sarloh	H								yes
Sarloh.26	Sarotherodon lohbergeri	Africa	Barombi		Sarloh	H								yes
Sarloh.97	Sarotherodon lohbergeri	Africa	Barombi		Sarloh	H								yes
Sarste.112	Sarotherodon steinbachi	Africa	Barombi		Sarste	H								yes
Sarste.138	Sarotherodon steinbachi	Africa	Barombi		Sarste	H								yes
Sarste.180	Sarotherodon steinbachi	Africa	Barombi		Sarste	H								yes
Sarste.208	Sarotherodon steinbachi	Africa	Barombi		Sarste	H								yes
Sarste.30	Sarotherodon steinbachi	Africa	Barombi		Sarste	H								yes
Stomar.114	Stomatepia mariae	Africa	Barombi		Stomar	C								yes
Stomar.157	Stomatepia mariae	Africa	Barombi		Stomar	C								yes
Stomar.204	Stomatepia mariae	Africa	Barombi		Stomar	C								yes
Stomar.43	Stomatepia mariae	Africa	Barombi		Stomar	C								yes
Stopin.164	Stomatepia pindu	Africa	Barombi		Stopin	C								yes
Stopin.170	Stomatepia pindu	Africa	Barombi		Stopin	C								yes
Stopin.175	Stomatepia pindu	Africa	Barombi		Stopin	C								yes
Stopin.3	Stomatepia pindu	Africa	Barombi		Stopin	C								yes
Stopin.74	Stomatepia pindu	Africa	Barombi		Stopin	C								yes
Altfas.1	Altolamprologus fasciatus	Africa	Tanganyika		Altfas	C								yes
Altfas.3	Altolamprologus fasciatus	Africa	Tanganyika		Altfas	C								yes
Altfas.4	Altolamprologus fasciatus	Africa	Tanganyika		Altfas	C								yes
Altfas.5	Altolamprologus fasciatus	Africa	Tanganyika		Altfas	C								yes
Audelw.1	Aulonochranus dewindtii	Africa	Tanganyika		Auldew	O								yes
Audelw.2	Aulonochranus dewindtii	Africa	Tanganyika		Auldew	O								yes
Audelw.3	Aulonochranus dewindtii	Africa	Tanganyika		Auldew	O								yes
Audelw.4	Aulonochranus dewindtii	Africa	Tanganyika		Auldew	O								yes
Audelw.5	Aulonochranus dewindtii	Africa	Tanganyika		Auldew	O								yes
Ctehor.1	Ctenochormis horei	Africa	Tanganyika		Ctehor	O								yes
Ctehor.2	Ctenochormis horei	Africa	Tanganyika		Ctehor	O								yes
Ctehor.3	Ctenochormis horei	Africa	Tanganyika		Ctehor	O								yes
Ctehor.4	Ctenochormis horei	Africa	Tanganyika		Ctehor	O								yes
Cypcol.1	Cyprichromis coloratus	Africa	Tanganyika		Cypcol	P								yes
Cypcol.2	Cyprichromis coloratus	Africa	Tanganyika		Cypcol	P								yes
Enamel.1	Enantiopus melanogenys	Africa	Tanganyika		Enamel	C								yes
Enamel.2	Enantiopus melanogenys	Africa	Tanganyika		Enamel	C								yes
Erecya.1	Eretmodus cyanostictus	Africa	Tanganyika		Erecya	H								yes
Erecya.2	Eretmodus cyanostictus	Africa	Tanganyika		Erecya	H								yes
Erecya.3	Eretmodus cyanostictus	Africa	Tanganyika		Erecya	H								yes
Erecya.4	Eretmodus cyanostictus	Africa	Tanganyika		Erecya	H								yes
Erecya.5	Eretmodus cyanostictus	Africa	Tanganyika		Erecya	H								yes
Gnapfe.1	Gnathochromis pfefferi	Africa	Tanganyika		Gnapfe	C								yes
Gnapfe.3	Gnathochromis pfefferi	Africa	Tanganyika		Gnapfe	C								yes
Intloo.1	Interochromis loockii	Africa	Tanganyika		Intloo	H								yes
Intloo.2	Interochromis loockii	Africa	Tanganyika		Intloo	H								yes
Intloo.3	Interochromis loockii	Africa	Tanganyika		Intloo	H								yes
Intloo.4	Interochromis loockii	Africa	Tanganyika		Intloo	H								yes
Intloo.5	Interochromis loockii	Africa	Tanganyika		Intloo	H								yes
Julorn.1	Julidochromis ornatus	Africa	Tanganyika		Julorn	O								yes
Julorn.2	Julidochromis ornatus	Africa	Tanganyika		Julorn	O								yes
Julorn.3	Julidochromis ornatus	Africa	Tanganyika		Julorn	O								yes
Julorn.4	Julidochromis ornatus	Africa	Tanganyika		Julorn	O								yes
Julorn.5	Julidochromis ornatus	Africa	Tanganyika		Julorn	O								yes
Lamlem.1	Lamprologus lemairii	Africa	Tanganyika		Lamlem	C								yes
Lamlem.2	Lamprologus lemairii	Africa	Tanganyika		Lamlem	C								yes
Lamlem.4	Lamprologus lemairii	Africa	Tanganyika		Lamlem	C								yes
Lamlem.5	Lamprologus lemairii	Africa	Tanganyika		Lamlem	C								yes
Lepatt.1	Lepidiolamprologus attenuatus	Africa	Tanganyika		Lepatt	C								yes
Lepatt.2	Lepidiolamprologus attenuatus	Africa	Tanganyika		Lepatt	C								yes
Lepatt.3	Lepidiolamprologus attenuatus	Africa	Tanganyika		Lepatt	C								yes
Lepatt.4	Lepidiolamprologus attenuatus	Africa	Tanganyika		Lepatt	C								yes
Lepatt.5	Lepidiolamprologus attenuatus	Africa	Tanganyika		Lepatt	C								yes
Leplo.1	Lepidiolamprologus eolongatus	Africa	Tanganyika		Lepeol	C								yes
Leplo.2	Lepidiolamprologus eolongatus	Africa	Tanganyika		Lepeol	C								yes
Leplo.3	Lepidiolamprologus eolongatus	Africa	Tanganyika		Lepeol	C								yes
Neopul.1	Neolamprologus pulcher	Africa	Tanganyika		Neopul	H								yes
Neopul.2	Neolamprologus pulcher	Africa	Tanganyika		Neopul	H								yes
Neopul.3	Neolamprologus pulcher	Africa	Tanganyika		Neopul	H								yes
Neopul.4	Neolamprologus pulcher	Africa	Tanganyika		Neopul	H								yes
Neopul.5	Neolamprologus pulcher	Africa	Tanganyika		Neopul	H								yes
Neosav.1	Neolamprologus savoryi	Africa	Tanganyika		Neosav	P								yes
Neosav.2	Neolamprologus savoryi	Africa	Tanganyika		Neosav	P								yes
Neosav.3	Neolamprologus savoryi	Africa	Tanganyika		Neosav	P								yes
Neosav.4	Neolamprologus savoryi	Africa	Tanganyika		Neosav	P								yes
Ophvent.1	Ophthalmotilapia ventralis	Africa	Tanganyika		Ophven	H								yes
Ophvent.2	Ophthalmotilapia ventralis	Africa	Tanganyika		Ophven	H								yes
Ophvent.3	Ophthalmotilapia ventralis	Africa	Tanganyika		Ophven	H								yes
Plestr.1	Plecodus straeleni	Africa	Tanganyika		Plestr	SC								yes
Plestr.2	Plecodus straeleni	Africa	Tanganyika		Plestr	SC								yes
Plestr.3	Plecodus straeleni	Africa	Tanganyika		Plestr	SC								yes
Simbab.1	Simochromis babaulti	Africa	Tanganyika		Simbab	H								yes
Simbab.2	Simochromis babaulti	Africa	Tanganyika		Simbab	H								yes
Simdia.1	Simochromis diagramma	Africa	Tanganyika		Simdia	H								yes
Varmoo.1	Variabilichromis moorii	Africa	Tanganyika		Varmoo	H								yes
Varmoo.2	Variabilichromis moorii	Africa	Tanganyika		Varmoo	H								yes
Xenspi.1	Xenotilapia spilotera	Africa	Tanganyika		Xenspi	O								yes
Xenspi.2	Xenotilapia spilotera	Africa	Tanganyika		Xenspi	O								yes
Xenspi.3	Xenotilapia spilotera	Africa	Tanganyika		Xenspi	O								yes
Xenspi.4	Xenotilapia spilotera	Africa	Tanganyika		Xenspi	O								yes
Xenspi.5	Xenotilapia spilotera	Africa	Tanganyika		Xenspi	O								yes

## Sheet: Table_S2
Midas_run1								Midas_run2								Africa_run
After make.contigs								After make.contigs								After make.contigs
	Start	End	NBases	Ambigs	Polymer	NumSeqs			Start	End	NBases	Ambigs	Polymer	NumSeqs			Start	End	NBases	Ambigs	Polymer	NumSeqs
Minimum:	1	297	297	0	3	1		Minimum:	1	297	297	0	3	1		Minimum:	1	300	300	0	3	1
2.5%-tile:	1	439	439	0	4	237621		2.5%-tile:	1	439	439	0	4	289983		2.5%-tile:	1	439	439	0	4	377828
25%-tile:	1	443	443	0	5	2376204		25%-tile:	1	443	443	0	5	2899823		25%-tile:	1	442	442	0	5	3778276
Median:	1	462	462	0	6	4752407		Median:	1	462	462	0	6	5799645		Median:	1	443	443	0	6	7556551
75%-tile:	1	465	465	0	8	7128610		75%-tile:	1	465	465	1	8	8699467		75%-tile:	1	465	465	3	6	11334826
97.5%-tile:	1	549	549	10	19	9267193		97.5%-tile:	1	546	546	13	16	11309307		97.5%-tile:	1	593	593	20	12	14735274
Maximum:	1	603	602	78	301	9504813		Maximum:	1	603	602	366	301	11599289		Maximum:	1	603	602	75	301	15113101
Mean:	1	467894	467894	0.841707	755179			Mean:	1	467.19	467.19	147585	733618			Mean:	1	460883	460883	282553	588669
No. of Seqs:	9504813							No. of Seqs:	11599289							No. of Seqs:	15113101
After screen.seqs (maxambig=0, maxlength=510, maxhomop=8)								After screen.seqs (maxambig=0, maxlength=510, maxhomop=8)								After screen.seqs (maxambig=0, maxlength=510, maxhomop=8)
Minimum:	1	301	301	0	3	1		Minimum:	1	301	301	0	3	1		Minimum:	1	301	301	0	3	1
2.5%-tile:	1	439	439	0	4	139517		2.5%-tile:	1	439	439	0	4	150604		2.5%-tile:	1	439	439	0	4	197204
25%-tile:	1	443	443	0	5	1395162		25%-tile:	1	443	443	0	5	1506031		25%-tile:	1	442	442	0	5	1972032
Median:	1	459	459	0	6	2790324		Median:	1	459	459	0	6	3012061		Median:	1	443	443	0	5	3944063
75%-tile:	1	465	465	0	6	4185486		75%-tile:	1	465	465	0	6	4518091		75%-tile:	1	462	462	0	6	5916094
97.5%-tile:	1	465	465	0	6	5441131		97.5%-tile:	1	466	466	0	6	5873518		97.5%-tile:	1	466	466	0	6	7690921
Maximum:	1	510	510	0	8	5580647		Maximum:	1	510	510	0	8	6024120		Maximum:	1	510	510	0	8	7888124
Mean:	1	452797	452797	0	541184			Mean:	1	452.72	452.72	0	540649			Mean:	1	448368	448368	0	528817
Number of Seqs:	5580647							Number of Seqs:	6024120							Number of Seqs:	7888124
Final No. of Seqs (after vsearch)	5234990							Final No. of Seqs (after vsearch)	5655269							Final No. of Seqs (after vsearch)	7397114

## Sheet: Table_S3
OTU ID	F420	H001	H002	H003	H004	H005	H006	H007	H008	H009	H010	H011	H012	H013	H014	H015	H016	H017	H018	H020	H022	H023	H024	H026	H027	H028	H029	H031	H032	H034	H036	H037	H039	H040	H042	H043	H045	H047	H048	H049	H050	H051	H053	H054	H055	H057	H059	H060	H061
694262	0	0	0	0	0	0	0	0	0	0	0	0	0	0	0	0	0	0	0	0	0	0	0	0	0	0	0	0	0	0	0	0	0	0	0	0	0	0	0	0	0	0	0	0	0	0	0	0	0
359433	0	34	0	0	0	55	0	0	0	8	0	0	0	0	0	0	4	0	39	0	0	0	7	0	0	0	0	792	0	0	0	265	176	0	37	26	17	0	0	0	9	17	0	0	14	107	0	94	0
550406	0	0	0	0	0	0	0	0	0	0	0	0	0	0	0	0	0	0	0	0	0	0	0	0	0	5	0	0	0	0	0	5	0	0	6	14	4	0	0	0	0	0	0	0	0	0	0	7	0
New.CleanUp.ReferenceOTU105704	0	0	0	0	0	0	0	0	0	0	0	0	0	0	369	0	0	0	0	0	0	0	0	0	0	0	0	0	0	0	0	0	0	0	0	0	3	0	0	0	0	0	0	0	0	0	0	0	0
1117629	0	0	0	0	0	0	0	0	0	0	0	0	0	0	202	0	0	0	0	0	0	0	0	0	0	0	0	0	0	0	0	0	0	0	0	0	0	0	0	0	0	0	0	0	0	0	0	0	0
New.CleanUp.ReferenceOTU156354	0	0	0	0	0	0	0	0	0	0	0	0	0	0	0	0	0	0	0	0	0	0	0	0	0	0	0	0	0	0	0	0	0	0	0	0	0	0	0	0	0	0	0	0	0	0	0	0	0
4417091	0	0	0	0	0	0	0	0	0	0	0	0	0	0	0	0	0	0	0	0	0	0	0	0	0	0	0	13	0	0	0	4	0	0	0	0	0	0	0	0	0	0	0	0	0	0	0	0	0
161475	0	0	0	0	0	0	0	0	0	0	0	0	0	0	0	0	0	0	0	0	0	0	0	0	0	0	0	10	0	0	0	4	0	0	0	0	0	0	0	0	0	0	0	0	0	0	0	0	0
New.CleanUp.ReferenceOTU20269	0	0	0	0	0	0	0	0	0	0	0	0	0	0	0	0	0	0	0	0	0	0	0	0	0	0	0	0	0	0	0	5	0	0	0	0	0	0	0	0	0	0	0	0	0	0	0	0	0
4466942	0	0	0	0	0	0	0	0	0	0	0	0	0	0	0	0	0	0	0	0	0	0	0	0	0	0	0	0	0	0	0	0	0	0	0	0	0	0	0	0	0	0	0	0	0	0	0	0	0
New.CleanUp.ReferenceOTU116451	0	3	0	0	0	0	0	0	0	0	0	0	0	0	0	0	0	0	0	0	0	0	0	0	0	0	0	0	0	0	0	7	0	0	0	4	0	0	0	0	0	0	0	0	0	0	0	0	0
244670	0	0	0	0	0	27	0	0	0	0	0	0	0	0	0	0	0	0	0	0	0	0	0	0	0	0	0	0	0	0	0	31	6	0	9	5	0	0	0	0	0	0	0	0	0	0	0	8	0
New.ReferenceOTU1175	0	0	0	0	0	0	0	0	0	0	0	0	0	0	0	0	0	0	0	0	0	0	0	0	0	0	0	0	0	0	0	3	5	0	0	0	0	0	0	0	0	0	0	0	0	0	0	0	0
1048864	0	0	0	0	0	0	0	0	0	0	0	0	0	0	0	0	0	0	0	0	0	0	0	0	0	0	0	0	0	0	0	0	0	0	0	0	0	0	0	0	0	0	0	0	0	0	0	0	0
New.ReferenceOTU552	0	0	0	0	0	0	0	0	0	0	0	0	0	0	0	0	0	0	0	0	0	0	0	0	0	0	0	0	0	0	0	0	0	0	0	0	0	0	0	0	0	0	0	0	0	0	0	0	0
180033	0	4	0	0	0	0	0	0	0	0	0	0	0	0	0	0	0	0	0	0	0	0	4	0	0	0	0	0	0	0	0	56	4	0	19	0	0	0	0	0	0	0	0	0	0	0	0	14	0
New.CleanUp.ReferenceOTU350670	0	0	0	0	0	0	0	0	0	0	0	0	0	0	0	0	0	0	0	0	0	0	0	0	0	0	0	0	0	0	0	10	0	0	0	0	0	0	0	0	0	0	0	0	0	0	0	0	0
693926	0	0	0	0	0	0	0	0	0	0	0	0	0	0	0	0	0	0	0	0	0	0	0	0	0	0	0	0	0	0	0	0	0	0	0	0	0	0	0	0	0	0	0	0	0	0	0	0	0
New.CleanUp.ReferenceOTU75652	0	0	0	0	0	0	0	0	0	0	0	0	0	0	0	0	0	0	0	0	0	0	0	0	0	0	0	0	0	0	0	0	0	0	0	0	0	0	0	0	0	0	0	0	0	0	0	0	0
232365	0	0	0	0	0	0	0	0	0	0	0	0	0	0	0	0	0	0	0	0	0	0	0	0	0	0	0	0	0	0	0	0	0	0	0	0	0	0	0	0	0	0	0	0	0	0	0	0	0
4339236	0	0	0	0	0	0	0	0	0	0	0	0	0	0	0	0	0	0	0	0	0	0	0	0	0	0	0	0	0	0	0	0	0	0	0	0	0	0	0	0	0	0	0	0	0	0	0	0	0
New.ReferenceOTU126	0	0	0	0	0	0	0	0	0	0	0	0	0	0	0	0	0	0	0	0	0	0	0	0	0	0	0	0	0	0	0	0	0	0	0	0	0	0	0	0	0	0	0	0	0	0	0	0	0
New.ReferenceOTU1078	0	0	0	0	0	0	0	0	0	0	0	0	0	0	0	0	0	0	0	0	0	0	0	0	0	0	0	0	0	0	0	0	0	0	0	0	0	0	0	0	0	0	0	0	0	0	0	0	0
New.CleanUp.ReferenceOTU37400	0	0	0	0	0	0	0	0	0	0	0	0	0	0	0	0	0	0	0	0	0	0	0	0	0	0	0	0	0	0	0	0	0	0	0	0	0	0	0	0	0	0	0	0	0	0	0	0	0
4316439	0	0	0	0	0	0	0	0	0	0	0	0	0	0	0	0	0	0	0	0	0	0	0	0	0	0	0	0	0	0	0	0	0	0	0	0	0	0	0	0	0	0	0	0	0	0	0	0	0
1107738	0	0	0	0	0	0	0	0	0	0	0	0	0	0	0	0	0	0	0	0	0	0	0	0	0	0	0	0	0	0	0	0	0	0	0	0	0	0	0	0	0	0	0	0	0	0	0	0	0
New.CleanUp.ReferenceOTU44294	0	0	0	0	0	0	0	0	0	0	0	0	0	0	0	0	0	0	0	0	0	0	0	0	0	0	0	0	0	0	0	0	0	0	0	0	0	0	0	0	0	0	0	0	0	0	0	0	0
New.CleanUp.ReferenceOTU276326	0	0	0	0	0	0	0	0	0	0	0	0	0	0	0	0	0	0	0	0	0	0	0	0	0	0	0	0	0	0	0	0	0	0	0	0	0	0	0	0	0	0	0	0	0	0	0	0	0
New.CleanUp.ReferenceOTU88324	0	0	0	0	0	0	0	0	0	0	0	0	0	0	0	0	0	0	0	0	0	0	0	0	0	0	0	0	0	0	0	0	6	0	0	0	0	0	0	0	0	0	0	0	0	0	0	0	0
142411	0	0	0	0	0	0	0	0	0	0	0	0	0	0	0	0	0	0	0	0	0	0	0	0	0	0	0	0	0	0	0	0	0	0	0	0	0	0	0	0	0	0	0	0	0	0	0	0	0
4409930	0	0	0	0	0	0	0	0	0	0	0	0	0	0	0	0	0	0	0	0	0	0	0	0	0	0	0	0	0	0	0	0	0	0	0	0	0	0	0	0	0	0	0	0	0	0	0	0	0
810882	0	0	0	0	0	0	0	0	0	0	0	0	0	0	0	0	0	0	0	0	0	0	0	0	6	3	0	20	0	0	0	26	0	0	0	0	0	0	0	0	0	0	0	0	0	0	0	3	0
4377639	0	0	0	0	0	0	0	0	0	0	0	0	0	0	0	0	0	0	0	0	0	0	0	0	0	0	0	0	0	0	0	0	0	0	0	0	0	0	0	0	0	0	0	0	0	0	0	0	0
539570	0	0	0	0	0	0	0	0	0	3	0	0	0	0	0	0	0	0	0	0	0	0	0	0	0	0	0	49	0	0	0	20	0	0	0	0	0	0	0	0	0	0	0	0	0	0	0	3	0
563302	0	0	0	0	0	3	0	0	0	0	0	0	0	0	0	0	0	0	0	0	0	0	0	0	0	0	0	0	0	0	0	13	0	0	4	0	0	0	0	0	0	0	0	0	0	0	0	0	0
New.ReferenceOTU33	0	5	0	0	0	0	0	0	0	17	0	0	0	0	0	0	0	0	0	0	0	0	0	0	0	0	0	44	0	0	0	23	37	0	20	0	0	0	0	0	0	0	0	0	0	0	0	21	0
New.CleanUp.ReferenceOTU309724	0	0	0	0	0	4	0	0	0	0	0	0	0	0	0	0	0	0	0	0	0	0	3	0	0	0	0	0	0	0	0	12	4	0	13	6	0	0	0	0	0	0	0	0	0	0	0	7	0
809729	0	0	0	0	0	0	0	0	0	0	0	0	0	0	0	0	0	0	0	0	0	0	0	0	0	0	0	0	0	0	0	0	9	0	0	0	0	0	0	0	0	0	0	0	0	0	0	0	0
1111247	0	0	0	0	0	0	0	0	0	6	0	0	0	0	0	0	0	0	0	0	0	0	0	0	0	0	0	0	0	0	0	11	6	0	0	0	0	0	0	0	0	0	0	0	0	0	0	4	0
4438838	0	0	0	0	0	0	0	0	0	0	0	0	0	0	0	0	0	0	0	0	0	0	0	0	0	0	0	0	0	0	0	17	0	0	0	0	0	0	0	0	0	0	0	0	0	0	0	4	0
New.CleanUp.ReferenceOTU205677	0	0	0	0	0	37	0	0	0	4	0	0	0	0	0	0	0	0	0	0	0	0	0	0	0	0	0	0	0	0	0	9	34	0	0	4	0	0	0	0	0	0	0	0	0	0	0	5	0
581733	0	0	0	0	0	0	0	0	0	0	0	0	0	0	0	0	0	0	0	0	0	0	0	0	0	0	0	0	0	0	0	0	0	0	0	0	0	0	0	0	0	0	0	0	0	0	0	0	0
New.CleanUp.ReferenceOTU354053	0	0	0	0	0	0	0	0	0	0	0	0	0	0	0	0	0	0	0	0	0	0	0	0	0	0	0	0	0	0	0	25	0	0	0	0	3	0	0	0	0	0	0	0	0	0	0	0	0
651979	0	0	0	0	0	0	0	0	0	5	0	0	0	0	0	0	0	0	0	0	0	0	0	0	0	0	0	37	0	0	0	0	0	0	0	0	0	0	0	0	0	0	0	0	0	0	0	0	0
673712	0	0	0	0	0	0	0	0	0	0	0	0	0	0	0	0	0	0	0	0	0	0	0	0	0	0	0	0	0	0	0	0	0	0	0	0	0	0	0	0	0	0	0	0	0	0	0	0	0
563157	0	0	0	0	0	0	0	0	0	0	0	0	0	0	0	0	0	0	0	0	0	0	0	0	0	0	0	0	0	0	0	0	0	0	0	0	0	0	0	0	0	0	0	0	0	0	0	0	0
1123533	0	0	0	0	0	0	0	0	0	0	0	0	0	0	0	0	0	0	0	0	0	0	0	0	0	0	0	0	0	0	0	0	0	0	0	0	0	0	0	0	0	0	0	0	0	0	0	0	0
1138660	0	0	0	0	0	0	0	0	0	0	0	0	0	0	0	0	0	0	0	0	0	0	0	0	0	0	0	0	0	0	0	0	0	0	0	0	0	0	0	0	0	0	0	0	0	0	0	0	0
New.CleanUp.ReferenceOTU302590	0	0	0	0	0	0	0	0	0	0	0	0	0	0	0	0	0	0	0	0	0	0	0	0	0	0	0	0	0	0	0	0	0	0	0	0	0	0	0	0	0	0	0	0	0	0	0	0	0
778825	0	0	0	0	10	12	0	0	0	0	0	0	0	0	0	0	4	0	0	0	0	0	3	0	0	6	0	0	0	0	0	5	84	0	6	0	4	0	0	0	0	4	0	0	0	0	0	0	0
1115183	0	0	0	0	0	0	0	0	0	0	0	0	0	0	0	0	0	0	0	0	0	0	0	0	0	0	0	0	0	0	0	0	0	0	0	0	0	0	0	0	0	0	0	0	0	0	0	0	0
545538	0	0	0	0	0	15	0	0	0	0	0	0	0	0	0	0	0	0	0	0	0	0	0	0	0	0	0	0	0	0	0	21	0	0	0	0	0	0	0	0	0	0	0	0	0	0	0	5	0
New.CleanUp.ReferenceOTU118726	0	0	0	0	0	0	0	0	0	0	0	0	0	0	25	0	0	0	0	0	0	0	0	0	0	0	0	0	0	0	0	27	0	0	0	5	0	0	0	0	0	0	0	0	0	0	0	3	0
New.CleanUp.ReferenceOTU82926	0	0	0	0	0	16	0	0	0	0	0	0	0	0	0	0	0	0	0	0	0	0	0	0	0	0	0	0	0	0	0	7	0	0	0	0	0	0	0	0	0	0	0	0	0	0	0	3	0
2970574	0	0	0	0	0	24	0	0	0	0	0	0	0	0	0	0	0	0	0	0	0	0	0	0	0	0	0	0	0	0	0	0	0	0	0	0	0	0	0	23	0	0	0	0	0	0	0	3	0
136325	0	0	0	0	0	0	0	0	0	0	0	0	0	0	0	0	0	0	0	0	0	0	0	0	0	0	0	0	0	0	0	0	0	0	0	0	0	0	0	0	0	0	0	0	0	0	0	0	0
New.CleanUp.ReferenceOTU5049	0	0	0	0	0	0	0	0	0	0	0	0	0	0	0	0	0	0	0	0	0	0	0	0	0	0	0	0	0	0	0	0	0	0	0	0	0	0	0	0	0	0	0	0	0	0	0	0	0
572134	0	0	0	0	0	0	0	0	0	0	0	0	0	0	0	0	0	0	0	0	0	0	0	0	0	0	0	0	0	0	0	0	0	0	0	0	0	0	0	0	0	0	0	0	0	0	0	0	0
978693	0	9	0	0	4	70	0	0	0	33	0	4	0	0	0	0	11	0	470	0	0	0	0	0	0	5	0	0	4	0	0	11	41	0	9	16	0	0	0	41	8	7	0	0	7	0	0	24	3
New.CleanUp.ReferenceOTU335435	0	0	0	0	6	32	0	0	0	11	0	0	0	0	0	0	0	0	231	0	0	0	0	0	0	0	0	0	0	0	0	4	29	0	6	5	0	0	0	23	0	3	0	0	4	0	0	11	0
818461	0	5	0	0	0	0	0	0	0	0	0	0	0	0	0	0	0	0	0	0	0	0	0	0	0	0	0	0	0	0	0	0	0	0	0	0	0	0	0	0	0	0	0	0	0	0	0	0	0
4343907	0	0	0	0	0	0	0	0	0	0	0	0	0	0	0	0	0	0	0	0	0	0	0	0	0	0	0	0	0	0	0	0	0	0	0	0	0	0	0	0	0	0	0	0	0	0	0	0	0
252625	0	0	0	0	0	31	0	0	0	4	0	0	0	0	0	0	0	0	0	0	0	0	0	0	0	26	0	0	0	0	0	10	34	0	6	0	0	0	0	11	0	0	0	0	0	0	0	14	0
New.CleanUp.ReferenceOTU192022	0	0	0	0	0	0	0	0	0	0	0	0	0	0	0	0	0	0	0	0	0	0	0	0	0	0	0	0	0	0	0	0	0	0	0	0	0	0	0	0	0	0	0	0	0	0	0	0	0
4352972	0	0	0	0	0	0	0	0	0	0	0	0	0	0	0	0	0	0	0	0	0	0	0	0	0	0	0	0	0	0	0	0	0	0	0	0	0	0	0	0	0	0	0	0	0	0	0	0	0
824462	0	0	0	0	0	0	0	0	0	0	0	0	0	0	0	0	0	0	0	0	0	0	0	0	0	0	0	0	0	0	0	7	0	0	0	0	0	0	0	0	0	0	0	0	0	0	0	0	0
New.ReferenceOTU25	0	0	0	0	0	0	0	0	0	0	0	0	0	0	0	0	0	0	0	0	0	0	0	0	0	0	0	0	0	0	0	0	0	0	0	0	0	0	0	0	0	0	0	0	0	0	0	0	0
510547	4	0	0	0	0	0	0	0	0	0	0	0	0	17	0	8	0	0	0	0	0	0	0	16	0	0	0	0	0	0	0	7	0	0	0	0	0	3	0	0	0	0	0	4	0	0	0	3	0
984175	0	0	0	0	0	0	0	0	0	0	0	0	0	0	0	0	0	0	0	0	0	0	0	0	0	0	0	0	0	0	0	0	0	0	0	0	0	0	0	0	0	0	0	0	0	0	0	0	0
New.ReferenceOTU38	0	0	0	0	0	0	0	0	0	0	0	0	0	0	0	5	0	0	0	0	0	0	0	0	3	0	0	0	0	0	0	0	0	5	0	0	0	0	0	0	0	0	0	0	0	0	0	0	0
162176	0	28	0	0	0	16	3	0	0	33	0	0	0	43	0	4	0	3	0	0	0	0	0	0	16	0	0	674	6	0	0	61	59	16	19	3	9	0	0	0	0	19	0	0	0	0	3	89	8
949545	0	0	0	0	0	0	0	0	0	0	0	0	0	31	0	0	0	0	0	0	0	0	0	0	7	0	0	0	0	0	0	0	0	11	0	0	0	0	0	0	0	0	0	4	0	0	3	0	0
222905	0	0	0	0	0	0	0	0	0	0	0	0	0	0	0	0	0	0	0	0	0	0	0	0	0	0	0	0	0	0	0	0	5	0	0	0	0	0	0	0	0	0	0	0	0	0	0	0	0
New.ReferenceOTU579	0	0	0	0	0	0	0	0	0	0	0	0	0	0	0	0	0	0	0	0	0	0	0	0	0	0	0	0	0	0	0	0	0	0	0	0	0	0	0	0	0	0	0	0	0	0	0	0	0
4364514	0	0	0	0	0	0	0	0	0	0	0	0	0	0	0	0	0	0	0	0	0	0	0	0	0	0	0	0	0	0	0	0	0	0	0	0	0	0	0	0	0	0	0	0	0	0	0	0	0
New.ReferenceOTU112	0	0	0	0	0	0	0	0	0	0	0	0	0	0	0	0	0	0	0	0	0	0	0	0	0	0	0	0	0	0	0	0	0	0	0	0	0	0	0	0	0	0	0	0	0	0	0	0	0
New.ReferenceOTU119	0	0	0	0	0	0	9	6	0	0	0	0	0	612	0	7	0	10	0	0	0	4	0	0	39	0	3	0	0	0	6	3	0	41	0	0	0	0	0	0	0	0	0	0	0	0	0	0	0
New.ReferenceOTU646	0	0	0	0	0	0	0	0	0	0	0	0	0	0	0	0	0	0	0	0	0	0	0	0	5	0	0	0	0	0	0	5	0	0	0	0	0	0	0	0	0	0	0	0	0	0	0	0	0
New.ReferenceOTU917	0	0	0	0	0	0	0	0	0	0	0	0	0	0	0	4	0	0	0	0	0	0	0	0	0	0	0	0	0	0	0	0	0	0	0	0	0	0	0	0	0	0	0	0	0	0	0	0	0
210507	0	0	0	0	0	0	0	0	0	0	0	0	0	0	0	0	0	0	0	0	0	0	0	0	0	0	0	0	0	0	0	0	0	7	0	0	0	0	0	0	0	0	0	0	0	0	0	0	0
223441	0	0	0	0	0	0	0	0	0	0	0	0	0	0	0	0	0	0	0	0	0	0	0	0	6	0	0	0	0	0	0	0	0	0	0	0	0	0	0	0	0	0	0	0	0	0	0	0	0
56545	0	0	0	0	0	0	0	0	0	0	0	0	0	47	0	0	0	0	0	0	0	0	0	0	16	0	0	0	0	0	0	0	0	9	0	0	0	0	0	0	0	0	0	0	0	0	0	0	0
947475	0	0	0	0	0	0	0	0	0	0	0	0	0	0	0	0	0	0	0	0	0	0	0	0	0	0	0	0	0	0	0	0	0	0	0	0	0	0	0	0	0	0	0	0	0	0	0	0	0
New.CleanUp.ReferenceOTU17971	0	0	0	0	0	0	0	0	0	0	0	0	0	0	0	0	0	0	0	0	0	0	0	0	0	0	0	0	0	0	0	0	0	0	0	0	0	0	0	0	0	0	0	0	0	0	0	0	0
New.CleanUp.ReferenceOTU328679	0	0	0	0	0	0	0	0	0	0	0	0	0	0	0	0	0	0	0	0	0	0	0	0	0	0	0	0	0	0	0	0	0	0	0	0	0	0	0	0	0	0	0	0	0	0	0	0	0
New.CleanUp.ReferenceOTU295007	0	0	0	0	0	0	0	0	0	0	0	0	0	0	0	0	0	0	0	0	0	0	0	0	0	0	0	0	0	0	0	0	0	0	0	0	0	0	0	0	0	0	0	0	0	0	0	0	0
New.CleanUp.ReferenceOTU190490	0	0	0	0	0	0	0	0	0	0	0	0	0	0	0	0	0	0	0	0	0	0	0	0	0	0	0	0	0	0	0	0	0	0	0	0	0	0	0	0	0	0	0	0	0	0	0	0	0
257150	0	0	0	0	0	0	0	0	0	0	0	0	0	0	0	0	0	0	0	0	0	0	0	0	0	0	0	0	0	0	0	0	0	0	0	0	0	0	0	0	0	0	0	0	0	0	0	0	0
566820	0	7	0	0	0	0	0	0	0	3	0	0	5	0	130	0	0	0	0	0	0	0	0	0	0	0	0	0	6	0	0	7	0	0	0	21	8	0	0	0	0	0	0	0	0	0	0	0	0
984386	0	0	0	0	0	0	0	0	0	0	0	0	0	0	0	0	0	0	0	0	0	0	0	0	0	0	0	0	0	0	0	0	0	0	0	0	0	0	0	0	0	0	0	0	0	0	0	0	0
1068936	0	0	0	0	0	0	0	4	0	0	0	0	0	0	0	0	0	0	0	0	0	0	0	0	0	0	0	0	0	0	0	0	0	5	0	0	0	0	0	0	0	0	0	0	0	0	0	0	0
New.CleanUp.ReferenceOTU354893	0	0	0	0	0	0	0	0	48	0	0	0	0	0	0	0	0	0	0	0	0	0	0	0	0	0	0	0	0	0	0	0	0	0	0	0	0	0	0	0	0	0	0	0	0	0	0	0	0
257322	0	0	0	0	0	0	0	0	0	0	0	0	0	0	0	0	0	0	0	0	0	0	0	0	0	0	0	0	0	0	0	0	0	0	0	0	0	0	0	0	0	0	0	0	0	0	0	0	0
New.CleanUp.ReferenceOTU310452	0	0	0	0	0	0	0	0	0	0	0	0	0	0	0	0	0	0	0	0	0	0	0	0	0	0	0	0	0	0	0	0	3	0	0	0	0	0	0	0	0	0	0	0	0	0	0	3	0
New.CleanUp.ReferenceOTU159987	0	0	0	0	0	0	0	0	0	0	0	0	0	0	0	0	0	0	0	0	0	0	0	0	0	0	0	0	0	0	0	0	0	0	0	0	0	0	0	0	0	0	0	0	0	0	0	0	0
920225	0	0	0	0	0	0	0	0	0	0	0	0	0	0	0	0	0	0	0	0	0	0	0	0	0	0	0	0	0	0	0	0	0	0	0	0	0	0	0	0	0	0	0	0	0	0	0	0	0
New.CleanUp.ReferenceOTU358471	3	5	0	0	0	0	0	0	0	4	0	0	0	0	0	3	0	0	0	0	0	0	0	0	4	0	0	0	0	0	5	0	0	8	0	3	0	0	0	0	0	0	0	0	0	0	7	0	0
New.ReferenceOTU1044	0	0	0	0	0	0	0	0	0	0	0	0	0	0	0	0	0	0	23	0	0	0	0	0	0	0	0	0	0	0	0	0	0	0	0	0	0	0	0	0	0	0	0	0	0	0	0	0	0
167937	0	0	0	0	0	0	0	0	0	0	0	0	0	0	0	3	0	0	0	0	0	0	0	0	0	0	0	0	0	0	0	0	0	0	0	0	0	0	0	0	0	0	0	0	0	0	0	0	0
New.CleanUp.ReferenceOTU39014	0	0	0	0	0	0	0	0	0	0	0	0	0	0	0	0	0	0	0	0	0	0	0	0	0	0	0	0	0	0	0	0	0	0	0	0	0	0	0	0	0	0	0	0	0	0	0	0	0
New.CleanUp.ReferenceOTU245390	0	0	0	0	0	0	0	0	0	0	0	0	0	0	0	0	0	0	0	0	0	0	0	0	0	0	0	0	0	0	0	0	0	0	0	0	0	0	0	0	0	0	0	0	0	0	0	0	0
1039546	0	0	0	0	0	0	0	0	0	0	0	0	0	0	0	0	0	0	0	0	0	0	0	0	0	0	0	0	0	0	0	0	0	0	0	0	0	0	0	0	0	0	0	0	0	0	0	0	0
1128417	0	0	0	0	0	0	0	0	0	0	0	0	0	0	0	0	0	0	0	0	0	0	0	0	0	0	0	0	0	0	0	0	0	0	0	0	0	0	0	0	0	0	0	0	0	0	0	0	0
651642	0	0	0	0	0	0	0	0	0	0	0	0	0	0	0	0	0	0	0	0	0	0	0	0	0	0	0	0	0	0	0	0	0	0	0	0	0	0	0	0	0	0	0	0	0	0	0	0	0
New.ReferenceOTU661	0	0	0	0	0	0	0	0	0	0	0	0	0	0	0	0	0	0	0	0	0	0	0	0	0	0	0	0	0	0	0	0	0	0	0	0	0	0	0	0	0	0	0	0	0	0	0	0	0
New.CleanUp.ReferenceOTU172481	0	0	0	0	0	0	0	0	0	0	0	0	0	0	0	0	0	0	0	0	0	0	0	0	0	0	0	0	0	0	0	0	0	0	0	0	0	0	0	0	0	0	0	0	0	0	0	0	0
New.CleanUp.ReferenceOTU291105	0	0	0	0	0	0	0	0	0	0	0	0	0	0	0	0	0	0	0	0	0	0	0	0	0	0	0	0	0	0	0	0	0	0	0	0	0	0	0	0	0	0	0	0	0	0	0	0	0
New.CleanUp.ReferenceOTU42893	0	0	0	0	0	0	0	0	0	0	0	0	0	0	0	0	0	0	0	0	0	0	0	0	0	0	0	0	0	0	0	0	0	0	0	0	0	0	0	0	0	0	0	0	0	0	0	0	0
New.CleanUp.ReferenceOTU12142	0	0	0	0	0	0	0	0	0	0	0	0	0	0	0	0	0	0	0	0	0	0	0	0	0	0	0	0	0	0	0	0	0	0	0	0	0	0	0	0	0	0	0	0	0	0	0	0	0
532624	0	0	0	0	0	0	0	0	0	0	0	0	0	0	51	0	0	0	0	0	0	0	0	0	0	0	0	0	0	0	0	0	0	0	0	0	0	0	0	0	0	0	0	0	0	0	0	0	0
1126195	0	0	0	0	0	0	0	0	0	0	0	0	0	0	0	0	0	0	0	0	0	0	0	0	0	0	0	0	0	0	0	0	0	0	0	0	0	0	0	0	0	0	0	0	0	0	0	0	0
New.ReferenceOTU398	0	0	0	0	0	0	0	0	0	0	0	0	0	0	0	0	0	0	0	0	0	0	0	0	0	0	0	0	0	0	0	0	0	0	0	0	0	0	0	0	0	0	0	0	0	0	0	0	0
New.CleanUp.ReferenceOTU7802	0	0	0	0	0	0	0	0	0	0	0	0	0	0	0	0	0	0	0	0	0	0	0	0	0	0	0	0	0	0	0	0	0	0	0	0	0	0	0	0	0	0	0	0	0	0	0	0	0
New.CleanUp.ReferenceOTU304476	0	0	0	0	0	0	0	0	0	0	0	0	0	0	0	0	0	0	0	0	0	0	0	0	0	0	0	0	0	0	0	0	0	0	0	0	0	0	0	0	0	0	0	0	0	0	0	0	0
New.CleanUp.ReferenceOTU37016	0	0	0	0	0	0	0	0	0	0	0	0	0	0	0	0	0	0	0	0	0	0	0	0	0	0	0	0	0	0	0	0	0	0	0	0	0	0	0	0	0	0	0	0	0	0	0	0	0
900840	0	0	0	0	0	0	0	0	0	0	0	0	0	0	0	0	0	0	0	0	0	0	0	0	0	0	0	26	0	0	0	0	0	0	0	0	0	0	0	0	0	0	0	0	0	0	0	0	0
New.CleanUp.ReferenceOTU262803	0	0	0	0	0	0	0	0	0	0	0	0	0	0	0	0	0	0	0	0	0	0	0	0	0	0	0	0	0	0	0	0	0	0	0	0	0	0	0	0	0	0	0	0	0	0	0	0	0
955577	0	0	0	0	0	0	0	0	0	0	0	0	0	0	0	0	0	0	0	0	0	0	0	0	0	0	0	0	0	0	0	0	0	0	0	0	0	0	0	0	0	0	0	0	0	0	0	0	0
225425	0	0	0	0	0	0	0	0	0	0	0	0	0	0	0	0	0	0	0	0	0	0	0	0	0	0	0	0	0	0	0	0	0	0	0	0	0	0	0	0	0	0	0	0	0	0	0	0	0
827008	0	0	0	0	0	0	3	0	0	0	0	0	0	0	0	0	0	0	0	0	0	0	0	0	4	0	0	0	0	0	0	0	0	0	0	0	0	0	0	0	0	0	0	0	0	0	0	0	0
New.CleanUp.ReferenceOTU147221	0	0	0	0	0	0	0	0	0	0	0	0	0	44	0	0	0	0	0	0	0	0	0	0	7	0	0	0	0	0	0	0	0	0	0	0	0	0	0	0	0	0	0	0	0	0	0	0	0
New.ReferenceOTU236	0	0	0	0	0	0	3	7	0	5	0	0	0	14	229	0	0	0	0	0	9	0	0	0	0	0	0	137	5	0	0	48	21	4	4	0	0	0	0	0	0	0	0	5	0	165	0	7	0
841965	0	0	0	0	0	0	0	0	0	0	0	0	0	0	0	0	0	0	0	0	0	0	0	0	0	0	0	0	0	0	0	0	0	0	0	0	0	0	0	0	0	0	0	0	0	0	0	0	0
New.ReferenceOTU249	0	0	0	0	0	0	0	0	0	0	0	0	0	0	0	0	0	0	0	0	0	0	0	0	0	0	0	0	0	0	0	0	0	0	0	0	0	0	0	0	0	0	0	0	0	0	0	0	0
859313	0	0	0	0	0	16	4	0	0	0	0	0	0	74	0	10	0	11	0	4	631	0	0	0	32	0	0	232	0	0	0	57	29	13	5	4	0	0	0	0	0	5	0	0	0	0	0	17	0
968464	0	0	0	0	0	9	0	0	0	0	0	0	0	3	0	0	0	0	0	0	6	0	0	0	7	0	0	122	0	0	0	13	53	0	7	0	0	0	0	0	0	0	0	0	0	0	0	0	0
New.ReferenceOTU1114	0	0	0	0	0	0	0	0	0	0	0	0	0	0	0	0	0	0	0	0	0	0	0	0	0	0	0	61	0	0	0	0	15	0	0	0	0	0	0	0	0	0	0	0	0	0	0	0	0
822095	0	3	0	0	0	0	0	0	0	0	0	0	0	0	0	0	0	0	0	0	0	0	0	0	0	6	0	0	0	0	0	0	0	0	0	0	0	0	0	0	0	0	0	0	0	0	0	0	0
341702	0	0	0	0	0	0	0	0	0	0	0	0	0	0	0	0	0	0	0	0	0	0	0	69	0	20	0	0	0	0	0	16	0	0	0	0	0	0	0	16	0	0	0	0	0	0	0	0	0
282746	0	0	0	0	0	0	0	0	0	0	0	0	0	0	0	0	0	0	0	0	0	0	0	0	0	0	0	0	0	0	0	7	0	0	0	0	0	0	0	0	0	0	0	0	0	0	0	0	0
316756	0	0	0	0	0	0	0	0	0	0	0	0	0	0	0	0	0	0	0	0	0	0	0	0	0	0	0	0	0	0	0	0	0	0	0	0	0	0	0	0	0	0	0	0	0	0	0	0	0
131516	0	0	0	0	0	0	0	0	0	0	0	0	0	0	5	0	0	0	0	0	0	0	0	0	0	0	0	4	0	0	0	3	0	0	0	0	0	0	0	0	0	0	0	0	0	6	0	0	0
New.ReferenceOTU694	0	0	0	0	0	0	0	0	0	0	0	0	0	0	0	0	0	0	0	0	0	0	0	0	0	0	0	0	0	0	0	0	0	0	0	0	0	0	0	0	0	0	0	0	0	0	0	0	0
312763	0	0	0	0	0	0	0	0	0	0	0	0	0	0	0	0	0	0	0	0	0	0	0	0	0	0	0	0	0	0	0	0	0	0	0	0	0	0	0	0	0	0	0	0	0	193	0	0	0
New.CleanUp.ReferenceOTU288489	0	0	0	0	0	0	0	0	0	0	0	0	0	0	0	0	0	0	0	0	0	0	0	0	0	0	0	0	0	0	0	0	0	0	0	0	0	0	0	0	0	0	0	0	0	0	0	0	0
New.CleanUp.ReferenceOTU14156	0	0	0	0	0	0	0	0	0	0	0	0	0	0	0	0	0	0	0	0	0	0	0	0	0	0	0	0	0	0	0	0	0	0	0	0	0	0	0	0	0	0	0	0	0	0	0	0	0
563192	0	0	0	0	0	0	0	0	0	0	0	0	0	0	0	0	0	0	0	0	0	0	0	4	0	0	0	0	0	0	0	0	0	0	0	0	0	0	0	0	0	0	0	0	0	0	0	0	0
New.ReferenceOTU607	0	0	0	0	0	0	0	0	0	0	0	0	0	0	0	0	0	0	0	0	0	0	0	0	0	0	0	0	0	0	0	5	0	0	0	0	0	0	0	0	0	0	0	0	0	0	0	3	0
1024739	0	0	0	0	0	0	0	0	0	0	0	0	0	0	0	0	0	0	0	0	0	0	0	4	0	0	0	0	0	0	0	0	4	0	0	0	0	0	0	0	0	0	0	0	0	0	0	0	0
344320	0	0	0	0	0	0	0	0	0	0	0	0	0	0	0	0	0	0	0	0	0	0	0	0	0	4	0	0	0	0	0	0	0	0	0	0	0	0	0	0	0	0	0	0	0	0	0	0	0
New.CleanUp.ReferenceOTU124594	0	0	0	0	0	0	0	0	0	0	0	0	0	0	0	0	0	0	0	0	0	0	0	0	0	0	0	0	0	0	0	3	0	0	0	0	0	0	0	0	0	0	0	0	0	0	0	0	0
260261	0	0	0	0	0	0	0	0	0	0	0	0	0	0	0	0	3	0	0	0	0	0	0	0	10	0	0	22	0	0	0	13	4	4	0	0	0	0	0	0	0	0	0	0	0	0	0	6	3
578750	0	0	0	0	0	0	0	0	0	0	0	0	0	0	0	0	0	0	0	0	0	0	0	0	0	0	0	0	0	0	0	0	0	0	0	0	0	0	0	0	0	0	0	0	0	0	0	0	0
859157	0	0	0	0	0	0	0	0	0	0	0	0	0	0	0	0	0	0	0	0	0	0	0	0	0	0	0	0	0	0	0	0	0	0	0	0	0	0	0	0	0	0	0	0	0	0	0	0	0
1011476	0	0	0	0	0	0	0	0	0	0	0	0	0	0	0	0	0	0	0	0	0	0	0	0	0	0	0	0	0	0	0	0	0	0	0	0	0	0	0	0	0	0	0	0	0	0	0	0	0
New.CleanUp.ReferenceOTU60413	0	0	0	0	0	0	0	0	0	0	0	0	0	0	0	0	0	0	0	0	0	0	0	0	4	0	0	15	0	0	0	6	3	8	0	0	0	0	0	0	0	0	0	3	0	0	0	0	0
4308655	0	0	0	0	0	0	0	0	0	0	0	0	0	0	0	0	0	0	0	0	0	0	0	0	0	0	0	4	0	0	0	0	0	0	0	0	0	0	0	0	0	0	0	0	0	0	0	0	0
904212	0	0	0	0	0	0	0	0	0	0	0	0	0	0	0	0	0	0	0	0	0	0	0	0	0	0	0	0	0	0	0	0	0	0	0	0	0	0	0	0	0	0	0	0	0	0	0	0	0
1012668	0	0	0	0	0	0	0	0	0	0	0	0	0	0	0	0	0	0	0	0	0	0	0	0	0	0	0	0	0	0	0	0	0	0	0	0	0	0	0	0	0	0	0	0	0	0	0	0	0
New.ReferenceOTU815	0	0	0	0	0	0	0	0	0	0	0	0	0	0	0	0	0	0	0	0	0	0	0	0	0	0	0	0	0	0	0	0	0	0	0	0	0	0	0	0	0	0	0	0	0	0	0	0	0
256498	0	0	0	0	0	0	0	0	0	0	0	0	0	0	0	0	0	0	0	0	0	0	0	0	0	0	0	0	0	0	0	0	0	0	0	0	0	0	0	0	0	0	0	0	0	0	0	0	0
New.CleanUp.ReferenceOTU291330	0	0	0	0	0	0	0	0	0	0	0	0	0	0	0	0	0	0	0	0	0	0	0	0	0	0	0	0	0	0	0	0	0	0	0	0	0	0	0	0	0	0	0	0	0	0	0	0	0
New.CleanUp.ReferenceOTU188529	0	0	0	0	0	0	0	0	0	0	0	0	0	0	0	0	0	0	0	0	0	0	0	0	0	0	0	0	0	0	0	0	0	0	0	0	0	0	0	0	0	0	0	0	0	0	0	0	0
941639	0	0	0	0	0	0	0	0	0	0	0	0	0	0	0	0	0	0	0	0	0	0	0	0	0	0	0	0	0	0	0	0	0	0	0	0	0	0	0	0	0	0	0	0	0	0	0	0	0
529793	0	0	0	0	0	0	0	0	0	0	0	0	0	0	0	0	0	0	0	0	0	0	0	0	0	0	0	0	0	0	0	0	0	0	0	0	0	0	0	0	0	0	0	0	0	0	0	0	0
New.CleanUp.ReferenceOTU190971	0	0	0	0	0	0	0	0	0	0	0	0	0	0	0	0	0	0	0	0	0	0	0	0	0	0	0	0	0	0	0	0	0	0	0	0	0	0	0	0	0	0	0	0	0	0	0	0	0
New.CleanUp.ReferenceOTU109031	0	0	0	0	0	0	0	0	0	0	0	0	0	22	0	0	0	0	0	0	0	0	0	0	0	0	0	0	0	0	0	0	0	0	0	0	0	0	0	0	0	0	0	0	0	0	0	0	0
93175	0	0	0	0	0	0	0	0	0	0	0	0	0	0	0	0	0	0	0	0	0	0	0	0	0	0	0	0	0	0	0	0	0	0	0	0	0	0	0	0	0	0	0	0	0	0	0	0	0
591444	0	0	9	0	0	0	0	0	0	5	0	0	0	0	19	0	0	0	4	0	0	0	0	0	0	0	0	7	0	0	0	0	0	3	3	7	0	0	0	0	0	0	0	0	0	0	0	0	0
901984	0	0	0	0	0	0	0	0	0	0	0	0	0	0	0	0	0	0	0	0	0	0	0	0	0	0	0	0	0	0	0	0	0	7	0	0	0	0	0	0	0	0	0	3	0	0	0	0	0
New.ReferenceOTU976	0	0	0	0	0	0	0	0	0	0	0	0	0	0	0	0	0	0	0	0	0	0	0	0	0	0	0	0	0	0	0	0	0	0	0	0	0	0	0	0	0	0	0	0	0	0	0	0	0
788779	0	4	0	0	0	0	0	0	0	0	0	0	0	0	0	0	0	0	0	0	0	0	0	0	0	0	0	87	0	0	0	0	0	0	0	0	0	0	0	0	0	0	0	0	0	0	0	0	0
331048	0	0	0	0	0	0	0	0	0	0	0	0	0	0	0	0	0	0	0	0	0	0	0	0	0	0	0	0	0	0	0	0	0	0	0	0	0	0	0	0	0	0	0	3	0	0	0	0	0
New.CleanUp.ReferenceOTU262064	0	0	0	0	0	0	0	0	0	0	0	0	0	0	0	0	0	0	0	0	0	0	0	0	0	0	0	0	0	0	0	0	0	0	0	0	0	0	0	0	0	0	0	0	0	0	0	0	0
769227	0	0	0	0	0	0	0	0	0	0	4	0	0	0	0	7	0	0	0	0	0	5	0	0	24	0	0	0	0	0	0	0	0	14	0	0	0	0	0	0	0	0	0	5	0	0	3	0	0
New.CleanUp.ReferenceOTU238739	0	0	0	0	0	0	0	0	0	0	0	0	0	0	0	0	0	0	0	0	0	0	0	0	0	0	0	0	0	0	0	0	0	0	0	0	0	0	0	0	0	0	0	0	0	0	0	0	0
New.CleanUp.ReferenceOTU148115	0	0	0	0	0	0	0	0	0	0	0	0	0	0	0	0	0	0	0	0	0	0	0	0	6	0	0	0	0	0	0	0	0	11	0	0	0	0	0	0	0	0	0	0	0	0	0	0	0
410072	0	0	0	0	0	0	0	0	0	0	0	0	0	0	0	0	0	0	0	0	0	0	0	0	0	0	0	0	0	0	0	10	0	0	0	0	0	0	0	0	0	0	0	0	0	0	0	3	0
New.CleanUp.ReferenceOTU187525	0	0	0	0	0	0	0	4	0	0	0	0	0	0	0	5	0	0	0	0	0	0	0	0	0	0	0	0	0	0	5	0	0	11	0	0	0	0	0	0	0	0	0	0	0	0	7	0	0
New.CleanUp.ReferenceOTU233812	0	4	0	0	0	0	0	0	0	3	0	0	0	0	0	0	0	0	0	0	0	0	0	0	0	11	0	61	0	0	0	0	0	0	4	6	0	0	0	0	0	0	0	0	0	0	0	0	0
589247	0	0	0	0	0	0	0	0	0	0	0	0	0	0	0	0	0	0	0	0	0	0	0	0	0	0	0	95	0	0	0	12	0	0	0	0	0	0	0	0	0	0	0	0	0	0	0	0	0
575324	0	0	0	0	0	0	0	0	0	0	0	0	0	0	0	0	0	0	0	0	0	0	0	0	0	0	0	0	0	0	0	0	0	0	0	0	0	0	0	0	0	0	0	0	0	0	0	0	0
New.ReferenceOTU1147	0	0	0	0	0	0	0	0	0	5	0	0	0	0	0	20	0	12	0	0	0	0	4	0	6	0	0	39	0	0	0	8	20	38	0	0	0	0	0	0	0	0	0	0	0	0	0	5	0
New.ReferenceOTU1019	0	0	0	0	0	0	0	0	0	0	0	0	0	0	0	0	0	0	0	0	0	0	0	0	27	0	0	0	0	0	0	0	0	5	0	0	0	0	0	0	0	0	0	0	0	0	3	3	0
330721	0	0	0	0	0	0	0	0	0	0	0	0	0	0	0	0	0	0	0	0	0	0	0	0	0	0	0	41	0	0	0	9	0	0	0	0	0	0	0	0	0	0	0	0	0	0	0	0	0
901893	0	0	0	0	0	0	0	0	0	0	0	0	0	0	0	0	0	0	0	0	0	0	0	0	0	0	0	0	0	0	0	8	0	0	0	0	0	0	0	0	0	0	0	0	0	0	0	0	0
New.CleanUp.ReferenceOTU43272	0	0	0	0	0	0	0	0	0	0	0	0	0	0	0	0	0	0	0	0	0	0	0	0	0	0	0	0	0	0	0	0	0	0	0	0	0	0	0	0	0	0	0	0	0	0	0	0	0
New.CleanUp.ReferenceOTU22399	0	0	0	0	0	0	0	0	0	0	0	0	0	0	0	0	0	0	0	0	0	0	0	0	0	0	0	0	0	0	0	0	0	0	0	0	0	0	0	0	0	0	0	0	0	0	0	0	0
562912	0	0	0	0	0	0	0	0	0	0	0	0	0	0	0	0	0	0	0	0	0	0	0	0	0	0	0	0	0	0	0	0	0	0	0	0	0	0	0	0	0	0	0	0	0	0	0	0	0
New.CleanUp.ReferenceOTU337910	0	0	0	0	0	0	0	0	0	0	0	0	0	0	0	0	0	0	0	0	0	0	0	0	0	0	0	0	0	0	0	0	0	0	0	0	0	0	0	0	0	0	0	0	0	0	0	0	0
New.ReferenceOTU927	52	0	0	0	0	0	0	0	86	0	0	0	0	1892	213	14	0	8	0	0	6258	4	0	223	66	0	4	0	0	0	38	28	3	78	0	0	0	0	0	0	0	0	0	16	0	0	4	8	0
905076	0	0	0	0	0	0	0	0	0	0	0	0	0	0	0	0	0	0	0	0	0	0	0	0	0	0	0	0	0	0	0	0	0	0	0	0	0	0	0	0	0	0	0	0	0	86	0	3	0
New.ReferenceOTU460	0	0	0	0	0	0	0	0	0	0	0	0	0	0	0	9	0	0	0	0	0	7	0	17	31	0	3	0	0	4	0	0	0	14	0	0	0	0	0	0	0	0	0	17	0	0	5	0	0
585063	13	0	0	0	0	0	0	0	0	0	0	0	0	577	0	0	0	0	0	0	1624	3	0	0	19	0	0	0	0	0	20	0	0	19	0	0	0	0	0	0	0	0	0	5	0	0	3	0	0
1034378	0	0	0	0	0	0	0	0	0	0	0	0	0	0	0	0	0	0	0	0	0	0	0	0	4	0	0	0	0	0	0	0	0	3	0	0	0	0	0	0	0	0	0	0	0	0	0	0	0
287021	0	0	0	0	0	0	0	0	0	0	0	0	0	0	0	0	0	0	0	0	0	0	0	0	0	0	0	0	0	0	0	0	0	0	0	0	0	0	0	0	0	0	0	0	0	0	0	0	0
New.ReferenceOTU430	0	0	0	0	0	0	0	0	0	0	0	0	0	0	0	0	0	0	0	0	0	0	0	0	3	0	0	0	0	0	0	0	6	0	0	0	0	0	0	0	0	0	0	0	0	0	0	0	0
552685	0	0	0	0	0	0	0	0	0	0	0	0	0	0	0	0	0	0	0	0	0	0	0	0	0	0	0	0	0	0	0	0	0	0	0	0	0	0	0	0	0	0	0	0	0	0	0	0	0
New.ReferenceOTU1028	0	0	0	0	0	0	0	0	0	0	0	0	0	53	0	0	0	0	0	0	0	0	0	0	13	0	0	0	0	0	0	0	0	9	0	0	0	0	0	0	0	0	0	3	0	0	0	0	0
1072854	0	0	0	0	0	0	0	0	0	0	0	0	0	0	0	0	0	0	0	0	0	0	0	0	0	0	0	63	0	0	0	0	0	0	0	0	0	3	0	0	0	0	0	0	0	0	0	0	0
3198356	4	0	0	0	0	0	3	0	25	0	0	0	0	0	0	0	0	0	0	0	0	4	0	0	61	0	0	0	0	0	35	0	0	48	0	0	0	0	0	0	0	0	0	8	0	0	0	0	0
New.ReferenceOTU267	0	0	0	0	0	0	0	0	0	0	0	0	0	0	0	0	0	0	0	0	0	0	0	0	0	0	0	675	0	0	0	131	0	0	0	0	0	0	0	0	0	0	0	0	0	0	0	0	7
New.CleanUp.ReferenceOTU110094	0	0	0	0	0	0	0	0	0	0	0	0	0	0	0	0	0	0	0	0	0	0	0	0	0	0	0	0	0	0	0	0	0	0	0	0	0	0	0	0	0	0	0	0	0	0	0	0	0
1040401	0	0	0	0	0	0	0	0	0	0	0	0	0	0	0	0	0	0	0	0	0	0	0	0	0	0	0	0	0	0	0	0	0	0	0	0	0	0	0	0	0	0	0	0	0	0	0	0	0
New.ReferenceOTU533	0	0	0	0	0	0	0	0	0	0	0	0	0	0	0	0	0	0	0	0	0	0	0	0	0	0	0	0	0	0	0	0	0	0	0	0	0	0	0	0	0	0	0	0	0	0	0	0	0
New.CleanUp.ReferenceOTU228117	0	0	0	0	0	0	0	0	0	0	0	0	0	0	0	0	0	0	0	0	0	0	0	0	0	0	0	0	0	0	0	0	0	0	0	0	0	0	0	0	0	0	0	0	0	0	0	0	0
New.CleanUp.ReferenceOTU225115	0	0	0	0	0	0	0	0	0	0	0	0	0	0	0	0	0	0	0	0	0	0	0	0	0	0	0	0	0	0	0	0	0	0	0	0	0	0	0	0	0	0	0	0	0	0	0	0	0
New.CleanUp.ReferenceOTU261217	0	0	0	0	0	0	0	0	0	0	0	0	0	56	0	0	0	0	0	0	79	0	0	0	0	0	0	0	0	0	0	0	0	0	0	0	0	0	0	0	0	0	0	0	0	0	0	0	0
568643	0	0	0	0	0	0	0	0	0	0	0	0	0	0	0	0	0	0	0	0	0	0	0	0	0	0	0	0	0	0	0	0	0	0	0	0	0	0	0	0	0	0	0	0	0	0	0	0	0
2773722	0	0	0	0	0	0	0	0	0	0	0	0	0	0	0	0	0	0	0	0	0	0	0	0	0	0	0	0	0	0	0	0	0	0	0	0	0	0	0	0	0	0	0	0	0	0	0	0	0
11449	0	0	0	0	0	0	0	0	0	0	0	0	0	0	0	0	0	0	0	0	0	0	0	0	0	0	0	0	0	0	0	0	0	0	0	0	0	0	0	0	0	0	0	0	0	0	0	0	0
726414	0	0	0	0	0	0	0	0	0	0	0	0	0	0	0	0	0	0	0	0	0	0	0	0	0	0	0	0	0	0	0	0	0	0	0	0	0	0	0	0	0	0	0	0	0	0	0	0	0
New.CleanUp.ReferenceOTU202907	0	0	0	0	0	0	0	0	0	0	0	0	0	0	0	0	0	0	0	0	0	0	0	0	0	0	0	0	0	0	0	0	0	0	0	0	0	0	0	0	0	0	0	0	0	0	0	0	0
New.CleanUp.ReferenceOTU216752	0	0	0	0	0	0	0	0	0	0	0	0	0	0	0	0	0	0	0	0	0	0	0	0	0	0	0	0	0	0	0	0	0	0	0	0	0	0	0	0	0	0	0	0	0	0	0	0	0
New.ReferenceOTU1040	0	0	0	0	0	0	0	0	0	0	0	0	0	0	0	0	0	0	0	0	0	0	0	0	0	0	0	0	0	0	0	0	0	0	0	0	0	0	0	0	0	0	0	0	0	0	0	0	0
New.CleanUp.ReferenceOTU321417	0	0	0	0	0	0	0	0	0	0	0	0	0	0	0	0	0	0	0	0	0	0	0	0	0	0	0	0	0	0	0	0	0	0	0	0	0	0	0	0	0	0	0	0	0	0	0	0	0
New.CleanUp.ReferenceOTU248071	0	0	0	0	0	0	0	0	0	0	0	0	0	0	0	0	0	0	0	0	0	0	0	0	0	0	0	0	0	0	0	0	0	0	0	0	0	0	0	0	0	0	0	0	0	0	0	0	0
759855	0	0	0	0	0	0	0	0	0	0	0	0	0	7	0	0	0	0	0	0	16	0	0	0	0	0	0	0	0	0	0	0	0	3	0	0	0	0	0	0	0	0	0	0	0	0	0	0	0
581541	0	0	0	0	0	0	0	0	0	0	0	0	0	0	0	0	0	0	0	0	0	0	0	0	0	0	0	0	0	0	0	0	0	0	0	0	0	0	0	0	0	0	0	0	0	0	0	0	0
New.CleanUp.ReferenceOTU311045	0	0	0	0	0	0	0	0	0	0	0	0	0	0	0	0	0	0	0	0	0	0	0	0	0	0	0	0	0	0	0	0	0	0	0	0	0	0	0	0	0	0	0	0	0	0	0	0	0
576231	0	0	0	0	0	0	0	0	0	0	0	0	0	0	0	0	0	0	0	0	0	0	0	0	0	0	0	0	0	0	0	0	0	0	0	0	0	0	0	0	0	0	0	0	0	0	0	0	0
New.CleanUp.ReferenceOTU15330	0	0	0	0	0	0	0	0	0	0	0	0	0	0	0	0	0	0	0	0	0	0	0	0	0	0	0	0	0	0	0	0	0	0	0	0	0	0	0	0	0	0	0	0	0	0	0	0	0
146122	0	0	0	0	0	0	0	0	0	0	0	0	0	0	0	0	0	0	0	0	0	0	0	0	0	0	0	0	0	0	0	0	0	0	0	0	0	0	0	0	0	0	0	0	0	0	0	0	0
823732	0	0	0	0	0	0	0	0	0	0	0	0	0	0	0	0	0	0	0	0	0	0	0	0	0	0	0	0	0	0	0	0	0	0	0	0	0	0	0	0	0	0	0	0	0	0	0	0	0
311619	0	0	0	0	0	0	0	0	0	0	0	0	0	0	0	0	0	0	0	0	0	0	0	0	0	0	0	0	0	0	0	0	0	0	0	0	0	0	0	0	0	0	0	0	0	0	0	0	0
339654	0	0	0	0	0	0	0	0	0	0	0	0	0	0	0	0	0	0	0	0	0	0	0	0	0	0	0	0	0	0	0	0	0	0	0	0	0	0	0	0	0	0	0	0	0	0	0	0	0
307760	0	0	0	0	0	0	0	0	0	0	0	0	0	0	0	0	0	0	0	0	0	0	0	0	0	0	0	0	0	0	0	0	0	0	0	0	0	0	0	0	0	0	0	0	0	0	0	0	0
1045843	0	0	0	0	0	0	0	0	0	0	0	0	0	0	0	0	0	0	124	0	0	0	0	0	0	0	0	0	0	0	0	0	0	0	0	0	0	0	0	0	0	0	0	0	0	0	0	0	0
914235	3	0	0	0	0	0	0	0	0	0	0	0	0	0	0	0	0	0	0	0	0	0	0	0	0	0	0	0	0	0	0	0	0	0	0	0	0	0	0	0	0	0	0	0	0	0	0	0	0
4398116	0	0	0	0	0	0	0	0	0	0	0	0	0	0	0	0	0	0	0	0	0	0	0	0	0	0	0	0	0	0	0	0	0	0	0	0	0	0	0	0	0	0	0	0	0	0	0	0	0
4339987	0	0	0	0	0	0	0	0	0	0	0	0	0	0	0	0	0	0	0	0	0	0	0	0	0	0	0	0	0	0	0	0	0	0	0	0	0	0	0	0	0	0	0	0	0	0	0	0	0
732609	0	0	0	0	0	0	0	0	0	0	0	0	0	0	0	0	0	0	0	0	0	0	0	0	0	0	0	0	0	0	0	0	0	0	0	0	0	0	0	0	0	0	0	0	0	0	0	0	0
244196	0	0	0	0	0	0	0	0	0	0	0	0	0	0	0	0	0	0	0	0	0	0	0	0	0	0	0	0	0	0	0	0	0	0	0	0	0	0	0	0	0	0	0	0	0	0	0	0	0
582047	0	0	0	0	0	0	0	0	0	0	0	0	0	0	0	0	0	0	0	0	0	0	0	0	0	0	0	0	0	0	0	0	0	0	0	0	0	0	0	0	0	0	0	0	0	0	0	0	0
1040713	0	0	0	0	0	0	0	0	0	0	0	0	0	0	0	0	0	0	0	0	0	0	0	0	0	0	0	0	0	0	0	0	0	0	0	0	0	0	0	0	0	0	0	0	0	0	0	0	0
446403	0	0	0	0	0	0	0	0	0	0	0	0	0	0	0	0	0	0	0	0	0	0	0	0	0	0	0	0	0	0	0	0	0	0	0	0	0	0	0	0	0	0	0	0	0	0	0	0	0
1096010	0	0	0	0	0	0	0	0	0	0	0	0	0	0	0	0	0	0	0	0	0	0	0	0	0	0	0	0	0	0	0	0	0	0	0	0	0	0	0	0	0	0	0	0	0	0	0	0	0
300811	0	0	0	0	0	0	0	0	0	0	0	0	0	0	0	0	0	0	0	0	0	0	0	0	0	0	0	0	0	0	0	0	0	0	0	0	0	0	0	0	0	0	0	0	0	0	0	0	0
4458619	0	0	0	0	0	0	0	0	0	0	0	0	0	0	0	0	0	0	0	0	0	0	0	0	0	0	0	0	0	0	0	0	0	0	0	0	0	0	0	0	0	0	0	0	0	0	0	0	0
New.CleanUp.ReferenceOTU331892	0	0	0	0	0	0	0	0	0	0	0	0	0	0	0	0	0	0	0	0	0	0	0	0	0	0	0	0	0	0	0	0	0	0	0	0	0	0	0	0	0	0	0	0	0	0	0	0	0
885496	0	0	0	0	0	0	0	0	0	0	0	0	0	0	0	0	0	0	0	0	0	0	0	0	0	0	0	0	0	0	0	0	0	6	0	0	0	0	0	0	0	0	0	0	0	0	0	0	0
New.CleanUp.ReferenceOTU76320	0	0	0	0	0	0	0	0	0	0	0	0	0	0	0	0	0	0	0	0	0	0	0	0	0	0	0	0	0	0	0	0	0	0	0	0	0	0	0	0	0	0	0	0	0	0	0	0	0
82683	0	0	0	0	0	0	0	0	0	0	0	0	0	0	0	0	0	0	0	0	0	0	0	0	0	0	0	0	0	0	0	0	0	0	0	0	0	0	0	0	0	0	0	0	0	0	0	0	0
New.CleanUp.ReferenceOTU335892	0	0	0	0	0	0	0	0	0	0	0	0	0	0	0	0	0	0	0	0	0	0	0	0	0	0	0	0	0	0	0	0	0	0	0	0	0	0	0	0	0	0	0	0	0	0	0	0	0
261123	0	0	0	0	0	0	0	0	0	0	0	0	0	0	0	0	0	0	0	0	0	0	0	0	0	0	0	0	0	0	0	0	0	0	0	0	0	0	0	0	0	0	0	0	0	0	0	0	0
1108350	0	0	0	0	0	0	0	0	0	0	0	0	0	0	0	0	0	0	0	0	0	0	0	0	0	0	0	0	0	0	0	0	0	0	0	3	0	0	0	0	0	0	0	0	0	0	0	0	0
639712	0	0	0	0	0	0	0	0	13	0	0	0	0	5	0	0	0	0	0	0	0	0	0	0	0	0	0	0	0	0	0	0	0	3	0	0	0	0	0	0	0	0	0	0	0	0	0	0	0
New.CleanUp.ReferenceOTU64846	0	0	0	0	0	0	0	0	0	0	0	0	0	0	0	0	0	0	0	0	0	0	0	0	0	0	0	0	0	0	0	0	0	0	0	0	0	0	0	0	0	0	0	0	0	0	0	0	0
4442910	0	0	0	0	0	0	0	0	0	0	0	0	0	0	0	0	0	0	0	0	0	0	0	0	0	0	0	0	0	0	0	0	0	0	0	0	0	0	0	0	0	0	0	0	0	0	0	0	0
New.CleanUp.ReferenceOTU238826	0	0	0	0	0	0	0	0	0	0	0	0	0	0	0	0	0	0	0	0	0	0	0	0	0	0	0	0	0	0	0	0	0	0	0	0	0	0	0	0	0	0	0	0	0	0	0	0	0
572032	0	0	0	0	0	0	0	0	0	0	0	0	0	0	0	0	0	0	0	0	0	0	0	0	0	0	0	0	0	0	0	0	0	0	0	0	0	0	0	0	0	0	0	0	0	0	0	0	0
223787	0	0	0	0	0	0	0	0	0	0	0	0	0	0	0	0	0	0	0	0	0	0	0	0	0	0	0	0	0	0	0	0	0	0	0	0	0	0	0	0	0	0	0	0	0	0	0	0	0
286579	0	0	0	0	0	0	0	0	0	0	0	0	0	0	0	0	0	0	0	0	0	0	0	0	0	0	0	0	0	0	0	0	0	0	0	0	0	0	0	0	0	0	0	0	0	0	0	0	0
898468	0	0	0	0	0	0	0	0	0	0	0	0	0	0	0	0	0	0	0	0	0	0	0	0	0	0	0	0	0	0	0	0	0	0	0	0	0	0	0	0	0	0	0	0	0	0	0	0	0
810402	0	0	0	0	0	0	0	0	0	0	0	0	0	0	0	0	0	0	0	0	0	0	0	0	0	0	0	0	0	0	0	0	0	0	0	0	0	0	0	0	0	0	0	0	0	0	0	0	0
739867	0	0	0	0	0	0	0	0	0	0	0	0	0	0	0	0	0	0	0	0	0	0	0	0	0	0	0	0	0	0	0	0	0	0	0	0	0	0	0	0	0	0	0	0	0	0	0	0	0
New.CleanUp.ReferenceOTU16526	0	0	0	0	0	0	0	0	0	0	0	0	0	0	0	0	0	0	0	0	0	0	0	0	0	0	0	0	0	0	0	0	0	0	0	0	0	0	0	0	0	0	0	0	0	0	0	0	0
812902	0	0	0	0	0	0	0	0	0	0	0	0	0	0	0	0	0	0	0	0	0	0	0	0	0	0	0	0	0	0	0	0	0	0	0	0	0	0	0	0	0	0	0	0	0	0	0	0	0
1002005	0	17	0	0	0	0	0	0	0	0	0	0	0	0	0	0	0	0	0	0	0	0	0	0	0	0	0	0	0	0	0	0	0	0	0	0	0	0	0	54	0	0	0	0	0	0	0	0	0
1101451	0	0	0	0	0	0	0	0	0	0	0	0	0	22	0	0	0	0	0	0	0	0	0	18	7	0	0	0	0	0	0	0	0	0	0	0	0	0	0	0	0	0	0	0	0	0	0	0	0
929901	0	0	0	0	0	0	0	0	0	0	0	0	0	34	0	0	0	0	0	0	0	0	0	0	0	0	0	0	0	0	0	0	0	0	0	0	0	0	0	0	0	0	0	0	0	0	0	0	0
845354	3	0	0	0	0	0	0	0	0	0	0	0	0	0	0	0	0	0	0	0	0	0	0	0	0	0	0	0	0	0	0	0	0	0	0	0	0	0	0	0	0	0	0	0	0	0	0	0	0
449855	0	0	0	0	0	0	0	0	0	0	0	0	0	0	0	0	0	0	0	0	0	0	0	0	0	0	0	0	0	0	0	0	0	0	0	0	0	0	0	0	0	0	0	0	0	0	0	0	0
112057	0	0	0	0	0	0	0	0	0	0	0	0	0	0	0	0	0	0	106	0	0	0	0	0	0	0	0	0	0	0	0	0	0	0	0	0	0	0	0	0	0	0	0	0	0	0	0	0	0
774718	0	0	0	0	0	0	0	0	0	0	0	0	0	0	0	0	0	0	0	0	0	0	0	0	0	0	0	0	0	0	0	0	0	0	0	0	0	0	0	0	0	0	0	0	0	0	0	0	0
2651333	0	0	0	0	0	0	0	0	0	0	0	0	0	0	0	0	0	0	0	0	0	0	0	0	0	0	0	0	0	0	0	0	0	0	0	3	0	0	0	0	0	0	0	0	0	0	0	0	0
1062748	0	0	0	0	0	0	0	0	0	0	0	0	0	0	0	0	0	0	0	0	0	0	5	0	0	0	0	0	0	0	0	0	0	0	0	0	0	0	0	0	0	0	0	0	0	0	0	0	0
New.ReferenceOTU35	0	0	0	0	0	0	0	0	0	0	0	0	0	0	0	0	0	0	0	0	0	0	0	0	5	0	0	0	0	0	0	0	0	0	0	0	0	0	0	0	0	0	0	11	0	0	0	0	0
New.CleanUp.ReferenceOTU22502	0	0	0	0	0	0	0	0	0	0	0	0	0	0	0	0	0	0	0	0	0	0	0	0	0	0	0	0	0	0	0	0	0	0	0	0	0	0	0	0	0	0	0	0	0	0	0	0	0
202331	0	0	0	0	0	0	0	0	0	0	0	0	0	0	0	0	0	0	0	0	0	0	0	0	0	0	0	0	0	0	0	0	0	0	0	0	0	0	0	0	0	0	0	0	0	0	0	0	0
37747	0	6	0	0	0	4	0	0	30	0	0	0	0	0	0	10	0	7	0	0	0	10	0	0	15	0	3	32	0	7	12	0	20	9	0	0	0	0	0	0	0	3	0	17	4	0	6	0	0
New.CleanUp.ReferenceOTU113074	0	0	0	0	0	0	0	0	0	0	0	0	0	0	0	0	0	0	0	0	0	0	0	0	0	0	0	0	0	0	0	0	0	0	0	0	0	0	0	0	0	0	0	0	0	0	0	0	0
New.CleanUp.ReferenceOTU10797	0	0	0	0	0	0	0	0	0	0	0	0	0	0	0	0	0	0	0	0	0	0	0	0	0	0	0	0	0	0	0	0	0	0	0	0	0	0	0	0	0	0	0	0	0	0	0	0	0
New.CleanUp.ReferenceOTU125242	0	0	0	0	0	0	0	0	0	0	0	0	0	0	0	0	0	0	0	0	0	0	0	0	0	0	0	0	0	0	0	0	0	0	0	0	0	0	0	0	0	0	0	0	0	0	0	0	0
New.ReferenceOTU569	0	0	0	0	0	0	0	0	0	0	0	0	0	0	0	0	0	0	0	0	0	0	0	0	0	0	0	0	0	0	0	0	0	0	0	0	0	0	0	0	0	0	0	0	0	0	0	3	0
39735	0	0	0	0	0	0	0	0	0	0	0	0	0	0	0	0	0	0	0	0	0	0	0	0	0	0	0	0	0	0	0	0	0	0	0	0	0	0	0	0	0	0	0	0	0	0	0	0	0
New.CleanUp.ReferenceOTU298465	0	0	0	0	0	0	0	0	0	0	0	0	0	0	0	0	0	0	0	0	0	0	0	0	0	0	0	0	0	0	0	0	0	0	0	0	0	0	0	0	0	0	0	0	0	0	0	0	0
918840	0	0	0	0	0	0	0	0	0	0	0	0	0	0	0	0	0	0	0	0	0	0	0	0	0	0	0	0	0	0	0	0	0	0	0	0	0	0	0	0	0	0	0	0	0	0	0	0	0
New.CleanUp.ReferenceOTU311295	0	0	0	0	0	0	0	0	0	0	0	0	0	0	0	0	0	0	0	0	0	0	0	0	0	0	0	0	0	0	0	0	0	0	0	0	0	0	0	0	0	0	0	0	0	0	0	0	0
1082846	0	0	0	0	0	0	0	0	0	0	0	0	0	0	0	0	0	0	0	0	0	0	0	0	0	0	0	0	0	0	0	0	0	0	0	0	0	0	0	0	0	0	0	0	0	0	0	0	0
New.CleanUp.ReferenceOTU114574	0	0	0	0	0	0	0	0	0	0	0	0	0	0	0	0	0	0	0	0	0	0	0	0	0	0	0	0	0	0	0	0	0	0	0	0	0	0	0	0	0	0	0	0	0	0	0	0	0
New.CleanUp.ReferenceOTU340116	0	0	0	0	0	0	0	0	0	0	0	0	0	0	0	0	0	0	0	0	0	0	0	0	0	0	0	0	0	0	0	0	10	0	0	0	0	0	0	0	0	0	0	0	0	0	0	0	0
New.CleanUp.ReferenceOTU9237	0	0	0	0	0	0	0	0	0	0	0	0	0	0	0	0	0	0	0	0	0	0	0	0	0	0	0	0	0	0	0	0	0	0	0	0	0	0	0	0	0	0	0	0	0	0	0	0	0
239057	0	0	0	0	0	0	0	0	0	0	0	0	0	0	0	0	0	0	0	0	0	0	0	0	0	0	0	0	0	0	0	0	0	0	0	0	0	0	0	0	0	0	0	0	0	0	0	0	0
4393061	0	0	0	0	0	0	0	0	0	0	0	0	0	0	0	0	0	0	0	0	0	0	0	0	0	0	0	0	0	0	0	0	0	0	0	0	0	0	0	0	0	0	0	0	0	0	0	0	0
New.CleanUp.ReferenceOTU357920	0	0	0	0	0	0	0	0	0	0	0	0	0	0	0	0	0	0	0	0	0	0	0	0	0	0	0	0	0	0	0	0	0	0	0	0	0	0	0	0	0	0	0	0	0	0	0	0	0
New.ReferenceOTU856	0	0	0	0	0	0	0	0	0	0	0	0	0	0	0	0	0	0	0	0	0	0	0	0	0	0	0	0	0	0	0	0	0	0	0	0	0	0	0	0	0	0	0	0	0	0	0	0	0
4479944	0	3	0	0	0	0	0	0	0	3	0	0	0	0	0	0	0	0	0	0	0	0	0	0	0	0	0	0	0	0	0	0	0	0	0	0	0	0	0	0	0	0	0	0	0	0	0	0	0
224648	0	0	0	0	0	0	0	0	0	0	0	0	0	0	0	0	0	0	0	0	0	0	0	0	0	0	0	0	0	0	0	0	0	0	0	0	0	0	0	0	0	0	0	0	0	0	0	0	0
New.CleanUp.ReferenceOTU104774	0	0	0	0	0	0	0	0	0	0	0	0	0	0	0	0	0	0	0	0	0	0	0	0	0	0	0	0	0	0	0	0	0	0	0	0	0	0	0	0	0	0	0	0	0	0	0	0	0
New.CleanUp.ReferenceOTU345488	0	0	0	0	0	0	0	0	0	0	0	0	0	0	0	0	0	0	0	0	0	0	0	0	0	0	0	0	0	0	0	0	0	0	0	0	0	0	0	0	0	0	0	0	0	0	0	0	0
New.CleanUp.ReferenceOTU315580	0	0	0	0	0	0	0	0	0	0	0	0	0	0	0	0	0	0	0	0	0	0	0	0	0	0	0	0	0	0	0	8	0	0	0	0	0	0	0	0	0	0	0	0	0	0	0	0	0
4437557	0	0	0	0	0	0	0	0	0	0	0	0	0	0	0	0	0	0	0	0	0	0	0	0	0	0	0	0	0	0	0	0	0	0	0	0	0	0	0	0	0	0	0	0	0	0	0	0	0
555635	0	0	0	0	0	0	0	0	0	0	0	0	0	0	0	0	0	0	0	0	0	0	0	0	0	0	0	0	0	0	0	0	0	0	0	0	0	0	0	0	0	0	0	0	0	0	0	0	0
New.CleanUp.ReferenceOTU331836	0	0	0	0	0	0	0	0	0	0	0	0	0	0	0	0	0	0	0	0	0	0	0	0	0	0	0	0	0	0	0	0	0	0	0	0	0	0	0	0	0	0	0	0	0	0	0	0	0
New.CleanUp.ReferenceOTU32946	0	0	0	0	0	0	0	0	0	0	0	0	0	0	0	0	0	0	0	0	0	0	0	0	0	0	0	0	0	0	0	0	0	0	0	0	0	0	0	0	0	0	0	0	0	0	0	0	0
315149	0	0	0	0	0	0	0	0	0	0	0	0	0	0	0	0	0	0	0	0	0	0	0	0	0	0	0	0	0	0	0	4	0	0	0	0	0	0	0	0	0	0	0	0	0	0	0	0	0
New.ReferenceOTU522	0	0	0	0	0	0	0	0	0	0	0	0	0	0	0	0	0	0	0	0	0	0	0	0	0	0	0	0	0	0	0	0	0	0	0	0	0	0	0	0	0	0	0	0	0	0	0	0	0
4382048	0	0	0	0	0	0	0	0	0	0	0	0	0	0	0	0	0	0	0	0	0	0	0	0	0	0	0	0	0	0	0	0	0	0	0	0	0	0	0	0	0	0	0	0	0	0	0	6	0
147381	0	0	0	0	0	0	0	0	0	0	0	0	0	0	0	0	0	0	0	0	0	0	0	0	0	0	0	0	0	0	0	3	0	0	0	0	0	0	0	0	0	0	0	0	0	0	0	0	0
569953	0	0	0	0	0	0	0	0	0	0	0	0	0	0	0	0	0	0	0	0	0	0	0	0	0	0	0	0	0	0	0	0	0	0	0	0	0	0	0	0	0	0	0	0	0	0	0	0	0
New.ReferenceOTU997	0	0	0	0	0	0	0	0	0	0	0	0	0	0	0	0	0	0	0	0	0	0	0	0	0	0	0	0	0	0	0	0	0	0	0	0	0	0	0	0	0	0	0	0	0	0	0	0	0
New.CleanUp.ReferenceOTU325512	0	0	0	0	0	0	0	0	0	0	0	0	0	0	0	0	0	0	0	0	0	0	0	0	0	0	0	0	0	0	0	0	0	0	0	0	0	0	0	0	0	0	0	0	0	0	0	0	0
4328135	0	0	0	0	0	0	0	0	0	0	0	0	0	0	0	0	0	0	0	0	0	0	0	0	0	0	0	0	0	0	0	0	0	0	0	0	0	0	0	0	0	0	0	0	0	0	0	0	0
160679	0	0	0	0	0	0	0	0	0	0	0	0	0	0	0	0	0	0	0	0	0	0	0	0	0	0	0	0	0	0	0	0	0	0	0	0	0	0	0	0	0	0	0	0	0	0	0	0	0
11353	0	0	0	0	0	0	0	0	0	0	0	0	0	0	0	0	0	0	0	0	0	0	0	0	0	0	0	0	0	0	0	0	0	0	0	0	0	0	0	0	0	0	0	0	0	0	0	0	0
848753	0	0	0	0	0	0	0	0	0	0	0	0	0	0	0	0	0	0	0	0	0	0	0	0	0	0	0	0	0	0	0	0	0	0	0	0	0	0	0	0	0	0	0	0	0	0	0	0	0
241760	0	0	0	0	0	0	0	0	0	0	0	0	0	0	0	0	0	0	0	0	0	0	0	0	0	0	0	0	0	0	0	0	0	0	0	0	0	0	0	0	0	0	0	0	0	0	0	0	0
308664	0	0	0	0	0	0	0	0	0	0	0	0	0	0	0	0	0	0	0	0	0	0	0	0	0	0	0	0	0	0	0	0	0	0	0	0	0	0	0	0	0	0	0	0	0	0	0	0	0
541327	0	0	0	0	0	0	0	0	0	0	0	0	0	0	0	0	0	0	0	0	0	0	0	0	0	0	0	0	0	0	0	0	0	0	0	0	0	0	0	0	0	0	0	0	0	0	0	0	0
512663	0	0	0	0	0	0	0	0	0	0	0	0	0	0	0	0	0	0	0	0	0	0	0	0	0	0	0	0	0	0	0	0	0	0	0	0	0	0	0	0	0	0	0	0	0	0	0	0	0
1131215	0	0	0	0	0	0	0	0	0	0	0	0	0	0	0	0	0	0	0	0	0	0	0	0	6	0	0	148	0	0	0	30	6	3	0	0	0	0	0	0	0	0	0	0	0	0	0	0	0
808623	0	0	0	0	0	0	0	0	0	0	0	0	0	0	0	0	0	0	0	0	0	0	0	0	0	0	0	0	0	0	0	0	0	0	0	0	0	0	0	0	0	0	0	0	0	0	0	0	0
810972	0	0	0	0	0	14	0	0	0	0	0	0	0	0	0	0	0	0	0	0	0	0	0	0	0	0	0	0	0	0	0	0	6	0	0	0	0	0	0	0	0	0	0	0	0	0	0	0	0
370425	0	0	0	0	0	0	0	0	0	0	0	0	0	0	0	0	0	0	0	0	0	0	0	0	0	0	0	54	0	0	0	0	0	0	0	0	0	0	0	0	0	0	0	0	0	0	0	0	0
822903	0	0	0	0	0	0	0	0	0	0	0	0	0	0	0	0	0	0	0	0	0	0	0	0	0	0	0	0	0	0	0	0	0	0	0	0	0	0	0	0	0	0	0	0	0	0	0	0	0
New.CleanUp.ReferenceOTU38478	0	0	0	0	0	0	0	0	0	0	0	0	0	0	0	0	0	0	0	0	0	0	0	0	0	0	0	0	0	0	0	0	0	0	0	0	0	0	0	0	0	0	0	0	0	0	0	0	0
235064	0	0	0	0	0	0	0	0	0	0	0	0	0	0	0	0	0	0	0	0	0	0	0	0	0	0	0	0	0	0	0	0	0	0	0	0	0	0	0	0	0	0	0	0	0	0	0	0	0
New.CleanUp.ReferenceOTU181192	0	0	0	0	0	0	0	0	0	0	0	0	0	0	0	0	0	0	0	0	0	0	0	0	0	0	0	0	0	0	0	0	0	0	0	0	0	0	0	0	0	0	0	0	0	0	0	0	0
1113998	0	0	0	0	0	0	0	0	0	0	0	0	0	0	0	0	0	0	0	0	0	0	0	0	0	0	0	0	0	0	0	0	0	0	0	0	0	0	0	0	0	0	0	0	0	0	0	0	0
New.CleanUp.ReferenceOTU72780	0	0	0	0	0	0	0	0	0	0	0	0	0	0	0	0	0	0	0	0	0	0	0	0	0	0	0	0	0	0	0	0	0	0	0	0	0	0	0	0	0	0	0	0	0	0	0	0	0
New.CleanUp.ReferenceOTU319097	0	0	0	0	0	0	0	0	0	0	0	0	0	0	0	0	0	0	0	0	0	0	0	0	0	0	0	0	0	0	0	0	0	3	0	0	0	0	0	0	0	0	0	0	0	0	0	0	0
New.CleanUp.ReferenceOTU165579	0	0	0	0	0	0	0	0	0	0	0	0	0	0	0	0	0	0	0	0	0	0	0	0	0	0	0	0	0	0	0	16	0	0	0	0	0	0	0	0	0	0	0	0	0	0	0	0	0
New.CleanUp.ReferenceOTU330786	0	0	0	0	0	0	0	0	0	0	0	0	0	0	0	0	0	0	0	0	0	0	0	0	0	0	0	0	0	0	0	0	0	0	0	0	0	0	0	0	0	0	0	0	0	0	0	0	0
New.ReferenceOTU1116	0	0	0	0	0	0	0	0	0	0	0	0	0	0	0	0	0	0	0	0	0	0	0	0	0	0	0	49	0	0	0	0	0	0	0	0	0	0	0	0	0	0	0	0	0	0	0	0	0
1669782	0	0	0	0	0	0	0	0	0	0	0	0	0	0	0	0	0	0	0	0	0	0	0	0	0	0	0	0	0	0	0	0	0	0	0	0	0	0	0	0	0	0	0	0	0	0	0	0	0
871230	0	0	0	0	0	0	0	0	0	0	0	0	0	0	0	0	0	0	0	0	0	0	0	0	0	0	0	0	0	0	0	0	0	0	0	0	0	0	0	0	0	0	0	0	0	0	0	0	0
New.CleanUp.ReferenceOTU356311	0	0	0	0	0	0	0	0	0	0	0	0	0	0	0	0	0	0	0	0	0	0	0	0	0	0	0	0	0	0	0	0	0	0	0	0	0	0	0	0	0	0	0	0	0	0	0	0	0
New.CleanUp.ReferenceOTU51889	0	0	0	0	0	0	0	0	0	0	0	0	0	0	0	0	0	0	0	0	0	0	0	0	0	0	0	0	0	0	0	0	0	0	0	0	0	0	0	0	0	0	0	0	0	0	0	0	0
New.CleanUp.ReferenceOTU199728	0	0	0	0	0	0	0	0	0	0	0	0	0	0	0	0	0	0	0	0	0	0	0	0	0	0	0	0	0	0	0	0	0	0	0	0	0	0	0	0	0	0	0	0	0	0	0	0	0
New.CleanUp.ReferenceOTU176259	0	0	0	0	0	0	0	0	0	0	0	0	0	0	0	0	0	0	0	0	0	0	0	0	0	0	0	0	0	0	0	0	0	0	0	0	0	0	0	0	0	0	0	0	0	0	0	0	0
New.CleanUp.ReferenceOTU90667	0	0	0	0	0	0	0	0	0	0	0	0	0	0	0	0	0	0	0	0	0	0	0	0	0	0	0	0	0	0	0	0	0	0	0	0	0	0	0	0	0	0	0	0	0	0	0	0	0
New.CleanUp.ReferenceOTU9523	0	0	0	0	0	0	0	0	0	0	0	0	0	0	0	0	0	0	0	0	0	0	0	0	0	0	0	0	0	0	0	0	0	0	0	0	0	0	0	0	0	0	0	0	0	0	0	0	0
368218	0	0	0	0	0	0	0	0	0	0	0	0	0	0	0	0	0	0	0	0	0	0	0	0	0	0	0	49	0	0	0	0	0	0	0	0	0	0	0	0	0	0	201	0	0	0	0	0	0
1096572	0	0	0	0	0	0	0	0	0	0	0	0	0	0	0	0	0	0	0	0	0	0	0	0	0	0	0	0	0	0	0	0	0	0	0	0	0	0	0	0	0	0	0	0	0	0	0	0	0
560846	0	0	0	0	0	0	0	0	0	0	0	0	0	0	0	0	0	0	0	0	0	0	0	0	0	0	0	0	0	0	0	0	0	0	0	0	0	0	0	0	0	0	3	0	0	0	0	0	0
811263	0	0	0	0	0	0	0	0	0	0	0	0	0	27	0	0	0	0	0	0	0	0	0	0	0	0	0	3	0	0	0	0	0	0	0	0	0	0	0	0	0	0	0	0	0	0	0	0	0
New.ReferenceOTU78	0	0	0	0	0	0	0	0	0	0	0	0	0	0	0	0	0	0	0	0	0	0	0	0	10	0	0	0	0	0	0	0	0	5	0	0	0	0	0	0	0	0	0	0	0	0	0	0	0
814721	0	0	0	0	0	0	0	0	0	0	0	0	0	0	0	0	0	0	0	0	7	0	0	0	3	0	0	0	0	0	0	0	0	5	0	0	0	0	0	0	0	0	0	3	0	0	0	0	0
4458998	0	0	0	0	0	0	0	0	0	0	0	0	0	0	0	0	0	0	0	0	0	0	0	0	0	0	0	0	0	0	0	0	0	0	0	0	0	0	0	0	0	0	0	0	0	0	0	0	0
4369127	0	0	0	0	0	0	0	0	0	0	0	0	0	0	0	0	0	0	0	0	11	0	0	0	6	0	0	0	0	0	0	0	0	8	0	0	0	0	0	0	0	0	0	0	0	0	0	0	0
974817	0	0	0	0	0	0	0	0	0	0	0	0	0	0	0	0	0	0	0	0	0	0	0	0	0	0	0	0	0	0	0	0	0	0	0	0	0	0	0	0	0	0	0	0	0	0	0	0	0
New.ReferenceOTU731	0	0	0	0	0	0	0	0	0	0	0	0	0	0	0	0	0	0	0	0	0	0	0	0	0	0	0	0	0	0	0	0	0	0	0	0	0	0	0	0	0	0	0	0	0	0	0	0	0
696456	0	0	0	0	0	0	0	0	0	0	0	0	0	0	0	0	0	0	0	0	0	0	0	0	0	0	0	0	0	0	0	0	0	0	0	0	0	0	0	0	0	0	0	0	0	0	0	0	0
New.CleanUp.ReferenceOTU109313	0	0	0	0	0	0	0	0	0	0	0	0	0	0	0	0	0	0	0	0	0	0	0	0	0	0	0	0	0	0	0	0	0	0	0	0	0	0	0	0	0	0	0	0	0	0	0	0	0
333731	0	0	0	0	0	0	0	0	0	0	0	0	0	0	0	0	0	0	0	0	0	0	0	0	0	0	0	0	0	0	0	0	0	0	0	0	0	0	0	0	0	0	0	0	0	0	0	0	0
New.ReferenceOTU81	0	0	0	0	0	0	0	0	0	0	0	0	0	0	0	0	0	0	0	0	0	0	0	0	0	0	0	0	0	0	0	0	0	0	0	0	0	0	0	0	0	0	0	0	0	0	0	0	0
4382271	0	0	0	0	0	0	0	0	0	0	0	0	0	0	0	0	0	0	0	0	0	0	0	0	0	0	0	0	0	0	0	0	0	0	0	0	0	0	0	0	0	0	0	0	0	0	0	0	0
New.CleanUp.ReferenceOTU10832	0	0	0	0	0	0	0	0	0	0	0	0	0	0	0	0	0	0	0	0	0	0	0	0	0	0	0	0	0	0	0	0	0	0	0	0	0	0	0	0	0	0	0	0	0	0	0	0	0
New.CleanUp.ReferenceOTU171518	0	0	0	0	0	0	0	0	0	0	0	0	0	0	0	0	0	0	0	0	0	0	0	0	0	0	0	0	0	0	0	0	0	0	0	0	0	0	0	0	0	0	0	0	0	0	0	0	0
849585	0	0	0	0	0	34	0	0	0	0	0	0	0	0	0	0	0	0	0	0	0	0	0	0	0	0	0	0	0	0	0	0	0	0	0	0	0	0	0	0	0	0	0	0	0	0	0	0	0
New.CleanUp.ReferenceOTU4650	0	0	0	0	0	0	0	0	0	0	0	0	0	0	0	0	0	0	0	0	0	0	0	0	0	0	0	0	0	0	0	0	0	0	0	0	0	0	0	0	0	0	0	0	0	0	0	0	0
550302	0	0	0	0	0	0	0	0	0	0	0	0	0	0	0	0	0	0	0	0	0	0	0	0	0	0	0	0	0	0	0	0	0	0	0	0	0	0	0	0	0	0	0	0	0	0	0	0	0
4479035	0	0	0	0	0	0	0	0	0	0	0	0	0	0	0	0	0	0	0	0	0	0	0	0	0	0	0	0	0	0	0	0	0	0	0	0	0	0	0	0	0	0	0	0	0	0	0	0	0
962282	0	0	0	0	0	0	0	0	0	0	0	0	0	0	0	0	0	0	0	0	0	0	0	0	0	0	0	0	0	0	0	0	0	0	0	0	0	0	0	0	0	0	0	0	0	0	0	0	0
970425	0	0	0	0	0	0	0	0	0	0	0	0	0	0	0	0	0	0	0	0	0	0	0	0	0	0	0	0	0	0	0	0	0	0	0	0	0	0	0	0	0	0	0	0	0	0	0	0	0
New.CleanUp.ReferenceOTU206550	0	0	0	0	0	0	0	0	0	0	0	0	0	0	0	0	0	0	0	0	0	0	0	0	0	0	0	0	0	0	0	0	0	0	0	0	0	0	0	0	0	0	0	0	0	0	0	0	0
New.CleanUp.ReferenceOTU140339	0	0	0	0	0	0	0	0	0	0	0	0	0	0	0	0	0	0	0	0	0	0	0	0	0	0	0	0	0	0	0	0	0	0	0	0	0	0	0	0	0	0	0	0	0	0	0	0	0
New.CleanUp.ReferenceOTU258867	0	0	0	0	0	0	0	0	0	0	0	0	0	0	0	0	0	0	0	0	0	0	0	0	0	0	0	0	0	0	0	0	0	0	0	0	0	0	0	0	0	0	0	0	0	0	0	0	0
New.CleanUp.ReferenceOTU21764	0	0	0	0	0	0	0	0	0	0	0	0	0	0	0	0	0	0	0	0	0	0	0	0	0	0	0	0	0	0	0	0	0	0	0	0	0	0	0	0	0	0	0	0	0	0	0	0	0
New.CleanUp.ReferenceOTU8199	0	0	0	0	0	0	0	0	0	0	0	0	0	0	0	0	0	0	0	0	0	0	0	0	0	0	0	0	0	0	0	0	0	0	0	0	0	0	0	0	0	0	0	0	0	0	0	0	0
New.ReferenceOTU1171	0	0	0	0	0	0	0	0	0	0	0	0	0	0	0	0	0	0	0	0	0	0	0	0	0	0	0	132	0	0	0	12	0	0	0	0	0	0	0	0	0	0	0	0	0	0	0	0	0
New.CleanUp.ReferenceOTU14213	0	0	0	0	0	0	0	0	0	0	0	0	0	0	0	0	0	0	0	0	0	0	0	0	0	0	0	0	0	0	0	0	0	0	0	0	0	0	0	0	0	0	0	0	0	0	0	0	0
4156025	0	0	0	0	0	0	0	0	0	0	0	0	0	0	0	0	0	0	0	0	0	0	0	0	0	0	0	36	0	0	0	0	32	0	0	0	0	0	0	0	0	0	0	0	0	0	0	3	0
New.ReferenceOTU1070	0	3	0	0	0	16	0	0	0	0	0	0	0	0	0	0	0	0	157	0	0	0	0	0	0	0	0	0	0	0	0	6	5	0	0	0	0	0	0	0	0	0	0	0	0	0	0	0	0
865455	0	0	0	0	0	0	0	0	0	0	0	0	0	0	0	0	0	0	0	0	0	0	0	0	0	0	0	0	0	0	0	0	0	0	0	0	0	0	0	0	0	0	0	0	0	0	0	0	0
847918	0	0	0	0	0	0	0	0	0	0	0	0	0	0	0	0	0	0	0	0	0	0	0	0	0	0	0	0	0	0	0	0	0	0	0	0	0	0	0	0	0	0	0	0	0	0	0	0	0
New.ReferenceOTU870	0	0	0	0	57	0	0	0	0	36	0	21	13	0	0	0	36	4	0	0	0	0	10	0	0	0	0	0	86	0	0	0	0	5	17	0	0	14	0	0	6	0	0	0	0	0	0	0	3
New.CleanUp.ReferenceOTU269200	0	0	0	0	27	0	0	0	0	22	0	15	7	0	0	0	19	7	0	19	0	0	9	0	0	0	0	0	34	20	0	0	0	12	14	0	0	5	0	0	5	0	0	0	0	0	18	0	0
New.CleanUp.ReferenceOTU283459	0	0	0	0	47	0	0	0	0	19	0	13	21	0	0	0	68	0	0	4	0	0	12	0	0	0	0	0	47	0	0	0	0	0	18	0	4	18	0	0	5	0	0	0	0	0	0	0	0
New.CleanUp.ReferenceOTU278559	0	0	0	0	5	0	0	0	0	4	0	6	0	0	0	0	3	5	0	0	0	0	9	0	0	0	0	0	6	84	0	0	0	26	0	0	0	0	0	0	0	0	0	0	0	0	41	0	0
New.CleanUp.ReferenceOTU84343	0	0	0	0	0	0	0	0	0	0	0	0	0	0	0	0	0	0	0	7	0	0	0	0	0	0	0	0	0	0	0	0	0	0	0	0	0	0	0	0	0	0	0	0	0	0	0	0	0
New.ReferenceOTU1133	0	3	0	0	17	0	0	0	0	23	0	0	15	0	0	0	0	0	72	3835	0	3	0	0	5	0	0	0	5	9	0	0	0	0	3	3	23	7	0	0	0	0	0	0	0	0	0	6	0
New.ReferenceOTU23	0	7	0	0	36	9	0	0	0	206	0	18	4	0	0	0	3	0	0	0	0	0	13	0	0	7	0	0	77	0	0	3	45	0	54	0	0	13	0	9	0	0	0	0	4	0	0	0	0
1794376	0	0	0	0	0	0	0	0	0	0	0	0	0	0	0	0	0	0	0	0	0	0	0	0	0	0	0	0	0	0	0	0	0	0	0	0	0	0	0	0	0	0	0	0	0	0	0	0	0
New.CleanUp.ReferenceOTU123565	0	0	0	0	0	0	0	0	0	0	0	0	0	0	0	0	0	0	0	0	0	0	0	0	0	0	0	0	0	0	0	0	0	0	0	0	0	0	0	0	0	0	0	0	0	0	0	0	0
New.CleanUp.ReferenceOTU234482	0	0	0	0	0	0	0	0	0	0	0	0	0	0	0	0	0	0	0	67	0	0	0	0	0	0	0	0	0	0	0	0	0	0	0	0	0	0	0	0	0	0	0	0	0	0	0	0	0
New.CleanUp.ReferenceOTU174927	0	0	0	0	0	0	0	0	0	0	0	0	0	0	0	0	0	0	0	63	0	0	0	0	0	0	0	0	0	0	0	0	0	0	0	0	0	0	0	0	0	0	0	0	0	0	0	0	0
New.CleanUp.ReferenceOTU231495	0	0	0	0	0	0	0	0	0	0	0	0	0	0	0	0	0	0	0	0	0	0	0	0	0	0	0	0	0	0	0	0	0	0	0	0	0	0	0	0	0	0	0	0	0	0	0	0	0
New.ReferenceOTU122	0	0	0	0	11	3	3	21	40	24	22	8	16	21	41	8	7	24	25	42	19	20	16	27	10	6	8	7	8	19	7	11	0	17	41	4	5	28	4	25	8	14	3	0	4	0	12	18	22
New.CleanUp.ReferenceOTU360321	0	0	0	0	45	0	0	0	0	0	0	20	51	0	0	0	4	0	0	34	0	0	0	0	0	3	0	0	16	0	0	0	0	0	15	0	0	19	0	0	0	0	0	0	0	0	0	0	0
New.CleanUp.ReferenceOTU35194	0	0	0	0	3	0	0	0	0	0	0	0	0	0	0	0	0	0	0	0	0	0	0	0	0	0	0	0	0	0	0	0	0	0	7	0	0	0	0	0	0	0	0	0	0	0	0	0	0
New.CleanUp.ReferenceOTU280020	0	0	0	0	4	0	0	0	0	0	0	0	0	0	0	0	0	0	0	25	0	0	0	0	0	0	0	0	4	0	0	0	0	0	8	0	0	0	0	0	0	0	0	0	0	0	0	0	0
509989	72	2730	843	7	4741	1217	795	3542	6477	6584	3772	2024	8910	4644	30026	1153	3169	3035	10115	7370	3113	4576	6099	4560	1646	4967	938	1095	3071	2429	1414	1743	239	4049	8821	2048	3257	11351	419	18642	871	1859	668	0	1262	4	2437	2331	2812
New.ReferenceOTU417	18	0	75	0	29	0	24	2367	34328	273	5007	110	23	1403	0	382	0	1537	0	209	6067	12078	2731	2506	2021	0	601	0	34	11324	3587	0	0	9069	0	0	3	71	1310	0	0	0	0	0	0	0	8362	0	0
New.ReferenceOTU343	9	392	69	5	687	135	0	71	64	424	5	230	1322	0	3186	26	480	13	867	238	0	13	603	30	13	475	4	63	459	15	72	40	0	19	748	262	371	1529	0	2616	22	55	0	0	35	0	18	108	60
New.ReferenceOTU982	0	14	21	0	629	0	0	86	0	112	64	379	1381	0	0	28	450	54	0	267	0	33	260	0	0	63	29	0	550	12	0	0	0	3	282	11	47	850	4	0	18	95	0	0	24	0	9	107	182
New.ReferenceOTU51	0	36	27	0	282	0	0	28	255	318	18	108	89	76	0	3	41	0	0	0	0	93	1048	0	9	50	0	0	325	8	3	7	0	26	52	30	62	246	4	124	0	4	0	0	10	0	86	0	22
New.ReferenceOTU647	0	12	12	0	462	0	0	9	0	57	0	195	1012	0	4	4	308	0	0	61	0	0	138	0	0	29	0	0	294	0	0	0	0	0	139	5	38	728	0	3	4	14	0	0	3	0	0	32	27
New.ReferenceOTU242	0	0	12	0	223	0	0	81	0	86	88	164	453	0	0	39	128	65	0	222	0	36	105	0	0	22	33	0	214	5	0	0	0	6	128	0	19	238	0	0	14	80	0	0	16	0	5	89	180
New.ReferenceOTU843	0	29	0	0	165	0	0	7	0	132	0	29	40	372	0	0	12	0	0	130	0	120	282	0	169	19	0	0	53	37	0	0	0	261	82	19	8	68	0	0	0	12	0	0	4	0	91	0	18
New.ReferenceOTU956	0	0	5	0	84	0	0	61	6	43	71	61	124	4	0	9	37	58	0	187	0	86	59	0	0	13	17	0	82	41	0	0	0	21	47	0	4	94	9	0	9	35	0	0	6	0	61	35	82
New.ReferenceOTU265	0	5	0	0	28	0	0	64	232	26	5	0	4	185	0	0	0	0	0	23	0	223	59	101	206	0	7	0	4	93	23	0	0	157	19	6	4	15	0	0	0	0	0	0	0	0	176	0	21
New.ReferenceOTU1155	0	0	0	0	22	0	3	151	4	11	212	9	11	0	0	3	6	87	0	60	0	302	97	0	0	0	56	0	15	206	0	0	0	36	4	0	0	14	41	0	0	0	0	0	0	0	225	0	6
New.CleanUp.ReferenceOTU114162	0	5	0	0	0	0	0	20	0	32	0	0	0	0	0	0	0	0	0	966	0	0	23	0	0	0	0	0	6	12	6	0	0	0	0	0	0	0	0	0	0	0	0	0	0	0	0	0	5
New.ReferenceOTU501	0	0	0	0	20	0	0	124	0	3	133	14	11	0	0	4	0	57	0	41	0	216	98	0	3	0	26	0	12	123	0	0	0	23	8	0	0	18	23	0	0	0	0	0	0	0	140	0	0
4435532	0	0	0	0	15	0	0	14	67	17	3	0	0	58	0	0	0	0	0	8	0	93	24	6	94	0	0	0	5	23	8	0	0	57	5	0	0	4	3	0	0	0	0	0	0	0	28	0	18
New.ReferenceOTU612	0	0	0	0	0	0	0	0	0	0	0	0	0	0	0	0	0	0	0	0	0	0	0	0	0	0	0	0	0	13	0	0	0	0	0	0	0	0	0	0	0	0	0	0	0	0	5	0	0
New.ReferenceOTU725	0	0	0	0	3	0	0	53	92	0	72	6	4	3	0	3	0	26	0	7	12	116	54	10	8	0	8	0	0	77	14	0	0	33	0	0	0	0	16	0	0	0	0	0	0	0	74	0	0
New.CleanUp.ReferenceOTU61763	0	0	0	0	40	0	0	39	0	9	48	27	10	0	0	4	0	19	0	13	0	38	86	0	0	0	14	0	47	13	0	0	0	6	0	0	0	11	4	0	0	0	0	0	0	0	12	0	7
New.ReferenceOTU295	0	0	0	0	12	0	0	54	0	0	52	0	0	0	0	0	0	17	0	19	0	77	29	0	0	0	8	0	0	39	0	0	0	9	4	0	0	9	6	0	0	0	0	0	0	0	60	0	4
New.ReferenceOTU159	0	0	0	0	38	0	0	25	0	5	0	11	16	0	0	0	0	4	0	13	0	4	87	0	0	0	0	0	14	4	0	0	0	0	4	0	0	52	0	0	0	0	0	0	0	0	8	0	0
New.CleanUp.ReferenceOTU200348	0	0	0	0	0	0	0	5	0	0	0	0	0	0	0	0	0	0	0	234	0	0	0	0	0	0	0	0	0	0	0	0	0	0	0	0	0	0	0	0	0	0	0	0	0	0	0	0	3
New.CleanUp.ReferenceOTU332269	0	0	0	0	0	0	0	0	0	0	0	0	0	0	0	0	0	0	0	366	0	0	0	0	0	0	0	0	0	0	0	0	0	0	0	0	0	5	0	0	0	0	0	0	0	0	0	0	0
New.CleanUp.ReferenceOTU176649	0	0	0	0	0	0	0	0	0	0	0	0	0	0	0	0	0	0	0	219	0	0	0	0	0	0	0	0	0	0	0	0	0	0	0	0	0	3	0	0	0	0	0	0	0	0	0	0	0
New.CleanUp.ReferenceOTU131954	0	0	0	0	4	0	0	0	0	0	0	0	0	0	0	0	0	0	0	304	0	0	0	0	0	0	0	0	0	0	0	0	0	0	0	0	0	0	0	0	0	0	0	0	0	0	0	0	0
New.CleanUp.ReferenceOTU79175	0	0	0	0	4	0	14	21	0	3	15	3	0	0	0	0	0	12	0	20	0	6	6	0	0	3	4	0	4	5	0	0	0	0	0	0	0	6	3	0	0	4	0	0	0	0	6	9	7
New.CleanUp.ReferenceOTU267337	0	0	0	0	21	0	0	5	0	3	0	5	45	0	0	0	8	0	0	4	0	0	19	0	0	3	0	0	13	0	0	0	0	0	4	0	0	26	0	0	0	0	0	0	0	0	0	0	0
New.CleanUp.ReferenceOTU147847	0	4	0	0	3	0	0	0	0	0	0	0	13	0	12	0	5	0	5	0	0	0	5	0	0	3	0	0	0	0	0	0	0	0	8	0	0	14	0	16	0	0	0	0	0	0	0	0	0
New.ReferenceOTU293	0	0	0	0	0	0	0	0	0	0	0	0	0	0	0	0	0	0	0	45	0	0	0	0	0	0	0	0	0	0	0	0	0	0	0	0	0	0	0	0	0	0	0	0	0	0	0	0	0
New.ReferenceOTU504	0	0	0	0	0	0	0	0	4	0	5	3	3	3	12	0	0	3	0	7	0	6	0	7	0	4	0	0	0	0	0	0	0	0	0	0	0	0	0	4	0	0	0	0	0	0	3	4	0
New.CleanUp.ReferenceOTU221900	0	0	0	0	16	0	0	0	0	0	0	13	7	0	0	0	5	0	0	0	0	0	0	0	0	0	0	0	21	0	0	0	0	0	0	0	0	62	0	0	0	0	0	0	0	0	0	0	0
New.CleanUp.ReferenceOTU251241	0	0	0	0	7	0	3	0	0	0	3	5	7	0	0	0	3	0	0	10	0	0	0	0	0	0	4	0	3	0	0	0	0	0	7	0	0	3	0	0	0	0	0	0	0	0	0	0	0
New.CleanUp.ReferenceOTU353894	0	0	0	0	3	0	0	0	0	6	13	0	0	0	0	0	0	13	0	0	0	0	3	0	0	0	10	0	4	0	0	0	0	0	4	0	0	0	0	0	3	6	0	0	0	0	0	3	0
New.ReferenceOTU746	0	0	0	0	0	0	0	0	8	0	4	0	0	0	7	0	0	0	3	5	0	0	3	4	0	0	0	0	0	0	0	0	0	3	0	0	0	3	0	4	0	0	0	0	0	0	0	0	0
New.ReferenceOTU686	0	0	0	0	0	0	0	0	0	0	0	0	0	0	0	0	0	0	0	62	0	0	0	0	0	0	0	0	0	0	0	0	0	0	0	0	0	0	0	0	0	0	0	0	0	0	0	0	0
New.CleanUp.ReferenceOTU162043	0	0	0	0	17	0	0	0	0	0	0	7	15	0	0	0	5	0	0	0	0	0	0	0	0	0	0	0	17	0	0	0	0	0	0	0	0	24	0	0	0	0	0	0	0	0	0	0	0
New.CleanUp.ReferenceOTU82721	0	0	0	0	14	0	0	0	0	0	0	4	4	0	0	0	0	0	0	0	0	0	12	0	0	0	0	0	14	0	0	0	0	0	0	0	0	4	0	0	0	0	0	0	0	0	0	0	0
New.ReferenceOTU1141	0	0	0	0	8	0	0	0	0	3	3	4	0	0	0	0	0	0	0	0	0	0	5	0	0	0	0	0	0	0	0	0	0	0	4	0	0	0	0	0	0	3	0	0	0	0	0	10	0
New.CleanUp.ReferenceOTU222654	0	0	0	0	8	0	0	0	0	0	0	0	3	0	0	0	0	0	0	0	0	0	12	0	0	0	0	0	11	0	0	0	0	0	0	0	0	3	0	0	0	0	0	0	0	0	0	0	0
New.CleanUp.ReferenceOTU159124	0	0	0	0	11	0	0	0	0	0	0	3	0	0	0	0	0	0	0	0	0	0	6	0	0	0	0	0	15	0	0	0	0	0	0	0	0	9	0	0	0	0	0	0	0	0	0	0	0
New.ReferenceOTU237	0	0	0	0	4	0	0	0	0	0	0	0	0	0	0	0	0	0	0	62	0	0	0	0	0	0	0	0	0	0	0	0	0	0	0	0	0	7	0	0	0	0	0	0	0	0	0	0	0
New.CleanUp.ReferenceOTU20530	0	0	0	0	17	0	0	0	0	0	0	0	4	0	0	0	0	0	0	12	0	0	8	0	0	0	0	0	3	0	0	0	0	0	3	0	0	3	0	0	0	0	0	0	0	0	0	0	0
New.CleanUp.ReferenceOTU198950	0	0	0	0	0	0	0	0	0	0	6	0	0	0	0	0	0	6	0	7	0	5	0	0	0	0	0	0	0	0	0	0	0	0	3	0	0	0	0	0	0	0	0	0	0	0	0	0	4
New.CleanUp.ReferenceOTU46133	0	0	6	0	3	0	0	0	0	0	0	8	0	0	0	0	12	0	0	0	0	0	0	0	0	0	0	0	3	0	0	0	0	0	0	0	0	3	0	0	0	4	0	0	0	0	0	0	0
New.CleanUp.ReferenceOTU179543	0	0	0	0	0	0	0	4	0	0	0	0	5	0	0	0	0	0	0	0	0	0	0	0	0	0	0	0	0	0	0	0	0	0	0	0	0	0	0	0	0	0	0	0	0	0	0	0	0
New.CleanUp.ReferenceOTU14300	0	0	0	0	10	0	0	4	0	0	6	5	0	0	0	0	0	0	0	0	0	6	5	0	0	0	0	0	6	0	0	0	0	0	0	0	0	3	0	0	0	0	0	0	0	0	0	0	0
New.ReferenceOTU893	0	0	0	0	0	0	0	0	0	0	0	0	0	5	5	0	0	0	3	3	0	0	0	0	0	0	0	0	0	0	0	0	0	4	0	0	0	0	0	0	0	0	0	0	0	0	3	0	0
New.CleanUp.ReferenceOTU184444	0	0	0	0	5	0	0	0	0	0	0	0	5	0	0	0	3	0	0	0	0	0	0	0	0	0	0	0	0	0	0	0	0	0	0	0	0	0	0	0	0	0	0	0	0	0	0	0	0
New.CleanUp.ReferenceOTU206485	0	0	0	0	7	0	0	0	0	0	0	0	0	0	0	0	0	0	0	0	0	0	4	0	0	0	0	0	0	0	0	0	0	0	3	0	0	0	0	0	0	0	0	0	0	0	0	4	0
New.CleanUp.ReferenceOTU297795	0	0	0	0	0	0	0	0	0	0	0	0	0	0	0	0	0	0	0	0	0	0	0	0	0	0	0	0	0	0	0	0	0	0	3	0	0	0	0	0	0	0	0	0	0	0	0	0	0
New.CleanUp.ReferenceOTU129974	0	0	0	0	6	0	0	0	0	0	0	0	4	0	0	0	0	0	0	5	0	0	0	0	0	0	0	0	0	0	0	0	0	0	0	0	0	12	0	0	0	0	0	0	0	0	0	0	0
New.ReferenceOTU793	0	69	3	0	341	0	0	0	0	45	0	112	305	85	404	0	14	0	140	842	0	0	58	0	6	125	0	0	133	0	0	0	0	6	680	19	103	193	0	414	0	4	0	0	7	0	3	0	0
New.ReferenceOTU1024	0	0	10	0	70	0	0	0	0	27	0	4	10	0	135	0	0	0	0	0	0	0	0	0	0	27	0	0	9	0	0	12	0	0	287	18	5	7	0	226	3	3	0	0	9	0	0	0	0
New.ReferenceOTU834	0	0	0	0	53	0	0	0	0	0	0	14	62	0	0	0	0	0	0	191	0	0	0	0	0	0	0	0	10	0	0	0	0	0	53	0	9	40	0	0	0	0	0	0	0	0	0	0	0
New.CleanUp.ReferenceOTU225623	0	0	0	0	34	0	0	0	0	0	0	7	61	0	0	0	4	0	0	34	0	0	0	0	0	0	0	0	4	0	0	0	0	0	32	0	4	26	0	0	0	0	0	0	0	0	0	0	0
New.ReferenceOTU56	0	0	0	0	20	0	0	19	3	5	17	8	35	0	0	0	5	9	0	25	0	22	11	0	0	0	5	0	15	18	0	0	0	0	13	0	0	23	0	0	0	9	0	0	0	0	10	3	11
New.CleanUp.ReferenceOTU298910	0	0	0	0	46	0	0	0	0	0	0	18	35	0	0	0	0	0	0	35	0	0	0	0	0	0	0	0	24	0	0	0	0	0	22	0	0	18	0	0	0	0	0	0	0	0	0	0	0
New.CleanUp.ReferenceOTU116107	0	0	0	0	22	0	0	0	0	0	0	10	18	0	0	0	3	0	0	101	0	0	0	0	0	0	0	0	5	0	0	0	0	0	26	0	0	8	0	0	0	0	0	0	0	0	0	0	0
New.CleanUp.ReferenceOTU64320	0	0	0	0	0	0	0	0	0	0	0	0	0	0	0	0	0	0	0	21	0	0	0	0	0	0	0	0	0	0	0	0	0	0	0	0	0	0	0	0	0	0	0	0	0	0	0	0	0
New.ReferenceOTU621	0	0	0	0	41	0	0	0	0	31	0	34	17	0	0	0	46	4	0	0	0	0	5	0	0	0	0	0	87	0	0	0	0	4	19	0	3	7	0	0	0	0	0	0	0	0	3	3	0
509721	6	26	6	0	352	0	0	26	1372	2285	0	153	70	170	756	7	386	93	694	112	709	7	264	141	402	11	4	76	630	1110	19	13	66	4586	466	18	95	113	0	592	207	14	1296	0	8	0	344	17	3
New.CleanUp.ReferenceOTU27522	0	0	0	0	48	0	0	0	0	34	0	12	24	0	0	0	88	11	0	14	0	0	15	0	0	0	0	0	79	27	0	0	0	16	45	0	0	23	0	0	4	0	0	0	0	0	19	0	0
New.CleanUp.ReferenceOTU71451	0	0	0	0	11	0	0	0	0	22	0	9	3	0	0	0	29	0	0	4	0	0	3	0	0	0	0	0	20	18	0	0	0	16	11	0	0	5	0	0	0	0	0	0	0	0	0	0	0
New.CleanUp.ReferenceOTU284326	0	0	0	0	3	0	0	0	0	3	0	0	0	0	0	0	0	3	0	0	0	0	3	0	0	0	0	0	0	0	0	0	0	8	0	0	0	0	0	0	3	0	0	0	0	0	4	0	0
New.ReferenceOTU219	0	0	5	0	0	0	0	0	0	75	0	3	0	0	0	0	0	0	0	0	0	0	16	0	0	0	0	0	15	0	0	0	0	0	23	0	0	0	0	0	7	0	0	0	17	0	0	0	0
New.CleanUp.ReferenceOTU8265	0	0	0	0	0	0	0	0	0	0	0	0	0	0	0	0	0	0	0	44	0	0	0	0	0	0	0	0	0	0	0	0	0	0	0	0	0	0	0	0	0	0	0	0	0	0	0	0	0
New.CleanUp.ReferenceOTU93084	0	0	0	0	0	0	0	0	0	0	0	0	0	0	0	0	0	0	0	0	0	0	0	0	0	0	0	0	0	0	0	0	0	0	0	0	0	0	0	0	0	0	0	0	0	0	0	0	0
New.CleanUp.ReferenceOTU289273	0	0	0	0	0	0	0	0	0	0	0	0	0	0	0	0	0	0	0	0	0	0	0	0	0	0	0	0	0	0	0	0	0	0	0	0	0	0	0	0	0	0	0	0	0	0	0	0	0
New.CleanUp.ReferenceOTU280611	0	0	0	0	0	0	0	0	0	0	0	0	0	0	0	0	0	0	0	0	0	0	0	0	0	0	0	0	0	0	0	0	0	0	0	0	0	0	0	0	0	0	0	0	0	0	0	0	0
New.CleanUp.ReferenceOTU291405	0	0	0	0	0	0	0	0	0	0	0	0	0	0	0	0	0	0	0	5	0	0	0	0	0	0	0	0	0	0	0	0	0	0	0	0	0	0	0	0	0	0	0	0	0	0	4	5	0
New.ReferenceOTU125	0	0	8	0	32	0	0	0	240	305	4	0	7	0	4179	0	0	91	494	0	48	0	85	39	19	9	0	0	23	23	0	0	0	106	0	0	0	4	0	0	490	7	0	0	0	0	22	0	0
460594	0	0	0	0	0	0	0	0	5	6	0	0	0	0	63	0	0	3	5	0	0	0	5	0	0	0	0	0	0	0	0	0	0	0	0	0	0	0	0	0	6	0	0	0	0	0	0	0	0
New.CleanUp.ReferenceOTU184789	0	0	0	0	0	0	0	0	0	0	0	0	0	0	0	0	0	3	0	0	0	0	5	0	0	0	0	0	3	60	0	0	0	24	0	0	0	0	0	0	0	0	0	0	0	0	33	0	0
New.CleanUp.ReferenceOTU163798	0	0	0	0	0	0	0	0	0	0	0	0	0	0	0	0	0	0	0	0	0	0	0	0	0	0	0	0	0	0	0	0	0	0	0	0	0	0	0	0	0	0	0	0	0	0	0	0	0
New.CleanUp.ReferenceOTU291648	0	0	0	0	4	0	0	0	0	5	0	0	0	0	0	0	0	4	0	0	0	0	8	0	0	0	0	0	0	0	0	0	0	0	0	0	0	0	0	0	19	0	0	0	0	0	0	0	0
New.ReferenceOTU1006	0	0	0	0	13	0	0	0	0	0	0	0	0	0	0	0	0	0	0	1698	0	0	0	0	0	5	0	0	0	0	0	0	0	0	0	0	0	44	0	0	0	0	0	0	0	0	0	0	0
New.ReferenceOTU811	0	0	0	0	36	0	0	55	0	4	70	22	14	0	0	8	0	31	0	20	0	40	93	0	0	0	10	0	17	12	0	0	0	6	4	0	0	18	14	0	0	0	0	0	0	0	9	0	0
New.CleanUp.ReferenceOTU9949	0	0	0	0	0	0	0	0	0	0	0	0	0	0	0	0	0	0	0	89	0	0	0	0	0	0	0	0	0	0	0	0	0	0	0	0	0	3	0	0	0	0	0	0	0	0	0	0	0
New.CleanUp.ReferenceOTU30326	0	0	0	0	3	0	0	0	0	0	0	0	0	0	0	0	0	0	0	76	0	0	0	0	0	0	0	0	0	0	0	0	0	0	0	0	0	6	0	0	0	0	0	0	0	0	0	0	0
New.ReferenceOTU1138	195	1299	840	0	4778	1900	25	904	802	6997	961	3422	7331	544	10439	1947	2457	650	2615	1082	0	683	4001	593	437	1551	314	2364	4838	133	242	1086	132	663	3249	863	1854	5433	93	5384	383	1377	0	3	1054	440	139	2481	2632
554250	10	92	69	0	320	177	0	58	70	594	73	255	557	42	823	163	168	44	204	79	0	53	319	58	33	118	26	208	402	10	15	73	5	57	266	88	144	415	6	462	31	108	0	0	111	28	8	201	224
New.CleanUp.ReferenceOTU249613	0	0	0	0	3	0	0	5	24	14	0	0	0	25	0	0	0	0	0	80	0	10	0	0	7	0	0	0	3	0	0	0	0	0	0	0	0	8	0	0	0	0	0	0	0	0	3	0	0
New.CleanUp.ReferenceOTU143424	0	0	0	0	0	0	0	0	0	0	0	0	0	0	0	0	0	0	0	0	0	0	0	0	0	0	0	0	0	0	0	0	0	0	0	0	0	0	0	0	0	0	0	0	0	0	0	0	0
4424365	0	0	0	0	0	0	0	0	0	0	0	0	0	0	0	0	0	0	0	0	0	0	0	0	0	0	0	0	0	0	0	0	0	0	0	0	0	0	0	0	0	0	0	0	0	0	0	0	0
New.ReferenceOTU737	0	52	0	0	148	0	0	0	0	266	0	168	73	0	0	0	48	3	690	0	0	0	33	0	0	85	0	0	245	0	0	0	0	7	29	58	8	557	0	52	0	0	0	0	46	0	9	0	0
New.CleanUp.ReferenceOTU98297	0	0	0	0	0	0	0	0	0	0	0	0	0	0	0	0	0	0	0	0	0	0	0	0	0	0	0	0	0	0	0	0	0	0	0	0	0	0	0	0	0	0	0	0	0	0	0	0	0
1140134	0	0	0	0	0	0	0	0	0	0	0	0	0	0	0	0	0	0	0	0	0	0	0	0	0	0	0	0	0	0	0	0	0	0	0	0	0	0	0	0	0	0	0	0	0	0	0	0	0
New.CleanUp.ReferenceOTU79958	0	0	0	0	10	0	0	0	0	21	0	0	0	0	0	0	0	0	0	11	0	0	5	0	8	9	0	0	0	0	0	0	0	0	3	0	0	24	0	0	0	0	0	0	0	0	0	0	0
New.CleanUp.ReferenceOTU219973	0	0	0	0	0	0	0	0	0	0	0	0	0	0	0	0	0	0	0	0	0	0	0	0	0	0	0	0	0	0	0	0	0	0	0	0	0	0	0	0	0	0	0	0	0	0	0	0	0
New.CleanUp.ReferenceOTU82584	0	0	0	0	0	0	0	0	0	0	0	0	0	0	0	0	0	0	0	0	0	0	0	0	0	0	0	0	0	0	0	0	0	0	0	0	0	0	0	0	0	0	0	0	0	0	0	0	0
New.ReferenceOTU1038	0	3	0	0	0	0	3	0	0	0	0	0	0	0	0	39	0	23	0	0	0	0	0	0	14	0	0	0	0	0	5	0	29	130	0	0	0	0	0	0	0	0	0	0	0	73	3	8	0
New.CleanUp.ReferenceOTU282069	0	0	0	0	0	0	0	0	0	0	0	0	0	0	0	0	0	0	0	0	0	0	0	0	0	0	0	0	0	0	0	0	0	0	0	0	0	0	0	0	0	0	0	0	0	0	0	0	0
2082313	0	0	0	0	0	0	0	0	0	0	0	0	0	0	0	14	0	12	0	0	0	0	0	0	5	0	0	0	0	0	6	0	19	37	0	0	0	0	0	0	0	0	0	0	0	31	0	0	0
796692	0	0	0	0	0	0	0	0	0	0	0	0	0	0	0	0	0	0	0	0	0	0	0	0	0	0	0	0	0	0	0	0	0	54	0	0	0	0	0	0	0	0	0	0	0	0	0	7	0
567712	0	0	0	0	0	0	0	0	0	0	0	0	0	0	0	0	0	0	0	0	0	0	0	0	0	0	0	0	0	0	0	0	0	0	0	0	0	0	0	0	0	0	0	0	0	0	0	0	0
New.CleanUp.ReferenceOTU337679	0	0	0	0	0	0	0	0	0	0	0	0	0	0	0	0	0	0	0	0	0	0	0	0	0	0	0	0	0	0	0	0	0	0	0	0	0	0	0	0	0	0	0	0	0	0	0	0	0
3418930	0	0	0	0	0	0	0	0	0	0	0	0	0	0	0	0	0	0	0	0	0	0	0	0	0	0	0	0	0	0	0	0	157	0	0	0	0	0	0	0	0	0	0	0	0	0	0	0	0
New.CleanUp.ReferenceOTU66723	0	0	0	0	0	92	0	0	0	0	0	0	0	0	113	0	0	0	0	0	0	0	0	0	0	0	0	0	0	0	0	5	13	3	0	0	4	0	0	11	0	0	1116	0	0	0	0	14	0
578102	0	0	0	0	11	108	0	0	0	8	0	0	0	0	0	0	0	6	0	0	0	0	0	0	0	0	0	0	0	0	0	6	181	0	5	0	0	0	0	0	0	5	0	0	0	0	0	27	0
813921	0	0	0	0	0	44	0	0	0	0	0	0	0	0	51	0	0	0	0	0	0	0	0	0	0	0	0	0	0	0	0	0	3	5	0	0	0	0	0	0	0	0	495	0	0	0	0	4	0
New.ReferenceOTU859	0	0	0	0	0	0	0	0	0	0	0	0	0	0	0	0	0	0	0	0	0	0	0	0	0	0	0	0	0	0	0	0	3	0	0	0	0	0	0	0	0	0	144	0	0	0	0	0	0
New.CleanUp.ReferenceOTU183183	0	0	0	0	0	0	0	0	0	0	0	0	0	0	0	0	0	0	0	0	0	0	0	0	0	0	0	0	0	0	0	0	22	0	0	0	0	0	0	0	0	0	305	0	0	0	0	0	0
804682	0	0	0	0	0	0	0	0	0	0	0	0	0	0	0	0	0	0	0	0	0	0	0	0	0	0	0	0	0	0	0	0	0	0	0	0	0	0	0	0	0	0	0	0	0	0	0	0	0
211089	0	0	0	0	0	0	0	0	0	0	0	0	0	0	0	0	0	0	0	0	0	0	0	0	0	0	0	0	0	0	0	0	0	0	0	0	0	0	0	0	0	0	0	0	0	0	0	0	0
New.CleanUp.ReferenceOTU257904	0	0	0	0	0	0	0	0	0	0	0	0	0	0	0	0	0	0	0	0	0	0	0	0	0	0	0	0	0	0	0	3	0	0	0	0	0	0	0	0	0	0	0	0	0	0	0	0	0
1639372	0	0	0	0	0	0	0	0	0	0	0	0	0	0	0	0	0	0	0	0	0	0	0	0	0	0	0	0	0	0	0	0	0	0	0	0	0	0	0	0	0	0	0	0	0	0	0	0	0
New.CleanUp.ReferenceOTU15037	0	0	0	0	0	0	0	0	0	0	0	0	0	0	0	0	0	0	0	0	0	0	0	0	0	0	0	0	0	0	0	0	16	0	0	0	0	0	0	0	0	0	0	0	0	0	0	0	0
New.CleanUp.ReferenceOTU201083	0	0	0	0	0	0	0	0	0	0	0	0	0	0	0	0	0	0	0	0	0	0	0	0	0	0	0	0	0	0	0	0	5	0	0	0	0	0	0	0	0	0	0	0	0	0	0	0	0
533113	0	0	0	0	0	0	0	0	0	0	0	0	0	0	0	0	0	0	0	0	0	0	0	0	0	0	0	0	0	0	0	0	0	0	0	0	0	0	0	0	0	0	0	0	0	0	0	0	0
New.CleanUp.ReferenceOTU16815	0	0	0	0	0	0	0	0	0	0	0	0	0	0	0	0	0	0	0	0	0	0	0	0	0	0	0	0	0	0	0	0	0	0	0	0	0	0	0	0	0	0	0	0	0	0	0	0	0
New.CleanUp.ReferenceOTU160865	0	0	0	0	5	83	0	0	0	6	0	0	0	0	0	0	0	0	0	0	0	0	0	0	0	0	0	0	0	0	0	0	0	0	0	0	0	0	0	0	0	0	0	0	0	0	0	0	0
541853	0	0	0	0	0	0	0	0	0	6	0	0	0	0	0	5	0	5	0	0	0	0	0	0	0	0	0	0	0	0	3	23	48	3	7	3	0	0	0	0	0	0	0	0	0	0	3	12	0
158044	0	0	0	0	0	0	0	0	0	0	0	0	0	0	0	0	0	0	0	0	0	0	0	0	0	0	0	0	0	0	0	0	0	0	0	0	0	0	0	0	0	0	0	0	0	0	0	0	0
New.CleanUp.ReferenceOTU120849	0	0	0	0	0	0	0	0	0	0	0	0	0	0	0	0	0	0	0	0	0	0	0	0	0	0	0	0	0	0	0	0	0	0	0	0	0	0	0	0	0	0	0	0	0	0	0	0	0
990405	0	0	0	0	0	0	0	0	0	0	0	0	0	0	0	0	0	0	0	0	0	0	0	0	0	0	0	0	0	0	0	0	0	0	0	0	0	0	0	0	0	0	0	0	0	0	0	0	0
New.CleanUp.ReferenceOTU143037	0	0	0	0	0	0	0	0	0	0	0	0	0	0	0	0	0	0	0	0	0	0	0	0	0	0	0	0	0	0	0	0	0	0	0	0	0	0	0	0	0	0	0	0	0	0	0	5	0
659105	0	0	0	0	0	0	0	0	0	0	0	0	0	0	0	0	0	0	0	0	0	0	0	0	0	0	0	0	0	0	0	0	4	0	0	0	0	0	0	0	0	0	0	0	0	0	0	0	0
New.CleanUp.ReferenceOTU48020	0	0	0	0	0	0	0	0	0	8	0	0	0	0	0	0	0	0	0	0	0	0	0	0	0	0	0	0	0	0	0	0	22	0	0	0	0	0	0	0	0	0	0	0	0	0	0	0	0
4396045	0	0	0	0	0	0	0	0	0	0	0	0	0	55	0	0	0	0	0	0	0	0	0	0	0	0	0	0	0	0	3	0	0	0	0	0	0	0	0	0	0	0	0	0	0	0	0	0	0
New.CleanUp.ReferenceOTU184620	0	0	0	0	0	0	0	0	0	0	0	0	0	0	0	0	0	0	0	0	0	0	0	0	0	0	0	0	0	0	0	0	0	0	0	0	0	0	0	0	0	0	0	0	0	0	0	0	0
575472	0	0	0	0	0	0	0	0	0	0	0	0	0	0	0	0	0	0	0	0	0	0	0	0	0	0	0	0	0	0	0	0	0	0	0	0	0	0	0	0	0	0	0	0	0	0	0	0	0
New.CleanUp.ReferenceOTU253405	0	0	0	0	0	57	0	0	0	3	0	0	0	0	0	0	0	0	0	0	0	0	0	0	0	0	0	0	0	0	0	0	0	4	5	0	0	0	0	0	0	0	0	0	0	0	0	61	0
253814	0	0	0	0	0	0	0	0	0	0	0	0	0	0	0	0	0	0	0	0	0	0	0	0	0	0	0	0	0	0	0	0	0	0	0	0	0	0	0	0	0	0	0	0	0	0	0	0	0
960076	0	0	0	0	0	0	0	0	0	0	0	0	0	0	0	0	0	0	0	0	0	0	0	0	0	0	0	0	0	0	0	0	0	0	0	0	0	0	0	0	0	0	0	0	0	0	0	0	0
1072673	0	0	0	0	0	0	0	0	0	0	0	0	0	0	0	0	0	0	0	0	0	0	0	0	0	0	0	0	0	0	0	0	0	0	0	0	0	0	0	0	0	0	0	0	0	0	0	0	0
4348551	0	0	0	0	0	0	0	0	0	0	0	0	0	0	0	0	0	0	0	0	0	0	0	0	0	0	0	0	0	0	0	0	7	0	0	0	0	0	0	0	0	0	0	0	0	0	0	0	0
New.CleanUp.ReferenceOTU127759	0	0	0	0	0	0	0	0	0	0	0	0	0	0	0	0	0	0	0	0	0	0	0	0	0	0	0	0	0	0	0	0	0	0	0	0	0	0	0	0	0	0	0	0	0	0	0	0	0
4359790	0	0	0	0	0	0	0	0	0	0	0	0	0	0	0	0	0	0	0	0	0	0	0	0	0	0	0	0	0	0	0	0	0	0	0	0	0	0	0	0	0	0	0	0	0	0	0	0	0
559612	0	0	0	0	0	0	0	0	0	0	0	0	0	0	0	0	0	0	0	0	0	0	0	0	0	0	0	0	0	0	0	0	0	0	0	0	0	0	0	0	0	0	0	0	0	0	0	0	0
565425	0	0	0	0	0	0	0	0	0	0	0	0	0	0	0	0	0	0	0	0	0	0	0	0	0	0	0	0	0	0	0	0	0	0	0	0	0	0	0	0	0	0	0	0	0	0	0	0	0
544951	0	0	0	0	0	0	0	0	0	0	0	0	0	0	0	0	0	0	0	0	0	0	0	0	0	0	0	0	0	0	0	0	0	0	0	0	0	0	0	0	0	0	0	0	0	0	0	0	0
New.CleanUp.ReferenceOTU182037	0	0	0	0	0	0	0	0	0	0	0	0	0	0	0	0	0	0	0	0	0	0	0	0	0	0	0	0	0	0	0	0	5	0	0	0	0	0	0	0	0	0	0	0	0	0	0	0	0
4416103	0	0	0	0	0	0	0	0	0	0	0	0	0	0	0	0	0	0	0	0	100	0	0	0	0	0	0	0	0	0	0	0	0	0	0	0	0	0	0	0	0	0	0	0	0	0	0	0	0
362621	0	0	0	0	0	0	0	0	0	0	0	0	0	0	0	0	0	0	0	0	0	0	0	0	0	0	0	0	0	0	0	0	0	0	0	0	0	0	0	0	0	0	0	0	0	0	0	0	0
New.CleanUp.ReferenceOTU311808	0	0	0	0	0	0	0	0	0	0	0	0	0	0	0	0	0	0	0	0	0	0	0	0	0	0	0	0	0	0	0	0	0	0	0	0	0	0	0	0	0	0	0	0	0	0	0	0	0
New.CleanUp.ReferenceOTU307938	0	0	0	0	0	0	0	0	0	0	0	0	0	0	0	0	0	0	0	0	0	0	0	0	0	0	0	0	0	0	0	0	0	0	0	0	0	0	0	0	0	0	0	0	0	0	0	0	0
141821	0	0	0	0	0	0	0	0	0	0	0	0	0	0	0	0	0	0	0	0	0	0	0	0	0	0	0	0	0	0	0	0	0	0	0	0	0	0	0	0	0	0	0	0	0	0	0	0	0
544563	0	7	0	0	6	62	11	3	0	35	0	0	3	0	0	0	4	20	0	0	0	0	0	0	0	0	5	0	3	0	0	210	24	18	23	0	9	0	0	0	4	12	0	0	4	0	0	106	0
1010721	0	0	0	0	0	0	0	0	0	0	0	0	0	0	0	0	0	0	0	0	0	0	0	0	0	0	0	0	0	0	0	0	0	0	0	0	0	0	0	0	0	0	0	0	0	0	0	0	0
813781	0	0	0	0	0	0	0	0	0	0	0	0	0	0	0	0	0	0	0	0	0	0	0	0	0	0	0	0	0	0	0	0	0	0	0	0	0	0	0	0	0	0	0	0	0	0	0	0	0
New.CleanUp.ReferenceOTU347878	0	0	0	0	0	0	0	0	0	0	0	0	0	0	0	3	0	0	0	0	0	0	0	0	0	0	0	0	0	0	0	0	0	0	0	0	0	0	0	0	0	0	0	0	0	0	0	0	0
408706	0	0	0	0	0	0	0	0	0	0	0	0	0	0	0	0	0	0	0	0	0	0	0	0	0	0	0	0	0	0	0	0	0	0	0	0	0	0	0	0	0	0	0	0	0	0	0	0	0
1092833	3	0	0	0	0	0	0	0	0	0	0	0	0	0	0	0	0	0	0	0	0	0	0	0	0	0	0	0	0	0	0	6	0	0	0	0	0	0	0	0	0	0	0	0	0	0	0	0	0
583925	0	0	0	0	0	0	0	0	0	0	0	0	0	0	0	0	0	0	0	0	0	0	0	0	0	0	0	0	0	0	0	0	0	0	0	0	0	0	0	0	0	0	0	0	0	0	0	0	0
New.ReferenceOTU573	0	0	0	0	0	0	0	0	0	0	0	0	0	0	0	0	0	7	0	0	0	0	0	0	0	0	0	0	0	0	0	0	20	0	0	0	0	0	0	0	0	0	0	0	0	0	0	0	0
New.CleanUp.ReferenceOTU59345	0	0	0	0	0	0	0	0	0	0	0	0	0	0	0	0	0	0	0	0	0	0	0	0	0	0	0	0	0	0	0	0	0	0	0	0	0	0	0	0	0	0	0	0	0	0	0	0	0
673678	0	0	0	0	0	0	0	0	0	0	0	0	0	0	0	0	0	0	0	0	0	0	0	0	0	0	0	0	0	0	0	0	0	0	0	0	0	0	0	0	0	0	0	0	0	0	0	0	0
New.ReferenceOTU657	0	0	0	0	0	0	0	0	0	0	0	0	0	0	0	0	0	0	0	0	0	0	0	0	0	0	0	0	0	0	0	0	0	0	0	0	0	0	0	0	0	0	0	0	0	0	0	0	0
361902	0	0	0	0	0	0	0	0	0	0	0	0	0	0	0	0	0	0	0	0	0	0	0	0	0	0	0	0	0	0	0	0	0	0	0	0	0	0	0	0	0	0	0	0	0	0	0	0	0
661111	0	0	0	0	0	0	0	0	0	0	0	0	0	0	0	0	0	0	0	0	0	0	0	0	0	0	0	0	0	0	0	0	0	0	0	0	0	0	0	0	0	0	0	0	0	0	0	0	0
812243	0	0	0	0	0	0	0	0	0	0	0	0	0	0	0	0	0	0	0	0	0	0	0	0	0	0	0	0	0	0	0	0	0	0	0	0	0	0	0	0	0	0	0	0	0	0	0	0	0
823453	0	0	0	0	0	0	0	0	0	0	0	0	0	0	0	0	0	0	0	0	0	0	0	0	0	0	0	0	0	0	0	0	0	0	0	0	0	0	0	0	0	0	0	0	0	0	0	0	0
232505	0	0	0	0	0	0	0	0	0	0	0	0	0	0	0	0	0	0	0	0	0	0	0	0	0	0	0	0	0	0	0	0	0	0	0	0	0	0	0	0	0	0	0	0	0	0	0	0	0
New.CleanUp.ReferenceOTU259923	0	0	0	0	0	0	0	0	0	0	0	0	0	0	0	0	0	0	0	0	0	0	0	0	0	0	0	0	0	0	0	0	0	0	0	0	0	0	0	0	0	0	0	0	0	0	0	0	0
1032692	0	0	0	0	0	0	0	0	0	0	0	0	0	0	0	0	0	0	0	0	0	0	0	0	0	0	0	0	0	0	0	0	0	0	0	0	0	0	0	0	0	0	0	0	0	0	0	0	0
891031	0	0	0	0	0	0	0	0	0	0	0	0	0	0	0	0	0	0	0	0	0	0	0	0	0	0	0	0	0	0	0	0	0	0	0	0	0	0	0	0	0	0	0	0	0	0	0	0	0
New.CleanUp.ReferenceOTU288983	0	0	0	0	0	0	0	0	0	0	0	0	0	0	0	0	0	0	0	0	0	0	0	0	0	0	0	0	0	0	0	0	0	0	0	0	0	0	0	0	0	0	0	0	0	0	0	0	0
New.CleanUp.ReferenceOTU187980	0	0	0	0	0	0	0	0	0	0	0	0	0	0	0	0	0	0	0	0	0	0	0	0	0	0	0	0	0	0	0	0	0	0	0	0	0	0	0	0	0	0	0	0	0	0	0	0	0
558023	0	0	0	0	0	19	3	5	0	19	0	0	0	0	0	28	3	9	140	0	0	0	0	13	0	0	0	0	0	0	0	243	120	14	31	5	3	0	0	0	8	52	0	0	19	0	4	69	14
New.ReferenceOTU984	0	0	0	0	0	0	0	0	0	3	0	0	0	0	0	32	0	13	0	0	0	0	0	0	0	0	0	0	0	0	0	0	364	62	0	0	0	0	0	0	0	0	0	0	0	0	0	0	0
New.ReferenceOTU541	0	0	0	0	0	0	0	0	0	0	0	0	0	0	0	0	0	0	0	0	0	0	0	0	0	0	0	0	0	0	0	0	0	0	0	0	0	0	0	0	0	0	0	0	0	0	0	0	0
799231	0	0	0	0	0	0	0	0	0	0	0	0	0	0	0	0	0	0	0	0	0	0	0	0	0	0	0	0	0	0	0	0	0	0	0	0	0	0	0	0	0	0	0	0	0	0	0	0	0
New.ReferenceOTU1148	0	0	0	0	0	0	0	0	0	0	0	0	0	0	0	0	0	0	0	0	0	0	0	0	0	0	0	0	0	0	0	0	0	0	0	0	0	0	0	0	0	0	0	0	0	0	0	0	0
New.ReferenceOTU468	0	0	0	0	0	0	0	0	0	0	0	0	0	0	0	0	0	0	0	0	0	0	0	0	0	0	0	0	0	0	0	0	0	0	0	0	0	0	0	0	0	0	0	0	0	0	0	0	0
New.CleanUp.ReferenceOTU237118	0	0	0	0	0	0	0	0	0	0	0	0	0	0	0	0	0	0	0	0	0	0	0	0	0	0	0	0	0	0	0	0	0	0	0	0	0	0	0	0	0	0	0	0	0	0	0	0	0
New.ReferenceOTU873	0	0	0	0	0	0	0	0	0	0	0	0	0	0	0	0	0	0	0	0	0	0	0	0	0	0	0	0	0	0	0	0	0	0	0	0	0	0	0	0	0	0	0	0	0	0	0	0	0
257647	0	0	0	0	0	0	0	0	0	0	0	0	0	0	0	0	0	0	0	0	0	0	0	0	0	0	0	0	0	0	0	0	0	0	0	0	0	0	0	0	0	0	0	0	0	0	0	0	0
New.CleanUp.ReferenceOTU261972	0	0	0	0	0	0	0	0	0	0	0	0	0	0	0	0	0	0	0	0	0	0	0	0	0	0	0	0	0	0	0	0	0	0	0	0	0	0	0	0	0	0	0	0	0	0	0	0	0
New.CleanUp.ReferenceOTU298850	0	0	0	0	0	0	0	0	0	0	0	0	0	0	0	0	0	0	0	0	0	0	0	0	0	0	0	0	0	0	0	0	0	0	0	0	0	0	0	0	0	0	0	0	0	0	0	0	0
New.CleanUp.ReferenceOTU313488	0	0	0	0	0	0	0	0	0	0	0	0	0	0	0	0	0	0	0	0	0	0	0	0	0	0	0	0	0	0	0	0	0	0	0	0	0	0	0	0	0	0	0	0	0	0	0	0	0
New.CleanUp.ReferenceOTU73687	0	0	0	0	0	0	0	0	0	0	0	0	0	0	0	0	0	0	0	0	0	0	0	0	0	0	0	0	0	0	0	0	0	0	0	0	0	0	0	0	0	0	0	0	0	0	0	0	0
661793	0	0	0	0	0	0	0	0	0	0	0	0	0	0	0	0	0	0	0	0	0	0	0	0	0	0	0	0	0	0	0	0	0	0	0	0	0	0	0	0	0	0	0	0	0	0	0	0	0
1142826	0	0	0	0	0	0	0	0	0	0	0	0	0	0	0	0	0	0	0	0	0	0	0	0	0	0	0	0	0	0	0	0	0	0	0	0	0	0	0	0	0	0	0	0	0	0	0	0	0
814594	0	0	0	0	0	0	0	0	0	0	0	0	0	0	0	0	0	0	0	0	0	0	0	0	0	0	0	0	0	0	0	0	0	0	0	0	0	0	0	0	0	0	0	0	0	0	0	0	0
New.CleanUp.ReferenceOTU201793	0	0	0	0	0	0	0	0	0	0	0	0	0	0	0	0	0	0	0	0	0	0	0	0	0	0	0	0	0	0	0	0	0	0	0	0	0	0	0	0	0	0	0	0	0	0	0	0	0
4416962	0	0	0	0	0	0	0	0	0	0	0	0	0	0	0	0	0	0	0	0	0	0	0	0	0	0	0	0	0	0	0	0	0	0	0	0	0	0	0	0	0	0	0	0	0	0	0	0	0
New.ReferenceOTU27	0	0	0	0	0	0	0	0	0	0	0	0	0	0	0	0	0	0	0	0	0	0	0	0	0	0	0	0	0	0	0	0	0	0	0	0	0	0	0	0	0	0	0	0	0	0	0	0	0
New.CleanUp.ReferenceOTU1097	0	0	0	0	0	0	0	0	0	0	0	0	0	0	0	0	0	0	0	0	0	0	0	0	0	0	0	0	0	0	0	0	0	0	0	0	0	0	0	0	0	0	0	0	0	0	0	0	0
New.CleanUp.ReferenceOTU229573	0	0	0	0	0	0	0	0	0	0	0	0	0	0	0	3	0	0	11	0	0	0	0	0	0	0	0	0	0	0	0	7	3	0	0	0	0	0	0	0	0	0	0	0	0	0	0	0	0
New.CleanUp.ReferenceOTU114255	0	0	0	0	0	0	0	0	0	0	0	0	0	0	0	0	0	0	0	0	0	0	0	0	0	0	0	0	0	0	0	0	0	0	0	0	0	0	0	0	0	0	0	0	0	0	0	0	0
New.CleanUp.ReferenceOTU153216	0	0	0	0	0	0	0	0	0	0	0	0	0	0	0	0	0	0	0	0	0	0	0	0	0	0	0	0	0	0	0	0	0	0	0	0	0	0	0	0	0	0	0	0	0	0	0	0	0
New.CleanUp.ReferenceOTU177392	0	0	0	0	0	0	0	0	0	0	0	0	0	0	0	0	0	0	0	0	0	0	0	0	0	0	0	0	0	0	0	0	0	0	0	0	0	0	0	0	0	0	0	0	0	0	0	0	0
New.CleanUp.ReferenceOTU205835	0	0	0	0	0	0	0	0	0	0	0	0	0	0	0	0	0	0	0	0	0	0	0	0	0	0	0	0	0	0	0	0	0	0	0	0	0	0	0	0	0	0	0	0	0	0	0	0	0
New.CleanUp.ReferenceOTU342480	0	0	0	0	0	0	0	0	0	0	0	0	0	0	0	0	0	0	0	0	0	0	0	0	0	0	0	0	0	0	0	0	0	0	0	0	0	0	0	0	0	0	0	0	0	0	0	0	0
New.ReferenceOTU439	0	0	0	0	0	0	0	0	0	0	0	0	0	0	0	0	0	0	0	0	0	0	0	0	0	0	0	0	0	0	0	0	0	0	0	0	0	0	0	0	0	0	0	0	0	0	0	0	0
New.CleanUp.ReferenceOTU108188	0	0	0	0	0	0	0	0	0	0	0	0	0	0	0	0	0	0	0	0	0	0	0	0	0	0	0	0	0	0	0	0	0	0	0	0	0	0	0	0	0	0	598	0	0	0	0	0	0
4394913	0	0	0	0	0	0	0	0	0	0	0	0	0	0	0	0	0	0	0	0	0	0	0	0	0	0	0	0	0	0	0	0	0	0	0	0	0	0	0	0	0	0	0	0	0	0	0	0	0
New.ReferenceOTU43	0	0	0	0	0	0	0	0	0	0	0	0	0	0	0	0	0	0	0	0	0	0	0	0	0	0	0	0	0	0	0	0	0	0	0	0	0	0	0	0	0	0	0	0	0	0	0	0	0
New.CleanUp.ReferenceOTU327892	0	0	0	0	0	0	0	0	0	0	0	0	0	0	0	0	0	0	0	0	0	0	0	0	0	0	0	0	0	0	0	0	0	0	0	0	0	0	0	0	0	0	0	0	0	0	0	0	0
New.CleanUp.ReferenceOTU230798	0	0	0	0	0	0	0	0	0	0	0	0	0	0	0	0	0	0	0	0	0	0	0	0	0	0	0	0	0	0	0	0	0	0	0	0	0	0	0	0	0	0	0	0	0	0	0	0	0
New.CleanUp.ReferenceOTU243429	0	0	0	0	0	0	0	0	0	0	0	0	0	0	0	0	0	0	0	0	0	0	0	0	0	0	0	0	0	0	0	0	0	0	0	0	0	0	0	0	0	0	0	0	0	0	0	0	0
New.ReferenceOTU583	0	0	0	0	0	0	0	0	0	0	0	0	0	0	0	0	0	0	0	0	0	0	0	0	0	0	0	0	0	0	0	0	0	0	0	0	0	0	0	0	0	0	0	0	0	0	0	0	0
2970575	0	0	0	0	0	0	0	0	0	8	0	0	0	0	147	0	3	0	0	0	0	0	3	0	0	5	0	0	0	0	0	0	36	0	8	0	3	0	0	0	0	3	0	0	0	0	0	12	0
New.CleanUp.ReferenceOTU268118	0	3	0	0	0	32	0	0	0	12	0	0	0	0	0	0	0	0	0	0	0	0	0	0	0	0	0	0	0	0	0	8	41	0	3	0	0	0	0	0	3	0	0	0	0	0	0	3	0
818174	0	0	0	0	0	0	0	0	0	0	0	0	0	0	0	0	0	0	0	0	0	0	0	0	0	0	0	0	0	0	0	0	0	0	0	0	0	0	0	0	0	0	0	0	0	0	0	0	0
New.CleanUp.ReferenceOTU24001	0	0	0	0	0	0	0	0	0	0	0	0	0	0	0	0	0	0	0	0	0	0	0	0	0	0	0	0	0	0	0	0	0	0	0	0	0	0	0	0	0	0	0	0	0	0	0	0	0
New.CleanUp.ReferenceOTU216495	0	0	0	0	0	0	0	0	0	0	0	0	0	0	0	0	0	0	0	0	0	0	0	0	0	0	0	0	0	0	0	0	0	0	0	0	0	0	0	0	0	0	0	0	0	0	0	0	0
688887	0	0	0	0	0	0	0	0	0	0	0	0	0	0	0	0	0	0	0	0	0	0	0	0	0	0	0	0	0	0	0	0	0	0	0	0	0	0	0	0	0	0	0	0	0	0	0	0	0
141712	0	0	0	0	0	45	0	0	0	7	0	0	0	0	0	0	0	0	0	0	0	0	0	0	0	0	0	0	0	0	0	0	0	0	0	0	0	0	0	0	0	0	0	0	0	0	0	0	0
4170478	0	0	0	0	0	0	0	0	0	0	0	0	0	0	0	0	0	0	0	0	0	0	0	0	0	0	0	0	0	0	0	0	0	0	0	0	0	0	0	0	0	0	0	0	0	0	0	0	0
New.CleanUp.ReferenceOTU290966	0	0	0	0	0	0	0	0	0	0	0	0	0	0	0	0	0	0	0	0	0	0	0	0	0	0	0	0	0	0	0	0	0	0	0	0	0	0	0	0	0	0	0	0	0	0	0	0	0
New.ReferenceOTU224	0	0	0	0	0	0	3	0	0	3	0	0	0	585	0	0	0	0	1316	0	21	0	0	0	0	25	0	0	0	0	0	0	0	8	0	0	0	3	0	0	0	0	1304	0	0	0	0	0	0
New.ReferenceOTU192	0	0	0	0	0	0	0	0	0	0	0	0	0	0	182	0	0	0	947	0	0	0	4	0	0	0	0	0	0	0	0	0	0	0	0	0	0	0	0	0	0	0	0	0	0	0	0	0	0
New.ReferenceOTU808	0	0	0	0	0	0	0	0	0	0	0	0	0	0	0	0	0	0	0	0	0	0	0	0	0	0	0	0	0	0	0	0	0	0	0	0	0	0	0	0	0	0	0	0	0	0	0	0	0
New.CleanUp.ReferenceOTU179717	0	0	0	0	0	0	0	0	0	0	0	0	0	0	0	0	0	0	0	0	0	0	0	0	0	0	0	0	0	0	0	0	0	0	0	0	0	0	0	0	0	0	0	0	0	0	0	0	0
New.CleanUp.ReferenceOTU45869	0	0	0	0	0	0	0	0	0	0	0	0	0	0	0	0	0	0	0	0	0	0	0	0	0	0	0	0	0	0	0	0	0	0	0	0	0	0	0	0	0	0	0	0	0	0	0	0	0
New.CleanUp.ReferenceOTU194946	0	0	0	0	0	0	0	0	0	0	0	0	0	0	0	0	0	0	0	0	0	0	0	0	0	0	0	0	0	0	0	0	0	0	0	0	0	0	0	0	0	0	0	0	0	0	0	0	0
New.ReferenceOTU1128	0	0	0	0	0	0	0	0	0	0	0	0	0	0	0	0	0	0	0	0	0	0	0	0	0	0	0	0	0	0	0	0	0	0	0	0	0	0	0	0	0	0	0	0	0	0	0	0	0
New.CleanUp.ReferenceOTU49196	0	0	0	0	0	0	0	0	0	0	0	0	0	0	0	0	0	0	0	0	0	0	0	0	0	0	0	0	0	0	0	0	0	0	0	0	0	0	0	0	0	0	0	0	0	0	0	0	0
New.ReferenceOTU53	0	0	0	0	0	0	0	0	0	0	0	0	0	0	0	0	0	0	0	0	0	0	0	0	0	0	0	0	0	0	0	0	0	0	0	0	0	0	0	0	0	0	0	0	0	0	0	0	0
New.CleanUp.ReferenceOTU150713	0	0	0	0	0	0	0	0	0	0	0	0	0	0	0	0	0	0	0	0	0	0	0	0	0	0	0	0	0	0	0	0	0	0	0	0	0	0	0	0	0	0	0	0	0	0	0	0	0
New.CleanUp.ReferenceOTU203666	0	0	0	0	0	0	0	0	0	0	0	0	0	0	0	0	0	0	0	0	0	0	0	0	0	0	0	0	0	0	0	0	0	0	0	0	0	0	0	0	0	0	0	0	0	0	0	0	0
New.CleanUp.ReferenceOTU318678	0	0	0	0	0	0	0	0	0	0	0	0	0	0	0	0	0	0	0	0	0	0	0	0	0	0	0	0	0	0	0	0	0	0	0	0	0	0	0	0	0	0	0	0	0	0	0	0	0
New.CleanUp.ReferenceOTU42725	0	0	0	0	0	0	0	0	0	0	0	0	0	0	0	0	0	0	0	0	0	0	0	0	0	0	0	0	0	0	0	0	0	0	0	0	0	0	0	0	0	0	0	0	0	0	0	0	0
New.CleanUp.ReferenceOTU200857	0	0	0	0	0	0	0	0	0	0	0	0	0	0	0	0	0	0	0	0	0	0	0	0	0	0	0	0	0	0	0	0	0	0	0	0	0	0	0	0	0	0	0	0	0	0	0	0	0
New.CleanUp.ReferenceOTU205399	0	0	0	0	0	0	0	0	0	0	0	0	0	180	0	0	0	0	0	0	0	0	0	0	4	0	0	0	0	0	0	0	0	5	0	0	0	0	0	0	0	0	0	0	0	0	0	0	0
New.CleanUp.ReferenceOTU45581	0	0	0	0	0	0	0	0	0	0	0	0	0	0	0	0	0	0	0	0	0	0	0	0	0	0	0	0	0	0	0	0	0	0	0	0	0	0	0	0	0	0	0	0	0	0	0	0	0
New.CleanUp.ReferenceOTU251765	0	0	0	0	0	0	0	0	0	0	0	0	0	0	0	0	0	0	0	0	0	0	0	0	0	0	0	0	0	0	0	0	0	0	0	0	0	0	0	0	0	0	0	0	0	0	0	0	0
New.CleanUp.ReferenceOTU280253	0	0	0	0	0	0	0	0	0	0	0	0	0	0	0	0	0	0	0	0	0	0	0	0	0	0	0	0	0	0	0	0	0	0	0	0	0	0	0	0	0	0	0	0	0	0	0	0	0
New.CleanUp.ReferenceOTU80656	0	0	0	0	0	0	0	0	0	0	0	0	0	0	0	0	0	0	0	0	0	0	0	0	0	0	0	0	0	0	0	0	0	0	0	0	0	0	0	0	0	0	0	0	0	0	0	0	0
New.CleanUp.ReferenceOTU31311	0	0	0	0	0	0	0	0	0	0	0	0	0	0	0	0	0	0	0	0	0	0	0	0	0	0	0	0	0	0	0	0	0	0	0	0	0	0	0	0	0	0	0	0	0	0	0	0	0
New.ReferenceOTU734	0	0	0	0	0	0	0	0	0	0	0	0	0	0	0	0	0	0	0	0	0	0	0	0	0	0	0	0	0	0	0	0	0	0	0	0	0	0	0	0	0	0	0	0	0	0	0	0	0
New.CleanUp.ReferenceOTU120266	0	0	0	0	0	0	0	0	0	0	0	0	0	0	0	0	0	0	0	0	0	0	0	0	0	0	0	0	0	0	0	0	0	0	0	0	0	0	0	0	0	0	0	0	0	0	0	0	0
New.CleanUp.ReferenceOTU351941	0	0	0	0	0	0	0	0	0	0	0	0	0	0	0	0	0	0	0	0	0	0	0	0	0	0	0	0	0	0	0	0	0	0	0	0	0	0	0	0	0	0	0	0	0	0	0	0	0
New.ReferenceOTU950	0	0	0	0	0	0	0	0	0	0	0	0	0	0	0	0	0	0	0	0	0	0	0	0	0	0	0	0	0	0	0	0	0	0	0	0	0	0	0	0	0	0	0	0	0	0	0	0	0
583949	0	0	0	0	0	0	0	0	0	5	0	0	0	0	0	0	0	0	0	0	0	0	0	0	0	0	0	0	0	0	0	0	0	0	0	0	0	0	0	0	0	0	0	0	0	0	0	0	0
New.ReferenceOTU600	0	0	0	0	0	0	0	0	0	0	0	0	0	0	0	0	0	0	0	0	0	0	0	0	0	0	0	0	0	0	0	0	0	0	0	0	0	0	0	0	0	0	0	0	0	0	0	0	0
New.ReferenceOTU650	0	0	0	0	0	0	0	0	0	0	0	0	0	0	0	0	0	0	0	0	0	0	0	0	0	0	0	0	0	0	0	0	0	0	0	0	0	0	0	0	0	0	0	0	0	0	0	0	0
New.ReferenceOTU1022	0	0	0	0	0	0	0	0	0	0	0	0	0	0	0	0	0	0	0	0	0	0	0	0	0	0	0	0	0	0	0	0	0	0	0	0	0	0	0	0	0	0	0	0	0	0	0	0	0
New.ReferenceOTU1030	0	0	0	0	0	0	0	0	0	0	0	0	0	0	0	0	0	0	0	0	0	0	0	0	0	0	0	0	0	0	0	0	0	0	0	0	0	0	0	0	0	0	0	0	0	0	0	0	0
New.CleanUp.ReferenceOTU217203	0	0	0	0	0	0	0	0	0	0	0	0	0	0	0	0	0	0	0	0	0	0	0	0	0	0	0	0	0	0	0	0	0	0	0	0	0	0	0	0	0	0	0	0	0	0	0	0	0
New.CleanUp.ReferenceOTU345111	0	0	0	0	0	0	0	0	0	0	0	0	0	0	0	0	0	0	0	0	0	0	0	0	0	0	0	0	0	0	0	0	0	0	0	0	0	0	0	0	0	0	0	0	0	0	0	0	0
New.CleanUp.ReferenceOTU85626	0	0	0	0	0	0	0	0	0	0	0	0	0	0	0	0	0	0	0	0	0	0	0	0	0	0	0	0	0	0	0	0	0	0	0	0	0	0	0	0	0	0	0	0	0	0	0	0	0
New.CleanUp.ReferenceOTU200594	0	0	0	0	0	0	0	0	0	0	0	0	0	0	0	0	0	0	0	0	0	0	0	0	0	0	0	0	0	0	0	0	21	0	0	0	0	0	0	0	0	0	0	0	0	0	0	0	0
New.CleanUp.ReferenceOTU292863	0	4	0	0	0	0	0	0	0	0	0	0	0	0	0	0	0	0	0	0	0	0	0	0	0	0	0	0	0	0	0	133	0	0	0	0	0	0	0	0	0	0	0	0	0	0	0	0	0
New.CleanUp.ReferenceOTU151307	0	0	0	0	0	0	0	0	0	0	0	0	0	0	0	0	0	0	0	0	0	0	0	0	0	0	0	0	0	0	0	0	0	0	0	0	0	0	0	0	0	0	0	0	0	0	0	0	0
New.CleanUp.ReferenceOTU212423	0	0	0	0	0	0	0	0	0	0	0	0	0	0	0	0	0	0	0	0	0	0	0	0	0	0	0	0	0	0	0	0	0	0	0	0	0	0	0	0	0	0	0	0	0	0	0	0	0
New.CleanUp.ReferenceOTU44583	0	0	0	0	0	0	0	0	0	0	0	0	0	0	0	0	0	0	0	0	0	0	0	0	0	0	0	0	0	0	0	0	0	0	0	0	0	0	0	0	0	0	0	0	0	0	0	0	0
New.CleanUp.ReferenceOTU55475	0	0	0	0	0	0	0	0	0	0	0	0	0	0	0	0	0	0	0	0	0	0	0	0	0	0	0	0	0	0	0	0	0	0	0	0	0	0	0	0	0	0	0	0	0	0	0	0	0
New.CleanUp.ReferenceOTU354240	0	0	0	0	0	0	0	0	0	0	0	0	0	0	0	0	0	0	0	0	0	0	0	0	0	0	0	0	0	0	0	0	0	0	0	0	0	0	0	0	0	0	0	0	0	0	0	0	0
2935	0	0	0	0	0	0	0	0	0	0	0	0	0	0	0	0	0	0	0	0	0	0	0	0	0	0	0	0	0	0	0	0	13	0	0	0	0	0	0	0	0	0	0	0	0	0	0	0	0
New.CleanUp.ReferenceOTU142602	0	0	0	0	0	0	0	0	0	0	0	0	0	0	0	0	0	0	0	0	0	0	0	0	0	0	0	0	0	0	0	0	0	0	0	0	0	0	0	0	0	0	0	0	0	0	0	0	0
New.CleanUp.ReferenceOTU48987	0	0	0	0	0	0	0	0	0	0	0	0	0	0	0	0	0	0	0	0	0	0	0	0	0	0	0	0	0	0	0	0	0	0	0	0	0	0	0	0	0	0	0	0	0	0	0	0	0
578784	0	0	0	0	0	48	0	0	0	0	0	0	0	0	0	0	0	0	0	0	0	0	0	0	0	0	0	0	0	0	0	0	51	0	0	0	0	0	0	0	0	0	0	0	0	0	0	0	0
817380	0	0	0	0	0	0	0	0	0	3	0	0	0	0	0	0	0	0	0	0	0	0	4	0	0	0	0	0	0	0	0	4	3	0	0	0	0	0	0	0	0	0	0	0	0	0	0	6	0
103210	0	0	0	0	0	0	0	0	0	0	0	0	0	0	0	0	0	0	0	0	0	0	0	0	0	0	0	0	0	0	0	0	0	0	0	0	0	0	0	0	0	0	0	0	0	0	0	0	0
New.CleanUp.ReferenceOTU186127	0	0	0	0	0	0	0	0	0	0	0	0	0	0	0	0	0	0	0	0	0	0	0	0	0	0	0	0	0	0	0	0	0	0	0	0	0	0	0	0	0	0	0	0	0	0	0	0	0
New.CleanUp.ReferenceOTU271703	0	0	0	0	0	0	0	0	0	0	0	0	0	0	0	0	0	0	0	0	0	0	0	0	0	0	0	0	0	0	0	0	0	0	0	0	0	0	0	0	0	0	0	0	0	0	0	0	0
160290	0	0	0	0	0	0	0	0	0	0	0	0	0	0	0	0	0	0	0	0	0	0	0	0	0	0	0	0	0	0	0	0	0	0	0	0	0	0	0	0	0	0	0	0	0	0	0	0	0
1118855	0	0	0	0	0	0	0	0	0	6	0	0	0	0	86	0	0	0	0	0	0	0	3	0	0	0	0	96	0	0	0	72	15	0	7	0	0	0	0	0	0	0	0	0	0	0	0	0	0
New.ReferenceOTU254	0	0	0	0	0	0	0	0	0	0	0	0	0	0	0	0	0	0	0	0	0	0	0	0	0	0	0	25	0	0	0	0	3	0	0	0	0	0	0	0	0	0	0	0	0	0	0	0	0
New.CleanUp.ReferenceOTU89171	0	0	0	0	0	0	0	0	0	0	0	0	0	0	0	0	0	0	0	0	0	0	0	0	0	0	0	0	0	0	0	0	0	0	0	3	0	0	0	0	0	0	0	0	0	0	0	0	0
570248	0	0	0	0	0	0	0	0	0	0	0	0	0	0	0	0	0	0	0	0	0	0	0	0	0	0	0	0	0	0	0	7	0	0	0	0	0	0	0	0	0	0	0	0	0	0	0	0	0
New.CleanUp.ReferenceOTU171162	0	0	0	0	0	0	0	0	0	0	0	0	0	0	0	0	0	0	0	0	0	0	0	0	0	0	0	14	0	0	0	14	0	0	0	0	0	0	0	0	0	0	0	0	0	0	0	0	0
New.CleanUp.ReferenceOTU288244	0	0	0	0	0	0	0	0	0	0	0	0	0	0	0	0	0	0	0	0	0	0	0	0	0	0	0	0	0	0	0	0	0	0	0	0	0	0	0	0	0	0	0	0	0	0	0	0	0
143650	0	0	0	0	0	0	0	0	0	0	0	0	0	0	0	0	0	0	0	0	0	0	0	0	0	0	0	0	0	0	0	0	0	0	0	0	0	0	0	0	0	0	0	0	0	0	0	0	0
New.CleanUp.ReferenceOTU345822	0	0	0	0	0	17	0	0	0	0	0	0	0	0	0	0	0	0	0	0	0	0	0	0	0	6	0	0	0	0	0	0	0	0	0	0	0	0	0	0	0	0	0	0	0	0	0	0	0
591106	0	0	0	0	0	0	0	0	0	0	0	0	0	18	0	0	0	0	0	0	0	0	0	0	0	0	0	0	0	0	0	0	0	0	0	0	0	0	0	0	0	0	0	0	0	0	0	0	0
New.CleanUp.ReferenceOTU190652	0	0	0	0	0	0	0	0	0	0	0	0	0	0	0	0	0	0	0	0	0	0	0	0	0	0	0	0	0	0	0	0	0	0	0	0	0	0	0	0	0	0	0	0	0	0	0	0	0
New.CleanUp.ReferenceOTU201136	0	0	0	0	0	0	0	0	0	0	0	0	0	0	0	0	0	0	0	0	0	0	0	0	0	0	0	10	0	0	0	0	12	0	0	4	0	0	0	0	0	0	0	0	0	0	0	0	0
New.ReferenceOTU1036	0	0	0	0	0	0	0	0	0	0	0	0	0	0	0	0	0	0	0	0	0	0	0	0	0	0	0	0	0	0	0	0	0	0	0	0	0	0	0	0	0	0	0	0	0	0	0	0	0
New.CleanUp.ReferenceOTU102359	0	0	0	0	0	0	0	0	0	0	0	0	0	0	0	0	0	0	0	0	0	0	0	0	0	0	0	0	0	0	0	0	0	0	0	0	0	0	0	0	0	0	0	0	0	0	0	0	0
New.CleanUp.ReferenceOTU265402	0	0	0	0	0	0	0	0	0	0	0	0	3	0	0	0	0	0	0	0	0	0	0	0	0	0	0	0	0	0	0	6	25	0	0	3	0	0	0	0	0	0	0	0	0	0	0	0	0
New.CleanUp.ReferenceOTU51525	0	0	0	0	0	0	0	0	0	0	0	0	0	0	0	0	0	0	0	0	0	0	8	0	0	0	0	0	0	0	0	0	25	0	0	0	0	0	0	0	4	0	0	0	0	0	0	0	0
New.CleanUp.ReferenceOTU46573	0	0	0	0	0	0	0	0	0	0	0	0	0	0	0	0	0	0	0	0	0	0	0	0	0	0	0	0	0	0	0	0	0	0	0	0	0	0	0	0	0	0	0	0	0	0	0	0	0
New.ReferenceOTU549	0	0	0	0	0	0	0	0	0	0	0	0	0	0	0	0	0	0	0	0	0	0	0	0	0	0	0	0	0	0	0	0	0	0	0	0	0	0	0	0	0	0	0	0	0	0	0	0	0
New.CleanUp.ReferenceOTU175236	0	0	0	0	0	0	0	0	0	0	0	0	0	0	0	0	0	0	0	0	0	0	0	0	0	0	0	0	0	0	0	0	0	0	0	0	0	0	0	0	0	0	0	0	0	0	0	0	0
New.CleanUp.ReferenceOTU216345	0	3	0	0	0	0	0	0	0	0	0	0	0	0	0	0	0	0	0	0	0	0	0	0	0	3	0	60	0	0	0	0	0	0	0	0	0	0	0	0	0	0	0	0	0	0	0	0	0
542211	0	0	0	0	0	0	0	0	0	0	0	0	0	0	0	0	0	0	0	0	0	0	0	0	0	0	0	0	0	0	0	0	14	0	0	0	0	0	0	0	0	0	0	0	0	0	0	0	0
New.ReferenceOTU586	0	0	0	0	0	0	0	0	0	0	0	0	0	0	0	0	0	0	0	0	0	0	0	0	0	0	0	0	0	0	0	0	0	0	0	0	0	0	0	0	0	0	0	0	0	0	0	0	0
New.CleanUp.ReferenceOTU87687	0	0	0	0	0	0	0	0	0	0	0	0	0	0	0	0	0	0	0	0	0	0	0	0	0	0	0	0	0	0	0	0	0	0	0	0	0	0	0	0	0	0	0	0	0	0	0	0	0
263136	0	0	0	0	0	0	0	0	0	3	0	0	0	0	0	0	0	0	0	0	0	0	3	0	3	0	0	83	3	0	0	36	6	0	0	0	0	3	0	0	0	0	0	0	0	0	0	7	0
509986	0	0	0	0	0	0	0	0	0	0	0	0	0	0	0	0	0	0	0	0	0	0	0	0	0	0	0	0	0	0	0	0	0	0	0	0	0	0	0	0	0	0	0	0	0	0	0	0	0
1117883	0	0	0	0	0	0	0	0	0	0	0	0	0	0	0	0	0	0	0	0	0	0	0	0	0	0	0	0	0	0	0	0	0	0	0	0	0	0	0	0	0	0	0	0	0	0	0	0	0
New.CleanUp.ReferenceOTU76226	0	0	0	0	0	0	0	0	0	0	0	0	0	0	0	0	0	0	0	0	0	0	0	0	0	0	0	0	0	0	0	0	0	0	0	0	0	0	0	0	0	0	0	0	0	0	0	0	0
New.ReferenceOTU655	0	0	0	0	0	0	0	0	0	0	0	0	0	0	0	0	0	0	0	0	0	0	0	0	0	0	0	0	0	0	0	0	0	0	0	0	0	0	0	0	0	0	0	0	0	0	0	0	0
New.ReferenceOTU777	0	0	0	0	0	0	0	0	0	0	0	0	0	0	0	0	0	0	0	0	0	0	0	0	0	0	0	0	0	0	0	0	0	0	0	0	0	0	0	0	0	0	0	0	0	0	0	0	0
1144835	0	0	0	0	0	0	0	0	0	0	0	0	0	0	0	0	0	0	0	0	0	0	0	0	0	0	0	0	0	0	0	0	0	0	0	0	0	0	0	0	0	0	0	0	0	0	0	0	0
New.CleanUp.ReferenceOTU59946	0	0	0	0	0	0	0	0	0	0	0	0	0	0	0	0	0	0	0	0	0	0	0	0	0	0	0	0	0	0	0	0	21	0	0	0	0	0	0	0	0	0	0	0	0	0	0	0	0
New.CleanUp.ReferenceOTU271880	0	0	0	0	0	0	0	0	0	0	0	0	0	0	0	0	0	0	0	0	0	0	0	0	0	0	0	0	0	0	0	0	12	0	0	0	0	0	0	0	0	0	0	0	0	0	0	0	0
549961	0	0	0	0	0	0	0	0	0	0	0	0	0	0	0	0	0	0	0	0	0	0	0	0	0	0	0	0	0	0	0	0	0	0	0	0	0	0	0	0	0	0	0	0	0	0	0	0	0
572498	0	0	0	0	0	0	0	0	0	0	0	0	0	0	0	0	0	0	0	0	0	0	0	0	0	0	0	0	0	0	0	0	0	0	0	0	0	0	0	0	0	0	0	0	0	0	0	0	0
563339	0	3	0	0	0	0	0	0	0	0	0	0	0	0	0	0	0	0	0	0	0	0	0	0	0	0	0	0	0	0	0	0	3	0	0	0	0	0	0	0	0	0	0	0	0	0	0	0	0
New.CleanUp.ReferenceOTU36326	0	0	0	0	0	0	0	0	0	0	0	0	0	0	0	0	0	0	0	0	0	0	0	0	0	0	0	0	0	0	0	0	0	0	0	0	0	0	0	0	0	0	0	0	0	0	0	0	0
822613	0	0	0	0	0	0	0	0	0	0	0	0	0	0	0	0	0	0	0	0	0	0	0	0	0	0	0	0	0	0	0	0	0	0	0	0	0	0	0	0	0	0	0	0	0	0	0	0	0
New.CleanUp.ReferenceOTU204012	0	0	0	0	0	0	0	0	0	0	0	0	0	0	0	0	0	0	0	0	0	0	0	0	0	0	0	0	0	0	0	0	0	0	0	0	0	0	0	0	0	0	0	0	0	0	0	4	0
New.CleanUp.ReferenceOTU19294	0	0	0	0	0	0	0	0	0	0	0	0	0	0	0	0	0	0	0	0	0	0	0	0	0	0	0	55	0	0	0	3	19	0	0	0	0	0	0	0	0	0	0	0	0	0	0	6	0
New.CleanUp.ReferenceOTU3261	0	0	0	0	0	0	0	0	0	0	0	0	0	0	0	0	0	0	0	0	0	0	0	0	0	0	0	0	0	0	0	0	0	0	0	0	0	0	0	0	0	0	0	0	0	0	0	0	0
741097	0	0	0	0	0	0	0	0	0	0	0	0	0	0	0	9	0	7	0	0	0	3	0	0	15	0	0	44	0	0	8	17	7	12	0	0	0	0	0	0	0	0	0	5	0	0	4	4	0
1009857	0	0	0	0	0	0	0	0	0	0	0	0	0	0	0	0	0	0	0	0	0	0	0	0	0	0	0	0	0	0	0	0	0	0	0	0	0	0	0	0	0	0	0	0	0	0	0	0	0
185193	0	0	0	0	0	0	0	0	0	0	0	0	0	0	0	0	0	0	0	0	0	0	0	0	0	0	0	0	0	0	0	0	0	0	0	0	0	0	0	0	0	0	0	0	0	0	0	0	0
New.ReferenceOTU495	0	0	0	0	0	19	0	0	0	0	0	0	0	0	0	0	0	0	0	0	0	0	0	0	0	0	0	0	0	0	0	0	0	0	0	0	0	0	0	0	0	0	0	0	0	0	0	0	0
New.CleanUp.ReferenceOTU29638	0	0	0	0	0	0	0	0	0	0	0	0	0	0	0	0	0	0	0	0	0	0	0	0	0	0	0	0	0	0	0	0	0	0	0	0	0	0	0	0	0	0	0	0	0	0	0	0	0
827523	0	0	0	0	0	0	0	0	0	0	0	0	0	0	0	0	0	0	0	0	0	0	0	0	0	0	0	0	0	0	0	0	0	0	0	0	0	0	0	0	0	0	0	0	0	0	0	0	0
New.CleanUp.ReferenceOTU18049	0	0	0	0	0	0	0	0	0	0	0	0	0	0	0	0	0	0	0	0	0	0	0	0	0	0	0	0	0	0	0	0	0	0	0	0	0	0	0	0	0	0	0	0	0	0	0	0	0
New.CleanUp.ReferenceOTU341746	0	0	0	0	0	0	0	0	0	0	0	0	0	0	0	0	0	0	0	0	0	0	0	0	0	0	0	15	0	0	0	0	0	0	0	0	0	0	0	0	0	0	0	0	0	0	0	0	0
New.CleanUp.ReferenceOTU65895	0	0	0	0	0	13	0	0	0	0	0	0	0	0	0	0	0	0	0	0	0	0	0	0	0	0	0	0	0	0	0	3	0	0	0	0	0	0	0	0	0	0	0	0	0	0	0	0	0
577149	0	0	0	0	0	0	0	0	0	0	0	0	0	0	0	0	0	0	0	0	0	0	0	0	0	0	0	0	0	0	0	0	0	0	0	0	0	0	0	0	0	0	0	0	0	0	0	0	0
703266	0	0	0	0	0	0	0	0	0	0	0	0	0	0	0	0	0	0	0	0	0	0	0	0	0	0	0	0	0	0	0	0	0	0	0	0	0	0	0	0	0	0	0	0	0	0	0	0	0
210067	0	0	0	0	0	0	0	0	0	0	0	0	0	0	0	0	0	0	0	0	0	0	0	0	0	0	0	0	0	0	0	6	0	0	3	0	0	0	0	0	0	0	0	0	0	0	0	3	0
263961	0	0	0	0	0	0	0	0	0	0	0	0	0	0	0	0	0	0	0	0	0	0	0	0	0	0	0	0	0	0	0	0	0	0	0	0	0	0	0	0	0	0	0	0	0	0	0	0	0
726273	0	0	0	0	0	0	0	0	0	0	0	0	0	0	0	0	0	0	0	0	0	0	0	0	0	0	0	0	0	0	0	0	0	0	0	0	0	0	0	0	0	0	0	0	0	0	0	0	0
65692	0	0	0	0	0	0	0	0	0	0	0	0	0	0	0	0	0	0	0	0	0	0	0	0	0	0	0	0	0	0	0	3	0	0	0	0	0	0	0	0	0	0	0	0	0	0	0	0	0
New.CleanUp.ReferenceOTU78711	0	0	0	0	0	0	0	0	0	0	0	0	0	0	0	0	0	0	0	0	0	0	0	0	0	0	0	0	0	0	0	0	0	0	0	0	0	0	0	0	0	0	0	0	0	0	0	0	0
New.ReferenceOTU908	0	0	0	0	0	0	0	0	0	0	0	0	0	0	0	0	0	0	0	0	0	0	0	0	0	0	0	0	0	0	0	0	0	0	0	0	0	0	0	0	0	0	0	0	0	0	0	0	0
New.CleanUp.ReferenceOTU154610	0	0	0	0	0	0	0	0	0	0	0	0	0	0	0	0	0	0	0	0	0	0	0	0	0	0	0	0	0	0	0	0	0	0	0	0	0	0	0	0	0	0	0	0	0	0	0	0	0
New.CleanUp.ReferenceOTU250397	0	0	0	0	0	0	0	0	0	0	0	0	0	0	0	0	0	0	0	0	0	0	0	0	0	0	0	0	0	0	0	0	0	0	0	0	0	0	0	0	0	0	0	0	0	0	0	0	0
New.CleanUp.ReferenceOTU74076	0	0	0	0	0	0	0	0	0	0	0	0	0	0	0	0	0	0	0	0	0	0	0	0	0	0	0	66	0	0	0	0	0	0	0	0	0	0	0	0	0	0	0	0	0	0	0	0	0
New.CleanUp.ReferenceOTU45301	0	0	0	0	0	0	0	0	0	0	0	0	0	0	0	0	0	0	0	0	0	0	0	0	0	0	0	0	0	0	0	0	0	0	0	0	0	0	0	0	0	0	0	0	0	0	0	0	0
New.ReferenceOTU578	0	0	0	0	0	0	0	0	0	0	0	0	0	0	0	0	0	0	0	0	0	0	0	0	0	0	0	0	0	0	0	0	0	0	0	0	0	0	0	0	0	0	0	0	0	0	0	0	0
New.CleanUp.ReferenceOTU82102	0	0	0	0	0	0	0	0	0	0	0	0	0	0	0	0	0	0	0	0	0	0	0	0	0	0	0	0	0	0	0	0	0	0	0	0	0	0	0	0	0	0	0	0	0	0	0	0	0
New.CleanUp.ReferenceOTU107388	0	0	0	0	0	0	0	0	0	0	0	0	0	0	0	0	0	0	0	0	0	0	0	0	0	0	0	0	0	0	0	0	0	0	0	0	0	0	0	0	0	0	0	0	0	0	0	0	0
New.CleanUp.ReferenceOTU742	0	0	0	0	0	0	0	0	0	0	0	0	0	0	0	0	0	0	0	0	0	0	0	0	0	0	0	0	0	0	0	0	0	0	0	0	0	0	0	0	0	0	0	0	0	0	0	0	0
New.CleanUp.ReferenceOTU11574	0	0	0	0	0	0	0	0	0	0	0	0	0	0	0	0	0	0	0	0	0	0	0	0	0	0	0	0	0	0	0	0	0	0	0	0	0	0	0	0	0	0	0	0	0	0	0	0	0
New.CleanUp.ReferenceOTU246765	0	0	0	0	0	42	0	0	0	0	0	0	0	0	0	0	0	0	0	0	0	0	0	0	3	0	0	236	0	0	0	22	0	0	5	0	0	0	0	0	0	0	0	0	0	0	0	6	0
New.CleanUp.ReferenceOTU339476	0	0	0	0	0	0	0	0	0	0	0	0	0	0	0	0	0	0	0	0	0	0	0	0	0	0	0	0	0	0	0	0	0	0	0	0	0	0	0	0	0	0	0	0	0	0	0	0	0
New.CleanUp.ReferenceOTU232888	0	0	0	0	0	0	0	0	0	0	0	0	0	0	0	0	0	0	0	0	0	0	0	0	0	0	0	0	0	0	0	0	7	0	0	0	0	0	0	0	0	0	0	0	0	0	0	0	0
New.CleanUp.ReferenceOTU215869	0	0	0	0	0	0	0	0	0	0	0	0	0	0	0	0	0	0	0	0	0	0	0	0	0	0	0	0	0	0	0	0	0	0	0	0	0	0	0	0	0	0	0	0	0	0	0	0	0
New.CleanUp.ReferenceOTU214458	0	0	0	0	0	0	0	0	0	0	0	0	0	0	0	0	0	0	0	0	0	0	0	0	0	0	0	0	0	0	0	0	0	0	0	0	0	0	0	0	0	0	0	0	0	0	0	0	0
New.CleanUp.ReferenceOTU337625	0	0	0	0	0	0	0	0	0	0	0	0	0	0	0	0	0	0	0	0	0	0	0	0	0	0	0	0	0	0	0	0	0	0	0	0	0	0	0	0	0	0	0	0	0	0	0	0	0
517412	0	0	0	0	0	0	0	0	0	0	0	0	0	0	0	0	0	0	0	0	0	0	0	0	0	0	0	540	0	0	0	5	0	0	0	0	3	0	0	0	0	0	0	0	0	0	0	0	0
254336	0	0	0	0	0	0	0	0	0	0	0	0	0	0	0	0	0	0	0	0	0	0	3	0	0	0	0	3	0	0	0	0	0	0	0	0	0	0	0	0	0	0	0	0	0	0	0	0	0
775409	0	0	0	0	0	0	0	0	0	0	0	0	0	0	0	0	0	0	0	0	0	0	0	0	0	0	0	61	0	0	0	17	0	0	0	0	3	0	0	0	0	0	0	0	0	0	0	3	0
82007	0	0	0	0	0	0	0	0	0	0	0	0	0	0	0	0	0	0	0	0	0	0	0	0	0	0	0	0	0	0	0	0	0	0	0	0	0	0	0	0	0	0	0	0	0	0	0	0	0
4334625	0	0	0	0	0	0	0	0	0	0	0	0	0	0	0	0	0	0	0	0	0	0	0	0	0	0	0	329	0	0	0	18	13	0	0	0	0	0	0	0	0	0	0	0	0	0	0	4	0
206278	0	0	0	0	0	0	0	0	0	0	0	0	0	0	0	0	0	0	0	0	0	0	0	0	0	0	0	0	0	0	0	0	0	0	0	0	0	0	0	0	0	0	0	0	0	0	0	0	0
833957	0	0	0	0	0	0	0	0	0	0	0	0	0	0	0	0	0	0	0	0	0	0	0	0	0	0	0	4	0	0	0	0	0	0	0	0	0	0	0	0	0	0	0	0	0	0	0	0	0
4398746	0	0	0	0	0	0	0	0	0	0	0	0	0	0	0	0	0	0	0	0	0	0	0	0	0	0	0	345	0	0	0	4	0	0	0	0	0	0	0	0	0	0	0	0	0	0	0	5	0
New.CleanUp.ReferenceOTU116892	0	0	0	0	0	0	0	0	0	0	0	0	0	0	0	0	0	0	0	0	0	0	0	0	0	0	0	0	0	0	0	0	0	0	0	0	0	0	0	0	0	0	0	0	0	0	0	0	0
212027	0	0	0	0	0	0	0	0	0	0	0	0	0	0	0	0	0	0	0	0	0	0	0	0	0	0	0	0	0	0	0	0	0	0	0	0	0	0	0	0	0	0	0	0	0	0	0	0	0
New.CleanUp.ReferenceOTU51251	0	0	0	0	0	0	0	0	0	0	0	0	0	0	0	0	0	0	0	0	0	0	0	0	0	0	0	0	0	0	0	0	0	0	0	0	0	0	0	0	0	0	0	0	0	0	0	0	0
New.CleanUp.ReferenceOTU95428	0	0	0	0	0	0	0	0	0	0	0	0	0	0	0	0	0	0	0	0	0	0	0	0	0	0	0	0	0	0	0	0	0	0	0	0	0	0	0	0	0	0	0	0	0	0	0	0	0
New.CleanUp.ReferenceOTU26772	0	0	0	0	0	0	0	0	0	0	0	0	0	0	0	0	0	0	0	0	0	0	0	0	0	0	0	4	0	0	0	0	0	0	0	0	0	0	0	0	0	0	0	0	0	0	0	0	0
112952	0	0	0	0	0	0	0	0	0	0	0	0	0	0	0	0	0	0	0	0	0	0	0	0	0	0	0	0	0	0	0	0	0	0	0	0	0	0	0	0	0	0	0	0	0	0	0	0	0
New.CleanUp.ReferenceOTU217204	0	0	0	0	0	0	0	0	0	0	0	0	0	0	0	0	0	0	0	0	0	0	0	0	0	0	0	0	0	0	0	0	0	0	0	0	0	0	0	0	0	0	0	0	0	0	0	0	0
New.CleanUp.ReferenceOTU85799	0	0	0	0	0	0	0	0	0	0	0	0	0	0	0	0	0	0	0	0	0	0	0	0	0	0	0	0	0	0	0	0	0	0	0	0	0	0	0	0	0	0	0	0	0	0	0	0	0
New.CleanUp.ReferenceOTU224142	0	0	0	0	0	0	0	0	0	0	0	0	0	0	0	0	0	0	0	0	0	0	0	0	0	0	0	8	0	0	0	7	0	0	0	0	0	0	0	0	0	0	0	0	0	0	0	0	0
New.CleanUp.ReferenceOTU273052	0	0	0	0	0	0	0	0	0	0	0	0	0	0	0	0	0	0	0	0	0	0	0	0	0	0	0	0	0	0	0	0	0	0	0	0	0	0	0	0	0	0	0	0	0	0	0	0	0
New.CleanUp.ReferenceOTU109136	0	0	0	0	0	0	0	0	0	0	0	0	0	0	0	0	0	0	0	0	0	0	0	0	0	0	0	0	0	0	0	0	0	0	0	0	0	0	0	0	0	0	0	0	0	0	0	0	0
New.CleanUp.ReferenceOTU359197	0	0	0	0	0	0	0	0	0	0	0	0	0	0	0	0	0	0	0	0	0	0	0	0	0	0	0	199	0	0	0	5	0	0	0	0	0	0	0	0	0	0	0	0	0	0	0	0	0
New.CleanUp.ReferenceOTU67452	0	0	0	0	0	0	0	0	0	0	0	0	0	0	0	0	0	0	0	0	0	0	0	0	0	0	0	0	0	0	0	0	0	0	0	0	0	0	0	0	0	0	0	0	0	0	0	0	0
1119093	0	0	0	0	0	0	0	0	0	0	0	0	0	0	0	0	0	0	0	0	0	0	0	0	0	0	0	0	0	0	0	0	0	0	0	0	0	0	0	0	0	0	0	0	0	0	0	0	0
New.CleanUp.ReferenceOTU179403	0	0	0	0	0	0	0	0	0	0	0	0	0	0	0	0	0	0	0	0	0	0	0	0	0	0	0	0	0	0	0	0	0	0	0	0	0	0	0	0	0	0	0	0	0	0	0	0	0
New.CleanUp.ReferenceOTU187964	0	0	0	0	0	0	0	0	0	0	0	0	0	0	0	0	0	0	0	0	0	0	0	0	0	0	0	27	0	0	0	7	0	0	0	0	0	0	0	0	0	0	0	0	0	0	0	0	0
961922	0	0	0	0	0	0	0	0	0	0	0	0	0	0	0	0	0	0	0	0	0	0	0	0	0	0	0	0	0	0	0	0	0	0	0	0	0	0	0	0	0	0	0	0	0	0	0	0	0
New.CleanUp.ReferenceOTU68117	0	0	0	0	0	0	0	0	0	0	0	0	0	0	0	0	0	0	0	0	0	0	0	0	0	0	0	0	0	0	0	0	0	0	0	0	0	0	0	0	0	0	0	0	0	0	0	0	0
New.CleanUp.ReferenceOTU82958	0	0	0	0	0	0	0	0	0	0	0	0	0	0	0	0	0	0	0	0	0	0	0	0	0	0	0	0	0	0	0	0	0	0	0	0	0	0	0	0	0	0	0	0	0	0	0	0	0
New.CleanUp.ReferenceOTU324914	0	0	0	0	0	0	0	0	0	0	0	0	0	0	0	0	0	0	0	0	0	0	0	0	0	0	0	0	0	0	0	0	0	0	0	0	0	0	0	0	0	0	0	0	0	0	0	0	0
New.CleanUp.ReferenceOTU120410	0	0	0	0	0	0	0	0	0	0	0	0	0	0	0	0	0	0	0	0	0	0	0	0	0	0	0	0	0	0	0	0	63	0	0	0	0	0	0	0	0	0	0	0	0	0	0	0	0
New.ReferenceOTU902	0	0	0	0	0	0	0	0	0	8	0	4	0	0	0	0	0	4	0	0	0	6	5	0	0	11	0	0	0	15	4	0	6	0	19	3	0	0	0	0	6	0	0	0	0	0	0	5	10
New.ReferenceOTU477	0	0	0	0	0	0	0	0	0	0	0	0	0	0	0	0	0	0	0	0	0	0	0	0	0	0	0	0	0	0	0	0	0	0	0	0	0	0	0	0	0	0	0	0	0	0	0	0	0
New.CleanUp.ReferenceOTU148540	0	0	0	0	0	0	0	0	0	0	0	0	0	0	0	0	0	0	0	0	0	0	0	0	0	0	0	0	0	0	0	0	0	0	0	0	0	0	0	0	0	0	0	0	0	0	0	0	0
New.ReferenceOTU1008	0	32	8	0	73	554	0	0	0	187	0	79	76	0	94	0	3	0	0	0	0	0	232	0	0	25	0	43	30	0	0	421	0	3	232	14	282	47	0	3	332	93	0	0	29	0	0	168	48
New.ReferenceOTU323	0	34	0	0	29	212	6	88	1311	547	194	37	37	0	849	370	4	637	0	22	5343	40	255	698	38	82	8	541	12	450	99	639	1195	480	232	25	160	0	37	87	1128	168	483	0	54	428	91	155	108
New.ReferenceOTU220	0	0	0	0	0	0	0	0	0	0	0	0	0	0	0	0	0	0	0	0	0	0	0	0	0	0	0	0	0	0	0	0	0	0	0	0	0	0	0	0	0	0	0	0	0	0	0	0	0
New.ReferenceOTU804	0	0	0	0	0	0	0	0	0	0	0	0	0	0	0	0	0	0	0	0	0	0	0	0	0	0	0	0	0	0	0	0	0	0	0	0	0	0	0	0	0	0	0	0	0	0	0	0	0
1051517	0	0	0	0	0	0	0	0	0	0	0	0	0	0	0	0	0	0	0	0	0	0	0	0	0	0	0	0	0	0	0	0	0	0	0	0	0	0	0	0	0	0	0	0	0	0	0	0	0
New.CleanUp.ReferenceOTU271038	0	0	0	0	0	0	0	0	0	0	0	0	0	0	0	0	0	0	0	0	0	0	0	0	0	0	0	0	0	0	0	0	0	0	0	0	0	0	0	0	7	0	0	0	0	0	0	0	0
New.CleanUp.ReferenceOTU64706	0	0	0	0	0	0	0	0	0	0	0	0	0	0	0	0	0	0	0	0	0	0	0	0	0	0	0	0	0	0	0	0	0	0	0	0	0	0	0	0	0	0	0	0	0	0	0	0	0
New.CleanUp.ReferenceOTU103885	0	0	0	0	0	0	0	0	0	0	0	0	0	0	0	0	0	0	0	0	0	0	0	0	0	0	0	0	0	0	0	0	0	0	0	0	0	0	0	0	21	0	0	0	0	0	0	0	3
New.CleanUp.ReferenceOTU290355	0	0	0	0	0	0	0	0	0	0	0	0	0	0	0	0	0	0	0	0	0	0	0	0	0	0	0	0	0	0	0	0	0	0	0	0	0	0	0	0	0	0	0	0	0	0	0	0	0
593219	0	0	0	0	0	0	0	0	0	0	0	0	0	0	0	0	0	0	0	0	0	0	0	0	5	0	0	0	0	0	0	0	0	0	0	0	0	0	0	0	0	0	0	0	0	0	0	0	0
New.CleanUp.ReferenceOTU46416	0	0	0	0	0	0	0	0	0	0	0	0	0	0	0	0	0	0	0	0	0	0	0	0	0	0	0	0	0	0	0	0	0	0	0	0	0	0	0	0	0	0	0	0	0	0	0	0	0
919491	0	0	0	0	0	0	0	0	0	0	0	0	0	0	0	0	0	0	0	0	0	0	0	0	0	0	0	0	0	0	0	0	0	0	0	0	0	0	0	0	0	0	0	0	0	0	0	0	0
848816	0	0	0	0	0	0	0	0	0	0	0	0	0	0	0	0	0	0	0	0	0	0	0	0	0	0	0	47	0	0	0	17	0	0	0	0	0	0	0	0	0	0	0	0	0	0	0	0	0
New.CleanUp.ReferenceOTU20912	0	0	0	0	0	0	0	0	0	0	0	0	0	0	0	0	0	0	0	0	0	0	0	0	0	0	0	0	0	0	0	0	0	0	0	0	0	0	0	0	0	0	0	0	0	0	0	0	0
New.ReferenceOTU1194	0	0	0	0	0	0	0	0	0	0	0	0	0	0	0	0	0	0	0	0	0	0	0	0	0	0	0	0	0	0	0	0	0	0	0	0	0	0	0	0	0	0	0	0	0	0	0	0	0
695185	0	0	0	0	0	0	0	0	0	0	0	0	0	0	0	0	0	0	0	0	0	0	0	0	0	0	0	0	0	0	0	0	0	0	0	0	0	0	0	0	0	0	0	0	0	0	0	0	0
New.CleanUp.ReferenceOTU106383	0	0	0	0	0	0	0	0	0	0	0	0	0	0	0	0	0	0	0	0	0	0	0	0	0	0	0	0	0	0	0	0	0	0	0	0	0	0	0	0	0	0	0	0	0	0	0	0	0
578257	0	0	0	0	0	0	0	0	0	0	0	0	0	0	0	0	0	0	0	0	0	0	0	0	0	0	0	0	0	0	0	0	0	0	0	0	0	0	0	0	0	0	0	0	0	0	0	0	0
New.CleanUp.ReferenceOTU5163	0	0	0	0	0	0	0	0	0	0	0	0	0	0	0	0	0	0	0	0	0	0	0	0	0	0	0	0	0	0	0	0	0	0	0	0	0	0	0	0	0	0	0	0	0	0	0	0	0
4302793	0	0	0	0	0	0	0	0	0	0	0	0	0	0	0	0	0	0	0	0	0	0	0	0	0	0	0	0	0	0	0	0	0	0	0	0	0	0	0	0	0	0	0	0	0	0	0	0	0
New.CleanUp.ReferenceOTU135288	0	0	0	0	0	0	0	0	0	0	0	0	0	0	0	0	0	0	0	0	0	0	0	0	0	0	0	0	0	0	0	0	0	0	0	0	0	0	0	0	0	0	0	0	0	0	0	0	0
New.ReferenceOTU521	0	0	0	0	0	0	0	0	0	0	0	0	0	0	0	0	0	0	0	0	0	0	0	0	0	0	0	0	0	0	0	0	0	0	0	0	0	0	0	0	0	0	0	0	0	0	0	0	0
New.CleanUp.ReferenceOTU348476	0	0	0	0	0	0	0	0	0	0	0	0	0	0	0	0	0	0	0	0	0	0	0	0	0	0	0	0	0	0	0	0	0	0	0	0	0	0	0	0	0	0	0	0	0	0	0	0	0
155936	0	0	0	0	0	0	0	0	0	0	0	0	0	0	0	0	0	0	0	0	0	0	0	0	0	0	0	0	0	0	0	0	0	0	0	0	0	0	0	0	0	0	0	0	0	0	0	0	0
1084045	0	0	0	0	0	0	0	0	0	0	0	0	0	0	0	0	0	0	0	0	0	0	0	0	0	0	0	0	0	0	0	0	0	0	0	0	0	0	0	0	0	0	0	0	0	0	0	0	0
4455980	0	0	0	0	0	0	0	0	0	0	0	0	0	0	0	0	0	0	0	0	0	0	0	0	0	0	0	0	0	0	0	0	0	0	0	0	0	0	0	0	0	0	0	0	0	0	0	0	0
212584	0	0	0	0	0	0	0	0	0	0	0	0	0	0	0	0	0	0	0	0	0	0	0	0	0	0	0	0	0	0	0	0	0	0	0	0	0	0	0	0	0	0	0	0	0	0	0	0	0
New.CleanUp.ReferenceOTU39641	0	0	0	0	0	0	0	0	0	0	0	0	0	0	0	0	0	0	0	0	0	0	0	0	0	0	0	0	0	0	0	0	0	0	0	0	0	0	0	0	0	0	0	0	0	0	0	0	0
New.CleanUp.ReferenceOTU173628	0	0	0	0	0	0	0	0	0	0	0	0	0	0	0	0	0	0	0	0	0	0	0	0	0	0	0	0	0	0	0	0	0	0	0	0	0	0	0	0	0	0	0	0	0	0	0	0	0
726569	0	0	0	0	0	0	0	0	0	0	0	0	0	0	0	0	0	0	0	0	0	0	0	0	0	0	0	0	0	0	0	0	0	0	0	0	0	0	0	0	0	0	0	0	0	0	0	0	0
173333	0	0	0	0	0	0	0	0	0	0	0	0	0	0	0	0	0	0	0	0	0	0	0	0	0	0	0	0	0	0	0	0	0	0	0	0	0	0	0	0	0	0	0	0	0	0	0	0	0
540269	3	0	0	0	0	0	0	0	0	0	0	0	0	0	0	0	0	0	0	0	0	0	0	0	0	0	0	0	0	0	0	0	0	0	0	0	0	0	0	0	0	0	0	0	0	0	0	0	0
578911	0	0	0	0	0	0	0	0	0	0	0	0	0	0	0	0	0	0	0	0	0	0	0	0	0	0	0	0	0	0	0	0	0	0	0	0	0	0	0	0	0	0	0	0	0	0	0	0	0
69980	0	0	0	0	0	0	0	0	0	0	0	0	0	18	0	0	0	0	0	0	0	0	0	0	0	0	0	0	0	0	0	0	0	0	0	0	0	0	0	0	0	0	0	0	0	0	0	0	0
445962	0	0	0	0	0	0	0	0	0	0	0	0	0	18	0	0	0	0	0	0	0	0	0	0	0	0	0	0	0	0	0	0	0	0	0	0	0	0	0	0	0	0	0	0	0	0	0	0	0
1065974	0	0	63	0	0	0	0	9	0	0	0	0	0	0	0	0	0	3	0	18	0	0	0	17	19	0	0	0	0	0	0	0	0	0	0	0	0	0	0	0	0	0	0	0	0	0	0	0	0
716006	0	0	4	0	0	0	0	0	0	0	0	0	0	0	0	0	0	0	0	0	0	0	0	0	0	0	0	0	0	0	0	0	0	0	0	0	0	0	0	0	0	0	0	0	0	0	0	0	0
335256	0	0	0	0	0	0	0	0	0	0	3	0	0	0	0	0	0	0	0	0	0	0	0	0	0	0	0	0	0	0	0	0	0	0	0	0	0	0	0	0	0	0	0	0	0	0	10	0	0
1085832	0	0	0	0	0	0	0	0	0	0	0	0	0	0	0	0	0	0	0	0	0	0	0	0	0	0	0	0	0	0	0	0	0	0	0	0	0	0	0	0	0	0	0	0	0	0	0	3	0
368490	12	4	0	0	3	98	42	6	515	53	16	11	0	0	0	231	0	160	0	7	352	57	41	153	54	11	18	165	24	327	108	241	2072	151	32	8	18	8	10	0	23	16	435	0	13	0	86	49	12
New.ReferenceOTU566	12	4	0	0	5	37	21	0	313	22	9	0	0	0	0	122	0	96	0	0	260	29	20	132	22	0	12	116	9	178	70	129	1014	80	8	7	7	8	7	6	12	6	165	0	5	0	42	23	10
806030	9	0	0	0	5	0	12	11	67	28	11	6	3	0	0	30	0	48	0	0	0	33	19	48	7	14	8	150	14	182	31	55	0	10	7	6	4	3	8	0	0	0	0	6	0	0	35	3	0
New.CleanUp.ReferenceOTU272744	0	0	0	0	0	0	0	0	0	0	0	0	0	0	0	6	0	10	0	0	0	4	0	0	0	0	0	0	0	3	0	0	0	0	0	0	0	0	0	0	0	0	0	0	0	0	0	0	0
New.CleanUp.ReferenceOTU87935	0	0	0	0	0	0	0	0	0	0	0	0	0	0	0	0	0	0	0	0	0	0	0	0	0	0	0	0	0	8	0	0	0	0	0	0	0	0	0	0	0	0	0	0	0	0	0	0	0
350697	0	0	0	0	0	0	0	0	10	0	0	0	0	3	0	10	0	5	0	0	10	0	3	0	4	0	0	18	0	5	3	14	7	0	0	0	0	0	0	0	0	0	6	0	0	53	0	0	0
534957	0	0	0	0	0	6	0	0	4	0	0	0	0	0	0	4	0	0	0	0	62	0	0	0	0	0	0	23	0	0	0	17	3	0	0	0	0	0	0	0	0	0	6	0	0	75	0	0	4
182891	0	0	0	0	0	0	0	0	5	0	0	0	0	0	0	0	0	0	0	0	9	0	0	0	0	0	0	9	0	5	0	11	3	0	0	0	0	0	0	0	0	0	0	0	0	19	0	0	0
New.ReferenceOTU824	0	5	0	0	8	0	0	0	10	3	10	7	18	3	0	0	0	0	4	0	0	17	5	13	0	0	3	11	5	6	0	0	0	19	17	0	27	53	0	0	0	0	0	0	0	0	0	0	0
4355971	0	0	0	0	0	4	0	0	0	0	0	0	0	0	0	3	0	0	0	0	8	3	0	0	0	0	0	5	0	0	0	0	3	0	0	0	0	0	0	0	0	0	3	0	0	10	0	0	0
342268	0	0	0	0	0	3	3	0	0	0	0	0	0	0	0	0	0	0	0	0	0	0	0	0	5	0	0	0	0	0	0	0	0	0	0	0	0	0	0	0	0	0	0	0	0	0	0	0	0
New.CleanUp.ReferenceOTU240336	0	0	0	0	0	0	0	0	0	0	0	0	0	0	0	4	0	4	0	0	0	0	0	0	0	0	0	0	0	5	0	0	0	0	0	0	0	0	0	0	0	0	0	0	0	0	0	0	0
New.ReferenceOTU744	0	98	0	0	47	0	6	8	217	118	129	60	113	85	0	31	3	13	73	4	7	183	64	232	15	32	28	208	39	59	8	3	5	326	190	43	279	450	8	48	10	0	0	0	8	0	15	5	3
New.CleanUp.ReferenceOTU60073	0	0	0	0	0	0	0	0	0	0	0	0	0	0	0	0	0	0	0	0	0	0	0	0	0	0	0	0	0	0	0	0	0	0	0	0	0	0	0	0	0	0	0	0	0	0	0	0	0
New.CleanUp.ReferenceOTU31665	0	0	0	0	0	0	0	0	17	7	0	0	0	0	0	0	0	0	0	0	0	0	0	0	0	0	0	0	0	0	0	0	0	0	0	0	0	0	0	0	0	0	0	0	0	0	0	0	0
New.CleanUp.ReferenceOTU132785	0	0	5	0	0	0	0	0	0	0	0	0	0	0	0	0	0	0	0	0	0	0	0	0	0	0	0	0	0	0	0	197	0	0	0	0	0	17	0	0	0	0	0	0	6	0	0	0	3
179861	0	14	9	0	4	0	0	0	0	5	0	0	3	0	177	0	0	0	0	0	0	19	0	0	0	0	0	0	0	4	0	21	0	10	10	0	0	0	0	36	0	0	0	0	4	0	9	0	0
4372528	0	0	0	0	0	0	0	0	0	0	0	0	0	0	0	0	0	0	0	0	0	0	0	0	0	0	0	8	0	0	3	11	0	0	0	0	0	0	0	0	0	0	9	0	0	4	0	0	0
827195	0	0	0	0	0	0	0	0	0	0	0	0	0	0	0	0	0	0	0	0	0	0	0	0	0	0	0	0	0	0	0	0	0	0	0	0	0	0	0	0	0	0	0	0	0	0	0	0	61
New.CleanUp.ReferenceOTU9505	0	0	0	0	0	0	0	98	0	0	0	0	0	0	0	0	0	0	0	55	0	0	0	0	0	0	0	0	0	0	0	0	0	0	0	0	0	0	0	0	0	0	0	0	0	0	0	0	0
322839	0	0	0	0	0	0	0	0	0	0	0	0	0	0	0	0	0	0	0	0	0	0	0	0	0	0	0	0	0	0	0	0	0	0	0	0	0	0	0	0	0	0	0	0	0	0	0	0	41
New.ReferenceOTU212	0	0	0	0	0	0	0	3	0	0	0	0	0	0	0	0	0	0	0	7	0	0	0	0	28	0	0	0	0	0	0	0	0	4	0	0	0	0	0	0	0	0	0	0	18	0	0	0	0
New.CleanUp.ReferenceOTU140324	0	0	0	0	0	0	0	0	0	0	0	0	0	0	0	0	0	0	0	0	0	0	0	0	0	0	0	0	0	0	0	0	0	0	0	0	0	0	0	0	0	0	0	0	0	0	0	0	0
New.CleanUp.ReferenceOTU318946	0	0	0	0	0	0	0	0	0	0	0	0	0	0	0	0	0	0	0	0	0	0	0	0	0	0	0	0	0	0	0	0	0	0	0	0	0	0	0	0	0	0	0	0	0	0	0	0	0
New.CleanUp.ReferenceOTU352196	0	0	0	0	0	0	0	0	0	0	0	0	0	0	0	0	0	0	0	0	0	0	0	0	0	0	0	0	0	0	0	0	0	0	0	0	0	0	0	0	0	0	0	0	0	0	0	0	0
591376	0	0	0	0	0	0	0	0	0	0	0	0	0	0	0	0	0	0	0	0	0	0	0	0	0	0	0	0	0	0	0	0	0	0	0	0	0	0	0	0	0	0	0	0	0	0	0	0	0
New.CleanUp.ReferenceOTU174665	0	0	0	0	0	0	0	0	0	0	0	0	0	0	0	0	0	0	0	0	0	0	0	0	0	0	0	0	0	0	0	0	0	0	0	0	0	0	0	0	0	0	0	0	0	0	0	0	0
547714	9	8	0	0	8	167	12	4	354	34	16	28	5	10	55	198	3	66	13	0	255	34	54	15	29	8	13	95	57	155	101	802	258	33	28	40	18	13	3	31	11	7	186	3	17	619	6	39	12
New.ReferenceOTU117	0	0	0	0	0	5	0	3	0	0	3	0	0	0	0	0	3	4	0	0	8	0	4	0	0	0	0	9	0	4	0	4	7	0	0	0	0	0	0	3	0	0	22	0	0	8	0	10	0
540086	0	0	0	0	0	4	0	0	7	0	0	0	0	5	19	4	0	4	0	0	17	4	5	0	9	0	0	10	0	4	7	29	33	3	0	4	3	0	0	0	0	3	4	0	0	33	0	0	0
341078	0	0	0	0	0	0	0	0	0	0	0	0	0	0	0	0	0	0	0	0	0	0	0	0	0	0	0	0	0	0	0	0	0	0	0	0	0	0	0	0	0	0	0	0	0	0	0	0	0
New.CleanUp.ReferenceOTU36624	0	0	0	0	0	0	0	0	0	0	0	0	0	0	0	0	0	0	0	0	0	0	0	0	0	0	0	0	0	0	0	0	0	0	0	0	0	0	0	0	0	0	0	0	0	0	0	0	0
555945	170	77	51	0	78	361	450	294	3351	246	526	271	42	676	96	1452	81	640	69	87	4035	882	381	639	1208	76	328	2255	221	2099	1218	2451	1062	452	142	241	73	131	95	246	32	97	966	519	219	6166	199	414	137
843459	92	312	32	0	150	1318	207	232	782	217	335	209	82	619	334	808	74	276	0	82	1675	437	597	564	809	662	218	3122	336	873	638	1397	778	570	271	336	199	174	86	188	32	139	8	206	113	1155	164	170	138
582630	12	175	17	0	141	590	42	46	402	180	127	402	150	263	233	332	28	361	0	24	927	137	208	0	133	136	62	310	182	316	122	349	1332	234	157	161	199	425	37	123	46	16	528	4	34	232	150	53	11
582691	3	167	26	0	27	128	3	14	3	10	9	3	35	346	10762	5	0	3	0	14	3	136	15	0	83	26	18	14	7	5	59	42	17	9	1631	34	40	75	0	8	9	10	26	8	14	4	10	4	24
New.ReferenceOTU377	12	25	16	0	21	136	6	29	196	61	134	25	26	0	555	151	3	53	0	8	257	80	80	53	72	34	49	322	82	142	30	244	372	32	117	41	19	29	16	24	32	64	1095	56	32	150	20	119	62
New.ReferenceOTU194	0	9	5	0	28	38	24	11	0	22	7	11	7	99	658	0	0	0	0	5	99	14	3	14	16	31	15	0	10	10	19	228	14	4	137	0	5	8	6	0	5	5	0	0	3	0	0	4	4
330714	0	15	0	0	10	40	7	0	76	13	20	65	14	24	14	34	0	64	0	0	70	15	31	3	23	12	13	26	20	36	19	35	107	25	24	14	23	37	0	6	3	4	43	0	0	9	23	8	0
344394	9	4	3	0	4	15	23	13	136	12	15	21	5	17	19	72	0	31	9	5	176	45	19	19	62	7	21	262	10	77	63	183	86	20	15	28	11	6	0	11	4	6	50	18	12	676	8	26	11
520369	11	0	0	0	0	0	3	0	0	0	0	0	0	0	28	0	0	0	0	0	0	0	0	0	0	0	0	0	0	0	0	0	0	6	0	0	0	0	0	0	0	0	0	0	0	0	0	0	0
712047	0	3	5	0	0	78	0	0	0	0	0	0	0	9	218	0	0	0	0	0	3	64	0	0	27	18	0	0	0	0	0	0	0	0	28	4	0	5	0	0	0	0	0	0	0	0	0	0	0
351976	6	0	6	0	0	15	8	11	57	7	5	9	0	12	7	30	4	19	0	0	62	17	14	5	21	6	9	82	5	34	31	59	40	9	4	14	3	0	0	6	0	3	45	3	0	160	5	9	3
440904	0	0	16	0	0	3	3	0	0	0	0	0	0	3	0	0	4	0	0	0	0	10	0	0	25	7	0	0	0	0	0	0	0	0	0	0	0	4	6	0	0	0	0	560	0	0	0	0	0
606927	0	0	0	0	4	5	0	4	11	0	0	3	0	0	3	20	0	7	0	0	14	5	0	0	0	0	7	154	4	15	6	74	18	6	6	4	4	0	0	0	0	0	0	0	3	415	0	12	8
337379	0	0	0	0	0	0	0	0	0	0	0	0	0	0	0	0	0	0	0	0	0	0	0	0	0	3	0	3	0	0	0	0	0	0	0	0	0	0	0	0	0	0	0	0	0	4	0	0	0
316228	0	0	0	0	0	0	7	5	0	0	0	0	0	72	0	3	0	0	0	0	0	7	0	9	12	0	4	0	0	8	14	5	0	7	0	0	0	0	0	0	0	0	0	16	0	0	0	0	0
290241	0	0	0	0	0	12	0	3	0	0	6	12	0	0	12	7	0	12	0	0	58	3	15	0	10	4	0	4	0	10	0	11	53	8	4	0	7	3	0	0	0	0	66	0	0	0	6	5	0
295411	0	5	0	0	0	0	28	5	0	0	0	0	0	81	0	0	0	3	0	0	0	11	4	8	11	0	5	0	0	4	13	0	5	0	4	0	0	0	0	0	0	0	0	4	0	0	0	0	0
2942332	3	0	0	0	0	0	5	0	28	0	7	0	0	3	7	17	0	0	0	0	25	9	0	4	11	0	4	55	4	15	10	47	19	5	0	6	0	3	0	7	0	0	8	0	0	133	3	9	5
187466	0	0	0	0	0	0	0	0	8	0	6	3	0	10	0	7	0	4	0	0	18	9	3	3	5	0	3	28	0	6	16	29	11	4	3	0	0	0	0	0	0	0	10	0	0	68	0	4	0
338222	0	0	0	0	3	9	0	0	5	0	13	9	0	4	6	6	0	5	0	0	47	4	7	11	5	0	4	18	4	12	0	8	11	12	11	0	4	4	0	0	3	4	7	0	0	8	5	0	0
2270605	0	0	0	0	0	5	9	7	27	0	6	6	0	12	4	13	0	5	3	0	30	5	5	4	11	0	3	35	0	18	6	44	14	5	0	9	0	0	0	0	0	0	18	0	5	102	0	6	3
328573	0	0	0	0	0	0	5	7	17	0	0	3	3	4	0	10	0	0	0	0	22	4	6	3	5	0	8	25	4	10	6	17	6	0	0	3	0	0	4	0	0	3	13	4	0	44	0	4	6
297143	3	0	0	0	0	3	0	0	14	0	0	4	0	4	0	5	0	0	0	0	19	4	4	5	0	0	4	31	0	7	11	25	11	3	0	0	0	0	0	0	0	0	7	3	0	48	0	6	0
780650	0	3	0	0	0	21	0	6	7	4	0	10	0	5	0	8	3	3	0	0	9	0	7	9	12	9	3	46	0	11	6	25	9	6	0	6	0	0	0	0	0	0	10	5	3	15	0	0	0
198209	0	0	0	0	0	0	4	0	15	3	0	0	0	0	5	12	0	0	0	0	38	10	4	3	8	0	0	31	0	22	4	22	11	0	0	3	4	0	0	3	0	0	9	6	0	62	3	5	0
4343940	0	0	0	0	0	0	0	0	23	0	0	4	0	4	0	6	0	5	0	0	28	6	0	3	15	0	3	38	4	16	8	22	12	0	3	0	0	3	0	4	0	0	11	5	0	79	0	0	0
261590	5	0	0	0	0	0	0	0	21	0	3	3	0	4	0	7	0	6	0	0	30	8	3	4	11	0	4	17	0	11	5	15	7	6	0	6	0	0	0	0	0	0	6	5	0	10	4	0	0
545038	0	0	0	0	0	0	0	5	11	0	3	0	0	9	0	8	0	0	0	0	42	4	0	0	7	0	0	23	0	11	5	24	7	0	0	0	0	0	0	0	0	0	7	0	0	73	0	4	0
New.CleanUp.ReferenceOTU356631	0	0	0	0	0	8	0	0	6	3	4	0	0	0	16	4	0	3	0	0	11	0	8	3	6	0	0	17	6	9	0	16	24	0	3	3	0	0	0	0	4	3	72	0	8	16	0	4	0
New.CleanUp.ReferenceOTU354637	0	0	0	0	0	3	0	0	7	0	0	4	3	0	8	0	0	6	0	0	23	0	5	0	0	0	0	0	0	0	0	4	20	5	3	0	0	0	0	0	3	0	34	0	0	0	0	0	0
331881	0	0	0	0	0	0	5	0	5	0	0	6	0	0	0	3	0	9	0	0	11	7	0	0	5	0	4	12	0	8	4	13	5	3	0	0	3	0	0	4	0	4	3	0	0	27	0	5	0
337048	0	0	0	0	0	0	0	0	0	0	0	0	0	0	7	0	0	0	0	0	0	0	0	0	0	0	0	0	0	0	0	0	0	0	0	0	0	0	0	0	0	0	0	0	0	0	0	0	0
3972073	0	0	0	0	0	0	0	0	6	36	0	4	7	19	159	0	0	0	0	4	0	0	0	0	19	7	0	10	4	0	0	0	0	10	27	3	5	0	0	15	0	0	0	0	0	0	0	0	0
1104963	0	5	0	0	0	4	5	0	0	0	3	0	0	9	151	0	0	0	0	0	6	3	0	0	0	0	0	7	0	4	0	6	3	0	32	3	3	0	0	0	0	0	23	3	0	3	0	0	0
818777	0	0	0	0	0	0	0	0	0	0	0	0	0	0	5	0	0	0	0	0	0	0	0	0	0	0	0	0	0	0	0	0	19	0	0	0	0	0	0	0	0	0	0	0	0	0	0	0	0
276478	0	0	0	0	0	0	0	0	10	0	0	0	0	0	0	5	0	0	0	0	8	0	0	0	0	0	0	9	3	5	4	10	10	0	0	3	0	0	0	0	0	0	0	0	0	33	0	0	0
New.CleanUp.ReferenceOTU101083	0	0	0	0	0	0	0	0	0	0	0	0	0	0	0	0	0	0	0	0	0	0	0	0	23	0	0	0	0	0	0	0	0	0	0	0	0	0	0	0	0	0	0	0	0	0	0	0	0
359750	0	0	0	0	0	0	0	0	18	0	3	0	0	0	45	4	0	0	0	0	11	0	0	17	0	0	0	31	0	4	0	6	18	0	3	0	0	0	0	8	0	0	8	0	0	3	0	0	0
196753	0	0	0	0	0	6	0	0	0	3	0	0	0	5	0	0	0	0	0	0	6	0	3	0	5	4	3	4	0	3	5	0	0	0	0	0	3	0	0	0	0	0	0	0	0	3	0	0	0
345448	0	0	0	0	0	5	0	0	0	0	0	0	0	4	31	0	0	0	0	0	4	3	0	0	0	0	0	0	0	0	0	0	8	0	4	0	0	0	0	0	0	0	0	0	0	0	0	0	0
347714	0	0	0	0	0	0	0	0	4	0	0	4	0	0	0	3	0	3	0	0	8	4	0	0	0	0	0	4	0	5	0	10	0	0	0	0	0	0	0	0	0	0	7	0	0	22	0	0	0
272964	0	0	0	0	0	0	0	0	9	0	3	0	0	3	0	0	0	0	0	0	8	0	3	0	6	0	0	16	0	3	0	11	3	0	0	0	0	0	0	0	0	0	0	0	0	23	0	0	0
New.CleanUp.ReferenceOTU261698	0	0	0	0	0	0	0	0	0	0	0	0	0	0	0	0	0	0	0	0	0	52	0	0	72	0	0	0	0	0	6	0	0	0	0	0	0	0	0	0	0	0	0	8	0	0	7	0	0
305288	0	0	0	0	0	8	0	0	0	0	4	3	0	0	0	9	0	0	0	0	0	4	4	0	3	0	8	0	4	9	0	0	0	0	0	0	0	4	3	0	0	0	0	0	0	0	0	0	0
166896	0	0	0	0	0	4	0	0	0	0	0	0	0	0	0	0	0	0	0	0	5	0	0	4	6	0	0	11	0	0	0	0	0	0	0	0	0	0	0	0	0	0	0	0	0	0	0	0	0
New.ReferenceOTU176	0	0	0	0	0	0	0	0	0	0	0	0	0	0	0	5	0	3	0	0	3	0	3	0	3	0	0	3	0	0	0	3	7	6	6	0	0	3	0	0	0	0	4	0	0	0	0	0	0
514988	0	0	0	0	0	0	0	0	6	0	0	0	0	0	0	4	0	0	0	0	6	5	3	0	0	0	0	6	0	3	3	8	4	0	0	5	0	0	0	0	0	0	0	0	0	14	0	0	0
4295873	0	0	0	0	0	0	0	0	0	0	0	0	0	3	137	0	0	0	0	0	0	0	0	0	0	0	0	0	0	0	0	0	0	0	29	0	0	0	0	0	0	0	0	0	0	0	0	0	0
191218	0	0	0	0	0	6	0	0	0	0	0	0	0	0	0	0	0	0	0	0	6	0	0	0	0	0	0	13	0	0	4	9	5	0	0	0	0	0	0	0	0	0	0	0	0	0	0	0	0
1758401	0	0	0	0	0	0	0	0	0	0	0	0	0	3	0	0	0	0	0	0	7	0	0	0	0	0	0	46	0	0	0	3	0	0	0	0	0	0	0	0	0	0	0	0	0	14	0	0	0
1024529	0	0	0	0	0	0	0	0	0	0	0	0	0	4	0	4	0	0	0	0	7	0	0	0	0	0	0	7	3	0	4	4	4	0	0	0	0	0	0	0	0	0	0	0	0	3	0	0	0
292091	0	0	0	0	0	9	0	0	0	0	0	0	0	0	0	0	0	0	0	0	8	0	3	0	0	4	0	5	3	0	0	7	0	0	0	0	0	0	0	0	0	0	0	0	0	5	0	0	0
New.CleanUp.ReferenceOTU218284	0	0	0	0	0	7	0	0	0	0	0	0	0	0	0	5	0	0	0	0	3	0	0	0	0	0	0	6	0	4	0	3	11	0	0	0	0	0	0	0	0	0	16	0	0	0	0	0	0
New.CleanUp.ReferenceOTU42745	0	0	0	0	0	0	0	0	3	0	0	0	0	0	0	0	0	0	0	0	9	0	0	3	0	0	0	0	0	4	3	5	0	0	0	0	0	0	0	0	0	0	0	0	0	36	0	0	0
530061	0	0	0	0	0	0	0	0	0	0	0	0	0	0	99	0	0	0	0	0	0	0	0	0	0	0	0	0	0	0	0	0	0	0	3	0	0	0	0	0	0	0	0	0	0	0	0	0	0
138056	0	0	0	0	0	0	0	0	0	0	0	0	0	0	0	0	0	0	0	0	0	0	0	0	0	0	0	0	0	0	0	0	0	0	0	0	0	0	0	0	0	0	0	0	0	0	0	0	0
4344883	0	0	0	0	0	0	0	0	0	0	0	0	0	0	15	0	0	0	0	0	0	9	0	0	0	0	0	0	0	0	0	0	0	0	10	0	0	0	0	0	0	0	0	0	0	0	0	0	0
1625448	0	0	0	0	0	4	0	3	0	0	4	0	0	0	0	19	0	9	0	0	0	0	0	0	0	0	0	0	0	8	3	0	0	8	0	0	0	0	3	0	0	0	0	0	0	0	0	0	0
182643	0	0	0	0	0	6	0	0	3	0	0	0	0	0	0	0	0	0	0	0	16	0	0	0	0	3	0	7	0	0	0	0	4	0	0	0	0	0	0	0	0	0	0	0	0	0	0	0	0
4333784	0	0	0	0	0	0	0	0	4	0	0	0	0	3	0	0	0	4	0	0	3	0	0	0	0	0	0	0	0	0	0	0	5	0	0	3	0	4	0	0	0	0	4	0	0	3	0	0	0
386313	0	0	0	0	0	0	0	0	0	0	0	0	0	0	0	0	0	0	0	0	0	4	0	0	0	0	0	0	0	0	0	0	0	0	0	0	0	0	0	0	0	0	0	30	0	0	0	0	0
4454432	0	0	0	0	0	3	0	0	0	0	0	0	0	0	0	0	0	0	0	0	0	0	0	0	0	0	0	12	0	0	0	0	0	3	0	0	0	0	0	0	0	0	0	0	0	4	0	0	0
4289859	0	0	0	0	0	0	0	0	0	0	0	0	0	0	3	0	0	0	0	0	0	0	0	0	0	0	0	3	0	0	0	0	0	0	0	0	0	0	0	0	0	0	0	0	0	0	0	0	0
3540765	0	0	0	0	0	0	0	0	0	0	0	0	0	0	15	0	0	0	0	0	0	3	0	0	0	0	0	0	0	0	0	0	0	0	3	0	0	0	0	0	0	0	0	0	0	0	0	0	0
3571896	0	0	0	0	0	0	0	3	0	0	0	0	0	0	9	0	0	0	0	0	0	0	0	0	0	0	0	0	0	0	0	0	0	0	17	0	0	0	0	0	0	0	0	0	0	0	0	0	0
New.CleanUp.ReferenceOTU74759	0	0	0	0	0	0	0	0	0	0	0	0	0	13	0	0	0	0	0	0	0	0	0	0	0	0	0	0	0	0	0	0	0	0	0	0	0	0	0	0	0	0	0	0	0	0	0	0	0
337083	0	0	0	0	0	0	0	0	0	0	0	0	0	0	0	0	0	0	0	0	0	0	0	0	0	0	0	9	0	0	0	3	0	0	0	0	0	0	0	0	0	0	0	0	0	17	0	0	0
2320623	0	0	0	0	0	0	0	0	0	0	0	0	0	0	0	0	0	4	0	0	0	0	0	0	0	0	0	4	0	0	0	5	0	0	0	0	0	0	0	0	0	0	0	0	0	13	0	0	0
199268	0	0	0	0	0	0	0	0	0	0	0	0	0	0	0	0	0	0	0	0	4	0	0	0	3	0	0	4	0	0	0	5	0	0	0	0	0	0	0	0	0	0	0	0	0	7	0	0	0
304779	0	0	0	0	0	3	0	0	0	0	0	0	0	0	0	0	0	0	0	0	0	0	0	0	0	0	0	3	0	0	0	0	0	0	0	0	0	0	0	0	0	0	0	0	0	0	0	0	0
331199	0	0	0	0	0	4	0	0	0	0	0	0	0	0	4	0	0	0	0	0	0	0	0	0	0	0	0	8	0	0	4	0	0	0	0	0	0	0	0	0	0	0	0	0	0	0	0	0	0
New.CleanUp.ReferenceOTU40655	0	0	0	0	0	0	3	4	0	0	5	0	0	0	0	0	0	0	0	0	0	5	0	0	0	0	6	0	3	9	0	0	0	0	0	0	0	0	0	0	0	0	0	0	0	0	0	0	0
179512	0	0	0	0	0	0	0	0	4	0	0	0	0	0	0	4	0	0	0	0	5	0	0	0	0	0	0	4	0	5	0	0	0	0	0	0	0	0	0	0	0	0	0	0	0	0	0	0	0
New.CleanUp.ReferenceOTU64963	0	0	0	0	0	0	0	0	3	0	0	0	0	0	0	3	0	0	0	0	0	0	0	8	0	0	0	0	0	0	0	0	0	0	0	0	0	0	0	16	0	0	0	0	0	0	0	0	0
New.CleanUp.ReferenceOTU147536	0	0	4	0	0	0	0	0	0	0	0	0	0	0	0	0	0	0	0	0	0	7	0	0	0	3	0	0	0	0	0	0	0	0	0	0	0	0	0	0	0	0	0	0	0	0	0	0	0
316378	0	0	0	0	0	6	0	0	8	0	0	0	0	0	0	0	0	0	0	0	3	0	0	0	0	0	0	3	0	0	0	3	0	0	0	0	0	0	0	0	0	0	0	0	0	13	0	0	0
325419	0	0	0	0	0	0	0	0	0	0	0	0	0	0	0	0	0	0	0	0	0	0	0	0	0	0	0	6	4	0	0	3	3	0	0	0	0	0	0	0	0	0	0	0	0	6	0	0	0
New.CleanUp.ReferenceOTU183287	0	0	0	0	0	0	3	0	0	0	0	0	0	0	0	0	0	0	0	0	0	0	0	0	0	0	0	0	0	0	0	0	0	0	0	0	0	0	0	0	0	0	0	0	0	0	0	0	0
268074	0	0	0	0	0	0	0	0	0	0	0	0	0	0	0	0	0	0	0	0	0	0	0	0	0	0	0	0	0	3	0	0	0	0	0	0	0	0	0	0	0	0	0	0	0	4	0	0	0
171184	0	0	0	0	0	0	0	0	0	0	0	0	0	0	0	0	0	0	0	0	0	0	3	0	0	3	0	3	0	0	0	0	0	0	0	0	0	0	0	0	0	0	0	0	0	0	0	0	0
320087	0	0	0	0	0	0	0	0	0	0	0	0	0	0	0	4	0	0	0	0	0	0	0	0	0	0	0	0	0	0	0	3	0	0	0	0	0	0	0	0	0	0	0	0	0	0	0	0	0
New.CleanUp.ReferenceOTU248477	0	0	0	0	0	0	0	0	0	0	0	0	0	3	0	0	0	0	0	0	0	0	0	0	0	0	0	0	0	3	0	0	0	0	0	0	0	0	0	0	0	0	0	0	0	0	0	0	0
New.ReferenceOTU963	0	0	0	0	0	0	0	0	3	0	0	0	0	0	0	0	0	0	0	0	0	0	0	3	0	0	0	3	0	0	0	0	0	3	0	0	0	0	0	0	0	0	0	0	0	0	0	0	0
811589	0	0	0	0	0	0	0	0	0	0	0	0	0	3	0	0	0	0	0	0	0	0	0	0	0	0	0	0	0	0	7	0	0	0	0	0	0	0	0	0	0	0	0	0	0	0	0	0	0
299137	0	0	0	0	0	0	0	0	0	0	0	0	0	0	0	0	0	0	0	0	0	0	0	0	0	0	0	0	0	0	0	0	0	0	0	0	0	0	0	0	0	0	0	0	0	0	0	0	0
2190102	0	0	0	0	0	0	0	0	0	0	0	0	0	5	0	0	0	0	0	0	0	0	0	0	0	0	0	0	0	0	0	0	0	0	0	0	0	0	0	0	0	0	0	7	0	0	0	0	0
New.CleanUp.ReferenceOTU67620	0	0	0	0	0	0	0	0	0	0	0	0	0	0	0	0	0	0	0	0	0	0	0	0	0	0	0	0	0	0	0	0	0	0	0	0	0	0	0	0	0	0	0	0	0	0	0	0	0
322840	0	0	0	0	0	0	0	0	5	0	0	0	0	0	0	0	0	0	0	0	3	0	0	0	0	0	0	4	0	4	3	0	0	0	0	0	0	0	0	0	0	0	0	0	0	5	0	0	0
New.CleanUp.ReferenceOTU22116	0	0	0	0	0	0	0	0	0	0	0	0	0	0	0	0	0	0	0	0	0	0	0	0	0	0	0	0	0	0	0	0	0	0	4	0	0	3	0	0	0	0	0	0	0	0	0	0	0
322367	0	0	0	0	0	0	0	0	0	0	0	0	0	0	0	0	0	0	0	0	0	0	0	0	10	0	0	0	0	4	9	0	0	0	0	0	0	0	0	0	0	0	0	0	0	0	0	0	0
1115481	0	0	0	0	0	0	0	0	0	0	0	0	0	0	20	0	0	0	0	0	0	0	0	0	0	0	0	0	0	0	0	0	0	0	0	0	0	0	0	0	0	0	0	0	0	0	0	0	0
4350701	0	0	0	0	0	0	0	0	3	0	0	0	0	0	0	0	0	0	0	0	0	0	0	0	0	0	0	3	0	3	0	3	0	0	0	0	0	0	0	0	0	0	0	0	0	0	0	0	0
New.CleanUp.ReferenceOTU16113	0	0	0	0	0	0	0	0	0	0	0	0	0	0	0	0	0	0	0	0	0	0	0	0	0	0	0	0	0	0	0	0	0	0	0	0	0	0	0	0	0	0	0	0	0	0	0	0	0
334485	0	0	0	0	0	0	0	0	0	0	0	0	0	0	0	0	0	0	0	0	0	0	0	0	0	0	0	4	0	0	0	0	0	0	0	0	0	0	0	0	0	0	0	0	0	0	0	0	0
New.CleanUp.ReferenceOTU10563	0	0	0	0	0	0	0	0	0	0	0	0	0	0	0	0	0	0	0	0	0	0	0	0	0	0	0	0	0	0	0	0	0	0	0	0	0	0	0	0	0	0	0	0	0	0	0	0	0
290211	0	0	0	0	0	0	0	0	0	0	0	0	0	0	0	0	0	0	0	0	0	0	0	0	0	0	0	0	0	0	0	3	0	0	0	0	0	0	0	0	0	0	0	0	0	0	0	0	0
New.CleanUp.ReferenceOTU6391	0	0	0	0	0	0	0	0	3	0	0	0	0	0	0	0	0	0	0	0	0	0	0	0	0	0	0	0	0	0	0	0	0	0	0	0	0	0	0	0	0	0	5	0	0	0	0	0	0
New.CleanUp.ReferenceOTU244952	0	0	0	0	0	0	0	0	0	0	0	0	0	0	3	0	0	0	0	0	0	0	0	0	0	0	0	0	0	0	0	0	4	0	0	0	0	0	0	0	0	0	4	0	0	0	0	0	0
New.CleanUp.ReferenceOTU208639	0	0	0	0	0	0	0	0	0	0	0	0	0	0	0	0	0	0	0	0	0	0	0	0	0	0	0	0	0	0	3	3	0	0	0	0	0	0	0	0	0	0	0	0	0	4	0	0	0
174960	0	0	0	0	0	0	0	0	0	0	0	0	0	0	0	0	0	0	0	0	0	0	0	0	0	0	0	0	0	0	0	0	0	0	0	0	0	0	0	0	0	0	0	0	0	0	0	0	0
New.CleanUp.ReferenceOTU37653	0	0	0	0	0	0	0	0	0	0	0	0	0	0	0	0	0	0	0	0	0	0	0	0	0	0	0	0	0	0	0	0	0	0	0	0	0	0	0	0	0	0	0	0	0	0	0	0	0
New.CleanUp.ReferenceOTU119575	0	0	0	0	0	0	0	0	0	0	4	0	0	0	0	0	0	0	0	0	0	0	0	0	0	0	0	0	3	0	0	0	0	0	0	0	0	0	0	0	0	3	0	0	0	0	0	0	0
New.ReferenceOTU882	0	0	129	0	0	0	0	0	0	0	0	3	0	0	0	0	0	0	0	3	0	5	0	0	0	4	0	0	0	0	0	0	0	0	0	0	0	0	0	0	0	0	0	0	0	0	0	0	0
32182	0	0	3	0	0	0	0	0	0	0	0	0	0	0	0	0	0	0	0	0	0	0	0	0	0	0	0	0	0	0	0	0	0	0	0	0	0	0	0	0	0	0	0	0	0	0	0	0	0
16195	0	0	0	0	0	0	0	0	0	0	0	0	0	0	0	0	0	0	0	0	0	0	0	0	0	0	0	0	0	0	0	0	0	0	0	0	0	0	0	0	0	0	0	0	0	0	0	0	0
376862	0	0	0	0	0	0	0	0	0	0	0	0	0	0	0	0	0	0	0	0	0	0	0	0	0	0	0	0	0	0	0	0	0	0	0	0	0	0	0	0	0	0	0	0	0	0	0	0	0
1058952	0	0	0	0	0	0	0	0	0	0	0	0	0	0	0	0	0	0	0	0	0	0	0	0	0	0	0	0	0	0	0	0	0	0	0	0	0	0	0	0	0	0	0	0	0	0	0	0	0
828483	35	65	191	0	102	2429	39	133	426	207	493	78	56	130	806	597	39	250	0	39	1934	1741	437	159	1051	397	149	1541	220	511	186	1060	2450	136	518	278	120	89	89	163	105	282	3916	185	144	884	127	456	218
847670	0	52	0	0	83	285	15	26	140	146	84	166	50	0	760	181	44	377	0	0	2338	29	328	160	127	62	28	46	125	213	40	216	2388	377	165	72	99	130	28	58	130	58	3946	3	36	95	104	88	10
4452634	0	59	4	0	142	133	30	21	112	223	63	492	208	0	607	156	45	26	371	10	1117	124	150	103	195	205	85	101	307	116	94	76	248	220	76	108	120	668	14	77	45	14	3475	4	18	0	73	34	0
287388	0	0	0	0	0	0	0	0	0	0	0	0	0	0	0	0	0	0	0	0	0	0	0	0	0	0	0	0	0	0	0	0	0	0	0	0	0	0	0	0	0	0	0	0	0	0	0	0	0
650343	0	0	0	0	0	33	0	0	0	0	0	0	0	0	0	0	0	0	0	0	0	0	0	0	0	0	0	0	0	0	0	0	0	0	0	0	0	0	0	0	0	0	0	0	0	0	0	0	0
282549	0	0	0	0	0	0	0	0	0	0	0	0	0	0	0	0	0	0	0	0	0	0	0	0	0	0	0	0	0	0	0	0	0	0	0	0	0	0	0	0	0	0	0	0	0	0	0	0	0
299371	0	0	0	0	0	0	0	0	0	0	0	0	0	0	0	0	0	0	0	0	0	0	0	0	0	0	0	0	0	0	0	0	0	0	0	3	0	0	0	0	0	0	0	0	0	0	0	0	0
193894	0	5	0	0	5	0	14	4	40	0	15	13	7	0	7	9	4	0	5	3	179	89	5	46	27	17	27	39	5	20	24	44	0	9	4	0	0	15	4	91	0	4	41	4	0	0	7	0	8
New.ReferenceOTU146	0	9	13	0	4	63	29	7	0	145	15	72	40	0	0	11	10	0	0	16	0	186	72	111	61	26	48	65	54	24	34	21	10	29	34	59	79	95	4	178	9	24	0	0	15	0	20	5	6
New.ReferenceOTU637	0	0	0	0	0	0	0	0	0	0	0	0	0	0	0	0	0	0	0	0	0	0	0	0	0	0	0	0	0	0	0	0	0	0	0	0	0	0	0	0	0	0	0	0	0	0	0	0	0
557627	0	4	0	0	5	15	0	0	21	8	4	19	13	14	18	13	0	27	0	0	65	11	11	5	7	8	0	10	7	9	9	19	70	10	9	7	12	17	3	3	4	0	85	0	0	8	5	5	0
New.ReferenceOTU765	0	3	3	0	0	16	0	7	20	9	19	0	0	0	27	20	0	6	0	0	41	7	12	6	10	3	9	44	18	22	0	35	66	4	13	8	5	3	0	3	7	7	139	10	4	21	3	12	5
New.ReferenceOTU1041	0	0	0	0	0	0	0	0	0	0	0	0	0	0	0	0	0	0	0	0	0	0	0	0	0	0	0	0	0	0	0	0	0	0	0	0	0	0	0	0	0	0	0	0	0	0	0	0	0
New.CleanUp.ReferenceOTU331334	0	0	0	0	0	5	0	5	19	5	3	0	4	0	47	11	0	5	0	0	20	3	11	3	6	0	6	19	5	11	0	15	41	4	15	3	0	4	0	0	3	8	67	4	0	13	0	14	0
305441	0	3	0	0	0	17	0	0	0	0	0	0	0	4	38	0	0	0	0	0	0	9	0	0	15	5	0	0	0	0	0	0	0	0	22	0	0	0	0	0	0	0	0	0	0	0	0	0	0
New.CleanUp.ReferenceOTU31972	0	0	0	0	11	0	0	0	0	0	0	4	0	0	4	0	59	0	0	0	0	47	0	0	0	0	0	0	15	3	0	0	0	0	0	0	0	18	0	240	0	0	0	0	0	0	0	0	0
New.ReferenceOTU461	0	0	0	0	0	0	0	0	0	0	0	0	0	0	0	0	0	0	0	0	0	0	0	0	0	0	0	0	0	0	0	0	5	0	0	0	0	0	0	0	0	0	0	0	0	0	0	0	0
New.ReferenceOTU592	0	0	0	0	0	0	0	0	0	0	0	0	0	0	0	0	0	0	0	0	0	0	0	0	0	0	0	0	0	0	0	0	0	0	0	0	0	0	0	0	0	0	0	0	0	0	0	0	0
New.ReferenceOTU532	0	0	0	0	0	6	0	0	0	0	0	0	0	0	0	0	0	0	0	0	0	8	0	0	8	0	0	0	0	0	0	0	0	0	0	0	0	0	0	0	0	0	0	0	0	0	0	0	0
New.CleanUp.ReferenceOTU334383	0	0	0	0	0	0	0	0	0	0	0	0	0	0	0	0	0	0	0	0	0	0	0	0	0	0	0	0	0	0	0	0	0	0	0	0	0	0	0	0	0	0	0	0	0	0	0	0	0
296420	0	0	0	0	0	0	0	0	0	3	0	0	0	0	0	0	0	0	0	0	0	0	0	0	0	0	0	0	0	0	0	0	0	0	3	0	5	0	0	0	0	0	0	0	0	0	0	0	0
190766	0	0	0	0	10	0	0	0	3	9	0	21	6	0	15	10	0	0	5	0	28	3	6	4	12	6	3	6	6	5	6	5	8	6	4	5	0	18	0	6	3	0	238	0	0	0	3	3	0
New.CleanUp.ReferenceOTU345006	0	0	0	0	0	0	0	0	0	0	0	0	0	0	0	0	0	0	0	0	0	0	0	0	0	0	0	0	0	0	0	0	15	0	0	0	0	0	0	0	0	0	0	0	0	0	0	0	0
New.ReferenceOTU892	0	0	0	0	0	0	0	0	0	0	0	0	0	0	0	0	0	0	0	0	0	0	0	0	0	0	0	0	0	0	0	0	0	0	0	0	0	0	0	0	0	0	0	0	0	0	0	0	0
New.ReferenceOTU862	0	0	0	0	0	0	0	0	0	0	0	0	0	67	0	0	0	0	0	0	0	26	0	0	0	0	0	0	0	0	0	0	0	0	0	0	0	0	0	0	0	0	0	0	0	0	0	0	0
330043	0	0	0	0	0	0	0	0	0	0	0	0	0	0	0	0	0	0	0	0	0	0	0	0	0	0	0	0	0	0	0	0	0	0	0	0	0	0	0	0	0	0	0	0	0	0	0	0	0
197060	0	0	0	0	0	0	0	0	0	0	0	0	0	0	0	0	0	0	0	0	0	0	0	0	0	0	0	0	0	0	0	0	0	0	0	0	0	0	0	0	0	0	0	0	0	0	0	0	0
New.CleanUp.ReferenceOTU129969	0	0	0	0	8	0	0	0	6	4	0	20	6	0	8	4	0	0	14	0	17	5	5	0	3	4	4	0	13	3	0	0	5	5	0	6	13	42	0	0	0	0	81	0	0	0	0	0	0
724298	0	0	0	0	0	0	0	0	0	0	0	0	0	0	0	0	0	0	0	0	0	0	0	0	0	0	0	0	0	0	0	0	0	0	0	0	0	0	0	0	0	0	0	0	0	0	0	0	0
New.CleanUp.ReferenceOTU17920	0	0	0	0	0	0	0	0	0	0	0	0	0	0	0	0	0	0	0	0	0	0	0	0	0	0	0	0	0	0	0	0	0	0	0	0	0	0	0	0	0	0	0	0	0	0	0	0	0
590450	0	0	0	0	0	0	0	0	0	0	0	0	0	0	0	0	0	0	0	0	0	0	0	0	0	0	0	0	0	0	0	0	0	0	0	0	0	0	0	0	0	0	0	0	0	0	0	0	0
New.CleanUp.ReferenceOTU80387	0	0	0	0	0	0	0	0	0	0	0	0	0	0	0	0	0	0	0	0	0	0	0	0	0	0	0	0	0	0	0	0	0	0	0	0	0	0	0	0	0	0	0	0	0	0	0	0	0
New.ReferenceOTU741	0	0	0	0	0	0	0	0	0	0	0	0	0	4	0	0	0	0	0	0	0	6	0	3	0	0	5	4	0	3	3	0	0	0	8	0	0	0	0	0	0	0	0	0	0	0	0	0	0
New.CleanUp.ReferenceOTU37991	0	0	0	0	0	0	0	0	0	0	0	0	0	0	0	0	0	0	0	0	0	0	0	0	0	0	0	0	0	0	0	0	0	0	0	0	0	0	0	0	0	0	0	0	0	0	0	0	0
New.CleanUp.ReferenceOTU134476	0	0	0	0	0	0	0	3	0	0	0	0	0	0	0	0	0	5	0	0	0	0	3	0	0	0	0	0	4	3	0	0	0	0	0	0	0	0	0	0	0	0	0	0	0	0	0	0	0
New.CleanUp.ReferenceOTU140114	0	0	0	0	0	0	0	0	0	0	0	0	0	0	0	0	0	0	0	0	0	0	0	0	0	0	0	0	0	0	0	0	0	0	0	0	0	0	0	0	0	0	0	0	0	0	0	0	0
291715	0	0	0	0	4	0	0	3	0	0	0	3	0	0	0	0	3	6	0	0	0	0	4	0	0	0	0	0	3	4	0	0	0	0	0	0	0	0	0	0	0	0	0	0	0	0	0	3	0
289293	0	0	0	0	0	0	0	0	0	0	0	0	0	0	0	0	0	0	0	0	0	0	5	0	0	0	0	4	0	0	0	0	4	0	0	0	0	0	0	0	0	0	4	0	0	0	0	0	0
748359	0	0	0	0	0	0	0	0	0	0	0	0	0	0	0	0	0	0	0	0	0	0	0	0	0	0	0	0	0	0	0	0	0	0	0	0	0	0	0	0	0	0	0	0	0	0	0	0	0
New.CleanUp.ReferenceOTU220408	0	0	0	0	0	0	0	0	0	3	0	0	0	0	0	3	0	0	0	0	0	0	0	0	0	0	0	0	0	0	0	0	7	0	0	0	0	0	0	0	0	0	18	0	0	0	0	0	3
313321	0	0	0	0	0	0	0	0	0	0	0	0	0	0	0	0	0	0	0	0	0	0	0	0	0	0	0	0	0	0	0	0	0	0	0	0	0	0	0	0	0	0	0	0	0	0	0	0	0
580518	0	0	0	0	0	0	0	0	0	0	0	0	0	0	0	0	0	0	0	0	0	0	0	0	0	0	0	0	0	0	0	0	0	0	0	0	0	0	0	0	0	0	0	0	0	0	0	0	0
New.CleanUp.ReferenceOTU12458	0	0	0	0	0	0	0	0	0	0	0	0	0	0	0	0	0	0	0	0	0	0	0	0	0	0	0	4	0	0	0	3	6	0	0	0	0	0	0	0	0	0	11	0	0	0	0	0	0
New.CleanUp.ReferenceOTU79366	0	0	0	0	0	0	0	0	0	0	0	0	0	0	0	0	0	0	0	0	0	0	0	0	0	0	0	0	0	0	0	0	0	0	0	0	0	0	0	0	0	0	0	0	0	0	0	0	0
New.CleanUp.ReferenceOTU228517	0	0	0	0	0	0	0	0	0	8	0	0	0	0	0	0	0	0	0	0	0	0	0	0	0	0	0	0	0	0	0	0	0	0	0	0	0	0	0	0	0	0	0	0	0	0	0	0	0
396697	0	0	0	0	0	0	0	0	0	0	0	0	0	0	0	0	0	0	0	0	0	0	0	0	4	0	0	3	0	0	0	4	0	0	3	0	0	0	0	0	0	0	0	0	0	6	0	3	0
New.CleanUp.ReferenceOTU217263	0	0	0	0	0	0	0	0	0	0	0	0	0	0	0	0	0	0	0	0	0	0	0	0	0	0	0	0	0	0	0	0	0	0	0	0	0	0	0	0	0	0	0	0	0	0	0	0	0
426638	0	0	0	0	0	0	0	0	0	0	0	0	0	0	0	0	0	0	0	0	0	0	0	0	0	0	0	0	0	0	0	0	0	0	0	0	0	0	0	0	0	0	0	0	0	0	0	0	0
New.CleanUp.ReferenceOTU310255	0	0	0	0	0	0	0	0	0	0	0	0	0	0	0	0	0	0	0	0	0	0	0	0	0	0	0	0	0	0	0	0	0	0	0	0	0	0	0	0	0	0	0	0	0	0	0	0	0
New.CleanUp.ReferenceOTU320420	0	0	0	0	0	0	0	0	0	0	0	0	0	0	0	0	0	0	0	0	0	0	0	0	0	0	0	0	0	0	0	0	0	0	0	0	0	0	0	0	0	0	0	0	0	0	0	0	0
313142	0	0	0	0	0	7	0	0	0	0	0	0	0	0	0	0	0	0	0	0	0	0	0	0	0	0	0	0	0	0	0	0	0	0	0	0	0	0	0	0	0	0	3	0	0	0	0	0	0
179930	0	0	0	0	0	0	0	0	0	0	0	0	0	0	0	0	0	0	0	0	3	0	0	0	0	0	0	0	0	0	0	0	4	0	0	0	0	0	0	0	0	0	6	0	0	0	0	0	0
New.CleanUp.ReferenceOTU158679	0	0	0	0	0	0	0	0	0	0	0	0	0	0	0	0	0	0	0	0	0	0	0	0	0	0	0	0	0	0	0	0	0	0	0	0	0	0	0	0	0	0	0	0	0	0	0	0	0
New.CleanUp.ReferenceOTU335534	0	0	0	0	0	0	0	0	0	0	0	0	0	0	0	0	0	0	0	0	5	0	0	0	0	0	0	3	0	0	0	4	3	0	0	0	0	0	0	0	0	0	10	0	0	0	0	0	0
354798	0	0	0	0	0	0	0	0	0	0	0	0	0	0	0	0	0	0	0	0	0	0	0	0	0	0	0	0	0	0	0	0	0	0	3	0	0	0	0	0	0	0	0	0	0	0	0	0	0
16186	0	0	0	0	0	0	0	0	0	0	0	0	0	0	0	0	0	0	0	0	0	0	0	0	0	0	0	0	0	0	0	0	0	0	0	0	0	0	0	0	0	0	0	0	0	0	0	0	0
4445673	0	0	0	0	0	0	0	0	0	0	0	0	0	0	7	0	0	0	0	0	4	0	0	0	0	0	0	5	0	0	0	0	0	0	0	0	0	0	0	0	0	0	0	0	0	0	0	0	0
New.CleanUp.ReferenceOTU208096	0	0	0	0	0	0	0	0	0	0	0	0	0	0	0	0	0	0	0	0	0	0	0	0	0	0	0	0	0	0	0	0	0	0	0	0	0	0	0	0	0	0	0	0	0	0	0	0	0
4452700	0	0	0	0	0	0	0	0	0	0	0	0	0	0	0	0	0	0	0	0	0	0	0	0	0	0	0	0	0	0	0	0	0	0	0	0	0	0	0	0	0	0	0	0	0	0	0	0	0
New.CleanUp.ReferenceOTU28963	0	0	0	0	0	0	0	0	0	0	0	0	0	0	0	0	0	0	0	0	0	0	0	0	0	0	0	0	0	0	0	0	0	0	0	0	0	0	0	0	0	0	0	0	0	0	0	0	0
New.CleanUp.ReferenceOTU85294	0	0	0	0	0	0	0	0	0	0	0	0	0	0	0	0	0	0	0	0	0	0	0	0	0	0	0	0	0	0	0	0	0	0	0	0	0	0	0	0	0	0	3	0	0	0	0	0	0
New.CleanUp.ReferenceOTU101382	0	0	0	0	0	0	0	0	0	0	0	0	0	0	0	0	0	0	0	0	0	0	0	0	0	0	0	0	0	0	0	0	0	0	0	0	0	0	0	0	0	0	0	0	0	0	0	0	0
1128945	0	0	0	0	0	4	0	0	18	0	0	0	0	0	0	0	0	0	0	0	0	0	0	5	0	0	0	0	0	0	0	0	0	0	0	0	0	0	0	0	0	0	0	0	0	0	0	0	0
New.CleanUp.ReferenceOTU97069	0	0	0	0	0	0	0	0	0	0	0	0	0	0	0	0	0	0	0	0	0	0	0	0	0	0	0	0	0	0	0	0	0	0	0	0	0	0	0	0	0	0	0	0	0	0	0	0	0
309030	0	0	0	0	0	0	0	0	0	0	0	0	0	0	0	0	0	0	0	0	4	0	0	0	0	0	0	5	0	3	0	0	0	0	0	0	0	0	0	0	0	0	0	0	0	4	0	0	0
New.CleanUp.ReferenceOTU58461	0	0	0	0	0	0	0	0	0	0	0	0	0	0	0	0	0	0	0	0	0	0	0	0	0	0	0	0	0	0	0	0	0	0	0	0	0	0	0	0	0	0	0	0	0	0	0	0	0
587789	0	0	0	0	0	0	0	0	0	0	0	0	0	0	0	0	0	0	0	0	0	0	0	0	0	0	0	0	0	0	0	0	0	0	0	0	0	0	0	0	0	0	0	0	0	0	0	0	0
New.CleanUp.ReferenceOTU90008	0	0	0	0	0	0	0	0	0	0	0	0	0	0	0	0	0	0	0	0	0	0	0	0	0	0	0	0	0	0	0	0	7	0	0	0	0	0	0	0	0	0	0	0	0	0	0	0	0
New.ReferenceOTU485	0	0	0	0	0	0	14	8	0	0	5	8	0	0	0	22	0	11	0	0	0	16	4	0	0	0	12	0	3	16	0	3	0	0	3	0	0	4	0	0	0	0	0	0	0	0	3	6	0
542096	0	36	0	0	16	0	0	6	17	127	0	0	30	5955	1613	0	0	0	0	25	0	0	0	0	157	0	0	47	3	0	0	0	0	52	218	0	5	64	0	0	0	0	0	0	0	0	0	0	0
New.ReferenceOTU178	0	0	0	0	0	0	0	0	0	44	0	0	0	0	0	0	0	0	0	0	0	0	0	0	0	0	0	0	0	0	0	0	0	0	0	0	0	0	0	0	0	0	0	0	0	0	0	3	0
New.ReferenceOTU1004	0	5	0	0	0	0	0	27	40	48	0	0	13	1036	315	4	0	0	0	14	0	3	0	0	31	0	0	6	0	0	0	0	0	31	65	0	3	20	0	0	0	0	0	0	0	0	0	0	0
New.ReferenceOTU547	0	0	0	0	0	0	0	0	0	0	0	0	0	0	0	0	0	0	0	0	0	12	0	0	19	0	0	0	0	0	0	0	0	0	0	0	0	0	4	0	0	0	0	0	0	0	0	0	0
New.ReferenceOTU771	0	0	0	0	0	0	0	0	0	0	0	0	0	0	0	0	0	0	0	0	0	0	0	0	0	0	0	0	0	0	0	0	0	0	0	0	0	0	0	0	0	0	0	0	0	0	0	0	0
264963	0	0	0	0	0	0	0	3	92	7	0	0	0	0	0	34	0	15	0	0	0	4	4	64	0	0	5	0	0	15	25	0	0	28	0	0	0	0	0	0	0	0	0	0	0	0	7	0	0
New.CleanUp.ReferenceOTU197120	0	0	0	0	0	0	0	0	0	0	0	0	0	0	0	0	0	0	0	0	0	0	0	0	0	0	0	0	0	0	0	0	0	0	0	0	0	0	0	0	0	0	0	0	0	0	0	0	0
580044	0	0	0	0	0	0	0	0	0	0	0	0	0	0	0	0	0	0	0	0	0	0	0	0	0	0	0	0	0	0	0	0	0	0	0	0	0	0	0	0	0	0	0	0	0	0	0	0	0
324386	0	0	0	0	0	0	0	16	0	14	0	0	0	0	79	0	0	0	0	6	0	0	0	0	7	0	0	0	0	0	0	0	0	0	15	0	0	0	0	0	0	0	0	0	0	0	0	0	0
New.CleanUp.ReferenceOTU22632	0	0	0	0	0	0	0	0	0	0	0	0	0	0	0	0	0	0	0	0	0	0	0	0	0	0	0	0	0	0	0	0	0	0	0	0	0	0	0	0	0	0	0	0	0	0	0	0	0
578649	0	0	0	0	0	0	0	0	0	4	0	0	0	85	29	0	0	0	0	0	0	0	0	0	6	0	0	0	0	0	0	0	0	0	5	0	0	0	0	0	0	0	0	0	0	0	0	0	0
846386	0	0	0	0	0	0	0	0	0	0	0	0	0	0	0	0	0	0	0	0	0	0	0	0	0	0	0	0	0	0	0	0	0	0	0	0	0	0	0	0	0	0	0	0	0	0	0	0	0
New.CleanUp.ReferenceOTU60436	0	0	0	0	0	0	0	0	0	0	0	0	0	0	0	0	0	0	0	0	0	3	0	0	0	0	0	0	0	0	0	0	0	0	0	0	0	0	0	0	0	0	0	0	0	0	0	0	0
New.CleanUp.ReferenceOTU41024	0	0	0	0	0	0	0	0	0	0	0	0	5	0	0	0	0	0	0	4	0	0	0	0	0	0	0	0	0	0	0	0	0	0	9	0	0	0	0	0	0	0	0	0	0	0	0	0	0
833816	0	0	0	0	0	0	0	0	0	0	0	0	0	119	23	0	0	0	0	0	0	0	0	0	0	0	0	0	0	0	0	0	0	0	0	0	0	0	0	0	0	0	0	0	0	0	0	0	0
New.CleanUp.ReferenceOTU209190	0	0	0	0	0	0	0	4	3	0	0	0	0	0	0	0	0	0	0	0	0	0	0	0	0	0	0	0	0	0	0	0	0	0	0	0	0	0	0	0	0	0	0	0	0	0	0	0	0
New.CleanUp.ReferenceOTU291753	0	0	0	0	0	0	0	0	0	0	0	0	0	0	0	0	0	0	0	0	0	0	0	0	0	0	0	0	0	0	0	0	0	0	0	0	0	0	0	0	0	0	0	0	0	0	0	0	0
584765	0	0	0	0	0	0	0	0	0	0	0	0	0	16	8	0	0	0	0	0	0	0	0	0	0	0	0	0	0	0	0	0	0	0	0	0	0	0	0	0	0	0	0	0	0	0	0	0	0
575261	0	0	0	0	0	0	0	0	0	0	0	0	0	72	12	0	0	0	0	0	0	0	0	0	0	0	0	0	0	0	0	0	0	0	0	0	0	0	0	0	0	0	0	0	0	0	0	0	0
New.CleanUp.ReferenceOTU74068	0	0	0	0	0	0	0	0	13	0	0	0	0	0	0	8	0	4	0	0	0	0	0	16	0	0	0	0	0	3	6	0	0	7	0	0	0	0	0	0	0	0	0	0	0	0	0	0	0
4456605	0	0	0	0	0	0	0	0	0	0	0	0	0	63	12	0	0	0	0	0	0	0	0	0	0	0	0	0	0	0	0	0	0	0	3	0	0	0	0	0	0	0	0	0	0	0	0	0	0
753891	0	0	0	0	0	0	0	0	0	0	0	0	0	57	5	0	0	0	0	3	0	0	0	0	0	0	0	0	0	0	0	0	0	0	0	0	0	0	0	0	0	0	0	0	0	0	0	0	0
708680	0	0	0	0	0	0	0	0	0	0	0	0	0	0	0	0	0	0	0	0	0	0	0	0	0	0	0	0	0	0	0	0	0	0	0	0	0	0	0	0	0	0	0	0	0	0	0	0	0
New.CleanUp.ReferenceOTU4911	0	0	0	0	0	0	0	0	0	0	7	0	0	0	0	56	0	0	0	0	0	0	0	115	6	0	0	0	0	0	0	0	0	0	0	0	0	0	0	0	0	0	0	0	0	0	0	0	0
561193	0	0	0	0	0	0	0	0	0	5	0	0	0	0	0	0	0	0	0	0	0	0	0	0	0	0	0	10	0	0	0	0	0	0	6	0	0	0	0	0	0	0	0	0	0	0	0	0	0
307638	0	0	0	0	0	0	0	9	27	0	0	0	0	11	0	4	0	0	0	26	0	0	0	0	0	0	0	0	0	3	6	0	0	23	0	0	0	0	0	0	0	0	0	0	0	0	0	0	0
New.CleanUp.ReferenceOTU158024	0	0	0	0	0	0	0	0	0	0	0	0	0	0	0	0	0	0	0	0	0	0	0	0	0	0	0	0	0	0	0	0	0	0	0	0	0	0	0	0	0	0	0	0	0	0	0	0	0
New.CleanUp.ReferenceOTU128619	0	0	0	0	0	0	0	0	0	0	0	0	0	0	0	0	0	0	0	0	0	0	0	0	0	0	0	0	0	0	0	0	0	0	0	0	0	0	0	0	0	0	0	0	0	0	0	0	0
New.CleanUp.ReferenceOTU289467	0	0	0	0	0	0	0	0	0	0	0	0	0	0	0	0	0	0	0	0	0	0	0	0	0	0	0	0	0	0	0	0	0	0	0	0	0	0	0	0	0	0	0	0	0	0	0	0	0
New.CleanUp.ReferenceOTU296388	0	0	0	0	0	0	0	0	7	0	0	0	0	0	0	0	0	0	0	0	0	0	0	0	0	0	0	0	0	0	0	0	0	0	0	0	0	0	0	0	0	0	0	0	0	0	0	0	0
566213	13	310	194	0	243	95	416	921	1899	406	1261	196	465	756	772	2778	28	862	59	192	2042	3114	512	2379	789	155	832	1563	322	1718	1627	1448	212	875	2442	107	394	226	335	62	321	173	1437	13	139	195	535	228	172
288718	13	102	286	0	48	603	237	337	1196	427	414	181	136	7	555	1292	44	628	0	52	1902	811	218	1397	234	186	351	2635	187	714	293	1271	69	356	404	223	186	92	97	255	116	184	939	0	123	1387	127	256	173
14124	5	0	0	0	4	0	0	129	9294	124	2909	10	13	0	0	741	0	485	0	11	5718	1516	195	4791	353	0	421	0	8	4376	61	0	26	1566	0	0	16	3	207	0	137	3	0	0	4	0	1219	0	0
298247	23	59	79	0	3	53	19	45	64	39	38	4	10	57	377	54	0	34	0	16	0	99	10	0	54	13	27	106	5	54	164	92	28	13	854	0	42	16	8	0	29	13	0	0	13	0	14	23	15
New.ReferenceOTU289	0	0	0	0	0	0	10	15	0	3	21	0	0	0	0	0	0	0	506	6	0	33	0	0	30	10	49	0	0	6	34	41	7	0	44	0	0	0	3	0	0	3	0	0	3	0	7	3	0
815369	5	58	41	0	60	55	65	128	357	116	295	80	172	60	73	531	11	390	33	41	950	792	158	540	131	47	118	247	85	379	274	199	50	185	456	17	97	62	98	33	93	33	38	0	42	105	120	47	59
New.ReferenceOTU411	0	5	12	0	0	0	155	59	0	0	47	0	0	77	0	10	0	19	0	19	0	175	0	0	56	3	46	164	3	9	128	124	0	6	15	0	0	0	104	0	0	6	0	0	0	0	54	0	0
823165	0	6	6	0	23	96	11	25	35	68	41	30	42	21	5	122	0	39	0	5	4	93	6	27	32	13	36	55	35	59	37	54	7	57	73	19	18	11	8	54	4	8	12	0	6	8	17	5	10
262610	0	0	0	0	0	0	3	0	0	0	0	0	4	0	0	0	0	0	0	0	0	3	0	0	0	13	0	586	0	0	0	541	0	0	85	3	0	0	0	0	0	46	5	0	13	257	0	16	74
New.ReferenceOTU719	0	0	0	0	0	0	50	16	0	3	16	0	0	35	0	0	0	3	0	7	0	22	0	0	3	0	14	12	0	3	111	10	0	0	11	0	0	0	12	0	0	0	0	0	0	0	6	3	0
New.CleanUp.ReferenceOTU205884	0	0	0	0	0	0	0	0	0	0	0	3	4	0	0	0	0	0	0	0	0	0	0	0	0	0	0	276	0	0	0	262	0	0	33	0	0	0	0	0	0	19	0	0	4	106	0	7	24
New.ReferenceOTU792	0	0	0	0	0	0	0	0	19	17	16	0	0	0	0	4	0	0	0	0	0	0	3	0	0	0	0	0	0	17	0	0	11	15	0	0	11	5	0	0	0	0	0	0	0	0	0	0	0
294352	0	0	0	0	0	0	0	0	0	0	0	0	0	0	0	0	0	0	0	0	0	0	0	0	0	0	0	0	0	0	0	0	0	0	0	0	0	0	0	0	0	0	0	0	0	0	0	0	0
New.CleanUp.ReferenceOTU258144	0	0	4	0	0	0	0	3	0	0	0	0	0	0	4	0	0	0	0	0	0	9	0	0	0	3	4	7	0	0	6	0	0	0	46	0	0	0	0	0	3	0	0	0	0	0	0	0	0
New.ReferenceOTU1140	0	8	0	0	0	5	6	9	39	13	19	10	9	4	3	38	0	17	0	0	69	61	21	72	6	4	10	37	8	19	21	21	0	22	11	0	6	0	9	0	8	6	0	0	0	11	0	0	3
New.ReferenceOTU783	0	0	0	0	0	0	5	3	9	0	5	0	0	0	0	10	0	15	0	0	0	6	0	0	4	0	8	0	3	18	18	5	0	0	82	0	0	0	0	0	3	0	0	0	0	0	5	0	0
New.CleanUp.ReferenceOTU359491	0	0	4	0	0	11	4	9	31	10	13	8	5	0	8	44	0	22	0	0	21	19	10	31	0	3	14	56	0	24	0	21	0	12	4	0	0	4	0	4	5	6	22	0	0	21	4	8	5
New.ReferenceOTU175	0	0	0	0	0	0	0	0	0	0	0	0	0	0	0	0	0	0	0	0	0	0	0	0	0	0	0	0	0	0	0	0	0	0	0	0	0	0	0	0	0	0	0	0	0	0	0	0	0
New.ReferenceOTU1021	0	0	0	0	0	0	0	0	0	0	0	0	0	0	0	0	0	0	0	0	0	0	0	0	0	0	0	0	0	0	0	4	0	0	0	0	0	0	0	0	0	3	0	0	0	0	0	0	0
New.ReferenceOTU806	0	0	0	0	0	0	0	0	145	0	47	0	0	0	0	8	0	12	0	0	104	17	0	92	3	0	9	0	0	67	4	0	0	19	0	0	0	0	4	0	0	0	0	0	0	0	19	0	0
New.CleanUp.ReferenceOTU269958	0	0	0	0	3	0	3	14	0	0	6	5	0	0	0	35	0	16	0	0	0	13	3	0	0	0	19	0	8	33	0	0	0	0	9	0	0	0	0	0	0	4	0	0	0	0	5	4	4
1146798	0	0	0	0	0	0	0	0	0	0	0	0	0	0	0	0	0	0	0	0	0	0	0	0	0	0	0	0	0	0	0	0	0	0	0	0	0	0	0	0	0	0	0	0	0	0	0	0	0
New.ReferenceOTU1136	0	0	0	0	0	0	0	3	21	5	16	5	0	0	0	43	0	9	0	0	6	33	0	21	5	0	12	0	0	29	9	4	3	10	0	0	0	0	4	0	3	0	0	0	0	0	6	3	3
New.CleanUp.ReferenceOTU103046	5	0	0	0	0	0	0	0	0	4	9	0	0	0	0	17	0	0	0	0	0	6	0	0	0	0	0	3	0	0	0	3	0	0	0	0	0	0	0	0	0	0	0	0	0	0	0	0	0
3829951	0	0	0	0	0	0	0	0	0	0	0	0	0	0	8	0	0	0	0	0	0	0	0	0	0	0	0	0	0	3	0	3	0	0	10	0	0	0	0	0	0	0	0	0	0	0	0	0	0
New.CleanUp.ReferenceOTU55982	0	0	0	0	0	0	3	4	0	0	0	0	0	0	0	3	0	6	0	0	0	11	3	0	0	0	6	0	0	4	0	0	0	0	15	0	0	0	0	0	0	0	0	0	0	0	0	0	4
New.CleanUp.ReferenceOTU212585	0	0	0	0	0	0	0	0	0	0	0	0	0	0	0	0	0	0	0	0	0	0	0	0	0	0	0	0	0	0	0	0	0	0	0	0	0	0	0	0	0	0	0	0	0	0	0	0	0
New.ReferenceOTU1027	0	0	0	0	0	0	0	0	0	3	4	0	0	0	0	0	0	0	0	0	0	3	3	0	0	0	0	15	0	0	0	12	0	0	4	0	0	0	0	0	0	3	0	0	0	0	0	0	0
50432	0	0	0	0	0	0	0	0	8	0	5	0	0	0	0	8	0	3	0	0	12	9	0	3	0	0	0	0	0	0	5	0	0	0	3	0	0	0	0	0	0	0	4	0	0	0	5	0	0
New.CleanUp.ReferenceOTU269183	0	0	0	0	0	0	0	0	0	0	0	0	0	0	0	0	0	0	0	0	0	0	0	0	0	0	0	0	0	0	0	0	75	0	0	0	0	0	0	0	0	0	0	0	0	0	0	0	0
4445132	0	0	0	0	0	0	0	0	0	0	0	0	0	0	0	0	0	0	0	0	0	0	0	0	0	0	0	0	0	0	0	0	0	0	0	0	0	0	0	0	0	0	0	0	0	0	0	0	0
New.CleanUp.ReferenceOTU53815	0	0	0	0	7	0	0	0	0	94	0	0	0	0	0	0	0	0	0	0	0	0	0	0	0	0	0	0	0	0	0	0	0	0	0	4	0	0	0	0	0	0	0	0	0	0	0	0	0
New.ReferenceOTU415	0	0	0	0	0	0	0	3	7	0	7	0	0	0	0	9	0	6	0	0	14	18	0	18	0	3	0	10	0	5	0	0	0	3	4	0	0	0	3	0	4	0	0	0	0	0	0	0	0
New.CleanUp.ReferenceOTU251178	0	0	0	0	0	0	0	0	3	0	24	0	3	0	0	8	0	14	0	0	0	17	0	5	0	0	10	0	0	28	0	0	0	0	0	0	0	0	5	0	0	0	0	0	0	0	8	0	0
New.CleanUp.ReferenceOTU135047	0	0	0	0	0	0	0	0	0	0	0	0	7	0	0	0	0	4	0	0	0	0	0	0	0	0	0	0	0	0	0	0	0	0	0	0	0	0	0	4	0	0	0	0	0	0	0	0	0
New.CleanUp.ReferenceOTU13990	0	0	0	0	0	0	0	0	0	0	0	0	0	0	0	0	0	0	0	0	0	0	0	0	0	0	0	0	0	0	0	0	0	0	6	0	0	0	0	0	0	0	0	0	0	0	0	0	0
New.CleanUp.ReferenceOTU138368	0	0	0	0	0	0	0	0	0	0	0	0	0	0	0	0	0	0	0	0	0	0	0	0	0	0	0	21	0	0	0	3	0	0	0	0	0	0	0	0	0	0	0	0	0	0	0	0	0
New.CleanUp.ReferenceOTU210477	0	0	0	0	0	0	0	0	0	0	0	0	0	0	0	0	0	0	0	0	0	0	0	0	0	0	0	0	0	0	0	0	0	0	0	0	0	0	0	0	0	0	0	0	0	0	0	0	0
1658639	0	0	0	0	0	0	0	0	0	0	0	0	0	0	0	0	0	0	0	0	0	0	0	0	0	0	0	0	0	0	0	0	0	0	11	0	0	0	0	0	0	0	0	0	0	0	0	0	0
New.CleanUp.ReferenceOTU204553	0	0	0	0	0	0	0	0	0	0	0	0	0	0	0	0	0	0	0	0	0	0	0	0	0	0	0	0	0	0	0	0	0	0	0	0	0	0	0	0	0	0	0	0	0	0	0	0	0
New.ReferenceOTU1057	0	0	0	0	0	0	0	0	0	0	0	0	0	0	0	0	0	0	0	0	0	0	0	0	0	0	0	0	0	0	0	0	0	0	0	0	0	0	0	0	0	0	0	0	0	0	6	0	0
New.CleanUp.ReferenceOTU77038	0	0	0	0	0	0	0	0	0	0	4	0	0	0	0	0	0	0	0	0	0	0	0	0	0	0	0	0	0	0	0	0	0	0	14	0	0	0	0	0	0	0	0	0	0	0	0	0	0
New.CleanUp.ReferenceOTU130266	0	0	0	0	0	0	0	0	0	0	0	0	0	0	0	0	0	0	0	0	0	3	0	0	0	0	0	0	0	0	0	0	0	0	0	0	0	0	0	0	0	0	0	0	0	0	0	0	0
New.CleanUp.ReferenceOTU337350	0	0	0	0	0	0	0	0	0	0	0	4	0	0	0	5	0	6	0	0	0	10	3	0	0	0	5	0	0	4	0	0	0	0	3	0	0	0	0	0	0	0	0	0	0	0	0	0	0
New.CleanUp.ReferenceOTU58359	0	0	0	0	0	0	0	0	0	0	0	0	0	0	0	0	0	0	0	0	0	0	0	0	0	0	0	21	0	0	0	17	0	0	0	0	0	0	0	0	0	0	0	0	0	5	0	0	0
New.ReferenceOTU758	0	0	0	0	0	0	0	0	0	0	0	0	0	0	0	0	0	0	0	0	0	0	0	0	0	0	0	0	0	0	0	0	0	0	0	0	0	0	0	0	0	0	0	0	0	0	0	0	0
New.CleanUp.ReferenceOTU176399	0	0	0	0	0	0	0	0	0	0	0	0	0	0	0	0	0	0	0	0	0	0	0	0	0	0	0	0	0	0	0	0	0	0	0	0	0	0	0	0	0	0	0	0	0	0	0	0	0
New.CleanUp.ReferenceOTU205990	0	0	0	0	0	0	0	0	0	0	0	0	0	0	0	0	0	0	0	0	0	0	0	0	0	0	0	0	0	0	0	0	0	0	0	0	0	0	0	0	0	0	0	0	0	0	0	0	0
New.CleanUp.ReferenceOTU179685	0	0	0	0	0	0	0	0	0	0	0	0	0	0	0	0	0	0	0	0	0	0	0	0	0	0	0	0	0	0	0	0	0	0	6	0	0	0	0	0	0	0	0	0	0	0	0	0	0
New.CleanUp.ReferenceOTU79752	0	0	0	0	0	0	0	0	0	0	0	3	0	0	0	0	0	0	0	0	0	0	0	0	0	0	0	0	0	0	0	0	0	0	0	0	0	0	0	0	0	0	0	0	0	0	0	0	0
1147978	0	0	0	0	0	0	0	0	0	0	0	0	0	0	0	0	0	0	0	0	0	0	0	0	0	0	0	0	0	0	0	0	25	0	0	0	0	0	0	0	0	0	0	0	0	0	0	0	0
New.CleanUp.ReferenceOTU261737	0	0	0	0	0	0	0	0	0	0	0	0	0	0	0	0	0	0	0	0	0	0	0	0	0	0	0	0	0	0	0	0	0	0	4	0	0	0	0	0	0	0	0	0	0	0	0	0	0
New.CleanUp.ReferenceOTU247720	0	0	0	0	0	0	3	0	0	0	0	0	0	0	0	0	0	0	0	0	0	0	0	0	0	0	0	0	0	0	0	0	0	0	0	0	0	0	0	0	0	0	0	0	0	0	0	0	0
580674	0	0	0	0	0	0	0	0	0	0	0	0	0	0	0	0	0	0	0	0	0	0	0	0	0	0	0	0	0	0	0	0	0	0	0	0	0	0	0	0	0	0	0	0	0	0	0	0	0
4377715	0	0	0	0	0	0	0	0	0	0	0	0	0	0	0	0	0	0	0	0	0	0	0	0	0	0	0	0	0	0	0	0	0	0	6	0	0	0	0	0	0	0	0	0	0	0	0	0	0
New.CleanUp.ReferenceOTU103834	0	0	0	0	0	0	0	0	0	0	0	0	0	0	0	0	0	0	0	0	0	0	0	0	0	0	0	0	0	0	0	0	0	0	0	0	0	0	0	0	0	0	0	0	0	0	0	0	0
New.CleanUp.ReferenceOTU105238	0	0	0	0	0	0	0	0	0	0	0	0	0	0	0	0	0	0	0	0	0	0	0	0	0	0	0	0	0	0	0	0	0	0	0	0	0	0	0	0	0	0	0	0	0	0	0	0	0
New.ReferenceOTU135	0	213	28	0	55	81	23	44	71	263	89	235	278	0	3	206	44	85	0	8	739	163	169	22	60	175	42	2846	89	104	47	327	0	105	179	142	297	210	20	15	140	58	0	0	357	62	86	57	26
New.CleanUp.ReferenceOTU32465	0	71	0	0	27	0	0	0	0	71	0	8	41	0	0	0	0	0	0	45	0	3	3	0	4	0	0	0	7	0	0	5	0	8	15	6	131	52	0	10	0	0	0	0	0	0	3	0	0
New.ReferenceOTU193	14	0	3	0	6	55	26	24	244	15	28	33	3	28	25	137	3	49	12	6	224	68	27	50	72	7	26	310	20	165	92	298	162	41	20	21	10	10	4	68	4	12	85	16	11	1256	10	43	16
531374	3	4	0	0	3	7	10	9	87	9	12	9	0	27	0	43	0	17	0	3	127	26	13	15	41	0	6	32	4	59	30	64	27	25	10	4	3	5	4	4	0	3	48	13	7	62	4	11	4
4370912	5	0	0	0	0	11	11	7	63	0	10	4	0	5	0	24	0	8	0	0	24	20	7	0	21	0	0	60	7	24	18	52	17	9	4	4	0	0	0	0	0	0	15	8	3	105	0	9	5
297390	0	0	0	0	0	3	3	0	18	0	3	0	0	0	0	6	0	0	0	0	152	5	0	0	6	0	0	27	0	7	3	25	11	0	0	3	0	4	0	0	0	0	8	0	0	54	0	3	4
321119	0	0	0	0	0	0	0	0	11	0	0	0	0	0	0	5	0	5	0	0	10	0	3	0	0	0	0	23	0	5	5	9	9	0	0	0	0	0	0	0	0	0	6	0	0	34	0	3	0
2658058	0	0	0	0	0	0	0	0	19	0	0	0	0	0	0	8	0	4	0	0	20	7	5	4	10	0	3	32	0	11	0	15	11	0	0	4	0	0	0	0	0	0	5	5	4	61	4	4	0
289730	0	0	0	0	0	0	0	0	13	0	0	3	0	0	0	0	0	0	0	0	3	3	0	0	3	0	0	7	0	5	0	12	0	0	0	0	0	0	0	0	0	0	5	0	0	330	0	0	0
344844	0	0	0	0	0	0	3	0	20	0	0	0	0	4	0	11	0	0	0	0	14	6	3	0	4	0	4	13	0	13	14	16	5	4	0	4	0	0	0	3	0	0	6	0	0	9	0	0	0
270200	0	0	0	0	0	0	0	0	6	0	0	0	0	0	0	3	0	0	0	0	13	3	0	0	8	0	0	19	0	5	8	12	7	0	0	0	0	0	0	0	0	0	0	0	0	28	0	0	0
4409730	0	0	0	0	0	0	0	0	10	0	0	0	0	0	0	3	0	0	0	0	10	0	0	0	0	0	0	12	0	5	7	7	3	0	0	0	0	0	0	0	0	0	4	0	0	17	0	0	0
New.ReferenceOTU314	0	0	0	0	0	0	0	0	9	0	0	0	0	0	0	7	0	0	0	0	11	0	0	0	0	0	0	0	0	4	4	6	3	0	0	0	0	0	0	0	0	0	4	0	0	10	0	0	0
New.CleanUp.ReferenceOTU145998	0	0	0	0	0	0	0	0	7	0	0	0	0	0	0	0	0	3	0	0	7	5	4	0	4	0	0	0	0	4	0	4	3	0	0	0	0	0	0	0	0	0	0	0	0	3	0	0	0
New.CleanUp.ReferenceOTU289728	0	0	0	0	0	0	3	0	0	0	5	0	0	0	0	7	0	5	0	0	0	6	0	0	0	0	0	0	0	11	0	0	0	0	0	0	0	0	0	0	0	0	0	0	0	0	0	0	0
New.CleanUp.ReferenceOTU250033	0	0	0	0	0	0	0	0	0	0	0	4	0	4	4	0	3	0	0	0	0	4	0	0	4	0	0	0	0	0	6	0	0	0	0	0	0	0	0	0	0	0	0	0	0	0	0	0	0
1121753	0	0	0	0	0	0	0	0	3	0	0	0	0	0	0	4	0	0	0	0	3	0	0	0	0	0	0	4	0	0	0	4	3	0	0	3	0	0	0	0	0	0	0	0	0	11	0	0	0
347553	0	0	0	0	0	0	0	0	0	0	0	0	0	0	0	3	0	0	0	0	3	0	0	0	0	0	0	0	0	0	3	4	0	0	0	0	0	0	0	0	0	0	0	0	0	4	0	0	0
New.CleanUp.ReferenceOTU96700	0	0	0	0	0	0	0	0	0	0	0	0	0	0	0	0	0	0	0	0	7	0	0	0	0	0	0	0	0	0	0	0	0	0	0	0	0	0	0	0	0	0	0	0	0	0	0	0	0
New.CleanUp.ReferenceOTU146309	0	0	0	0	0	0	0	0	9	0	0	0	0	0	0	0	0	0	0	0	0	0	0	0	0	0	0	0	0	0	0	4	0	0	0	0	0	0	0	0	0	0	0	0	0	0	0	0	0
712677	327	219	200	3	162	841	750	489	3587	573	547	739	154	869	1277	2555	115	1071	272	206	5199	1374	772	714	1529	243	472	7797	398	2466	1877	6507	3276	637	429	1182	283	261	188	503	116	314	2273	426	429	18033	287	807	415
628226	3	18	5	0	9	206	31	56	46	42	19	29	21	0	6	35	27	32	5	37	30	68	70	0	36	29	27	2879	93	73	32	2502	236	5	66	93	34	24	0	131	0	27	8	57	35	9562	5	135	118
New.ReferenceOTU437	0	0	0	0	0	32	0	0	14	0	0	4	0	0	0	0	0	0	0	0	0	0	11	0	0	3	0	13	12	3	0	236	22	0	0	13	7	0	0	10	0	0	0	3	0	212	0	0	4
534042	0	0	0	0	0	11	4	0	32	3	7	9	0	9	0	24	0	8	3	0	43	16	6	10	13	0	0	77	5	24	16	58	23	5	3	7	4	0	3	9	0	4	11	6	0	147	7	7	3
308502	0	0	0	0	0	8	0	0	17	4	0	0	0	0	0	4	0	3	0	0	9	0	0	0	4	0	0	98	6	7	3	86	18	0	4	9	0	0	0	4	0	0	0	0	0	325	0	7	0
308802	5	0	0	0	0	0	5	0	16	3	3	0	0	3	0	9	0	0	0	0	12	3	0	3	4	0	0	18	0	10	7	13	10	0	0	0	3	0	0	0	0	0	13	0	0	71	0	0	0
141835	0	0	0	0	10	0	6	0	0	0	0	0	0	0	0	0	34	0	238	0	0	0	0	0	101	4	0	0	0	0	0	0	0	0	0	0	0	0	0	162	0	0	0	0	0	0	0	0	9
551822	0	0	0	0	0	0	9	0	6	0	0	0	0	0	3	3	0	0	0	0	4	4	0	0	5	0	0	21	4	8	4	12	6	0	0	0	0	4	0	24	0	0	34	0	0	77	0	0	0
850642	0	0	0	0	0	5	0	0	0	0	0	0	0	0	0	0	0	0	0	0	0	0	3	0	0	0	0	4	0	0	0	31	8	0	0	4	0	0	0	0	0	0	0	0	0	51	0	0	0
535955	0	0	0	0	0	0	0	0	0	0	0	0	0	0	0	0	0	0	0	0	0	0	0	0	0	0	0	35	0	0	0	24	9	0	3	0	0	0	0	0	0	0	0	0	0	100	0	6	0
130402	0	3	0	0	0	0	0	0	0	0	0	0	0	0	0	0	0	0	0	0	0	0	0	0	0	0	0	69	0	0	0	31	0	0	0	0	0	0	0	0	0	0	0	0	0	172	0	0	4
564581	0	0	0	0	0	0	3	0	3	0	0	0	0	7	20	9	0	0	0	0	13	6	0	5	7	0	0	0	0	5	0	11	0	5	0	3	4	0	0	0	0	0	0	0	0	0	0	0	0
4380137	0	0	0	0	0	0	0	0	3	0	0	0	0	0	0	8	0	0	0	0	14	0	0	0	3	0	0	7	0	3	3	7	0	0	0	0	0	0	0	0	0	0	7	0	0	8	0	3	0
New.ReferenceOTU745	0	0	0	0	0	4	0	0	17	0	0	0	0	0	4	14	0	6	0	0	14	0	0	0	0	0	0	5	0	14	6	19	10	3	0	3	0	0	0	0	0	0	10	0	0	0	0	0	0
New.CleanUp.ReferenceOTU191597	0	0	0	0	0	0	4	9	0	0	3	0	0	0	0	33	0	19	0	0	0	13	0	0	0	0	5	0	3	18	0	3	0	0	6	0	0	0	0	0	0	0	0	0	0	0	0	0	0
287570	0	0	0	0	0	4	0	0	7	0	0	0	0	0	0	0	0	0	0	0	0	0	0	0	0	0	0	10	0	0	0	11	4	0	0	5	0	0	0	0	0	0	0	0	0	31	0	0	0
2051184	0	0	0	0	0	0	0	0	0	0	0	0	0	0	0	0	0	0	0	0	0	0	0	0	6	0	0	0	0	0	0	0	0	0	0	0	0	0	0	0	0	0	0	0	0	0	0	0	0
574528	0	0	0	0	0	0	0	0	0	0	0	0	0	0	0	0	0	0	0	0	0	0	0	0	0	0	0	7	0	0	0	0	0	0	0	0	0	0	0	0	0	0	0	0	0	40	0	0	0
New.CleanUp.ReferenceOTU30770	0	0	0	0	0	0	0	0	0	0	0	0	0	0	0	0	0	0	0	0	0	0	0	0	0	0	0	0	0	0	0	0	0	0	0	0	0	0	0	0	0	0	0	0	0	0	0	0	0
259212	0	0	0	0	0	0	0	0	0	0	0	0	0	0	0	0	0	0	0	0	0	0	0	0	0	0	0	5	0	3	0	0	0	4	0	0	0	0	0	0	0	0	0	0	0	45	0	0	0
180516	0	0	0	0	0	0	0	0	4	0	0	0	0	0	0	4	0	0	0	0	0	3	0	0	0	0	0	0	0	0	0	4	0	0	0	0	0	0	0	0	0	0	0	0	0	0	0	0	0
New.CleanUp.ReferenceOTU136444	0	0	0	0	0	0	0	0	0	0	0	0	0	0	0	0	0	0	0	0	0	0	0	0	0	0	0	0	0	0	0	0	0	0	0	0	0	0	0	0	0	0	0	0	0	0	0	0	0
1673703	0	0	0	0	0	0	0	0	0	0	0	0	0	0	0	0	0	0	0	0	0	0	0	0	0	0	0	0	0	0	0	0	0	0	0	0	0	0	0	0	0	0	0	0	0	9	0	0	0
New.CleanUp.ReferenceOTU358997	0	0	0	0	0	0	0	0	0	0	0	0	0	0	0	0	0	0	0	0	0	0	0	0	0	0	0	0	0	0	0	0	0	0	0	0	0	0	0	0	0	0	0	0	0	0	0	0	0
New.CleanUp.ReferenceOTU20916	0	0	0	0	0	0	0	0	0	0	0	0	0	3	0	0	0	0	0	0	6	0	0	0	0	0	0	0	0	3	0	5	0	0	0	0	0	0	0	0	0	0	0	0	0	0	0	0	0
New.ReferenceOTU865	0	0	0	0	0	0	0	0	0	0	0	0	0	0	0	0	0	0	0	0	0	0	0	0	0	0	0	0	0	0	0	3	0	0	0	0	0	0	0	0	0	0	0	0	0	5	0	0	0
308309	0	0	0	0	0	0	0	0	0	0	0	0	0	0	0	0	0	0	0	0	0	0	0	0	0	0	0	0	0	0	0	0	0	0	0	0	0	0	0	0	0	0	0	0	0	0	0	0	0
New.CleanUp.ReferenceOTU111348	0	0	0	0	0	0	0	0	0	0	0	0	0	0	0	0	3	0	19	0	0	0	0	0	9	0	0	0	0	0	0	0	0	0	0	0	0	0	0	0	0	0	0	0	0	0	0	0	0
New.CleanUp.ReferenceOTU19268	0	0	0	0	0	0	0	0	0	0	0	0	0	0	0	0	0	0	0	0	0	0	0	0	0	0	0	0	0	0	0	0	0	0	0	0	0	0	0	0	0	0	0	0	0	0	0	0	0
New.CleanUp.ReferenceOTU216422	0	0	0	0	0	0	0	0	0	0	0	0	0	0	0	0	0	0	0	35	0	0	0	0	0	0	0	0	0	0	0	0	0	0	0	0	0	0	0	0	0	0	0	0	0	0	0	0	0
New.ReferenceOTU457	334	55	0	0	6	27	68	4	36	52	11	10	45	969	114	0	0	0	400	12	0	35	6	67	658	31	4	0	0	31	66	76	6	13	28	14	19	38	0	189	0	14	0	0	65	0	4	207	804
290645	209	30	0	3	3	18	40	0	0	20	0	0	17	275	0	0	0	0	251	4	0	9	0	11	336	0	0	0	0	5	37	31	0	0	5	0	0	0	0	76	0	5	0	0	23	0	0	123	439
New.ReferenceOTU894	0	0	0	0	0	0	0	0	0	0	0	0	0	0	916	0	0	0	0	0	0	0	596	0	0	4	0	0	0	0	0	0	0	0	0	0	2357	0	0	0	0	0	0	0	0	0	0	0	0
New.ReferenceOTU683	0	6	7	0	0	0	0	0	0	0	0	0	0	0	0	0	0	0	0	0	0	10	0	0	0	0	0	0	0	0	0	0	0	0	0	0	0	0	0	0	0	0	0	0	8	0	0	0	6
New.CleanUp.ReferenceOTU102049	20	0	7	0	0	0	0	4	41	0	9	0	0	13	0	80	0	35	0	0	0	12	0	0	8	0	0	0	0	0	5	24	0	0	3	0	0	0	0	0	0	0	0	0	0	0	0	0	5
332430	5	5	0	0	4	0	0	0	17	3	7	0	0	4	22	9	0	0	5	0	0	4	0	0	17	10	0	0	0	3	0	0	0	5	0	0	8	13	0	12	0	0	0	0	0	0	3	0	8
New.CleanUp.ReferenceOTU261067	0	0	0	0	0	0	0	0	0	0	0	0	0	0	0	0	0	0	0	197	0	0	0	0	0	0	0	0	0	0	0	0	0	0	0	0	0	0	0	0	0	0	0	0	0	0	0	0	0
New.ReferenceOTU211	0	0	0	0	0	0	0	0	0	0	0	0	0	0	0	0	0	0	0	0	0	0	0	0	0	0	0	0	0	0	0	0	0	0	0	0	0	0	0	0	0	0	0	0	0	0	0	0	0
New.CleanUp.ReferenceOTU234818	0	0	0	0	0	0	0	0	0	4	0	0	0	257	0	0	0	0	0	6	0	0	0	0	8	0	0	0	0	0	0	0	0	0	0	0	0	0	0	0	0	0	0	0	0	0	0	0	0
New.CleanUp.ReferenceOTU151152	0	0	0	0	0	0	0	0	0	0	0	0	0	0	0	0	0	0	0	0	0	0	0	0	27	0	0	0	0	0	0	0	0	0	0	0	0	0	0	0	0	0	0	0	0	0	0	0	0
New.CleanUp.ReferenceOTU335291	0	0	0	0	0	0	0	0	0	0	0	0	0	0	0	0	0	0	0	230	0	0	0	0	0	0	0	0	0	0	0	0	0	0	0	0	0	0	0	0	0	0	0	0	0	0	0	0	0
New.CleanUp.ReferenceOTU357644	0	0	0	0	0	0	0	0	0	0	0	0	0	65	119	0	0	0	0	9	0	0	0	0	0	0	0	0	0	0	0	0	0	0	0	4	0	0	0	0	0	0	0	0	0	0	0	0	0
New.ReferenceOTU240	0	0	0	0	3	0	0	0	0	16	0	0	3	98	0	0	3	0	0	0	0	0	0	0	4	0	0	0	0	0	0	0	0	10	3	0	0	14	0	0	0	0	0	0	0	0	0	0	0
New.CleanUp.ReferenceOTU200377	0	0	0	0	4	0	0	0	0	7	0	0	3	0	140	0	0	0	0	25	0	0	0	0	0	0	0	0	3	0	0	0	0	0	0	0	0	5	0	0	0	0	0	0	0	0	0	0	0
New.CleanUp.ReferenceOTU169650	0	0	0	0	0	0	0	0	0	0	0	0	0	0	0	0	0	0	0	0	0	0	0	0	0	0	0	0	0	0	0	0	0	0	0	0	0	0	0	0	0	0	0	0	0	0	0	0	0
New.CleanUp.ReferenceOTU144652	0	0	0	0	0	0	0	0	0	0	0	0	0	0	0	0	0	0	0	0	0	0	0	0	0	0	0	0	0	0	0	0	0	0	0	0	0	0	0	0	0	0	0	0	0	0	0	0	0
New.CleanUp.ReferenceOTU84341	0	0	0	0	0	0	0	0	0	0	0	0	0	0	0	0	0	0	0	0	0	3	0	0	0	0	0	0	0	0	0	0	0	0	0	0	0	0	0	0	0	0	0	0	0	0	0	0	0
New.CleanUp.ReferenceOTU184574	0	0	0	0	0	0	0	0	0	0	0	0	0	0	0	0	0	0	0	0	0	0	0	0	0	0	0	0	0	0	0	0	0	0	0	0	0	0	0	0	0	0	0	0	0	0	0	0	0
New.CleanUp.ReferenceOTU353925	0	0	0	0	0	0	0	0	0	0	0	0	0	147	0	0	0	0	0	0	0	0	0	0	0	0	0	0	0	0	0	0	0	0	0	0	0	0	0	0	0	0	0	0	0	0	0	0	0
539296	0	8	0	0	0	0	0	0	0	0	0	0	0	0	0	0	0	0	0	0	0	5	0	0	0	9	0	0	0	0	0	0	0	0	0	0	3	0	0	0	0	0	0	0	0	0	0	0	0
New.CleanUp.ReferenceOTU191923	0	0	0	0	0	0	0	0	0	0	0	0	0	0	0	0	0	0	0	0	0	0	0	0	0	0	0	0	0	0	0	0	0	0	0	0	0	0	0	0	0	0	0	0	0	0	0	0	0
826749	0	0	0	0	0	0	0	0	0	0	0	0	0	0	0	0	0	0	0	0	0	0	0	0	0	0	0	0	0	0	0	0	0	0	0	0	0	0	0	0	0	0	0	0	0	0	0	0	0
New.CleanUp.ReferenceOTU271845	0	3	0	0	0	0	0	0	0	12	0	3	4	0	0	0	0	0	0	0	0	0	0	0	0	14	0	0	0	0	0	0	0	3	0	5	3	0	0	0	0	0	0	0	0	0	0	0	0
New.CleanUp.ReferenceOTU144520	0	0	0	0	5	0	0	0	0	9	3	5	5	0	0	0	0	0	0	0	0	7	0	0	13	0	0	0	0	4	3	0	0	14	0	0	0	15	0	0	0	0	0	0	0	0	5	0	0
New.CleanUp.ReferenceOTU204839	0	0	0	0	0	0	0	0	0	0	0	0	0	0	0	0	0	0	0	0	0	0	0	0	0	0	0	0	0	0	0	0	0	0	0	0	0	0	0	0	0	0	0	0	0	0	0	0	0
New.CleanUp.ReferenceOTU75431	0	0	0	0	0	0	0	0	0	0	0	0	0	0	0	0	0	0	0	0	0	0	0	0	0	0	0	0	0	0	0	10	0	0	8	0	0	0	0	0	0	0	0	0	0	0	0	0	0
347042	0	0	0	0	0	0	0	0	0	4	0	0	0	0	0	67	0	0	0	0	0	0	0	0	0	0	0	0	0	0	0	0	0	0	0	0	0	4	0	0	0	0	0	0	0	0	0	0	0
591475	0	0	0	0	0	0	0	0	0	0	0	0	0	0	0	0	0	0	0	0	0	0	0	0	0	0	0	0	0	0	0	0	0	0	0	0	0	0	0	0	0	0	0	0	0	0	0	0	0
New.CleanUp.ReferenceOTU237099	0	0	0	0	0	0	0	0	0	5	0	4	13	0	0	0	0	0	0	3	0	11	0	0	14	0	0	0	0	0	0	0	0	0	0	0	3	15	0	0	0	0	0	0	0	0	0	0	0
New.ReferenceOTU871	24	8	5	0	0	0	6	0	0	14	16	5	0	0	0	0	0	0	0	0	0	43	0	0	6	0	0	0	0	25	0	83	0	0	3	0	6	5	0	0	5	0	0	0	46	0	0	15	6
New.ReferenceOTU499	0	0	3	0	0	0	0	0	0	11	0	0	0	0	0	3	0	0	0	0	0	10	0	0	0	0	0	0	0	0	0	4	0	4	4	0	0	10	0	0	0	0	0	0	41	0	7	4	8
New.CleanUp.ReferenceOTU222695	0	0	0	0	0	0	0	0	0	22	0	3	7	0	0	0	0	0	47	8	0	0	0	0	0	0	0	0	0	0	0	0	0	0	0	0	5	5	0	27	0	0	0	0	0	0	0	0	0
308136	0	0	0	0	3	0	0	0	0	28	0	3	10	0	0	0	0	0	0	3	0	0	0	0	8	0	0	0	3	0	0	0	0	0	0	0	5	3	0	0	0	0	0	0	0	0	0	0	0
New.CleanUp.ReferenceOTU114169	0	0	0	0	0	0	0	0	0	0	0	0	0	54	0	0	0	0	0	11	0	0	0	0	0	0	0	0	0	0	0	0	0	0	0	0	0	0	0	0	0	0	0	0	0	0	0	0	0
New.CleanUp.ReferenceOTU322889	0	0	0	0	0	0	0	7	136	7	29	0	0	0	0	19	0	15	0	10	0	104	3	22	20	0	9	0	0	130	11	5	0	139	0	0	0	0	4	0	0	0	0	0	0	0	15	0	0
704264	0	0	0	0	0	0	0	0	224	14	0	0	0	0	0	0	0	0	0	8	0	11	0	0	0	0	0	0	0	18	0	0	0	68	0	0	0	0	0	0	0	0	0	0	0	0	0	0	0
New.CleanUp.ReferenceOTU234237	0	0	0	0	0	0	0	0	0	0	0	0	0	0	0	0	0	0	0	10	0	0	0	0	14	0	0	0	0	0	0	0	0	16	0	0	0	0	0	0	0	0	0	0	0	0	0	0	0
523140	0	0	0	0	0	0	0	0	0	0	0	0	0	0	0	0	0	0	0	0	0	0	0	0	0	0	0	0	0	0	0	0	0	0	0	0	0	0	0	0	0	0	0	0	0	0	0	0	0
New.CleanUp.ReferenceOTU340594	0	0	0	0	0	0	0	0	55	0	0	0	0	0	0	0	0	0	0	0	0	0	0	0	0	0	0	0	0	4	0	0	0	12	0	0	0	0	0	0	0	0	0	0	0	0	0	0	0
564026	0	0	0	0	0	0	0	0	0	0	0	0	0	0	0	0	0	0	0	0	0	0	0	0	0	0	0	0	0	0	0	0	0	0	0	0	0	0	0	0	0	0	0	0	0	0	0	0	0
New.ReferenceOTU98	0	0	0	0	0	0	0	0	0	0	0	0	0	52	0	0	0	0	0	0	0	4	0	0	0	0	0	0	0	0	0	0	0	0	0	0	0	0	0	0	0	0	0	0	0	0	0	0	0
559728	0	0	0	0	0	0	0	0	0	0	0	0	0	0	0	0	0	0	0	0	0	0	0	0	0	0	0	0	0	0	0	0	0	0	0	0	0	0	0	0	0	0	0	0	0	0	0	0	0
41951	0	0	0	0	0	0	0	0	0	0	0	0	0	0	0	0	0	0	0	0	0	0	0	0	0	0	0	0	0	0	0	0	0	0	0	0	0	0	0	172	0	0	0	0	0	0	0	0	0
586356	0	26	0	0	11	0	0	3	25	169	0	21	30	82	1001	0	3	0	0	13	0	0	9	0	79	47	0	44	18	7	0	3	0	55	71	3	31	25	0	60	3	5	0	0	12	0	9	4	0
New.ReferenceOTU839	0	7	0	0	5	0	0	0	4	29	0	9	4	19	174	0	0	0	0	5	0	0	0	0	19	14	0	11	3	3	0	0	0	15	21	0	10	5	0	21	0	0	0	0	0	0	0	0	0
New.CleanUp.ReferenceOTU313334	0	0	0	0	0	0	0	0	0	0	0	0	0	0	0	0	0	0	0	0	0	0	0	0	0	0	0	0	0	0	0	0	0	0	0	0	0	0	0	0	0	0	0	0	0	0	0	0	0
250414	0	0	0	0	0	0	0	0	0	0	0	0	0	0	0	0	0	0	0	85	0	0	0	0	0	0	0	0	0	0	0	0	0	0	0	0	0	0	0	0	0	0	0	0	0	0	0	0	0
New.CleanUp.ReferenceOTU203599	0	0	0	0	0	0	0	0	0	0	0	0	0	0	0	0	0	0	0	0	0	0	0	0	0	0	0	0	0	0	0	0	0	0	0	0	0	0	0	0	0	0	0	0	0	0	0	0	0
4307974	0	0	0	0	0	0	0	0	0	0	0	0	0	0	0	0	0	0	0	0	0	0	0	0	0	0	0	0	0	0	0	0	0	0	0	0	0	0	0	0	0	0	0	0	0	0	0	0	0
New.ReferenceOTU474	0	0	0	0	0	0	0	0	18	75	0	0	12	306	306	0	0	0	0	3	0	6	0	0	0	20	0	82	0	8	0	13	0	8	21	3	23	6	0	52	0	0	0	0	0	0	0	0	0
New.ReferenceOTU1102	0	0	0	0	0	0	0	0	0	0	0	0	0	0	0	0	0	0	0	0	0	0	0	0	0	0	0	0	0	0	0	0	0	0	0	0	0	0	0	0	0	0	0	0	0	0	0	0	0
2273344	0	0	0	0	0	0	0	0	0	0	0	0	0	0	0	0	0	0	0	0	0	0	0	0	0	0	0	0	0	0	0	0	0	0	0	0	0	0	0	0	0	0	0	0	0	0	0	0	0
541782	0	0	0	0	0	0	0	0	0	0	0	0	0	0	0	0	0	0	0	0	0	0	0	0	0	0	0	0	0	0	0	0	0	0	0	0	0	0	0	0	0	0	0	0	0	0	0	0	0
565822	0	0	0	0	0	0	0	0	0	0	0	0	0	0	0	0	0	0	0	0	0	0	0	0	0	0	0	0	0	0	0	0	0	0	0	0	0	0	0	0	0	0	0	0	0	0	0	0	0
1122582	23	2767	0	0	56	252	0	0	0	13	0	29	184	650	9375	0	21	0	5966	101	0	0	13	0	0	755	0	0	81	0	0	0	0	22	186	163	164	348	0	65	0	0	0	0	3	0	0	0	4
New.ReferenceOTU933	3	522	0	0	10	56	0	0	0	4	0	6	21	124	1721	0	3	0	1020	17	0	0	0	0	0	157	0	0	14	0	0	0	0	0	32	27	42	73	0	11	0	0	0	0	0	0	0	0	0
New.ReferenceOTU1129	0	538	0	0	12	55	0	0	0	0	0	9	41	146	1745	0	13	0	1050	20	0	0	0	0	0	158	0	0	26	0	0	0	0	3	41	34	41	81	0	18	0	0	0	0	0	0	0	0	0
New.ReferenceOTU886	0	0	0	0	0	0	0	0	0	0	0	0	0	166	0	0	0	0	0	0	0	4	0	0	47	0	0	0	0	0	11	0	0	0	0	0	0	0	0	0	0	0	0	0	0	0	0	0	0
New.ReferenceOTU796	0	0	0	0	0	0	0	0	0	0	0	0	0	0	0	0	0	0	0	0	0	0	0	0	0	0	0	0	0	0	0	0	0	0	0	0	0	0	0	0	0	0	0	0	0	0	0	0	0
583286	0	9	0	0	0	0	0	0	0	0	0	0	0	0	18	0	0	0	8	0	0	0	0	0	0	0	0	0	0	0	0	0	0	0	0	0	0	0	0	0	0	0	0	0	0	0	0	0	0
New.CleanUp.ReferenceOTU4360	0	0	0	0	0	0	0	0	0	0	0	0	0	0	0	0	0	0	0	0	0	0	0	0	0	0	0	0	0	0	0	0	0	0	0	0	0	0	0	0	0	0	0	0	0	0	0	0	0
New.CleanUp.ReferenceOTU357507	0	0	0	0	0	0	0	0	0	0	0	0	0	61	0	0	0	0	0	0	0	0	0	0	0	0	0	0	0	0	0	0	0	0	0	0	0	0	0	0	0	0	0	0	0	0	0	0	0
624542	0	0	0	0	0	0	0	0	0	0	0	0	0	0	0	0	0	0	0	0	0	0	0	0	0	0	0	0	0	0	0	0	0	0	0	0	0	0	0	0	0	0	0	0	0	0	0	0	0
New.ReferenceOTU1010	0	10	9	0	56	0	0	43	170	299	33	39	50	435	1400	26	3	62	0	13	40	65	40	0	28	64	10	58	60	51	7	52	127	235	247	8	46	141	0	95	55	34	2365	0	17	0	25	15	3
New.ReferenceOTU1120	0	0	0	0	0	0	0	0	0	0	0	0	0	0	0	0	0	0	0	92	0	0	0	0	0	0	0	0	0	0	0	0	0	0	0	0	0	0	0	0	0	0	0	0	0	0	0	0	0
1658350	0	0	0	0	0	0	0	0	0	5	0	0	0	0	0	0	0	34	0	5	0	0	0	0	0	0	0	0	0	0	0	0	0	0	0	0	0	0	0	46	0	0	0	0	0	0	0	0	0
New.CleanUp.ReferenceOTU218498	0	0	0	0	0	0	0	0	0	0	0	0	0	0	0	0	0	0	0	0	0	0	0	0	0	0	0	0	0	0	0	0	0	0	0	0	0	0	0	0	0	0	0	0	0	0	0	0	0
828162	33919	38759	15886	41	36884	23133	37132	4867	10667	15537	5074	30349	23055	27524	8965	13498	16096	8428	21188	8903	8825	17028	23754	6907	35507	8663	23610	17184	21911	8019	12800	11091	2936	14227	19768	28216	17631	10924	19342	5376	9087	9157	11600	18605	18590	14388	7345	7253	6654
297672	106	4057	46	0	490	2514	81	103	487	3457	520	975	2329	444	879	555	540	247	846	51	1886	430	2360	940	4959	246	362	448	739	227	1316	2065	3295	1176	2890	1945	1773	164	95	60	469	523	23	46	1837	170	111	5411	657
New.ReferenceOTU1058	16	1799	4	0	218	1186	0	38	245	1676	224	415	1137	214	295	222	274	110	280	15	744	163	1012	399	2143	96	196	216	354	94	629	949	1492	502	1417	884	819	66	31	20	247	282	0	0	820	63	34	2564	306
593625	461	93	218	0	52	70	532	27	64	34	50	49	63	275	51	74	64	33	114	119	113	208	74	41	232	70	301	86	45	35	64	17	6	13	32	92	57	29	245	28	114	15	50	244	44	11	18	13	24
11302	3	7	156	0	0	0	4	0	0	0	13	0	0	0	0	0	3	0	0	0	0	0	4	0	0	21	5	0	0	0	0	0	0	10	0	0	3	3	0	0	0	625	0	0	16	0	0	0	0
834829	143	146	66	0	137	101	152	20	39	73	21	124	143	105	31	42	55	37	87	37	37	64	90	65	143	28	84	106	89	32	51	67	11	63	94	113	79	41	59	24	35	45	41	75	101	171	24	34	40
171460	85	130	51	0	113	84	123	13	32	49	14	96	84	101	26	41	62	29	56	24	26	50	75	27	120	22	65	65	88	32	44	46	11	48	71	79	59	40	52	20	25	42	21	52	58	42	28	31	23
1141330	0	0	0	0	0	0	0	0	0	0	0	0	0	0	0	0	0	0	0	0	0	0	0	0	0	0	0	0	0	0	0	0	0	0	0	0	0	0	0	0	0	0	0	0	0	0	0	0	0
4435370	0	16	0	0	454	134	0	4	0	66	0	72	17	0	0	5	189	4	37	0	0	0	46	0	37	0	4	0	349	86	3	0	601	37	0	12	0	200	0	276	0	0	0	0	0	0	0	0	0
293351	0	113	0	0	53	0	0	0	0	54	18	113	226	0	0	20	58	5	0	6	0	16	104	0	55	5	27	0	102	8	4	7	8	10	119	44	58	11	4	7	28	27	0	0	54	0	7	124	26
828027	55	48	20	0	32	17	169	3	18	15	4	33	22	32	6	12	17	5	17	9	15	41	28	5	40	7	23	23	21	5	10	15	0	24	15	39	13	15	21	11	11	9	9	14	19	23	6	3	7
812693	75	34	15	0	20	12	45	3	8	12	13	17	14	24	0	14	10	10	15	10	8	17	23	0	34	9	35	8	12	7	43	8	0	11	13	21	16	8	10	0	13	6	6	20	17	7	7	4	5
New.ReferenceOTU57	0	46	0	0	3	37	0	0	8	46	10	4	20	8	11	9	4	5	15	0	12	5	37	7	53	0	4	6	15	0	9	27	32	21	30	21	19	0	0	0	7	5	0	0	15	7	0	59	6
351979	0	41	0	0	4	25	0	0	5	23	0	3	16	4	0	7	5	4	4	0	15	0	13	4	29	3	5	0	0	4	12	8	23	14	29	19	10	0	0	0	5	6	0	0	11	0	0	45	4
New.ReferenceOTU732	0	0	9	0	0	0	0	0	0	0	0	0	0	0	0	0	0	0	0	0	0	0	0	0	0	0	0	0	0	0	0	0	0	0	0	0	0	0	0	0	0	31	0	0	0	0	0	0	0
New.ReferenceOTU553	0	0	0	0	0	0	0	0	0	0	0	0	0	0	0	0	0	0	0	0	0	0	0	0	0	0	0	0	0	0	0	0	0	0	0	0	0	0	0	0	0	0	0	0	0	0	0	0	0
New.ReferenceOTU109	4	0	5	0	11	6	5	0	0	7	0	6	4	3	3	0	0	3	4	0	0	4	5	0	6	0	3	0	5	3	3	0	8	0	3	6	3	4	0	5	3	0	0	3	0	0	3	0	0
287660	5	4	3	0	6	0	0	0	0	0	0	3	5	5	0	0	4	0	3	0	0	0	3	0	10	0	0	0	10	0	0	0	3	0	0	4	0	0	0	0	0	0	0	0	0	0	0	3	0
838467	0	0	0	0	0	0	0	0	0	0	0	4	0	3	0	0	0	0	0	0	0	6	0	0	6	0	0	0	0	0	0	0	0	0	0	4	0	0	0	0	0	0	0	0	0	0	0	0	0
New.CleanUp.ReferenceOTU319591	0	0	0	0	0	0	0	0	0	0	5	6	4	0	0	0	10	0	0	0	0	0	0	0	0	0	5	0	3	0	0	0	0	0	0	0	0	0	0	0	4	4	0	0	0	0	0	19	3
820475	0	6	0	0	0	0	0	0	0	0	0	0	0	0	0	0	0	0	0	0	0	0	0	0	4	0	0	0	0	0	0	0	5	0	0	3	0	0	0	0	0	0	0	0	5	0	0	7	0
New.ReferenceOTU12	0	0	0	0	0	0	0	0	0	0	0	0	0	0	0	0	0	0	0	0	0	0	0	0	0	0	0	0	0	0	0	0	0	0	0	0	0	0	0	0	0	0	0	0	0	0	0	0	0
New.CleanUp.ReferenceOTU144561	0	0	0	0	0	0	0	0	0	0	0	0	0	0	0	0	0	0	0	0	0	0	0	0	0	0	0	0	0	0	0	0	0	0	0	0	0	0	0	0	0	0	0	0	0	0	0	0	0
298592	0	53	0	0	8	27	0	0	8	47	8	13	32	9	12	9	12	5	8	0	16	5	39	15	57	4	5	6	0	0	20	19	41	11	39	26	15	6	0	0	3	6	0	0	22	3	0	72	11
New.CleanUp.ReferenceOTU27094	0	0	0	0	0	0	0	0	0	0	0	0	0	0	0	0	0	0	0	0	0	0	0	0	0	0	0	0	0	0	0	0	0	0	0	0	0	0	0	0	0	0	0	0	0	0	0	3	0
New.CleanUp.ReferenceOTU133887	0	0	0	0	0	0	0	0	0	0	7	4	8	0	0	0	10	0	0	0	0	0	3	0	0	0	0	0	0	0	0	0	0	0	0	0	0	0	0	0	0	0	0	0	0	0	0	15	0
532752	0	0	0	0	0	0	0	0	0	0	0	0	0	0	0	0	0	0	0	0	0	0	0	0	0	0	0	0	0	0	0	0	0	0	0	0	0	0	0	0	0	0	0	0	0	0	0	0	0
811642	0	0	0	0	0	0	0	0	0	0	0	0	0	0	0	0	0	0	0	0	0	0	0	0	0	0	0	0	0	0	0	0	0	0	0	0	0	0	0	0	0	0	0	0	0	0	0	0	0
New.CleanUp.ReferenceOTU175911	0	0	0	0	0	0	0	0	0	0	0	0	0	0	0	0	0	0	0	0	0	0	0	0	0	0	0	0	0	0	0	0	0	0	0	0	0	0	0	0	0	0	0	0	0	0	0	0	0
1019724	0	0	0	0	0	0	0	0	0	0	0	0	0	0	0	0	0	0	0	0	0	0	0	0	0	0	0	0	0	0	0	0	0	0	0	0	0	0	0	0	0	0	0	0	0	0	0	0	0
647919	0	0	0	0	0	0	0	0	0	0	0	0	0	0	0	0	0	0	0	0	0	0	0	0	0	0	0	0	0	0	0	0	0	0	0	0	0	0	0	0	0	0	0	0	0	0	0	0	0
204108	0	0	0	0	0	0	0	0	0	0	0	0	0	0	0	0	0	0	0	0	0	0	0	0	0	0	0	0	0	0	0	0	0	0	0	0	0	0	0	0	0	0	0	0	0	0	0	0	0
810855	0	0	0	0	0	0	0	0	0	0	0	0	0	0	0	0	0	0	0	0	0	0	0	0	0	0	0	0	0	0	0	0	0	0	0	0	0	0	0	0	0	0	0	0	0	0	0	0	0
New.ReferenceOTU1037	5	296	0	0	213	0	0	12	45	1936	0	36	166	0	1962	0	35	3	95	39	0	0	226	46	15	8	0	51	296	0	0	0	0	217	124	35	52	78	0	421	9	0	0	0	3	0	5	4	0
New.ReferenceOTU921	0	0	0	0	0	0	0	0	0	0	0	0	0	0	0	0	0	0	0	0	0	0	0	0	0	0	0	0	0	0	0	0	0	0	0	0	0	0	0	0	0	0	0	0	0	0	0	0	0
New.CleanUp.ReferenceOTU64502	0	0	0	0	9	0	0	0	0	7	0	0	11	0	0	0	3	0	0	0	0	0	0	0	0	0	0	0	6	0	0	0	0	0	0	0	0	3	0	0	0	0	0	0	0	0	0	0	0
New.CleanUp.ReferenceOTU292886	0	0	0	0	0	0	0	0	0	0	0	0	0	0	0	0	0	0	0	0	0	0	0	0	0	0	0	0	0	0	0	0	0	0	0	0	0	0	0	0	0	0	0	0	0	0	0	0	0
New.CleanUp.ReferenceOTU354369	0	0	0	0	0	0	0	0	0	0	0	0	0	0	0	0	0	0	0	0	0	0	0	0	0	0	0	0	0	0	0	0	0	0	0	0	0	0	0	0	0	0	0	0	0	0	0	0	0
263398	0	0	0	0	0	0	0	0	0	0	0	0	0	0	0	0	0	0	0	0	0	0	0	0	0	0	0	0	0	0	0	0	0	0	0	0	0	0	0	0	0	0	0	0	0	0	0	0	0
109789	0	0	0	0	0	0	0	0	0	0	0	0	0	0	0	0	0	0	0	0	0	0	0	0	0	0	0	0	0	0	0	0	0	0	0	0	0	0	0	0	0	0	0	0	0	0	0	0	0
New.CleanUp.ReferenceOTU70037	0	0	0	0	0	0	0	0	0	0	0	0	0	0	0	0	0	0	0	0	0	0	0	0	0	0	0	0	0	0	0	0	0	0	0	0	0	0	0	0	0	0	0	0	0	0	0	0	0
882422	0	0	0	0	0	0	0	0	0	0	0	0	0	0	0	0	0	0	0	0	0	0	0	0	0	0	0	0	0	0	0	0	0	0	0	0	0	0	0	0	0	0	0	0	0	0	0	0	0
609315	0	0	0	0	0	0	0	0	0	0	0	0	0	0	0	0	0	0	0	0	0	0	0	0	0	0	0	0	0	0	0	0	0	0	0	0	0	0	0	0	0	0	0	0	0	0	0	0	0
545791	0	0	0	0	0	0	0	0	0	0	0	0	0	0	0	0	0	0	0	0	0	0	0	0	0	0	0	0	0	0	0	0	8	0	0	0	0	0	0	0	0	0	0	0	0	0	0	0	0
New.ReferenceOTU602	0	0	0	0	0	0	0	0	0	0	0	0	0	0	0	0	0	0	0	0	0	0	0	0	0	0	0	0	0	0	0	0	0	0	0	0	0	0	0	0	0	0	0	0	0	0	0	0	0
New.CleanUp.ReferenceOTU240174	0	0	0	0	0	0	0	0	0	0	0	0	0	0	0	0	0	0	0	0	0	0	0	0	0	0	0	0	0	0	0	0	0	0	0	0	0	0	0	0	0	0	0	0	0	0	0	0	0
New.ReferenceOTU813	0	0	0	0	0	0	0	0	0	0	0	0	0	0	0	0	0	0	0	0	0	0	0	0	0	0	0	0	0	0	0	0	0	0	0	0	0	0	0	0	0	0	0	0	0	0	0	0	0
New.CleanUp.ReferenceOTU202670	0	0	0	0	0	0	0	0	0	0	0	0	0	0	0	0	0	0	0	0	0	0	0	0	0	0	0	0	0	0	0	0	6	0	0	0	0	0	0	0	0	0	0	0	0	0	0	0	0
New.CleanUp.ReferenceOTU186573	0	0	0	0	0	0	0	0	0	0	0	0	0	0	0	0	0	0	0	0	0	0	0	0	0	0	0	0	0	0	0	0	0	0	0	0	0	0	0	0	0	0	0	0	0	0	0	0	0
4457249	0	0	0	0	0	0	0	0	0	0	0	0	0	0	0	0	0	0	0	0	0	0	0	0	0	0	0	0	0	0	0	0	0	0	0	0	0	0	0	0	0	0	0	0	0	0	0	0	0
New.CleanUp.ReferenceOTU213975	0	0	0	0	0	0	0	0	0	0	0	0	0	0	0	0	0	0	0	0	0	0	0	0	0	0	0	0	0	0	0	0	0	0	0	0	0	0	0	0	0	0	0	0	0	0	0	0	0
687345	0	0	0	0	0	0	0	0	0	0	0	0	0	0	0	0	0	0	30	0	0	0	0	0	0	0	0	107	0	0	0	0	0	0	4	4	0	0	0	0	0	0	0	0	0	0	0	0	0
New.CleanUp.ReferenceOTU124381	0	0	0	0	0	0	0	0	0	0	0	0	0	0	0	0	0	0	0	0	0	0	0	0	0	0	0	0	0	0	0	10	3	0	0	0	0	0	0	0	0	0	0	0	0	243	0	0	0
4178573	0	0	0	0	0	0	0	0	0	0	0	0	0	0	0	0	0	0	0	0	0	0	0	0	0	0	0	0	0	0	0	0	3	0	0	0	0	0	0	0	0	0	0	0	0	77	0	0	0
New.CleanUp.ReferenceOTU260980	0	0	0	0	0	0	0	0	0	0	0	0	0	0	0	0	0	0	0	0	0	0	0	0	0	0	0	0	0	0	0	0	0	0	0	0	0	0	0	0	0	0	0	0	0	0	0	0	0
819924	0	0	0	0	0	0	0	0	0	0	0	0	0	0	0	0	0	0	0	0	0	0	0	0	0	0	0	0	0	0	0	0	0	0	0	0	0	0	0	0	0	0	0	0	0	0	0	0	0
562115	0	0	0	0	0	0	0	0	0	0	0	0	0	0	0	0	0	0	0	0	0	0	0	0	0	0	0	0	0	0	0	0	0	0	0	0	0	0	0	0	0	0	0	0	0	0	0	0	0
New.ReferenceOTU684	0	0	0	0	0	0	0	0	0	0	0	0	0	0	0	0	0	0	0	0	0	0	0	0	0	0	0	0	0	0	0	10	6	0	0	0	0	0	0	0	0	3	0	0	0	0	0	0	0
New.CleanUp.ReferenceOTU249985	0	0	0	0	0	0	0	0	0	0	0	0	0	0	0	0	0	0	0	0	0	0	0	0	0	0	0	90	0	0	0	9	0	0	0	0	0	0	0	0	0	0	0	0	0	0	0	0	0
812500	0	0	0	0	0	0	0	0	0	0	0	0	0	0	0	0	0	0	0	0	0	0	0	0	0	0	0	0	0	0	0	0	0	0	0	0	0	0	0	0	0	0	0	0	0	0	0	0	0
New.ReferenceOTU1045	0	0	0	0	0	0	0	0	0	0	0	0	0	0	0	0	0	0	0	0	0	0	0	0	0	0	0	0	0	0	0	10	0	0	0	0	0	0	0	0	0	0	0	0	0	0	0	0	0
New.CleanUp.ReferenceOTU253288	0	0	0	0	0	0	0	0	0	0	0	0	0	0	0	0	0	0	0	0	0	0	0	0	0	0	0	0	0	0	0	7	0	0	0	0	0	0	0	0	0	0	0	0	0	0	0	0	0
New.CleanUp.ReferenceOTU54510	0	0	0	0	0	0	0	0	0	0	0	0	0	0	0	0	0	0	0	0	0	0	0	0	0	0	0	0	0	0	0	0	0	0	0	0	0	0	0	0	0	0	0	0	0	0	0	0	0
New.CleanUp.ReferenceOTU88173	0	0	0	0	0	0	0	0	0	0	0	0	0	0	0	0	0	0	0	0	0	0	0	0	0	0	0	0	0	0	0	0	0	0	0	0	0	0	0	0	0	0	0	0	0	0	0	0	0
New.CleanUp.ReferenceOTU210277	0	0	0	0	0	0	0	0	0	0	0	0	0	0	0	0	0	0	0	0	0	0	0	0	0	0	0	0	0	0	0	0	0	0	0	0	0	0	0	0	0	0	0	0	0	0	0	0	0
New.CleanUp.ReferenceOTU271449	0	0	0	0	0	0	0	0	0	0	0	0	0	0	0	0	0	4	0	0	0	0	0	0	3	0	0	0	0	0	0	3	0	0	0	0	0	0	0	0	0	0	0	0	4	0	0	7	0
4322206	0	0	0	0	0	0	0	0	0	0	0	0	0	0	0	0	0	0	0	0	0	0	0	0	0	0	0	0	0	0	0	0	0	0	0	0	0	0	0	0	0	0	0	0	0	0	0	0	0
New.CleanUp.ReferenceOTU85381	0	0	0	0	0	0	0	0	0	0	0	0	0	0	0	0	0	0	0	0	0	0	0	0	0	0	0	0	0	0	0	0	0	0	0	0	0	0	0	0	0	0	0	0	0	0	0	0	0
2064842	0	0	0	0	0	0	0	0	0	0	0	0	0	0	0	0	0	0	0	0	0	0	0	0	0	0	0	0	0	0	0	0	0	0	0	0	0	0	0	0	0	0	0	0	0	0	0	0	0
New.CleanUp.ReferenceOTU111153	0	0	0	0	0	0	0	0	0	0	0	0	0	0	0	0	0	0	0	0	0	0	0	0	0	0	0	102	0	0	0	0	7	0	0	0	0	0	0	0	0	0	0	0	0	0	0	5	0
4368880	0	0	0	0	0	0	0	0	0	0	0	0	0	0	0	0	0	0	0	0	0	0	0	0	0	0	0	0	0	0	0	12	0	0	0	0	0	0	0	0	0	0	0	0	0	0	0	3	0
New.CleanUp.ReferenceOTU76496	0	0	0	0	0	0	0	0	0	0	0	0	0	0	0	0	0	0	0	0	0	0	0	0	0	0	0	0	0	0	0	0	0	0	0	0	0	0	0	0	0	0	0	0	0	0	0	0	0
4363449	0	0	0	0	0	99	0	0	0	0	0	0	0	0	0	0	0	0	0	0	0	0	0	0	0	0	0	0	0	0	0	21	0	0	0	0	0	0	0	0	0	0	0	0	0	0	0	0	0
New.ReferenceOTU368	0	0	0	0	0	0	0	0	0	0	0	0	0	0	0	0	0	0	0	0	0	0	0	0	0	0	0	0	0	0	0	0	0	0	0	0	0	0	0	0	0	0	0	0	0	0	0	0	0
1645783	0	0	0	0	0	0	0	0	0	0	0	0	0	0	0	0	0	0	0	0	0	0	0	0	0	0	0	0	0	0	0	0	0	0	0	0	0	0	0	0	0	0	0	0	0	0	0	0	0
585030	0	16	6	0	4	0	0	0	0	5	0	7	0	0	0	0	9	0	0	0	0	0	0	0	0	0	0	0	5	0	0	4	0	0	5	5	0	0	0	0	7	5	0	0	3	0	0	35	0
341049	6	8	3	0	0	0	0	8	0	9	18	0	0	0	0	86	4	39	0	0	0	0	6	22	8	0	5	0	0	13	40	16	0	148	0	6	4	0	3	0	5	0	0	5	3	256	66	24	0
4414053	0	0	0	0	0	0	0	0	0	0	0	0	0	0	0	0	0	0	0	0	0	0	0	0	0	0	0	0	0	0	0	0	0	0	0	0	0	0	0	0	0	0	0	0	0	0	0	0	0
4437178	0	0	0	0	0	0	0	0	0	7	0	0	0	0	0	0	0	0	0	0	0	0	0	0	0	0	0	0	0	0	0	17	0	0	3	0	0	0	0	0	0	0	0	0	0	0	0	0	0
820255	0	9	0	0	5	29	0	0	0	24	0	3	3	0	0	0	9	0	0	0	0	0	0	0	0	0	0	0	5	0	0	0	13	0	0	5	0	0	0	0	0	0	0	0	0	0	0	0	0
637010	0	0	0	0	0	0	0	0	0	0	0	0	0	61	0	12	0	5	0	0	0	9	0	33	0	0	0	0	0	4	0	0	0	36	0	0	0	0	0	0	0	0	0	0	0	0	49	0	0
New.CleanUp.ReferenceOTU263403	0	0	0	0	0	0	0	0	0	11	0	0	0	0	0	0	0	0	0	0	0	0	0	0	0	3	0	0	4	0	0	8	70	3	6	0	0	0	0	0	0	3	0	0	0	0	0	19	4
New.ReferenceOTU16	0	0	0	0	0	0	0	0	0	0	0	0	0	0	0	0	0	0	0	0	0	0	0	0	0	0	0	0	0	0	0	0	0	0	0	0	0	0	0	0	0	0	0	0	0	0	0	0	0
544261	0	0	0	0	0	0	0	0	0	0	0	0	0	0	0	0	10	0	0	0	0	0	0	0	0	0	0	0	0	0	0	3	9	0	0	0	0	0	0	0	0	9	0	0	0	0	0	12	0
New.CleanUp.ReferenceOTU156823	0	4	0	0	7	36	0	0	0	5	0	0	0	57	0	0	5	0	0	0	0	0	9	0	0	0	0	0	3	0	0	6	30	0	4	6	0	0	0	0	3	3	0	0	0	0	0	6	0
New.CleanUp.ReferenceOTU218343	0	0	0	0	0	0	0	0	0	0	0	0	0	0	0	0	0	0	0	0	0	0	0	0	0	0	0	131	0	0	0	0	0	0	0	0	0	0	0	0	0	0	0	0	0	0	0	9	0
New.ReferenceOTU833	0	0	0	0	0	0	0	0	0	0	0	0	0	0	0	0	0	0	0	0	0	0	0	0	0	0	0	0	0	0	0	0	0	0	0	0	0	0	0	0	0	0	0	0	0	0	0	0	0
New.ReferenceOTU393	0	0	0	0	0	0	0	0	0	0	0	0	0	0	0	0	0	0	0	0	0	0	0	0	0	0	0	0	0	0	0	0	0	0	0	0	4	0	0	0	0	0	0	0	0	0	0	0	0
New.CleanUp.ReferenceOTU176687	0	4	0	0	0	0	0	0	0	4	0	0	0	0	0	0	0	0	0	0	0	0	0	0	0	0	0	76	0	0	0	7	7	0	0	3	6	0	0	0	0	0	0	0	0	0	0	12	0
New.CleanUp.ReferenceOTU269559	0	0	0	0	0	0	0	0	0	0	0	0	0	0	0	0	0	0	0	0	0	0	0	0	0	0	0	55	0	0	0	12	0	0	0	0	0	0	0	0	0	0	0	0	0	0	0	0	0
New.CleanUp.ReferenceOTU327549	0	0	0	0	0	0	0	0	0	0	0	0	0	0	0	0	0	0	0	0	0	0	0	0	0	0	0	0	0	0	0	0	8	0	0	0	0	0	0	0	0	0	0	0	0	0	0	0	0
New.ReferenceOTU996	0	0	0	0	0	0	0	0	0	0	0	0	0	0	0	0	0	0	0	0	0	0	0	14	0	0	0	0	0	0	0	0	0	7	0	0	0	0	0	0	0	0	0	0	0	0	0	0	0
3401140	0	0	0	0	0	0	0	0	0	0	0	0	0	0	0	0	0	0	0	0	0	0	0	0	0	0	0	0	0	0	0	5	7	0	0	0	0	0	0	0	0	0	0	0	0	0	0	9	0
3846383	0	0	0	0	0	0	0	0	0	7	0	0	0	0	0	4	0	0	0	0	0	0	0	0	0	0	0	0	0	0	0	16	6	0	0	0	0	0	0	0	0	0	0	0	0	0	5	0	0
813892	0	3	0	0	0	14	0	0	0	0	0	0	0	0	0	0	9	0	0	0	0	0	0	0	0	0	0	0	0	0	0	0	0	0	0	0	0	0	0	0	0	0	0	0	0	0	0	0	0
3401144	0	6	0	0	0	68	0	0	0	0	0	0	0	0	0	0	4	0	0	0	0	0	0	0	0	0	0	0	0	0	0	3	0	0	0	5	0	0	0	0	0	0	0	0	0	0	0	18	0
New.CleanUp.ReferenceOTU169509	0	0	0	0	0	0	0	0	0	0	0	0	0	0	0	0	0	0	0	0	0	0	0	0	0	0	0	0	0	0	0	5	0	0	5	0	0	0	0	0	0	0	0	0	0	108	0	0	0
New.CleanUp.ReferenceOTU142643	0	0	0	0	0	0	0	0	0	3	0	0	0	0	0	0	0	0	0	0	0	0	0	0	0	0	0	0	0	0	0	0	0	0	0	0	0	0	0	0	0	0	0	0	0	0	0	0	0
New.CleanUp.ReferenceOTU45329	0	0	0	0	0	0	0	0	0	0	0	0	0	0	0	0	0	0	0	0	0	0	0	0	0	0	0	0	0	0	0	0	0	0	0	0	0	0	0	0	0	0	0	0	0	0	0	0	0
New.CleanUp.ReferenceOTU342146	0	0	0	0	0	0	0	0	0	0	0	0	0	0	0	0	0	0	0	0	0	0	0	0	0	0	0	0	0	0	0	0	0	0	0	0	0	0	0	0	0	0	0	0	0	0	0	0	0
New.CleanUp.ReferenceOTU347742	0	3	0	0	0	0	0	0	0	3	0	0	0	0	0	0	0	0	0	0	0	0	0	0	0	0	0	0	0	0	0	10	3	0	0	0	0	0	0	0	0	0	0	0	0	0	0	15	0
New.ReferenceOTU803	0	0	0	0	0	0	0	0	0	0	0	0	0	0	0	0	0	0	0	0	0	0	0	0	0	0	0	0	0	0	0	0	0	0	0	0	0	0	0	0	0	0	0	0	0	0	0	0	0
New.CleanUp.ReferenceOTU177842	0	0	0	0	0	0	0	0	0	0	0	0	0	0	0	0	0	0	0	0	0	0	0	0	0	0	0	0	0	0	0	0	0	0	0	0	0	0	0	0	0	0	0	0	0	0	0	0	0
New.ReferenceOTU405	0	0	0	0	0	0	0	0	0	0	0	0	0	0	0	0	0	0	0	0	0	0	0	0	0	0	0	0	0	0	0	0	4	0	0	0	0	0	0	0	0	0	0	0	0	0	0	0	0
New.CleanUp.ReferenceOTU264783	0	4	0	0	0	0	0	0	0	7	0	0	0	0	0	0	4	0	0	0	0	0	0	0	0	0	0	0	4	0	0	0	4	0	0	6	4	0	0	0	0	0	0	0	0	0	0	0	0
New.CleanUp.ReferenceOTU336958	0	0	0	0	0	0	0	0	0	4	0	0	0	0	0	0	0	0	0	0	0	0	3	0	0	0	0	0	0	0	0	26	0	0	0	0	0	0	0	0	0	0	0	0	0	0	0	23	0
New.CleanUp.ReferenceOTU50213	0	0	0	0	0	0	0	0	0	0	0	0	0	0	0	29	0	13	0	0	0	0	0	0	3	0	0	0	0	0	4	0	0	30	0	0	0	0	0	0	0	0	0	0	0	0	7	0	0
New.CleanUp.ReferenceOTU268781	0	6	0	0	0	12	0	0	0	7	0	0	0	0	0	0	4	0	0	0	0	0	0	0	0	0	0	0	0	0	0	0	0	0	0	0	0	0	0	0	0	0	0	0	0	0	0	0	0
990901	0	0	0	0	0	0	0	0	0	0	0	0	0	0	0	0	0	0	0	0	0	0	0	0	0	0	0	0	0	0	0	0	0	0	0	0	0	0	0	22	0	0	0	0	0	0	0	0	0
New.CleanUp.ReferenceOTU137063	0	3	0	0	0	0	0	0	0	7	0	0	0	0	0	0	0	3	0	0	0	0	0	0	0	0	0	0	0	0	0	17	0	0	0	0	0	0	0	0	0	0	0	0	0	0	0	0	0
3394221	0	0	0	0	0	0	0	0	0	0	0	0	0	0	0	0	0	0	0	0	0	0	0	0	0	0	0	0	0	0	0	0	0	0	0	0	0	0	0	0	0	0	0	0	0	0	0	0	0
New.CleanUp.ReferenceOTU259697	0	0	0	0	0	0	0	0	0	0	0	0	0	0	0	0	0	0	0	0	0	0	0	0	0	0	0	0	0	0	0	0	0	0	0	0	0	0	0	0	0	0	0	0	0	0	0	0	0
New.CleanUp.ReferenceOTU337612	0	0	0	0	0	0	0	0	0	0	0	0	0	0	0	0	0	0	0	0	0	0	0	0	0	0	0	0	0	0	0	0	0	0	0	0	0	0	0	0	0	0	0	0	0	0	0	0	0
821266	0	0	0	0	0	0	0	0	0	0	0	0	0	0	0	0	0	0	0	0	0	0	0	0	0	0	0	0	0	0	0	0	0	0	0	0	0	0	0	21	0	0	0	0	0	0	0	0	0
135762	0	0	0	0	0	0	0	0	0	0	0	0	0	0	0	0	0	0	0	0	0	0	0	0	0	0	0	0	0	0	0	0	0	0	0	0	0	0	0	0	0	0	0	0	0	0	0	0	0
New.CleanUp.ReferenceOTU246151	0	0	0	0	0	54	0	0	0	3	0	0	0	0	0	0	0	0	0	0	0	0	0	0	0	0	0	0	0	0	0	0	0	0	0	0	0	0	0	0	0	0	0	0	0	0	0	0	0
638186	0	0	0	0	0	0	0	0	0	0	0	0	0	0	0	0	0	0	0	0	0	0	0	0	0	0	0	0	0	0	0	0	0	0	0	0	0	0	0	0	0	0	0	0	0	0	0	0	0
New.CleanUp.ReferenceOTU240432	0	0	0	0	0	0	0	0	0	0	0	0	0	0	0	0	0	0	0	0	0	0	0	0	0	0	0	0	0	0	0	0	0	14	0	6	0	0	0	44	0	0	0	0	0	0	0	0	0
New.CleanUp.ReferenceOTU297720	0	0	0	0	0	0	0	0	0	0	0	0	0	0	0	0	0	0	0	0	0	0	0	0	0	0	0	0	0	0	0	0	0	0	0	0	0	0	0	0	0	0	0	0	0	0	0	0	0
New.CleanUp.ReferenceOTU323249	0	0	0	0	0	0	0	0	0	0	0	0	0	0	0	0	0	0	0	0	0	0	0	0	0	0	0	0	0	0	0	0	0	0	0	0	0	0	0	0	0	0	0	0	0	0	0	0	0
New.CleanUp.ReferenceOTU317535	0	0	0	0	0	0	0	0	0	0	0	0	0	0	0	0	0	0	0	0	0	0	0	0	0	0	0	0	0	0	0	0	0	0	0	0	0	0	0	0	0	0	0	0	0	0	0	0	0
New.CleanUp.ReferenceOTU152275	0	0	0	0	0	0	0	0	0	0	0	0	0	0	0	0	0	0	0	0	0	0	0	0	0	0	0	0	0	0	0	0	0	0	0	0	0	0	0	0	0	0	0	0	0	0	0	0	0
4405643	0	0	0	0	0	0	0	0	0	0	0	0	0	0	0	0	0	0	0	0	0	0	0	0	0	0	0	0	0	0	0	0	19	0	0	0	0	0	0	0	0	0	0	0	0	0	0	0	0
New.ReferenceOTU260	0	0	0	0	0	0	0	0	0	0	0	0	0	0	0	0	0	0	0	0	0	0	0	0	0	0	0	0	0	0	0	0	0	0	0	0	0	0	0	0	0	0	0	0	0	0	0	0	0
New.CleanUp.ReferenceOTU153435	0	0	0	0	0	0	0	0	0	0	0	0	0	0	0	0	0	0	0	0	0	0	0	0	0	0	0	0	0	0	0	0	0	0	0	0	0	0	0	0	0	0	0	0	0	0	0	0	0
4369968	0	0	0	0	0	0	0	0	0	0	0	0	0	0	0	0	0	0	0	0	0	0	0	0	0	0	0	0	0	0	0	0	0	0	0	0	0	0	0	0	0	0	0	0	0	0	0	0	0
New.CleanUp.ReferenceOTU242123	0	0	0	0	0	0	0	0	0	0	0	0	0	0	0	0	0	0	0	0	0	0	0	0	0	0	0	0	0	0	0	0	0	0	0	0	0	0	0	0	0	0	0	0	0	0	0	0	0
New.ReferenceOTU381	0	0	0	0	0	0	0	0	0	0	0	0	0	0	0	0	0	0	0	0	0	0	0	0	0	0	0	0	0	0	0	0	0	0	0	0	0	0	0	0	0	0	0	0	0	0	0	0	0
New.CleanUp.ReferenceOTU158669	0	0	0	0	0	0	0	0	0	0	0	0	0	0	0	0	0	0	0	0	0	0	0	0	0	0	0	0	0	0	0	0	0	0	0	0	0	0	0	0	0	0	0	0	0	0	0	0	0
1111372	0	0	0	0	0	0	0	0	0	0	0	0	0	0	0	0	0	0	0	0	0	0	0	0	0	0	0	0	0	0	0	0	0	0	0	0	0	0	0	0	0	0	0	0	0	0	0	0	0
New.CleanUp.ReferenceOTU216535	0	0	0	0	0	0	0	0	0	0	0	0	0	0	0	0	0	0	0	0	0	0	0	0	0	0	0	0	0	0	0	0	0	0	0	0	0	0	0	0	0	0	0	0	0	0	0	0	0
New.CleanUp.ReferenceOTU357033	0	0	0	0	0	0	0	0	0	0	0	0	0	0	0	0	0	0	0	0	0	0	0	0	0	0	0	0	0	0	0	0	33	0	0	0	0	0	0	0	0	0	0	0	0	0	0	0	0
New.CleanUp.ReferenceOTU84272	0	0	0	0	0	29	0	0	0	0	0	0	0	0	0	0	9	0	0	0	0	0	0	0	0	0	0	0	0	0	0	8	37	0	8	3	0	0	0	0	0	3	0	0	0	0	0	0	0
516463	0	0	0	0	0	0	0	0	0	0	0	0	5	0	177	0	0	0	0	0	0	0	0	0	0	0	0	0	0	0	0	3	0	0	5	6	9	0	0	0	0	0	0	0	4	0	0	13	0
New.CleanUp.ReferenceOTU246021	0	0	0	0	0	0	0	0	0	0	0	0	0	32	0	0	0	0	0	0	0	0	0	0	7	0	0	0	0	0	0	0	0	0	0	4	0	0	0	0	0	0	0	0	0	0	0	0	0
New.ReferenceOTU226	0	0	0	0	0	3	0	0	0	0	0	0	0	0	276	0	0	0	0	0	0	0	0	0	0	0	0	0	0	0	0	0	0	0	0	0	0	0	0	0	0	0	0	0	0	0	0	3	0
New.CleanUp.ReferenceOTU187872	0	0	0	0	0	0	0	0	0	0	0	0	0	0	0	0	0	0	0	0	0	0	0	0	0	0	0	0	0	0	0	0	5	0	0	0	0	0	0	0	0	0	0	0	0	0	0	0	0
New.CleanUp.ReferenceOTU18583	0	0	0	0	0	0	0	0	0	0	0	0	0	0	0	0	0	0	0	0	0	0	0	0	0	0	0	0	0	0	0	0	0	0	0	0	0	0	0	0	0	0	0	0	0	0	0	0	0
New.CleanUp.ReferenceOTU218364	0	0	0	0	0	0	0	0	0	0	0	0	0	0	0	0	0	0	0	0	0	0	0	0	0	0	0	0	0	0	0	0	0	0	0	0	0	0	0	0	0	0	0	0	0	0	0	0	0
New.CleanUp.ReferenceOTU342756	0	0	0	0	0	0	0	0	0	0	0	0	0	0	0	0	0	0	0	0	0	0	0	0	0	0	0	0	0	0	0	0	10	0	0	0	0	0	0	0	0	0	0	0	0	0	0	0	0
New.CleanUp.ReferenceOTU54714	0	0	0	0	0	0	0	0	0	0	0	0	0	0	0	0	0	0	0	0	0	0	0	0	0	0	0	0	0	0	0	0	0	0	0	0	0	0	0	0	0	0	0	0	0	0	0	0	0
326719	0	0	0	0	0	0	0	0	0	0	0	0	0	0	0	0	0	0	0	0	0	0	0	0	0	0	0	0	0	0	0	0	0	0	0	0	0	0	0	0	0	0	0	0	0	0	0	0	0
New.CleanUp.ReferenceOTU280566	0	0	0	0	0	0	0	0	0	0	0	0	0	0	0	0	0	0	0	0	0	0	0	0	0	0	0	0	0	0	0	0	0	0	0	0	0	0	0	0	0	0	0	0	0	0	0	0	0
246011	0	0	0	0	0	0	0	0	0	0	0	0	0	0	0	0	0	0	0	0	0	0	0	0	0	0	0	0	0	0	0	0	0	0	0	0	0	0	0	0	0	0	0	0	0	0	0	0	0
New.CleanUp.ReferenceOTU93471	0	0	0	0	0	0	0	0	0	0	0	0	0	0	0	0	0	0	0	0	0	0	0	0	0	0	0	0	0	0	0	0	0	0	0	0	0	0	0	0	0	0	0	0	0	0	0	0	0
New.CleanUp.ReferenceOTU278476	0	0	0	0	0	0	0	0	0	0	0	0	0	0	0	0	0	0	0	0	0	0	0	0	0	0	0	0	0	0	0	0	0	0	0	0	0	0	0	0	0	0	0	0	0	0	0	0	0
New.CleanUp.ReferenceOTU270523	0	0	0	0	0	0	0	0	0	0	0	0	0	0	0	0	0	0	0	0	0	0	0	0	0	0	0	0	0	0	0	0	0	0	0	0	0	0	0	0	0	0	0	0	0	0	0	0	0
New.CleanUp.ReferenceOTU257912	0	0	0	0	0	0	0	0	0	0	0	0	0	0	0	0	0	0	0	0	0	0	0	0	0	0	0	0	0	0	0	0	0	0	0	0	0	0	0	0	0	0	0	0	0	0	0	0	0
New.CleanUp.ReferenceOTU259796	0	0	0	0	0	0	0	0	0	0	0	0	0	0	0	0	0	0	0	0	0	0	0	0	0	0	0	0	0	0	0	0	0	0	0	0	0	0	0	0	0	0	0	0	0	0	0	0	0
New.ReferenceOTU931	0	0	0	0	0	0	0	0	0	0	0	0	0	0	3	0	0	0	0	0	0	0	0	0	0	0	0	0	0	0	0	0	0	0	0	0	0	0	0	0	0	0	0	0	0	0	0	0	0
558858	0	14	0	0	0	0	0	0	0	0	0	0	0	0	0	0	0	0	0	0	0	0	0	0	0	0	0	0	0	0	0	0	10	0	0	14	4	0	0	0	0	0	0	0	0	0	0	3	0
3878646	0	15	0	0	0	0	0	0	0	0	0	0	0	0	0	0	0	0	0	0	0	0	0	0	0	0	0	0	0	0	0	0	0	0	3	3	0	0	0	0	0	0	0	0	0	0	0	3	0
New.ReferenceOTU526	0	0	0	0	0	0	0	0	0	0	0	0	0	0	0	0	0	0	0	0	0	0	0	0	0	0	0	0	0	0	0	0	0	0	0	0	0	0	0	0	0	0	0	0	0	0	0	0	0
New.CleanUp.ReferenceOTU90400	0	0	0	0	0	0	0	0	0	0	0	0	0	0	0	0	0	0	0	0	0	0	0	0	0	0	0	0	0	0	0	0	0	0	0	0	0	0	0	0	0	0	0	0	0	0	0	0	0
New.ReferenceOTU271	0	0	0	0	0	0	0	0	0	0	0	0	0	0	0	0	0	0	0	0	0	0	0	0	0	0	0	0	0	0	0	0	0	0	0	0	0	0	0	0	0	0	0	0	0	0	0	0	0
New.CleanUp.ReferenceOTU291804	0	0	0	0	0	0	0	0	0	0	0	0	0	0	0	0	0	0	0	0	0	0	0	0	0	0	0	0	0	0	0	0	0	0	0	0	0	0	0	0	0	0	0	0	0	0	0	0	0
New.ReferenceOTU930	0	0	0	0	0	0	0	0	0	0	0	0	0	0	0	0	0	0	0	0	0	0	0	0	0	0	0	0	0	0	0	0	0	0	0	0	0	0	0	0	0	0	0	0	0	0	0	0	0
279355	0	0	0	0	0	0	0	0	0	0	0	0	0	0	0	0	0	0	0	0	0	0	0	0	0	0	0	0	0	0	0	0	0	0	0	0	0	0	0	0	0	0	0	0	0	0	0	0	0
New.ReferenceOTU149	0	0	0	0	0	0	0	0	0	0	0	0	0	0	0	0	0	0	0	0	0	0	0	0	0	0	0	0	0	0	0	0	0	0	0	0	0	0	0	0	0	0	0	0	0	0	0	0	0
New.ReferenceOTU722	0	0	0	0	0	0	0	0	0	0	0	0	0	0	0	0	0	0	0	0	0	0	0	0	0	0	0	0	0	0	0	0	0	0	0	0	0	0	0	0	0	0	0	0	0	0	0	0	0
4334132	0	0	0	0	0	0	0	0	0	0	0	0	0	0	0	0	0	0	0	0	0	0	0	0	0	0	0	0	0	0	0	0	0	0	0	0	0	0	0	0	0	0	0	0	0	0	0	0	0
4482563	0	0	0	0	0	0	0	0	0	0	0	0	0	0	0	0	0	0	0	0	0	0	0	0	0	0	0	0	0	0	0	0	0	0	0	0	0	0	0	0	0	0	0	0	0	0	0	0	0
New.CleanUp.ReferenceOTU161374	0	0	0	0	0	0	0	0	0	0	0	0	0	0	0	0	0	0	0	0	0	0	0	0	0	0	0	0	0	0	0	0	0	0	0	0	0	0	0	0	0	0	0	0	0	0	0	0	0
New.ReferenceOTU128	0	0	0	0	0	0	0	0	0	0	0	0	0	0	0	0	0	0	0	0	0	0	0	0	0	0	0	0	0	0	0	0	0	0	0	0	0	0	0	0	0	0	0	0	0	0	0	0	0
New.CleanUp.ReferenceOTU154020	0	0	0	0	0	0	0	0	0	0	0	0	0	0	0	0	0	0	0	0	0	0	0	0	0	0	0	0	0	0	0	0	0	0	0	0	0	0	0	0	0	0	0	0	0	0	0	0	0
New.CleanUp.ReferenceOTU146211	0	0	0	0	0	0	0	0	0	0	0	0	0	0	0	0	0	0	0	0	0	0	0	0	0	0	0	0	0	0	0	0	0	0	0	0	0	0	0	0	0	0	0	0	0	0	0	0	0
New.CleanUp.ReferenceOTU158	0	0	0	0	0	0	0	0	0	0	0	0	0	0	0	0	0	0	0	0	0	0	0	0	0	0	0	0	0	0	0	0	0	0	0	0	0	0	0	0	0	0	0	0	0	0	0	0	0
New.CleanUp.ReferenceOTU114744	0	0	0	0	0	0	0	0	0	0	0	0	0	0	0	0	0	0	0	0	0	0	0	0	0	0	0	0	0	0	0	0	0	0	0	0	0	0	0	0	0	0	0	0	0	0	0	0	0
New.CleanUp.ReferenceOTU291574	0	0	0	0	0	0	0	0	0	0	0	0	0	0	0	0	0	0	0	0	0	0	0	0	0	0	0	0	0	0	0	0	0	0	0	0	0	0	0	0	0	0	0	0	0	0	0	0	0
New.CleanUp.ReferenceOTU64730	0	0	0	0	0	0	0	0	0	0	0	0	0	0	0	0	0	0	0	0	0	0	0	0	0	0	0	0	0	0	0	0	0	0	0	0	0	0	0	0	0	0	0	0	0	0	0	0	0
New.CleanUp.ReferenceOTU29787	0	0	0	0	0	0	0	0	0	0	0	0	0	0	0	0	0	0	0	0	0	0	0	0	0	0	0	0	0	0	0	0	0	0	0	0	0	0	0	0	0	0	0	0	0	0	0	0	0
New.CleanUp.ReferenceOTU136127	0	0	0	0	0	0	0	0	0	0	0	0	0	0	0	0	0	0	0	0	0	0	0	0	0	0	0	0	0	0	0	0	0	0	0	0	0	0	0	0	0	0	0	0	0	0	0	0	0
New.CleanUp.ReferenceOTU166691	0	0	0	0	0	0	0	0	0	0	0	0	0	0	0	0	0	0	0	0	0	0	0	0	0	0	0	0	0	0	0	0	0	0	0	0	0	0	0	0	0	0	0	0	0	0	0	0	0
549231	0	0	0	0	0	0	0	0	0	0	0	0	0	0	0	0	0	0	0	0	0	0	0	0	0	0	0	0	0	0	0	0	0	0	0	0	0	0	0	0	0	0	0	0	0	0	0	0	0
New.CleanUp.ReferenceOTU202526	0	0	0	0	0	0	0	0	0	0	0	0	0	0	0	0	0	0	0	0	0	0	0	0	0	0	0	0	0	0	0	0	0	0	0	0	0	0	0	0	0	0	0	0	0	0	0	0	0
512552	0	0	0	0	0	0	0	0	0	0	0	0	0	0	0	0	0	0	0	0	0	0	0	0	0	0	0	0	0	0	0	0	0	0	0	0	0	0	0	0	0	0	0	0	0	0	0	0	0
New.CleanUp.ReferenceOTU132753	0	0	0	0	0	0	0	0	0	0	0	0	0	0	0	0	0	0	0	0	0	0	0	0	0	0	0	0	0	0	0	0	0	0	0	0	0	0	0	0	0	0	0	0	0	0	0	0	0
New.CleanUp.ReferenceOTU205338	0	0	0	0	0	0	0	0	0	0	0	0	0	0	0	0	0	0	0	0	0	0	0	0	0	0	0	0	0	0	0	0	0	0	0	0	0	0	0	0	0	0	0	0	0	0	0	0	0
New.ReferenceOTU408	0	0	0	0	0	0	0	0	0	0	0	0	0	0	0	0	0	0	0	0	0	0	0	0	0	0	0	0	0	0	0	0	0	0	0	0	0	0	0	0	0	0	0	0	0	0	0	0	0
New.CleanUp.ReferenceOTU288217	0	0	0	0	0	0	0	0	0	0	0	0	0	0	0	0	0	0	0	0	0	0	0	0	0	0	0	0	0	0	0	0	0	0	0	0	0	0	0	0	0	0	0	0	0	0	0	0	0
New.ReferenceOTU1121	0	0	0	0	0	0	0	0	0	0	0	0	0	0	0	0	0	0	0	0	0	0	0	0	0	0	0	0	0	0	0	0	0	0	0	0	0	0	0	0	0	0	0	0	0	0	0	0	0
816665	0	0	0	0	0	0	0	0	0	0	0	0	0	0	0	0	0	0	0	0	0	0	0	0	0	0	0	104	0	0	0	0	0	0	0	3	0	0	0	0	0	0	0	0	0	0	0	0	0
New.CleanUp.ReferenceOTU65176	0	0	0	0	0	0	0	0	0	0	0	0	0	0	0	0	0	0	0	0	0	0	0	0	0	0	0	0	0	0	0	0	0	0	0	0	0	0	0	0	0	0	0	0	0	0	0	0	0
4423662	0	0	0	0	0	0	0	0	0	0	0	0	0	0	0	0	0	0	0	0	0	0	0	0	0	0	0	0	0	0	0	0	0	0	0	0	0	0	0	0	0	0	0	0	0	0	0	0	0
New.CleanUp.ReferenceOTU250366	0	0	0	0	0	0	0	0	0	0	0	0	0	0	0	0	0	0	0	0	0	0	0	0	0	0	0	0	0	0	0	0	0	0	0	0	0	0	0	0	0	0	0	0	0	0	0	0	0
New.CleanUp.ReferenceOTU105513	0	0	0	0	0	0	0	0	0	0	0	0	0	0	0	0	0	0	0	0	0	0	0	0	0	0	0	0	0	0	0	0	0	0	0	0	0	0	0	0	0	0	0	0	0	0	0	0	0
New.CleanUp.ReferenceOTU193474	0	0	0	0	0	0	0	0	0	0	0	0	0	0	0	0	0	0	0	0	0	0	0	0	0	0	0	0	0	0	0	0	0	0	0	0	0	0	0	0	0	0	0	0	0	0	0	0	0
New.CleanUp.ReferenceOTU145233	0	0	0	0	0	0	0	0	0	0	0	0	0	0	0	0	0	0	0	0	0	0	0	0	0	0	0	0	0	0	0	0	0	0	0	0	0	0	0	0	0	0	0	0	0	0	0	0	0
321885	0	0	0	0	0	0	0	0	0	0	0	0	0	0	0	0	0	0	0	0	0	0	0	0	0	0	0	0	0	0	0	0	0	0	0	0	0	0	0	0	0	0	0	0	0	0	0	0	0
New.CleanUp.ReferenceOTU203284	0	0	0	0	0	0	0	0	0	0	0	0	0	0	0	0	0	0	0	0	0	0	0	0	0	0	0	0	0	0	0	0	0	0	0	0	0	0	0	0	0	0	0	0	0	0	0	0	0
4316443	0	0	0	0	0	0	0	0	0	0	0	0	0	0	0	0	0	0	0	0	0	0	0	0	0	0	0	0	0	0	0	0	0	0	0	0	0	0	0	0	0	0	0	0	0	0	0	0	0
New.CleanUp.ReferenceOTU13361	0	0	0	0	0	0	0	0	0	0	0	0	0	0	0	0	0	0	0	0	0	0	0	0	0	0	0	0	0	0	0	0	0	0	0	0	0	0	0	0	0	0	0	0	0	0	0	0	0
New.CleanUp.ReferenceOTU24448	0	0	0	0	0	0	0	0	0	0	0	0	0	0	0	0	0	0	0	0	0	0	0	0	0	0	0	0	0	0	0	0	0	0	0	0	0	0	0	0	0	0	0	0	0	0	0	0	0
New.ReferenceOTU52	0	0	0	0	0	0	0	0	0	0	0	0	0	0	0	0	0	0	0	0	0	0	0	0	0	0	0	0	0	0	0	0	0	0	0	0	0	0	0	0	0	0	0	0	0	0	0	0	0
New.CleanUp.ReferenceOTU80380	0	0	0	0	0	0	0	0	0	0	0	0	0	0	0	0	0	0	0	0	0	0	0	0	0	0	0	0	0	0	0	0	0	0	0	0	0	0	0	0	0	0	0	0	0	0	0	0	0
New.CleanUp.ReferenceOTU123691	0	0	0	0	0	0	0	0	0	0	0	0	0	0	0	0	0	0	0	0	0	0	0	0	0	0	0	0	0	0	0	0	0	0	0	0	0	0	0	0	0	0	0	0	0	0	0	0	0
New.CleanUp.ReferenceOTU35486	0	0	0	0	0	0	0	0	0	0	0	0	0	0	0	0	0	0	0	0	0	0	0	0	0	0	0	0	0	0	0	0	0	0	0	0	0	0	0	0	0	0	0	0	0	0	0	0	0
318184	0	0	0	0	0	0	0	0	0	0	0	0	0	0	0	0	0	0	0	0	0	0	0	0	0	0	0	0	0	0	0	0	0	0	0	0	0	0	0	0	0	0	0	0	0	0	0	0	0
1059681	0	0	0	0	0	0	0	0	0	0	0	0	0	0	0	0	0	0	0	0	0	0	0	0	0	0	0	0	0	0	0	0	0	0	0	0	0	0	0	0	0	0	0	0	0	0	0	0	0
New.CleanUp.ReferenceOTU30561	0	0	0	0	0	0	0	0	0	0	0	0	0	0	0	0	0	0	0	0	0	0	0	0	0	0	0	0	0	0	0	0	0	0	0	0	0	0	0	0	0	0	0	0	0	0	0	0	0
New.CleanUp.ReferenceOTU162526	0	0	0	0	0	0	0	0	0	0	0	0	0	0	0	0	0	0	0	0	0	0	0	0	0	0	0	0	0	0	0	0	0	0	0	0	0	0	0	0	0	0	0	0	0	0	0	0	0
New.CleanUp.ReferenceOTU184040	0	0	0	0	0	0	0	0	0	0	0	0	0	0	0	0	0	0	0	0	0	0	0	0	0	0	0	0	0	0	0	0	0	0	0	0	0	0	0	0	0	0	0	0	0	0	0	0	0
New.CleanUp.ReferenceOTU267527	0	0	0	0	0	0	0	0	0	0	0	0	0	0	0	0	0	0	0	0	0	0	0	0	0	0	0	0	0	0	0	0	0	0	0	0	0	0	0	0	0	0	0	0	0	0	0	0	0
New.CleanUp.ReferenceOTU114951	0	0	0	0	0	0	0	0	0	0	0	0	0	0	0	0	0	0	0	0	0	0	0	0	0	0	0	0	0	0	0	0	0	0	0	0	0	0	0	0	0	0	0	0	0	0	0	0	0
New.CleanUp.ReferenceOTU60720	0	0	0	0	0	0	0	0	0	0	0	0	0	0	0	0	0	0	0	0	0	0	0	0	0	0	0	0	0	0	0	0	0	0	0	0	0	0	0	0	0	0	0	0	0	0	0	0	0
New.CleanUp.ReferenceOTU55703	0	0	0	0	0	0	0	0	0	0	0	0	0	0	0	0	0	0	0	0	0	0	0	0	0	0	0	0	0	0	0	0	0	0	0	0	0	0	0	0	0	0	0	0	0	0	0	0	0
New.CleanUp.ReferenceOTU256343	0	0	0	0	0	0	0	0	0	0	0	0	0	0	0	0	0	0	0	0	0	0	0	0	0	0	0	0	0	0	0	0	0	0	0	0	0	0	0	0	0	0	0	0	0	0	0	0	0
New.CleanUp.ReferenceOTU193243	0	0	0	0	0	0	0	0	0	0	0	0	0	0	0	0	0	0	0	0	0	0	0	0	0	0	0	0	0	0	0	0	0	0	0	0	0	0	0	0	0	0	0	0	0	0	0	0	0
New.CleanUp.ReferenceOTU211534	0	0	0	0	0	0	0	0	0	0	0	0	0	0	0	0	0	0	0	0	0	0	0	0	0	0	0	0	0	0	0	0	0	0	0	0	0	0	0	0	0	0	0	0	0	0	0	0	0
1719556	0	0	0	0	0	0	0	0	0	0	0	0	0	0	0	0	0	0	0	0	0	0	0	0	0	0	0	0	0	0	0	3	18	0	0	0	0	0	0	0	0	0	0	0	0	0	0	13	0
New.ReferenceOTU972	0	0	0	0	0	0	0	0	0	0	0	0	0	0	0	0	0	0	0	0	0	0	0	0	0	0	0	0	0	0	0	0	0	0	0	0	0	0	0	0	0	0	0	0	0	0	0	0	0
581403	0	3	0	0	0	0	0	0	0	0	0	0	0	0	0	0	0	0	0	0	0	0	0	0	0	0	0	0	0	0	0	0	0	0	0	0	0	0	0	0	0	0	0	0	0	0	0	0	0
New.CleanUp.ReferenceOTU75862	0	0	0	0	0	0	0	0	0	0	0	0	0	0	0	0	0	0	0	0	0	0	0	0	0	0	0	0	0	0	0	0	0	0	0	0	0	0	0	0	0	0	0	0	0	0	0	0	0
1719562	0	0	0	0	0	0	3	11	52	0	6	0	0	73	0	66	0	12	0	0	222	10	0	25	11	0	15	0	0	11	26	0	0	72	5	0	0	0	7	0	0	0	0	12	0	0	14	0	0
New.CleanUp.ReferenceOTU97753	0	0	0	0	0	0	0	0	0	0	0	0	0	0	0	0	0	0	0	0	0	0	0	0	0	0	0	0	0	0	0	0	0	0	0	0	0	0	0	0	0	0	0	0	0	0	0	0	0
New.ReferenceOTU93	0	0	0	0	0	0	0	0	0	0	0	0	0	0	0	0	0	0	0	0	0	0	0	0	0	0	0	0	0	0	0	4	4	0	0	0	0	0	0	0	0	0	0	0	0	156	0	0	0
New.CleanUp.ReferenceOTU140102	0	0	0	0	0	0	0	0	0	0	0	0	0	0	0	0	0	0	0	0	0	0	0	0	0	0	0	0	0	0	0	0	0	0	0	0	0	0	0	0	0	0	0	0	0	0	0	0	0
588684	0	0	0	0	0	0	0	0	0	4	0	0	0	0	0	0	0	0	0	0	0	0	0	0	0	3	0	0	0	0	0	0	46	0	0	0	0	0	0	0	0	0	0	0	0	0	0	5	0
202982	0	0	0	0	0	0	0	0	0	0	0	0	0	0	0	0	0	0	0	0	0	0	0	0	0	0	0	0	0	0	0	0	17	0	0	0	0	0	0	0	0	0	0	0	0	0	0	0	0
New.ReferenceOTU713	0	0	0	0	0	0	0	0	0	0	0	0	0	0	0	0	0	0	0	0	0	0	0	0	0	0	0	0	0	0	0	0	0	0	0	0	0	0	0	0	0	0	0	0	0	0	0	0	0
590690	0	0	0	0	0	0	0	3	0	0	0	0	0	82	0	37	0	14	0	0	0	0	0	0	0	0	0	0	0	0	3	0	3	11	0	0	0	0	0	0	0	0	0	0	0	81	7	3	0
New.ReferenceOTU1096	0	0	0	0	0	0	0	0	0	0	0	0	0	0	0	0	0	0	0	0	0	0	0	0	0	0	0	0	0	0	0	0	0	0	0	0	0	0	0	0	0	0	0	0	0	0	0	0	0
528610	0	0	0	0	0	0	0	0	0	0	0	0	0	0	0	0	0	0	0	0	0	0	0	0	0	0	0	0	0	0	0	0	0	0	0	0	0	0	0	0	0	0	0	0	0	0	0	0	0
268742	0	0	0	0	0	0	0	0	0	0	0	0	0	0	0	0	0	0	0	0	0	0	0	0	0	0	0	0	0	0	0	0	0	0	0	0	0	0	0	0	0	0	0	0	0	0	0	0	0
1896092	0	0	0	0	0	0	0	0	0	0	0	0	0	0	0	0	0	0	0	0	0	0	0	0	0	0	0	0	0	0	0	0	0	0	0	0	0	0	0	0	0	0	0	0	0	0	0	0	0
New.ReferenceOTU676	0	0	0	0	0	0	0	0	0	0	0	0	0	0	0	0	0	0	0	0	0	0	0	0	0	0	0	0	0	0	0	0	0	0	0	0	0	0	0	0	0	0	0	0	0	0	0	0	0
2339928	0	0	0	0	0	0	0	0	0	0	0	0	0	0	0	0	0	0	0	0	0	0	0	0	0	0	0	0	0	0	0	0	0	0	0	0	0	0	0	0	0	0	0	0	0	0	0	0	0
New.ReferenceOTU188	0	0	0	0	0	0	0	0	0	0	0	0	0	0	0	0	0	0	0	0	0	0	0	0	0	0	0	0	0	0	0	0	0	0	0	0	0	0	0	0	0	0	0	0	0	0	0	0	0
New.CleanUp.ReferenceOTU218538	0	0	0	0	0	0	0	0	0	0	0	0	0	0	0	0	0	0	0	0	0	0	0	0	0	0	0	0	0	0	0	0	0	0	0	0	0	0	0	0	0	0	0	0	0	0	0	0	0
524860	0	0	0	0	0	0	0	0	0	0	0	0	0	0	0	0	0	0	0	0	0	0	0	0	0	0	0	0	0	0	0	0	0	0	0	0	0	0	0	0	0	0	0	0	0	0	0	0	0
513834	0	0	0	0	0	0	0	0	0	0	0	0	0	0	0	0	0	0	0	0	0	0	0	0	0	0	0	0	0	0	0	0	0	0	0	0	0	0	0	0	0	0	0	0	0	0	0	0	0
278955	0	0	0	0	0	0	0	0	0	0	0	0	0	0	0	0	0	0	0	0	0	0	0	0	0	0	0	0	0	0	0	0	0	0	0	0	0	0	0	0	0	0	0	0	0	0	0	0	0
279203	0	0	0	0	0	0	0	0	0	0	0	0	0	0	0	0	3	0	0	0	0	0	0	0	0	0	0	0	0	0	0	0	0	0	0	0	0	0	0	0	0	0	0	0	0	0	0	0	0
4344099	0	0	0	0	0	0	0	0	0	0	0	0	0	0	0	0	0	0	0	0	0	0	0	0	0	0	0	0	0	0	0	0	0	0	0	0	0	0	0	0	0	0	0	0	0	0	0	0	0
New.CleanUp.ReferenceOTU144218	0	0	0	0	0	0	0	0	0	0	0	0	0	0	0	23	0	21	0	0	0	0	0	0	3	0	0	0	0	0	0	6	16	0	0	0	0	0	0	0	0	0	0	0	0	0	0	5	0
242145	0	3	0	0	0	0	0	0	0	0	0	0	0	0	0	0	0	0	0	0	0	0	0	0	0	0	0	0	0	0	0	4	0	0	3	3	4	0	0	0	0	0	0	0	0	0	0	0	0
524436	0	0	0	0	0	0	0	0	0	0	0	0	0	0	0	0	0	0	0	0	0	0	0	0	0	0	0	0	0	0	0	0	0	0	0	0	0	0	0	0	0	0	0	0	0	0	0	0	0
New.ReferenceOTU445	0	0	0	0	0	0	0	0	0	0	0	0	0	0	0	0	0	0	0	0	0	0	0	0	0	0	0	0	0	0	0	0	0	0	0	0	0	0	0	0	0	0	0	0	0	0	0	0	0
New.ReferenceOTU230	0	6	0	0	0	0	0	0	0	0	0	0	0	0	0	0	0	0	0	0	0	0	0	0	0	0	0	0	0	0	0	0	0	0	0	0	0	0	0	0	0	0	0	0	0	0	0	0	0
242138	0	0	0	0	0	0	0	0	0	0	0	0	0	0	0	0	0	0	0	0	0	0	0	0	0	0	0	0	0	0	0	0	0	0	0	0	0	0	0	0	0	0	0	0	0	0	0	0	0
New.CleanUp.ReferenceOTU200437	0	0	0	0	0	0	0	0	0	0	0	0	0	0	0	0	0	0	0	0	0	0	0	0	0	0	0	0	0	0	0	0	0	0	0	0	0	0	0	0	0	0	0	0	0	0	0	0	0
1089898	0	0	0	0	0	0	0	0	0	0	0	0	0	0	0	0	0	0	0	0	0	0	0	0	0	0	0	0	0	0	0	0	0	0	0	0	0	0	0	0	0	0	0	0	0	0	0	0	0
527118	0	0	0	0	0	0	0	0	0	0	0	0	0	0	0	0	0	0	0	0	0	0	0	0	0	0	0	0	0	0	0	0	0	0	0	0	0	0	0	0	0	0	0	0	0	0	0	0	0
New.CleanUp.ReferenceOTU279083	0	0	0	0	0	0	0	0	0	0	0	0	0	0	0	0	0	0	0	0	0	0	0	0	0	0	0	0	0	0	0	0	0	0	0	0	0	0	0	0	0	0	0	0	0	0	0	0	0
210832	0	0	0	0	0	0	0	0	0	0	0	0	0	0	0	0	0	0	0	0	0	0	0	0	0	0	0	0	0	0	0	0	0	0	0	0	0	0	0	0	0	0	0	0	0	0	0	0	0
3004650	0	0	0	0	0	0	0	0	0	0	0	0	0	0	0	0	0	0	0	0	0	0	0	0	0	0	0	0	0	0	0	0	0	0	0	0	0	0	0	0	0	0	0	0	0	0	0	0	0
New.CleanUp.ReferenceOTU61185	0	0	0	0	0	0	0	0	0	0	0	0	0	0	0	0	0	0	0	0	0	0	0	0	0	0	0	0	0	0	0	0	0	0	0	0	0	0	0	0	0	0	0	0	0	0	0	0	0
New.CleanUp.ReferenceOTU183282	0	0	0	0	0	0	0	0	0	0	0	0	0	0	0	0	0	0	0	0	0	0	0	0	0	0	0	0	0	0	0	0	0	0	0	0	0	0	0	0	0	0	0	0	0	0	0	0	0
New.ReferenceOTU1132	0	0	0	0	0	0	0	0	0	0	0	0	0	0	0	0	0	0	0	0	0	0	0	0	0	0	0	0	0	0	0	0	0	0	0	0	0	0	0	0	0	0	0	0	0	0	0	0	0
New.CleanUp.ReferenceOTU194126	0	0	0	0	0	0	0	0	0	0	0	0	0	0	0	0	0	0	0	0	0	0	0	0	0	0	0	0	0	0	0	0	0	0	0	0	0	0	0	0	0	0	0	0	0	0	0	0	0
New.CleanUp.ReferenceOTU79622	0	0	0	0	0	0	0	0	0	0	0	0	0	0	0	0	0	0	0	0	0	0	0	0	0	0	0	0	0	0	0	0	0	0	0	0	0	0	0	0	0	0	0	0	0	0	0	0	0
277693	0	0	0	0	0	0	0	0	0	0	0	0	0	0	0	0	0	0	0	0	0	0	0	0	0	0	0	0	0	0	0	0	0	0	0	0	0	0	0	0	0	0	0	0	0	0	0	0	0
1102044	0	0	0	0	0	0	0	0	0	0	0	0	0	0	0	0	0	0	0	0	0	0	0	0	0	0	0	0	0	0	0	0	0	0	0	0	0	0	0	0	0	0	0	0	0	0	0	0	0
New.CleanUp.ReferenceOTU160215	0	0	0	0	0	0	0	0	0	0	0	0	0	0	0	0	0	0	0	0	0	0	0	0	0	0	0	0	0	0	0	0	3	0	0	0	0	0	0	0	0	0	0	0	0	0	0	0	0
New.CleanUp.ReferenceOTU87690	0	0	0	0	0	0	0	0	0	0	0	0	0	0	0	0	0	0	0	0	0	0	0	0	0	0	0	0	0	0	0	0	0	0	0	0	0	0	0	0	0	0	0	0	0	0	0	0	0
New.ReferenceOTU472	0	0	0	0	0	0	0	0	0	0	0	0	0	0	0	0	0	0	0	0	0	0	0	0	0	0	0	0	0	0	0	0	3	0	0	0	0	0	0	0	0	0	0	0	0	0	0	0	0
New.CleanUp.ReferenceOTU276384	0	0	0	0	0	0	0	0	0	0	0	0	0	0	0	0	0	0	0	0	0	0	0	0	0	0	0	0	0	0	0	0	0	0	0	0	0	0	0	0	0	0	0	0	0	0	0	0	0
New.CleanUp.ReferenceOTU291580	0	0	0	0	0	0	0	0	0	0	0	0	0	0	0	0	0	0	0	0	0	0	0	0	0	0	0	0	0	0	0	5	0	0	0	0	0	0	0	0	0	0	0	0	0	0	0	3	0
New.CleanUp.ReferenceOTU149608	0	0	0	0	0	0	0	0	0	0	0	0	0	0	0	0	0	0	0	0	0	0	0	0	0	0	0	0	0	0	0	0	0	0	0	0	0	0	0	0	0	0	0	0	0	0	0	0	0
New.ReferenceOTU988	0	0	0	0	0	0	0	0	0	0	0	0	0	0	0	0	0	0	0	0	0	0	0	0	0	0	0	0	0	0	0	0	0	0	0	0	0	0	0	0	0	0	0	0	0	0	0	0	0
New.CleanUp.ReferenceOTU221449	0	0	0	0	0	0	0	0	0	0	0	0	0	0	0	0	0	0	0	0	0	0	0	0	0	0	0	0	0	0	0	0	12	0	0	0	0	0	0	0	0	0	0	0	0	0	0	0	0
New.CleanUp.ReferenceOTU139235	0	0	0	0	0	0	0	0	0	0	0	0	0	0	0	0	0	0	0	0	0	0	0	0	0	0	0	0	0	0	0	0	0	0	0	0	0	0	0	0	0	0	0	0	0	0	0	0	0
New.CleanUp.ReferenceOTU193889	0	0	0	0	0	0	0	0	0	0	0	0	0	0	0	0	0	0	0	0	0	0	0	0	0	0	0	0	0	0	0	0	0	0	0	0	0	0	0	0	0	0	0	0	0	0	0	0	0
New.CleanUp.ReferenceOTU56100	0	0	0	0	0	0	0	0	0	0	0	0	0	0	0	0	0	0	0	0	0	0	0	0	0	0	0	0	0	0	0	0	0	0	0	0	0	0	0	0	0	0	0	0	0	0	0	0	0
New.CleanUp.ReferenceOTU196144	0	0	0	0	0	0	0	0	0	0	0	0	0	0	0	0	0	0	0	0	0	0	0	0	0	0	0	0	0	0	0	0	0	0	0	0	0	0	0	0	0	0	0	0	0	0	0	0	0
545782	0	0	0	0	0	0	0	0	0	0	0	0	0	0	0	0	0	0	0	0	0	0	0	0	0	0	0	0	0	0	0	0	0	0	0	0	0	0	0	0	0	0	0	0	0	0	0	0	0
New.CleanUp.ReferenceOTU115616	0	0	0	0	0	0	0	0	0	0	0	0	0	0	0	0	0	0	0	0	0	0	0	0	0	0	0	0	0	0	0	0	0	0	0	0	0	0	0	0	0	0	0	0	0	0	0	0	0
New.CleanUp.ReferenceOTU155426	0	0	0	0	0	0	0	0	0	0	0	0	0	0	0	0	0	0	0	0	0	0	0	0	0	0	0	0	0	0	0	0	0	0	0	0	0	0	0	0	0	0	0	0	0	0	0	0	0
New.CleanUp.ReferenceOTU287545	0	0	0	0	0	0	0	0	0	0	0	0	0	0	0	0	0	0	0	0	0	0	0	0	0	0	0	0	0	0	0	0	0	0	0	0	0	0	0	0	0	0	0	0	0	0	0	0	0
New.CleanUp.ReferenceOTU5093	0	0	0	0	0	0	0	0	0	0	0	0	0	0	0	0	0	0	0	0	0	0	0	0	0	0	0	0	0	0	0	0	0	0	0	0	0	0	0	0	0	0	0	0	0	0	0	0	0
New.CleanUp.ReferenceOTU106366	0	0	0	0	0	0	0	0	0	0	0	0	0	0	0	0	0	0	0	0	0	0	0	0	0	0	0	0	0	0	0	0	0	0	0	0	0	0	0	0	0	0	0	0	0	0	0	0	0
New.CleanUp.ReferenceOTU145974	0	0	0	0	0	0	0	0	0	0	0	0	0	0	0	0	0	0	0	0	0	0	0	0	0	0	0	0	0	0	0	0	0	0	0	0	0	0	0	0	0	0	0	0	0	0	0	0	0
New.CleanUp.ReferenceOTU160603	0	0	0	0	0	0	0	0	0	0	0	0	0	0	0	0	0	0	0	0	0	0	0	0	0	0	0	0	0	0	0	0	0	0	0	0	0	0	0	0	0	0	0	0	0	0	0	0	0
New.CleanUp.ReferenceOTU284761	0	0	0	0	0	0	0	0	0	0	0	0	0	0	0	0	0	0	0	0	0	0	0	0	0	0	0	0	0	0	0	0	0	0	0	0	0	0	0	0	0	0	0	0	0	0	0	0	0
New.CleanUp.ReferenceOTU109416	0	0	0	0	0	0	0	0	0	0	0	0	0	0	0	0	0	0	0	0	0	0	0	0	0	0	0	0	0	0	0	0	0	0	0	0	0	0	0	0	0	0	0	0	0	0	0	0	0
New.CleanUp.ReferenceOTU317477	0	0	0	0	0	0	0	0	0	0	0	0	0	0	0	0	0	0	0	0	0	0	0	0	0	0	0	0	0	0	0	0	0	0	0	0	0	0	0	0	0	0	0	0	0	0	0	0	0
New.CleanUp.ReferenceOTU187915	0	0	0	0	0	0	0	0	0	0	0	0	0	0	0	0	0	0	0	0	0	0	0	0	0	0	0	0	0	0	0	0	0	0	0	0	0	0	0	0	0	0	0	0	0	0	0	0	0
New.CleanUp.ReferenceOTU331185	0	0	0	0	0	0	0	0	0	0	0	0	0	0	0	0	0	0	0	0	0	0	0	0	0	0	0	0	0	0	0	0	0	0	0	0	0	0	0	0	0	0	0	0	0	0	0	0	0
New.CleanUp.ReferenceOTU277528	0	0	0	0	0	0	0	0	0	0	0	0	0	0	0	0	0	0	0	0	0	0	0	0	0	0	0	0	0	0	0	0	0	0	0	0	0	0	0	0	0	0	0	0	0	0	0	0	0
200854	0	0	0	0	0	0	0	0	0	0	0	0	0	0	0	0	0	0	0	0	0	0	0	0	0	0	0	0	0	0	0	0	0	0	0	0	0	0	0	0	0	0	0	0	0	0	0	0	0
New.CleanUp.ReferenceOTU186701	0	0	0	0	0	0	0	0	0	0	0	0	0	0	0	0	0	0	0	0	0	0	0	0	0	0	0	0	0	0	0	0	0	0	0	0	0	0	0	0	0	0	0	0	0	0	0	0	0
New.CleanUp.ReferenceOTU101522	0	0	0	0	0	0	0	0	0	0	0	0	0	0	0	0	0	0	0	0	0	0	0	0	0	0	0	0	0	0	0	0	0	0	0	0	0	0	0	0	0	0	0	0	0	0	0	0	0
New.CleanUp.ReferenceOTU297582	0	0	0	0	0	0	0	0	0	0	0	0	0	0	0	0	0	0	59	0	0	0	0	0	0	0	0	0	0	0	0	4	0	0	0	0	0	0	0	0	0	0	0	0	0	0	0	0	0
New.CleanUp.ReferenceOTU196381	0	0	0	0	0	0	0	0	0	0	0	0	0	0	0	0	0	0	0	0	0	0	0	0	0	0	0	0	0	0	0	0	0	0	0	0	0	0	0	0	0	0	0	0	0	0	0	0	0
252665	0	0	0	0	0	0	0	0	0	0	0	0	0	0	0	0	0	0	0	0	0	0	0	0	0	0	0	0	0	0	0	0	0	0	0	0	0	0	0	0	0	0	0	0	0	0	0	0	0
New.CleanUp.ReferenceOTU286077	0	0	0	0	0	0	0	0	0	0	0	0	0	0	0	0	0	0	0	0	0	0	0	0	0	0	0	0	0	0	0	0	0	0	0	0	0	0	0	0	0	0	0	0	0	0	0	0	0
4395041	0	0	0	0	0	0	0	0	0	0	0	0	0	0	0	0	0	0	0	0	0	0	0	0	0	0	0	0	0	0	0	0	0	0	0	0	0	0	0	0	0	0	0	0	0	0	0	0	0
669019	0	3	0	0	0	0	0	0	0	0	0	0	0	0	0	0	0	0	0	0	0	0	0	0	0	0	0	0	0	0	0	3	0	0	0	0	0	0	0	0	0	0	0	0	0	0	0	0	0
New.CleanUp.ReferenceOTU269390	0	0	0	0	0	0	0	0	0	0	0	0	0	0	0	0	0	0	0	0	0	0	0	0	0	0	0	0	0	0	0	0	0	0	0	0	0	0	0	0	0	0	0	0	0	0	0	0	0
218719	0	0	0	0	0	0	0	0	0	0	0	0	0	0	0	0	0	0	0	0	0	0	0	0	0	0	0	0	0	0	0	0	0	0	0	0	0	0	0	0	0	0	0	0	0	0	0	0	0
3205243	0	0	0	0	0	0	0	0	0	0	0	0	0	0	0	0	0	0	0	0	0	0	0	0	0	0	0	0	0	0	0	0	0	0	0	0	0	0	0	0	0	0	0	0	0	0	0	0	0
New.CleanUp.ReferenceOTU149102	0	0	0	0	0	0	0	0	0	0	0	0	0	0	0	0	0	0	0	0	0	0	0	0	0	0	0	0	0	0	0	0	0	0	0	0	0	0	0	0	0	0	0	0	0	0	0	0	0
New.CleanUp.ReferenceOTU206199	0	0	0	0	0	0	0	0	0	0	0	0	0	0	0	0	0	0	0	0	0	0	0	0	0	0	0	0	0	0	0	0	0	0	0	0	0	0	0	0	0	0	0	0	0	0	0	0	0
685193	0	17	0	0	0	8	0	0	0	0	0	0	3	0	0	0	0	0	0	0	0	0	0	0	0	0	0	0	0	0	0	0	0	0	3	0	3	0	0	0	0	0	0	0	21	0	0	50	0
New.CleanUp.ReferenceOTU247826	0	0	0	0	0	0	0	0	0	0	0	0	0	0	0	0	0	0	0	0	0	0	0	0	0	0	0	0	0	0	0	0	0	0	0	0	0	0	0	0	0	0	0	0	0	0	0	0	0
New.ReferenceOTU172	0	0	0	0	0	0	0	0	0	0	0	0	0	0	0	0	0	0	0	0	0	0	0	0	0	0	0	0	0	0	0	0	10	0	0	0	0	0	0	0	0	0	0	0	0	0	0	5	0
New.CleanUp.ReferenceOTU51992	0	0	0	0	0	0	0	0	0	0	0	0	0	0	0	0	0	0	0	0	0	0	0	0	0	0	0	0	0	0	0	0	0	0	0	0	0	0	0	0	0	0	0	0	0	0	0	0	0
91695	0	0	0	0	0	0	0	0	0	0	0	0	0	0	0	0	0	0	0	0	0	0	0	0	0	0	0	0	0	0	0	0	0	0	0	0	0	0	0	0	0	0	0	0	0	0	0	0	0
New.ReferenceOTU301	0	0	0	0	0	0	0	0	0	0	0	0	0	0	0	0	0	0	0	0	0	0	0	0	0	0	0	0	0	0	0	0	0	0	0	0	0	0	0	0	0	0	0	0	0	0	0	0	0
New.CleanUp.ReferenceOTU324980	0	0	0	0	0	0	0	0	0	0	0	0	0	0	0	0	0	0	0	0	0	0	0	0	0	0	0	0	0	0	0	0	0	0	0	0	0	0	0	0	0	0	0	0	0	0	0	0	0
New.CleanUp.ReferenceOTU275702	0	0	0	0	0	0	0	0	0	0	0	0	0	0	0	0	0	0	0	0	0	0	0	0	0	0	0	0	0	0	0	0	0	0	0	0	0	0	0	0	0	0	0	0	0	0	0	0	0
New.ReferenceOTU403	0	0	0	0	0	0	0	0	0	0	0	0	0	0	0	0	0	0	0	0	0	0	0	0	0	0	0	0	0	0	0	0	0	0	0	0	0	0	0	0	0	0	0	0	0	0	0	0	0
New.ReferenceOTU206	0	0	0	0	0	0	0	0	0	0	0	0	0	0	0	0	0	0	0	0	0	0	0	0	0	0	0	0	0	0	0	0	0	0	0	0	0	0	0	0	0	0	0	0	0	0	0	0	0
New.CleanUp.ReferenceOTU282128	0	0	0	0	0	0	0	0	0	0	0	0	0	0	0	0	0	0	0	0	0	0	0	0	0	0	0	0	0	0	0	0	0	0	0	0	0	0	0	0	0	0	0	0	0	0	0	0	0
New.ReferenceOTU742	0	0	0	0	0	0	0	0	0	0	0	0	0	0	0	0	0	0	0	0	0	0	0	0	0	0	0	0	0	0	0	0	0	0	0	0	0	0	0	0	0	0	0	0	0	0	0	0	0
New.ReferenceOTU479	0	0	0	0	0	0	0	0	0	0	0	0	0	0	0	0	0	0	0	0	0	0	0	0	0	0	0	0	0	0	0	0	0	0	0	0	0	0	0	0	0	0	0	0	0	0	0	0	0
New.CleanUp.ReferenceOTU291090	0	0	0	0	0	0	0	0	0	0	0	0	0	0	0	0	0	0	0	0	0	0	0	0	0	0	0	0	0	0	0	0	0	0	0	0	0	0	0	0	0	0	0	0	0	0	0	0	0
New.ReferenceOTU1131	0	0	0	0	0	0	0	0	0	0	0	0	0	0	0	0	0	0	0	0	0	0	0	0	0	0	0	0	0	0	0	0	0	0	0	0	0	0	0	0	0	0	0	0	0	0	0	0	0
New.ReferenceOTU1177	0	0	0	0	0	0	0	0	0	0	0	0	0	0	0	0	0	0	0	0	0	0	0	0	0	0	0	0	0	0	0	0	0	0	0	0	0	0	0	0	0	0	0	0	0	0	0	0	0
951455	0	0	0	0	0	0	0	0	0	0	0	0	0	0	0	0	0	0	0	0	0	0	0	0	0	0	0	0	0	0	0	0	0	0	0	0	0	0	0	0	0	0	0	0	0	0	0	0	0
New.ReferenceOTU1002	0	0	0	0	0	6	0	0	0	0	0	0	0	0	0	0	0	0	0	0	0	0	0	0	0	0	0	102	0	0	0	3	0	0	0	0	0	0	0	0	0	0	0	0	19	0	0	14	0
New.CleanUp.ReferenceOTU348114	0	0	0	0	0	0	0	0	0	0	0	0	0	0	0	0	0	0	0	0	0	0	0	0	0	0	0	0	0	0	0	0	0	0	0	0	0	0	0	0	0	0	0	0	0	0	0	0	0
New.CleanUp.ReferenceOTU348263	0	0	0	0	0	0	0	0	0	0	0	0	0	0	0	0	0	0	0	0	0	0	0	0	0	0	0	0	0	0	0	0	0	0	0	0	0	0	0	0	0	0	0	0	0	0	0	0	0
New.CleanUp.ReferenceOTU184240	0	0	0	0	0	0	0	0	0	0	0	0	0	0	0	0	0	0	0	0	0	0	0	0	0	0	0	0	0	0	0	0	0	0	0	0	0	0	0	0	0	0	0	0	0	0	0	0	0
972396	0	0	0	0	0	0	0	0	0	0	0	0	0	0	0	0	0	0	0	0	0	0	0	0	0	0	0	0	0	0	0	0	0	0	0	0	0	0	0	0	0	0	0	0	0	0	0	0	0
New.ReferenceOTU95	0	0	0	0	0	0	0	0	0	0	0	0	0	0	0	0	0	0	0	0	0	0	0	0	0	0	0	0	0	0	0	0	0	0	0	0	0	0	0	0	0	0	0	0	0	0	0	0	0
New.CleanUp.ReferenceOTU173399	0	0	0	0	0	0	0	0	0	0	0	0	0	0	0	0	0	0	0	0	0	0	0	0	0	0	0	0	0	0	0	0	0	0	0	0	0	0	0	0	0	0	0	0	0	0	0	0	0
New.ReferenceOTU550	0	0	0	0	0	0	0	0	0	0	0	0	0	0	0	0	0	0	0	0	0	0	0	0	0	0	0	32	0	0	0	0	0	0	0	0	3	0	0	0	0	0	0	0	0	0	0	0	0
1122375	0	0	0	0	0	0	0	0	0	0	0	0	0	0	0	0	0	0	0	0	0	0	0	0	0	0	0	0	0	0	0	0	0	0	0	0	0	0	0	0	0	0	0	0	0	0	0	0	0
4358404	0	0	0	0	0	0	0	0	0	0	0	0	0	0	0	0	0	0	0	0	0	0	0	0	0	0	0	0	0	0	0	0	0	0	0	0	0	0	0	0	0	0	0	0	0	0	0	0	0
New.CleanUp.ReferenceOTU112156	0	0	0	0	0	0	0	0	0	0	0	0	0	0	0	0	0	0	0	0	0	0	0	0	0	0	0	0	0	0	0	0	0	0	0	0	0	0	0	0	0	0	0	0	0	0	0	0	0
1031235	0	0	0	0	0	0	0	0	0	0	0	0	0	0	0	0	0	0	0	0	0	0	0	0	0	0	0	0	0	0	0	0	0	0	0	0	0	0	0	0	0	0	0	0	0	0	0	0	0
New.CleanUp.ReferenceOTU292024	0	0	0	0	0	0	0	0	0	0	0	0	0	0	0	0	0	0	0	0	0	0	0	0	0	0	0	0	0	0	0	0	0	0	0	0	0	0	0	0	0	0	0	0	0	0	0	0	0
New.CleanUp.ReferenceOTU47857	0	0	0	0	0	0	0	0	0	0	0	0	0	0	0	0	0	0	0	0	0	0	0	0	0	0	0	0	0	0	0	0	0	0	0	0	0	0	0	0	0	0	0	0	0	0	0	0	0
New.CleanUp.ReferenceOTU310789	0	0	0	0	0	0	0	0	0	0	0	0	0	0	0	0	0	0	0	0	0	0	0	0	0	0	0	0	0	0	0	0	0	0	0	0	0	0	0	0	0	0	0	0	0	0	0	0	0
New.CleanUp.ReferenceOTU275569	0	0	0	0	0	0	0	0	0	0	0	0	0	0	0	0	0	0	0	0	0	0	0	0	0	0	0	0	0	0	0	0	0	0	0	0	0	0	0	0	0	0	0	0	0	0	0	0	0
804828	0	0	0	0	0	0	0	0	0	0	0	0	0	0	0	0	0	0	0	0	0	0	0	0	0	0	0	0	0	0	0	0	0	0	0	0	0	0	0	0	0	0	0	0	0	0	0	0	0
319871	0	0	0	0	0	0	0	0	0	0	0	0	0	0	0	0	0	0	0	0	0	0	0	0	0	0	0	0	0	0	0	0	0	0	0	0	0	0	0	0	0	0	0	0	0	0	0	0	0
New.CleanUp.ReferenceOTU72727	0	9	0	0	0	4	0	0	0	0	0	0	0	0	0	0	0	0	0	0	0	0	0	0	0	0	0	0	0	0	0	0	0	0	0	0	0	0	0	0	0	0	0	0	0	0	0	0	0
New.CleanUp.ReferenceOTU247667	0	0	0	0	0	0	0	0	0	0	0	0	0	0	0	0	0	0	0	0	0	0	0	0	0	0	0	0	0	0	0	0	0	0	0	0	0	0	0	0	0	0	0	0	0	0	0	0	0
1041175	0	0	0	0	0	0	0	0	0	0	0	0	0	0	0	0	0	0	0	0	0	0	0	0	0	0	0	0	0	0	0	0	0	0	0	0	0	0	0	0	0	0	0	0	0	0	0	0	0
New.ReferenceOTU217	0	0	0	0	0	0	0	0	0	0	0	0	0	0	0	0	0	0	0	0	0	0	0	0	0	0	0	0	0	0	0	0	0	0	0	0	0	0	0	0	0	0	0	0	0	0	0	0	0
New.CleanUp.ReferenceOTU249542	0	0	0	0	0	0	0	0	0	0	0	0	0	0	0	0	0	0	0	0	0	0	0	0	0	0	0	0	0	0	0	0	0	0	0	0	0	0	0	0	0	0	0	0	0	0	0	0	0
New.CleanUp.ReferenceOTU201993	0	0	0	0	0	0	0	0	0	0	0	0	0	0	0	0	0	0	0	0	0	0	0	0	0	0	0	0	0	0	0	0	0	0	0	0	0	0	0	0	0	0	0	0	0	0	0	0	0
1014513	0	0	0	0	0	0	0	0	0	0	0	0	0	0	0	0	0	0	0	0	0	0	0	0	0	0	0	0	0	0	0	0	0	0	0	0	0	0	0	0	0	0	0	0	0	0	0	0	0
564911	0	0	0	0	0	0	0	0	0	0	0	0	0	0	0	0	0	0	0	0	0	0	0	0	0	0	0	0	0	0	0	0	0	0	0	0	0	0	0	0	0	0	0	0	0	0	0	0	0
New.CleanUp.ReferenceOTU101134	0	0	0	0	0	0	0	0	0	0	0	0	0	0	0	0	0	0	0	0	0	0	0	0	0	0	0	0	0	0	0	0	0	0	0	0	0	0	0	0	0	0	0	0	0	0	0	0	0
New.CleanUp.ReferenceOTU298673	0	0	0	0	0	0	0	0	0	0	0	0	0	0	0	0	0	0	0	0	0	0	0	0	0	0	0	0	0	0	0	0	0	0	0	0	0	0	0	0	0	0	0	0	0	0	0	6	0
New.CleanUp.ReferenceOTU117015	0	0	0	0	0	0	0	0	0	0	0	0	0	0	0	0	0	0	0	0	0	0	0	0	0	0	0	0	0	0	0	8	0	0	0	0	0	0	0	0	0	0	0	0	0	0	0	0	0
New.CleanUp.ReferenceOTU359636	0	0	0	0	0	0	0	0	0	0	0	0	0	0	0	0	0	0	0	0	0	0	0	0	0	0	0	0	0	0	0	0	0	0	0	0	0	0	0	0	0	0	0	0	0	0	0	0	0
New.CleanUp.ReferenceOTU261088	0	0	0	0	0	0	0	0	0	0	0	0	0	0	0	0	0	0	0	0	0	0	0	0	0	0	0	0	0	0	0	0	0	0	0	0	0	0	0	0	0	0	0	0	0	0	0	0	0
4334134	0	0	0	0	0	0	0	0	0	0	0	0	0	0	0	0	0	0	0	0	0	0	0	0	0	0	0	0	0	0	0	0	0	0	0	0	0	0	0	0	0	0	0	0	0	0	0	0	0
New.CleanUp.ReferenceOTU356174	0	0	0	0	0	0	0	0	0	0	0	0	0	0	0	0	0	0	0	0	0	0	0	0	0	0	0	0	0	0	0	0	0	0	0	0	0	0	0	0	0	0	0	0	0	0	0	0	0
New.CleanUp.ReferenceOTU77377	0	0	0	0	0	0	0	0	0	0	0	0	0	0	0	0	0	0	0	0	0	0	0	0	0	0	0	0	0	0	0	0	0	0	0	0	0	0	0	0	0	0	0	0	0	0	0	0	0
628299	0	75	10	0	0	137	0	0	0	8	0	0	17	215	1620	0	7	0	398	0	19	3	4	0	47	50	0	534	0	0	0	86	13	14	43	51	13	0	0	0	0	0	0	0	74	1139	0	208	0
252268	29	330	15	0	9	351	30	9	0	21	13	3	32	9131	4269	40	21	29	1879	13	1071	122	16	69	1023	195	30	1935	7	8	198	367	42	415	92	149	40	12	10	5	10	5	0	52	243	2161	49	672	5
4443003	0	12	0	0	0	55	0	0	0	0	0	0	0	0	0	0	0	0	0	0	0	3	0	0	0	4	0	0	0	0	0	0	54	0	8	3	0	0	0	0	4	3	0	0	4	0	0	24	0
4323373	0	0	0	0	0	0	0	0	0	0	0	0	0	0	0	0	0	0	0	0	0	0	0	0	0	0	0	0	0	0	0	0	0	0	0	0	0	0	0	0	0	0	0	0	0	0	0	0	0
4417972	0	18	0	0	0	31	0	0	0	0	0	0	0	7	223	0	0	0	43	0	0	0	0	0	0	3	0	66	0	0	0	11	0	0	7	6	0	0	0	0	0	0	0	0	11	174	0	37	0
4369142	0	0	0	0	0	0	0	0	0	0	0	0	0	0	0	0	0	0	0	0	0	0	0	0	0	0	0	0	0	0	0	0	35	0	0	0	0	0	0	0	0	0	0	0	0	0	0	0	0
4467949	0	0	0	0	0	0	0	0	0	0	0	0	0	0	0	0	0	0	0	0	0	0	0	0	0	0	0	0	0	0	0	0	0	0	0	0	0	0	0	0	0	0	0	0	0	0	0	0	0
4316436	0	0	0	0	0	0	0	4	38	0	0	0	0	0	0	48	0	65	0	3	0	0	0	0	4	0	9	0	0	0	16	0	31	31	0	0	0	0	0	0	0	3	0	0	0	0	6	10	0
New.ReferenceOTU628	0	3	0	0	0	0	0	0	0	0	0	0	0	0	112	0	0	0	0	0	0	0	0	0	0	0	0	11	0	0	0	0	0	0	0	0	0	0	0	0	0	0	0	0	13	19	0	21	0
New.ReferenceOTU74	0	0	0	0	0	0	0	0	0	0	0	0	0	0	0	0	0	0	0	0	0	0	0	0	0	0	0	0	0	0	0	0	0	0	0	0	0	0	0	0	0	0	0	0	0	0	0	0	0
New.ReferenceOTU668	0	0	0	0	0	0	0	0	0	0	0	0	0	0	0	0	0	0	0	0	0	0	0	0	0	0	0	0	0	0	0	0	9	0	0	0	0	0	0	0	0	0	0	0	0	0	0	0	0
527532	0	0	0	0	0	0	0	0	0	0	0	0	0	0	0	0	0	0	0	0	0	0	0	0	0	0	0	0	0	0	0	0	0	0	0	0	0	0	0	0	0	0	0	0	0	0	0	0	0
New.ReferenceOTU993	0	24	0	0	0	0	14	4	0	5	0	3	13	0	0	165	9	46	0	5	0	0	4	0	23	0	7	14	6	8	6	27	44	28	9	11	12	4	0	0	5	13	0	10	11	0	21	81	12
2806	0	0	0	0	0	0	0	0	0	0	0	0	0	0	0	0	0	0	0	0	0	0	0	0	0	0	0	0	0	0	0	0	0	0	0	0	0	0	0	0	0	0	0	0	0	0	0	9	0
529264	0	0	0	0	0	0	0	5	18	0	3	0	0	0	0	38	0	59	0	0	0	0	0	0	5	0	11	0	0	5	0	0	38	29	0	0	0	0	0	0	0	0	0	7	0	0	16	0	0
New.ReferenceOTU420	0	0	0	0	0	0	0	0	0	0	0	0	0	0	0	0	0	0	0	0	0	0	0	0	0	0	0	0	0	0	0	0	0	0	0	0	0	0	0	0	0	0	0	0	0	0	0	0	0
New.ReferenceOTU937	0	0	0	0	0	0	17	16	119	0	8	0	0	45	0	155	0	92	0	6	467	8	0	67	86	0	26	0	0	8	66	35	0	117	0	0	0	0	12	0	0	0	0	33	0	0	112	0	0
537953	0	0	0	0	0	0	0	0	0	0	0	0	0	0	0	0	0	0	0	0	0	0	0	0	0	0	0	0	0	0	0	0	0	0	0	0	0	0	0	0	0	0	0	0	0	0	0	0	0
New.ReferenceOTU8	0	0	0	0	0	0	0	0	0	0	0	0	0	0	0	0	0	0	0	0	0	0	0	0	0	0	0	0	0	0	0	0	0	0	0	0	0	0	0	0	0	0	0	0	0	0	0	0	0
New.ReferenceOTU120	7	0	0	0	0	0	5	0	0	0	0	0	0	623	0	3	0	0	0	0	0	7	0	0	40	0	3	0	0	0	24	0	0	8	0	0	0	0	0	0	0	0	0	5	0	0	0	0	0
New.ReferenceOTU1196	0	0	0	0	0	0	0	0	0	0	0	0	0	0	0	0	0	0	0	0	0	0	0	0	0	0	0	0	0	0	0	0	0	0	0	0	0	0	0	0	0	0	0	0	0	0	0	0	0
New.ReferenceOTU938	4	20	0	0	0	39	7	0	0	0	0	0	0	1617	0	0	0	0	433	0	336	15	0	0	83	0	0	3	0	0	30	19	0	68	6	0	0	0	0	0	0	0	0	3	7	198	0	21	0
New.ReferenceOTU133	0	0	0	0	0	0	0	0	0	0	0	0	0	0	0	0	0	0	0	0	0	0	0	0	0	0	0	0	0	0	0	0	0	0	0	0	0	0	0	0	0	0	0	0	0	0	0	0	0
New.ReferenceOTU339	0	0	0	0	0	0	0	0	0	0	0	0	0	0	0	0	0	0	0	0	0	0	0	0	0	0	0	0	0	0	0	0	0	0	0	0	0	0	0	0	0	0	0	0	0	0	0	0	0
New.ReferenceOTU40	0	0	0	0	0	0	0	0	0	0	0	0	0	0	0	0	0	0	0	0	0	0	0	0	0	0	0	0	0	0	0	0	0	0	0	0	0	0	0	0	0	0	0	0	0	0	0	0	0
3031461	0	12	0	0	0	0	0	0	0	0	0	0	3	0	0	0	0	0	0	0	0	0	0	0	0	0	0	0	0	0	0	19	0	0	0	0	7	4	0	0	0	0	0	0	0	0	0	9	0
New.ReferenceOTU291	0	13	0	0	0	29	0	0	0	0	0	0	3	0	228	0	0	0	40	0	0	0	0	0	0	6	0	71	0	0	0	7	3	0	6	10	4	0	0	0	0	0	0	0	10	155	0	37	0
New.ReferenceOTU603	0	0	0	0	0	0	0	0	0	0	0	0	0	0	0	0	0	0	0	0	0	0	0	0	0	0	0	7	0	0	0	6	0	0	4	0	0	0	0	0	0	0	0	0	0	0	0	10	0
387035	0	0	0	0	0	0	0	0	0	0	0	0	0	0	0	0	0	0	0	0	0	0	0	0	0	0	0	0	0	0	0	0	0	0	0	0	0	0	0	0	0	0	0	0	0	0	0	0	0
New.ReferenceOTU306	0	0	0	0	0	0	0	0	0	0	0	0	0	0	0	0	0	0	0	0	0	0	0	0	0	0	0	0	0	0	0	0	0	0	0	0	0	0	0	0	0	0	0	0	0	0	0	0	0
New.ReferenceOTU1029	0	22	0	0	0	33	0	8	72	20	0	0	0	0	0	40	5	119	0	0	15	0	5	0	10	6	0	0	0	13	0	0	48	16	0	7	0	18	4	0	5	0	0	19	8	21	19	29	0
579129	0	0	0	0	0	0	0	0	0	0	0	0	0	6	3	0	0	0	6	0	0	0	0	0	0	0	0	4	0	0	0	0	0	0	0	0	0	0	0	0	0	0	0	0	0	3	0	0	0
818320	0	0	0	0	0	0	0	0	0	0	0	0	0	0	0	0	0	0	0	0	0	0	0	0	0	0	0	0	0	0	0	0	0	0	0	0	0	0	0	0	0	0	0	0	0	0	0	0	0
2801	0	0	0	0	0	0	0	0	0	0	0	0	0	0	0	0	0	70	0	0	0	0	0	0	0	0	0	0	0	5	0	0	0	14	0	0	0	0	0	0	0	0	0	6	0	0	0	0	0
New.ReferenceOTU802	0	0	0	0	0	0	0	0	0	0	0	0	0	0	0	0	0	0	0	0	0	0	0	0	0	0	0	0	0	0	0	0	0	0	0	0	0	0	0	0	0	0	0	0	0	0	0	0	0
New.ReferenceOTU15	0	0	0	0	0	0	0	0	0	0	0	0	0	0	0	0	0	0	0	0	0	0	0	0	0	0	0	0	0	0	0	0	0	0	0	0	0	0	0	0	0	0	0	0	0	0	0	0	0
New.ReferenceOTU61	0	0	0	0	0	0	0	0	0	0	0	0	0	0	0	0	0	0	0	0	0	0	0	0	0	0	0	0	0	0	0	0	0	0	0	0	0	0	0	0	0	0	0	0	0	0	0	0	0
New.ReferenceOTU60	0	3	0	0	4	12	0	6	27	0	3	0	0	0	0	42	0	94	0	4	181	3	0	0	0	0	4	0	0	17	12	0	34	15	0	0	0	0	0	0	0	0	0	10	0	0	18	0	0
4423663	0	0	0	0	0	0	0	0	0	0	0	0	0	0	0	0	0	0	0	0	0	0	0	0	0	0	0	0	0	0	0	0	0	0	0	0	0	0	0	0	0	0	0	0	0	0	0	0	0
586939	0	0	0	0	0	0	0	0	0	0	0	0	0	0	0	0	0	0	0	0	0	0	0	0	0	0	0	0	0	0	0	0	0	0	0	0	0	0	0	0	0	0	0	0	0	0	0	0	0
552968	0	0	0	0	0	0	0	0	0	3	0	0	0	0	0	0	0	0	0	0	0	0	0	0	0	0	0	0	0	0	0	7	0	0	0	0	0	0	0	0	0	0	0	0	0	0	0	0	0
4437398	0	0	0	0	0	0	0	0	0	0	0	0	0	0	0	0	0	0	0	0	0	0	0	0	0	0	0	0	0	0	0	0	0	0	0	0	0	0	0	0	0	0	0	0	0	0	0	0	0
697799	0	11	0	0	0	0	0	0	0	0	0	0	0	115	0	4	0	12	0	0	0	0	0	0	41	0	0	0	0	0	20	0	71	22	0	18	0	0	0	0	0	3	0	25	0	0	8	18	0
New.ReferenceOTU630	0	0	0	0	0	0	0	0	0	0	0	0	0	0	0	0	0	0	0	0	0	0	0	0	0	0	0	0	0	0	0	0	0	0	0	0	0	0	0	0	0	0	0	0	0	0	0	0	0
New.CleanUp.ReferenceOTU247607	0	0	0	0	0	0	0	0	0	0	0	0	0	0	0	0	0	0	0	0	0	0	0	0	0	0	0	0	0	0	0	9	0	0	0	0	0	0	0	0	0	0	0	0	0	0	0	5	0
New.ReferenceOTU1075	0	7	0	0	0	0	0	0	0	0	0	0	0	0	0	0	6	0	0	0	0	0	0	0	5	0	0	311	0	0	0	192	0	0	0	0	0	0	0	0	0	0	0	0	0	0	0	8	0
New.ReferenceOTU707	0	0	0	0	0	0	0	0	0	0	0	0	0	0	0	0	0	0	0	0	0	0	0	0	0	0	0	0	0	0	0	0	0	0	0	0	0	0	0	0	0	0	0	0	0	0	0	0	0
658597	0	0	0	0	0	7	0	0	0	0	0	0	0	0	0	0	0	0	0	0	0	0	0	0	0	0	0	0	0	0	0	0	0	0	0	0	0	0	0	0	0	0	0	0	0	0	0	0	0
New.ReferenceOTU867	0	0	0	0	0	0	30	18	68	0	5	0	0	75	0	143	0	113	0	4	429	23	0	72	262	0	9	0	0	6	3	0	0	170	0	0	0	0	0	0	0	0	0	4	0	0	75	0	0
4374554	0	0	0	0	0	0	0	0	0	0	0	0	0	0	0	0	0	0	0	0	0	0	0	0	0	0	0	0	0	0	0	0	0	0	0	0	0	0	0	0	0	0	0	0	0	0	0	4	0
3327947	0	7	0	0	8	0	0	0	0	3	0	0	5	0	259	0	6	0	0	0	0	0	0	0	0	0	0	0	3	0	0	11	36	8	0	3	0	3	0	0	3	6	0	0	0	0	0	33	3
New.ReferenceOTU1090	0	0	0	0	0	0	0	0	0	0	0	0	0	0	0	0	0	0	0	0	0	0	0	0	0	0	0	0	0	0	0	0	0	0	0	0	0	0	0	0	0	0	0	0	0	0	0	0	0
New.ReferenceOTU143	0	0	0	0	0	0	0	0	0	0	0	0	0	0	0	0	0	0	0	0	0	0	0	0	0	0	0	0	0	0	0	0	0	0	0	0	0	0	0	0	0	0	0	0	0	0	0	0	0
441635	0	0	0	0	0	0	0	0	0	0	0	0	0	0	0	0	0	0	0	0	0	0	0	0	0	0	0	0	0	0	0	0	0	0	0	0	0	0	0	0	0	0	0	0	0	111	0	0	0
273690	0	0	0	0	0	0	0	0	0	0	0	0	0	0	0	0	0	0	0	0	0	0	0	0	0	0	0	0	0	0	0	0	0	0	0	8	0	0	0	0	0	0	0	0	0	0	0	0	0
New.ReferenceOTU296	0	0	0	0	0	0	0	0	0	0	0	0	0	0	0	0	0	0	0	0	0	0	0	0	0	0	0	0	0	0	0	0	0	0	0	0	0	0	0	0	0	0	0	0	0	0	0	0	0
2818	0	0	0	0	0	0	0	0	0	0	0	0	0	0	0	0	0	0	0	0	0	0	0	0	0	0	0	0	0	0	0	0	0	0	0	0	0	0	0	0	0	0	0	0	0	0	0	0	0
New.ReferenceOTU1072	0	0	0	0	0	0	0	0	0	0	0	0	0	0	0	0	0	0	0	0	0	0	0	0	0	0	0	0	0	0	0	0	0	0	0	0	0	0	0	0	0	0	0	0	0	0	0	0	0
509690	0	0	0	0	0	0	0	0	0	0	0	0	0	0	0	0	0	0	0	0	0	0	0	0	0	4	0	0	0	0	0	18	0	0	4	0	0	0	0	0	3	0	0	0	0	0	0	6	0
New.ReferenceOTU807	0	0	0	0	0	0	0	0	0	0	0	0	0	0	0	0	0	0	0	0	0	0	0	0	0	0	0	0	0	0	0	23	0	0	0	0	0	0	0	0	0	0	0	0	0	0	0	0	0
New.CleanUp.ReferenceOTU95161	0	0	0	0	0	0	0	0	0	0	0	0	0	0	0	0	0	0	0	0	0	0	0	0	0	0	0	0	0	0	0	0	0	0	0	0	0	0	0	0	0	0	0	0	0	0	0	0	0
4382847	0	0	0	0	0	0	0	0	0	0	0	0	0	0	0	0	0	0	0	0	0	0	0	0	0	0	0	0	0	0	0	9	0	0	0	5	6	0	0	0	0	0	0	0	0	0	0	0	0
New.ReferenceOTU34	0	9	0	0	3	0	4	0	0	0	0	0	5	0	0	56	3	29	0	3	0	3	0	0	0	0	0	8	4	3	8	13	38	5	0	5	7	3	0	0	3	4	0	0	14	0	7	41	0
3251538	0	14	0	0	0	0	0	0	0	0	0	0	5	0	0	0	0	0	0	0	0	0	0	0	0	0	0	83	0	0	0	33	0	0	3	13	4	0	0	0	3	6	0	0	20	281	0	86	0
New.ReferenceOTU898	0	0	0	0	0	10	0	0	0	0	0	0	0	0	0	0	0	0	0	0	0	0	0	0	0	0	0	61	0	0	0	8	0	0	0	0	0	0	0	0	0	0	0	0	0	0	0	0	0
2905448	0	8	0	0	4	10	0	0	0	4	0	0	3	0	0	0	11	0	122	0	0	0	0	0	0	4	0	38	3	0	0	19	4	0	0	3	0	8	0	0	3	14	0	0	32	0	0	192	0
New.ReferenceOTU805	0	0	0	0	0	24	4	0	0	0	4	0	0	0	0	16	0	27	0	0	0	0	0	0	14	0	0	0	0	4	13	24	0	74	0	0	0	0	0	0	0	0	0	0	0	323	16	15	0
New.CleanUp.ReferenceOTU250839	0	0	0	0	0	0	0	0	0	0	0	0	0	0	0	0	0	0	0	0	0	0	0	0	0	0	0	0	0	0	0	0	0	0	0	0	0	0	0	0	0	0	0	0	0	0	0	0	0
New.CleanUp.ReferenceOTU323125	0	0	0	0	0	0	0	0	0	0	0	0	0	0	0	0	0	0	0	0	0	0	0	0	0	0	0	0	0	0	0	0	0	0	0	0	0	0	0	0	0	0	0	0	0	0	0	0	0
New.ReferenceOTU179	0	0	0	0	0	0	0	0	0	0	0	0	0	0	0	0	0	0	0	0	0	0	0	0	0	0	0	0	0	0	0	0	0	0	0	0	0	0	0	0	0	0	0	0	0	0	0	0	0
323488	13	0	0	0	0	0	0	3	0	0	0	0	0	130	0	25	0	23	0	0	0	0	0	0	0	0	0	0	0	3	5	0	11	18	0	0	0	0	0	0	0	0	0	0	0	0	9	0	0
560205	0	0	0	0	0	0	0	0	0	0	0	0	0	0	0	0	0	0	0	0	0	0	0	0	0	0	0	0	0	0	0	0	0	0	0	0	0	0	0	0	0	0	0	0	0	0	0	0	0
903224	0	6	0	0	0	0	0	0	0	0	0	0	3	0	0	0	4	0	0	0	0	0	3	0	0	0	0	0	0	0	0	3	8	0	0	0	0	0	0	0	3	3	0	0	3	0	0	11	4
New.ReferenceOTU1187	0	0	0	0	0	0	0	0	0	0	0	0	0	0	0	0	0	0	0	0	0	0	0	0	0	0	0	83	0	0	0	0	0	0	0	0	0	0	0	0	0	0	0	0	0	0	0	14	0
New.CleanUp.ReferenceOTU281887	0	0	0	0	0	0	0	0	0	0	0	0	0	0	0	0	0	0	0	0	0	0	0	0	0	0	0	0	0	0	0	0	0	0	0	0	0	0	0	0	0	0	0	0	9	0	0	19	0
New.ReferenceOTU730	6	0	0	0	0	0	0	4	20	0	6	0	0	12	0	82	0	88	0	0	54	0	0	25	7	0	8	0	0	6	60	0	0	39	0	0	0	0	0	0	0	0	0	17	0	0	23	0	0
New.ReferenceOTU207	0	0	0	0	0	0	0	0	0	0	0	0	0	0	0	0	0	0	0	0	0	0	0	0	0	0	0	0	0	0	0	0	0	0	0	0	0	0	0	0	0	0	0	0	0	0	0	0	0
563596	0	0	0	0	0	0	0	0	0	0	0	0	0	0	0	0	0	0	0	0	0	0	0	0	0	0	0	0	0	0	0	0	0	0	0	0	0	0	0	0	0	0	0	0	0	0	0	0	0
New.ReferenceOTU1055	0	3	0	0	5	0	0	0	0	10	0	0	6	0	0	7	0	3	0	0	0	0	0	0	0	0	0	0	3	0	3	0	17	0	0	0	4	5	0	0	0	3	0	0	4	0	0	30	0
New.ReferenceOTU318	0	0	0	0	0	0	0	0	0	0	0	0	0	0	0	0	0	0	0	0	0	0	0	0	0	0	0	0	0	0	0	0	0	0	0	0	0	0	0	0	0	0	0	0	0	0	0	0	0
New.CleanUp.ReferenceOTU149786	0	0	0	0	0	0	0	0	0	3	0	0	0	0	0	0	0	0	0	0	0	0	0	0	0	0	0	0	0	0	0	0	0	0	0	0	0	0	0	0	0	0	0	0	0	0	0	8	0
2006401	0	0	0	0	0	0	0	0	0	0	0	0	0	0	0	0	0	0	0	0	0	0	0	0	0	0	0	0	0	0	0	0	0	0	0	0	0	0	0	0	0	0	0	0	0	0	0	0	0
New.CleanUp.ReferenceOTU38866	0	5	0	0	0	26	0	0	0	4	0	0	0	0	0	0	0	0	0	0	0	0	0	0	0	0	0	0	0	0	0	5	14	0	0	0	0	0	0	0	0	0	0	0	9	0	0	36	0
New.CleanUp.ReferenceOTU267755	0	0	0	0	0	0	0	0	0	0	0	0	0	0	0	0	0	0	0	0	0	0	0	0	0	0	0	0	0	0	0	0	0	0	0	0	0	0	0	0	0	0	0	0	0	0	0	0	0
240019	0	0	0	0	0	0	0	0	0	0	0	0	0	0	0	0	0	0	0	0	0	0	0	0	0	0	0	470	0	0	0	27	4	0	0	0	0	0	0	0	0	0	0	0	0	0	0	0	0
New.CleanUp.ReferenceOTU9587	0	0	0	0	0	0	0	0	0	0	0	0	0	0	0	0	0	0	0	0	0	0	0	0	0	0	0	0	0	0	0	0	0	0	0	0	0	0	0	0	0	0	0	0	0	0	0	0	0
New.ReferenceOTU115	0	0	0	0	0	0	0	0	0	16	0	0	0	0	0	17	0	29	0	0	0	0	0	0	0	0	0	0	0	0	0	26	54	4	5	0	0	0	3	0	0	7	0	4	0	0	3	19	0
New.CleanUp.ReferenceOTU176961	0	0	0	0	0	0	0	0	0	0	0	0	0	0	0	0	0	0	0	0	0	0	0	0	0	0	0	0	0	0	0	0	0	0	0	0	0	0	0	0	0	0	0	0	0	0	0	0	0
New.CleanUp.ReferenceOTU331204	0	0	0	0	0	0	0	0	0	0	0	0	0	0	0	0	0	0	0	0	0	0	0	0	0	0	0	0	0	0	0	0	0	0	0	0	0	0	0	0	0	0	0	0	0	0	0	0	0
3954606	0	0	0	0	0	0	0	0	0	0	0	0	0	0	0	0	0	0	0	0	0	0	0	0	0	0	0	0	0	0	0	0	0	0	0	0	0	0	0	0	0	0	0	0	0	0	0	0	0
New.ReferenceOTU1190	0	0	0	0	0	17	0	0	0	0	0	0	0	0	0	0	0	0	0	0	0	0	0	0	0	0	0	0	0	0	0	0	13	0	0	0	0	0	0	0	0	0	0	0	0	0	0	0	0
New.ReferenceOTU671	0	6	0	0	3	0	0	0	20	7	0	0	0	0	0	3	0	7	0	0	0	0	0	0	18	0	0	0	0	0	0	0	5	9	0	0	0	0	0	0	4	0	0	0	0	297	5	26	0
New.ReferenceOTU155	0	7	0	0	3	6	0	0	0	3	0	0	0	0	0	0	9	0	0	0	0	0	3	0	0	0	0	0	3	0	0	14	13	5	5	9	0	4	0	0	0	0	0	0	0	0	0	3	0
New.CleanUp.ReferenceOTU242210	0	8	0	0	0	17	0	0	0	0	0	0	10	0	0	0	0	0	0	0	0	0	3	0	0	0	0	235	0	0	0	16	0	0	0	15	8	0	0	0	0	0	0	0	5	0	0	53	0
2793	0	0	0	0	0	9	0	0	0	0	0	0	0	0	0	7	0	16	0	0	0	0	0	0	13	0	3	0	0	0	7	6	6	23	0	0	0	0	0	0	0	0	0	3	0	124	7	3	0
4374555	0	0	0	0	0	0	0	0	0	0	0	0	0	0	0	0	0	0	0	0	0	0	0	0	0	0	0	30	0	0	0	0	33	5	0	8	0	0	0	0	0	0	0	0	0	0	0	6	0
583343	0	0	0	0	0	0	0	0	0	0	0	0	0	0	0	0	0	0	0	0	0	0	0	0	0	0	0	0	0	0	0	0	18	0	0	0	0	0	0	0	0	0	0	0	0	0	0	0	0
New.ReferenceOTU692	0	3	0	0	0	78	0	0	0	0	0	0	0	0	0	0	0	0	0	0	0	0	0	0	0	0	0	0	0	0	0	58	34	0	9	0	0	0	0	0	0	0	0	0	5	0	0	23	0
4437174	0	0	0	0	0	0	0	0	0	0	0	0	0	0	0	0	0	0	0	0	0	0	0	0	0	0	0	0	0	0	0	0	0	3	0	0	0	0	0	0	0	0	0	0	0	0	0	0	0
New.CleanUp.ReferenceOTU189893	0	13	0	0	0	0	0	0	0	0	0	0	6	0	0	0	6	0	0	0	0	0	4	0	0	0	0	161	0	0	0	60	0	0	0	27	20	0	0	0	3	3	0	0	19	0	0	67	0
New.ReferenceOTU884	0	0	0	0	0	0	0	0	0	0	0	0	0	0	0	0	0	0	0	0	0	0	0	0	0	0	0	0	0	0	0	0	0	0	0	0	0	0	0	0	0	0	0	0	0	0	0	0	0
New.ReferenceOTU286	0	7	0	0	0	0	0	0	0	0	0	0	0	0	0	0	0	3	0	0	0	0	0	0	0	0	0	0	0	0	0	4	18	0	0	0	0	0	0	0	0	0	0	0	0	217	0	25	0
New.ReferenceOTU939	0	0	0	0	0	0	0	0	0	0	0	0	0	0	0	0	0	0	0	0	0	0	0	0	0	0	0	0	0	0	0	0	0	0	0	0	0	0	0	0	0	0	0	0	0	0	0	0	0
New.ReferenceOTU162	0	0	0	0	0	0	0	0	0	0	0	0	0	0	0	0	0	0	0	0	0	0	0	0	0	0	0	0	0	0	0	0	0	0	0	0	0	0	0	0	0	0	0	0	0	0	0	0	0
New.CleanUp.ReferenceOTU310394	0	0	0	0	0	0	0	0	0	0	0	0	0	0	0	0	0	0	0	0	0	0	0	0	0	0	0	0	0	0	0	0	0	0	0	0	0	0	0	0	0	0	0	0	0	0	0	0	0
609008	0	0	0	0	0	0	0	0	0	0	0	0	0	0	0	0	0	0	0	0	0	0	0	0	0	0	0	0	0	0	0	0	3	0	0	0	0	0	0	0	0	0	0	0	0	0	0	0	0
1106707	0	0	0	0	0	0	0	0	0	0	0	0	0	0	0	0	0	0	0	0	0	0	0	0	0	0	0	87	0	0	0	3	0	0	0	0	0	0	0	0	0	0	0	0	0	0	0	5	0
New.CleanUp.ReferenceOTU332557	0	0	0	0	0	0	0	0	0	0	0	0	0	0	0	0	0	0	0	0	0	0	0	0	0	0	0	0	0	0	0	0	0	0	0	0	0	0	0	0	0	0	0	0	0	0	0	0	0
New.CleanUp.ReferenceOTU117545	0	0	0	0	0	0	0	0	0	0	0	0	0	0	0	0	0	0	0	0	0	0	0	0	0	0	0	0	0	0	0	0	0	0	0	0	0	0	0	0	0	0	0	0	0	0	0	0	0
New.CleanUp.ReferenceOTU268716	0	0	0	0	0	0	0	0	0	0	0	0	0	0	0	0	0	0	0	0	0	0	0	0	0	0	0	0	0	0	0	0	0	0	0	0	0	0	0	0	0	0	0	0	0	0	0	0	0
New.CleanUp.ReferenceOTU65752	0	0	0	0	0	0	0	0	0	0	0	0	0	0	0	0	0	0	0	0	0	0	0	0	0	0	0	0	0	0	0	0	0	0	0	0	0	0	0	0	0	0	0	0	0	0	0	0	0
New.CleanUp.ReferenceOTU235935	0	3	0	0	0	0	0	0	0	0	0	0	0	0	0	0	3	0	0	0	0	0	0	0	0	0	0	44	0	0	0	14	0	0	6	0	0	0	0	0	0	0	0	0	4	79	0	35	0
New.CleanUp.ReferenceOTU181076	0	12	0	0	0	0	0	0	0	0	0	0	0	0	0	0	0	8	0	0	0	0	0	0	3	0	4	0	0	0	0	7	8	0	0	0	0	0	0	0	0	0	0	0	0	0	4	28	0
New.CleanUp.ReferenceOTU148323	0	0	0	0	0	0	0	0	0	0	0	0	0	0	0	0	0	0	0	0	0	0	0	0	0	0	0	0	0	0	0	0	0	0	0	0	0	0	0	0	0	0	0	0	0	0	0	0	0
566185	0	0	0	0	0	0	0	0	0	0	0	0	0	0	0	0	0	0	0	0	0	0	0	0	0	0	0	0	0	0	0	0	26	0	0	0	0	0	0	0	0	0	0	0	0	0	0	0	0
New.CleanUp.ReferenceOTU55211	0	0	0	0	0	0	0	0	0	0	0	0	0	0	0	0	0	0	0	0	0	0	0	0	0	0	0	0	0	0	0	0	0	0	0	0	0	0	0	0	0	0	0	0	0	0	0	0	0
New.ReferenceOTU766	0	0	0	0	0	0	3	0	0	0	0	0	0	0	0	6	0	30	0	0	0	3	0	8	74	0	0	0	0	3	6	0	0	73	0	0	4	0	0	0	0	0	0	6	0	0	16	0	0
New.CleanUp.ReferenceOTU192657	0	3	0	0	0	0	0	0	0	0	0	0	0	0	0	0	0	23	0	0	0	0	0	0	0	0	0	0	0	0	0	0	17	0	0	0	0	0	0	0	0	0	0	0	0	0	0	17	0
New.ReferenceOTU59	0	0	0	0	0	27	0	0	0	0	0	0	0	0	0	0	0	0	0	0	0	0	0	0	0	0	0	107	0	0	0	0	0	0	0	0	3	0	0	0	0	0	0	0	0	0	0	0	0
New.CleanUp.ReferenceOTU47405	0	0	0	0	0	0	0	0	0	0	0	0	0	0	0	0	4	0	0	0	0	0	0	0	0	0	0	0	0	0	0	0	3	0	0	4	0	0	0	0	0	0	0	0	0	0	0	0	0
New.ReferenceOTU911	0	0	0	0	0	0	0	0	0	0	0	0	0	0	0	0	0	0	0	0	0	0	0	0	0	0	0	0	0	0	0	0	0	0	0	0	0	0	0	0	0	0	0	0	0	0	0	0	0
New.ReferenceOTU305	0	4	0	0	0	6	0	0	0	0	0	0	0	0	0	0	0	0	0	0	0	0	0	0	0	0	0	22	0	0	0	13	0	0	3	0	4	0	0	0	0	0	0	0	0	188	0	10	4
3534838	0	0	0	0	0	0	0	0	0	0	0	0	0	0	0	0	0	0	0	0	0	0	0	0	0	0	0	0	0	0	0	0	0	0	0	0	0	0	0	0	0	0	0	0	0	0	0	0	0
New.ReferenceOTU132	0	0	0	0	0	0	0	0	0	0	0	0	0	0	0	0	0	0	0	0	0	0	0	0	0	0	0	0	0	0	0	0	0	0	0	0	0	0	0	0	0	0	0	0	0	0	0	0	0
New.ReferenceOTU597	0	0	0	0	0	0	0	0	0	0	0	0	0	0	0	0	0	0	0	0	0	0	0	0	0	0	0	0	0	0	0	0	0	0	0	0	0	0	0	0	0	0	0	0	0	0	0	0	0
New.ReferenceOTU231	0	0	0	0	0	0	0	0	0	0	0	0	0	0	0	0	0	0	0	0	0	0	0	0	0	0	0	0	0	0	0	0	0	0	0	0	0	0	0	0	0	0	0	0	0	0	0	0	0
535989	0	0	0	0	0	0	0	0	0	0	0	0	0	0	0	0	0	0	0	0	0	0	0	0	0	0	0	0	0	0	0	5	0	0	0	0	0	0	0	0	0	0	0	0	0	0	0	4	0
New.CleanUp.ReferenceOTU224798	0	0	0	0	0	0	0	3	0	0	0	0	0	0	0	3	0	117	0	0	0	0	0	0	10	0	0	0	0	4	4	0	0	35	0	0	0	0	0	0	0	0	0	5	0	0	20	0	0
1848080	0	0	0	0	0	0	0	0	0	0	0	0	0	0	0	7	3	0	0	0	0	3	0	0	7	0	3	0	0	0	0	5	4	0	0	0	3	0	0	0	0	0	0	0	0	0	13	13	0
New.ReferenceOTU947	0	0	0	0	0	3	0	0	0	0	0	0	0	0	0	0	0	0	0	0	0	0	0	0	0	0	0	0	0	0	0	0	0	0	0	0	0	0	0	0	0	0	0	0	0	0	0	0	0
4483959	0	0	0	0	0	0	0	0	0	0	0	0	0	0	0	0	0	0	0	0	0	0	0	0	0	0	0	0	0	0	0	0	0	0	0	0	0	0	0	0	0	0	0	0	0	0	0	0	0
New.ReferenceOTU246	0	0	0	0	0	0	0	0	0	0	0	0	0	0	0	0	0	0	0	0	0	0	0	0	0	0	0	0	0	0	0	0	0	0	0	0	0	0	0	0	0	0	0	0	0	0	0	0	0
1646924	0	0	0	0	0	0	0	0	0	0	0	0	0	0	0	0	3	0	0	0	0	0	0	0	0	0	0	0	0	0	0	0	0	0	0	3	7	0	0	0	0	0	0	0	0	0	0	0	0
New.CleanUp.ReferenceOTU202582	0	0	0	0	0	0	0	0	0	0	0	0	0	0	0	0	0	0	0	0	0	0	0	0	0	0	0	0	0	0	0	0	0	0	0	0	0	0	0	0	0	0	0	0	0	0	0	0	0
4367288	0	0	0	0	0	0	0	0	0	0	0	0	0	0	0	0	0	0	0	0	0	0	0	0	0	0	0	0	0	0	0	0	0	0	0	0	0	0	0	0	0	0	0	0	0	0	0	0	0
New.ReferenceOTU1054	0	0	0	0	0	0	0	0	0	0	0	0	0	142	0	0	0	0	0	0	31	0	0	0	6	0	0	0	0	0	0	0	0	5	0	0	0	0	0	0	0	0	0	0	0	0	0	0	0
New.CleanUp.ReferenceOTU177448	0	0	0	0	0	0	0	0	0	0	0	0	0	0	0	0	0	0	0	0	0	0	0	0	0	0	0	0	0	0	0	0	0	0	0	0	0	0	0	0	0	0	0	0	0	254	0	0	0
New.CleanUp.ReferenceOTU258488	0	0	0	0	0	0	0	0	0	0	0	0	0	0	0	0	0	0	0	0	0	0	0	0	0	0	0	0	0	0	0	0	0	0	0	0	0	0	0	0	0	0	0	0	0	0	0	0	0
New.ReferenceOTU763	0	0	0	0	0	0	0	0	0	0	0	0	0	0	0	0	0	0	0	0	0	0	0	0	0	0	0	0	0	0	0	0	0	0	0	0	0	0	0	0	0	0	0	0	0	0	0	0	0
New.CleanUp.ReferenceOTU62709	0	0	0	0	0	0	0	0	0	0	0	0	0	0	0	0	0	0	0	0	0	0	0	0	0	0	0	0	0	0	0	0	0	0	0	0	0	0	0	0	0	0	0	0	0	0	0	0	0
New.CleanUp.ReferenceOTU134925	0	0	0	0	0	0	0	0	0	0	0	0	0	0	0	0	0	0	0	0	0	0	0	0	0	0	0	0	0	0	0	0	0	0	0	0	0	0	0	0	0	0	0	0	0	0	0	0	0
New.CleanUp.ReferenceOTU245876	0	0	0	0	0	0	0	0	0	0	0	0	0	0	0	0	0	0	0	0	0	0	0	0	0	0	0	0	0	0	0	0	0	0	0	0	0	0	0	0	0	0	0	0	0	0	0	0	0
New.CleanUp.ReferenceOTU168437	0	0	0	0	0	0	0	0	0	0	0	0	0	0	0	0	0	0	0	0	0	0	0	0	0	0	0	0	0	0	0	0	0	0	0	0	0	0	0	0	0	0	0	0	0	0	0	0	0
New.ReferenceOTU663	0	0	0	0	0	0	0	0	0	0	0	0	0	0	0	0	0	0	0	0	0	0	0	0	0	0	0	0	0	0	0	0	0	0	0	0	0	0	0	0	0	0	0	0	0	0	0	9	0
704095	0	0	0	0	0	0	0	0	0	0	0	0	0	0	0	0	0	0	0	0	0	0	0	21	0	0	0	0	0	0	0	0	0	3	0	0	0	0	0	0	0	0	0	0	0	0	0	0	0
New.ReferenceOTU542	0	0	0	0	0	0	0	0	0	0	0	0	0	0	0	0	0	0	0	0	0	0	0	0	0	0	0	0	0	0	0	0	0	0	0	0	0	0	0	0	0	0	0	0	0	0	0	0	0
New.CleanUp.ReferenceOTU156584	0	8	0	0	5	0	0	0	0	0	0	0	0	0	0	0	0	0	0	0	0	0	0	0	0	0	0	0	3	0	0	0	9	0	0	6	0	5	0	0	0	0	0	0	0	0	0	0	0
New.CleanUp.ReferenceOTU249228	0	0	0	0	0	0	0	0	0	0	0	0	0	0	0	0	0	0	0	0	0	0	0	0	0	0	0	54	0	0	0	19	0	0	0	0	0	0	0	0	0	0	0	0	0	103	0	8	0
New.CleanUp.ReferenceOTU90669	0	0	0	0	0	0	0	0	0	0	0	0	0	0	0	0	0	0	0	0	0	0	0	0	0	0	0	0	0	0	0	0	0	0	0	0	0	0	0	0	0	0	0	0	0	0	0	0	0
3478700	0	0	0	0	0	0	0	0	0	0	0	0	0	0	0	0	0	0	0	0	0	0	0	0	0	0	0	0	0	0	0	0	0	0	0	0	0	0	0	0	0	0	0	0	0	0	0	0	0
New.CleanUp.ReferenceOTU278258	0	0	0	0	0	0	0	0	0	0	0	0	0	0	0	0	0	8	0	0	0	0	0	0	0	0	0	0	0	0	0	0	0	0	0	0	0	0	0	0	0	0	0	3	0	0	0	10	0
4404066	0	0	0	0	0	0	0	0	0	0	0	0	0	0	0	0	0	3	0	0	194	0	0	0	12	0	0	0	0	0	0	0	0	0	0	0	0	0	0	0	0	0	0	0	0	0	0	0	0
New.ReferenceOTU801	0	0	0	0	0	0	0	0	0	0	0	0	0	0	0	0	0	0	0	0	0	0	0	0	0	0	0	0	0	0	0	0	0	0	0	0	0	0	0	0	0	0	0	0	0	0	0	0	0
New.CleanUp.ReferenceOTU12431	0	0	0	0	0	0	0	0	0	0	0	0	0	0	0	0	0	0	0	0	0	0	0	0	0	0	0	0	0	0	0	0	0	0	0	0	0	0	0	0	0	0	0	0	0	0	0	0	0
New.CleanUp.ReferenceOTU91945	0	0	0	0	0	0	0	0	0	0	0	0	0	0	0	0	0	0	0	0	0	0	0	0	0	0	0	0	0	0	0	11	0	0	0	0	0	0	0	0	0	0	0	0	0	0	0	5	0
2850546	0	0	0	0	0	0	0	0	0	0	0	0	0	0	0	0	0	0	0	0	0	0	0	0	0	0	0	0	0	0	0	0	0	0	0	0	0	0	0	0	0	0	0	0	0	0	0	0	0
New.CleanUp.ReferenceOTU55516	0	0	0	0	0	0	0	0	0	0	0	0	0	0	0	0	0	0	0	0	0	0	0	0	0	0	0	0	0	0	0	0	0	0	0	0	0	0	0	0	0	0	0	0	0	0	0	0	0
New.CleanUp.ReferenceOTU304431	0	0	0	0	0	0	0	0	0	0	0	0	0	0	0	0	0	3	0	0	0	0	0	54	0	0	0	0	0	0	0	0	26	0	0	0	0	0	0	0	0	0	0	6	0	0	0	0	0
New.ReferenceOTU428	0	0	0	0	0	0	0	0	0	0	0	0	0	0	0	0	0	0	0	0	0	0	0	0	0	0	0	0	0	0	0	0	0	0	0	0	0	0	0	0	0	0	0	0	0	0	0	0	0
New.CleanUp.ReferenceOTU156201	0	0	0	0	0	0	0	0	0	0	0	0	0	0	0	0	0	0	0	0	0	0	0	0	0	0	0	0	0	0	0	0	0	0	0	0	0	0	0	0	0	0	0	0	0	0	0	0	0
New.CleanUp.ReferenceOTU118988	0	0	0	0	0	0	0	0	0	4	0	0	0	0	0	0	7	0	0	0	0	0	0	0	0	0	0	0	0	0	0	0	0	0	0	0	0	0	0	0	0	0	0	0	0	0	0	4	0
1124436	0	0	0	0	0	0	0	0	0	0	0	0	0	0	0	0	0	0	0	0	0	0	0	0	0	0	0	0	0	0	0	0	0	0	0	0	0	0	0	0	0	0	0	0	0	0	0	0	0
New.CleanUp.ReferenceOTU298129	0	0	0	0	0	0	0	0	0	0	0	0	0	0	0	0	0	0	0	0	0	0	0	0	0	0	0	0	0	0	0	0	0	0	0	0	0	0	0	0	0	0	0	0	0	0	0	0	0
New.CleanUp.ReferenceOTU336386	0	0	0	0	0	0	0	0	0	0	0	0	0	0	0	0	0	0	0	0	0	0	0	0	0	0	0	0	0	0	0	0	0	0	0	0	0	0	0	0	0	0	0	0	0	0	0	0	0
New.CleanUp.ReferenceOTU135134	0	0	0	0	0	0	0	0	0	0	0	0	0	0	0	0	0	0	0	0	0	0	0	0	0	0	0	0	0	0	0	0	0	0	0	0	0	0	0	0	0	0	0	0	0	0	0	0	0
New.CleanUp.ReferenceOTU170300	0	0	0	0	0	0	0	0	0	0	0	0	0	0	0	0	0	0	0	0	0	0	0	0	0	0	0	0	0	0	0	0	0	0	0	0	0	0	0	0	0	0	0	0	0	0	0	0	0
New.CleanUp.ReferenceOTU287376	0	0	0	0	0	0	0	0	0	0	0	0	0	0	0	0	0	0	0	0	0	0	0	0	0	0	0	0	0	0	0	0	0	0	0	0	0	0	0	0	0	0	0	0	0	0	0	0	0
New.CleanUp.ReferenceOTU85309	0	0	0	0	0	0	0	0	0	0	0	0	0	0	0	0	0	0	0	0	0	0	0	0	0	0	0	0	0	0	0	0	0	0	0	0	0	0	0	0	0	0	0	0	0	0	0	0	0
New.CleanUp.ReferenceOTU175093	0	0	0	0	0	0	0	0	0	0	0	0	0	0	0	0	0	0	0	0	0	0	0	0	0	0	0	0	0	0	0	0	0	0	0	0	0	0	0	0	0	0	0	0	0	0	0	0	0
669338	0	0	0	0	0	0	0	0	0	0	0	0	0	0	0	0	0	0	0	0	0	0	0	0	0	0	0	0	0	0	0	0	0	0	0	0	0	0	0	0	0	0	0	0	0	0	0	0	0
New.CleanUp.ReferenceOTU204788	0	0	0	0	0	53	0	0	0	0	0	0	0	59	0	0	0	0	0	0	0	0	0	0	0	0	0	0	0	0	0	10	0	0	0	0	0	0	0	0	0	0	0	6	0	0	0	0	0
New.CleanUp.ReferenceOTU278207	3	0	0	0	0	0	0	0	73	0	0	0	0	0	0	27	0	4	0	0	0	0	0	0	0	0	0	0	0	0	9	0	0	44	0	0	0	0	0	0	0	0	0	0	0	0	8	0	0
New.CleanUp.ReferenceOTU293661	0	0	0	0	0	0	0	0	0	0	0	0	0	0	0	0	0	0	0	0	0	0	0	0	0	0	0	0	0	0	0	0	0	0	0	0	0	0	0	0	0	0	0	0	0	0	0	0	0
529067	0	0	0	0	0	0	0	0	0	0	0	0	0	0	0	0	0	0	0	0	0	0	0	0	0	0	0	0	0	0	0	0	0	0	0	0	0	0	0	0	0	0	0	0	0	0	0	0	0
4391201	0	4	0	0	0	0	0	0	0	0	0	0	0	0	0	20	3	6	0	0	0	5	0	0	7	0	0	0	0	0	0	8	4	3	0	0	0	0	3	0	0	0	0	0	0	0	3	11	0
3703609	0	0	0	0	0	0	0	0	0	0	0	0	0	0	0	0	0	0	0	0	0	0	0	0	0	0	0	0	0	0	0	0	0	0	0	0	0	0	0	0	0	0	0	0	0	0	0	0	0
558165	0	0	0	0	0	0	0	0	0	0	0	0	0	0	0	0	0	0	0	0	0	0	0	0	0	0	0	0	0	0	0	0	0	0	0	0	0	0	0	0	0	0	0	0	0	0	0	10	0
New.CleanUp.ReferenceOTU107381	0	0	0	0	0	0	0	0	28	0	0	0	0	0	0	0	3	0	0	0	0	0	0	0	0	0	0	0	0	0	0	3	0	3	0	0	3	0	0	0	0	0	0	0	3	0	0	5	0
2618266	0	0	0	0	0	0	0	0	0	0	0	0	0	0	0	0	0	0	0	0	0	0	0	0	0	0	0	48	0	0	0	0	0	3	0	3	0	0	0	0	0	0	0	0	0	0	0	0	0
New.CleanUp.ReferenceOTU267011	0	0	0	0	0	0	0	0	0	0	0	0	0	0	0	0	0	0	0	0	0	0	0	0	0	0	0	0	0	0	0	0	0	0	0	0	0	0	0	0	0	0	0	0	0	0	0	0	0
New.CleanUp.ReferenceOTU101054	0	0	0	0	0	32	0	0	0	0	0	0	0	0	0	0	0	0	0	0	0	0	0	0	0	0	0	10	0	0	0	82	0	0	0	0	0	0	0	0	0	0	0	0	0	0	0	4	0
New.CleanUp.ReferenceOTU333092	0	0	0	0	0	0	0	0	0	0	0	0	0	0	0	0	0	0	0	0	0	0	0	0	0	0	0	0	0	0	0	0	0	0	0	0	0	0	0	0	0	0	0	0	0	0	0	0	0
New.CleanUp.ReferenceOTU130970	0	0	0	0	0	0	0	0	0	0	0	0	0	0	0	0	0	0	0	0	0	0	0	0	0	0	0	70	0	0	0	12	0	0	0	0	0	0	0	0	0	0	0	0	0	0	0	3	0
New.CleanUp.ReferenceOTU32958	0	0	0	0	0	0	0	0	0	0	0	0	0	0	0	0	0	0	0	0	0	0	0	0	0	0	0	0	0	0	0	0	0	0	0	0	0	0	0	0	0	0	0	0	0	0	0	0	0
New.CleanUp.ReferenceOTU54281	0	7	0	0	0	0	0	0	0	6	0	0	0	0	0	0	0	0	0	0	0	0	6	0	0	0	0	0	0	0	0	0	0	0	0	15	12	0	0	0	0	0	0	0	0	0	0	0	0
4396309	0	0	0	0	0	7	0	0	0	0	0	0	0	0	0	0	0	0	0	0	0	0	0	0	0	0	0	0	0	0	0	0	10	0	0	0	0	0	0	0	0	0	0	0	0	0	0	9	0
New.ReferenceOTU974	0	6	0	0	3	57	0	0	0	0	0	0	6	0	0	0	3	0	0	0	0	0	0	0	0	0	0	0	3	0	0	3	0	0	0	8	9	3	0	0	0	0	0	0	0	0	0	15	0
New.CleanUp.ReferenceOTU188036	0	0	0	0	0	0	0	0	0	0	0	0	0	0	0	0	0	0	0	0	0	0	0	0	0	0	0	0	0	0	0	0	0	0	0	0	0	0	0	0	0	0	0	0	0	0	0	0	0
499834	0	0	0	0	0	0	0	0	0	0	0	0	0	0	0	0	0	0	0	0	0	0	0	0	0	0	0	0	0	0	0	0	0	0	0	0	0	0	0	0	0	0	0	0	0	0	0	0	0
3453867	0	0	0	0	0	0	0	0	0	0	0	0	0	0	0	0	0	0	0	0	0	0	0	0	0	0	0	0	0	0	0	0	0	0	0	0	0	0	0	0	0	0	0	0	0	0	0	0	0
New.CleanUp.ReferenceOTU302835	0	0	0	0	0	0	0	0	0	0	0	0	0	0	0	0	0	0	0	0	0	0	0	0	0	0	0	0	0	0	0	0	0	0	0	0	0	0	0	0	0	0	0	0	0	0	0	0	0
1580717	0	0	0	0	0	29	0	0	0	0	0	0	0	0	0	0	0	0	0	0	0	0	0	0	0	0	0	46	0	0	0	0	0	0	0	0	0	0	0	0	0	0	0	0	0	0	0	0	0
1134746	0	0	0	0	0	0	0	0	0	0	0	0	0	0	0	0	0	0	0	0	0	0	0	0	0	0	0	0	0	0	0	0	0	0	0	0	0	0	0	0	0	0	0	0	0	0	0	0	0
New.CleanUp.ReferenceOTU68153	0	0	0	0	0	0	0	0	0	0	0	0	0	0	0	0	0	0	0	0	0	0	0	0	0	0	0	0	0	0	0	0	0	0	0	0	0	0	0	0	0	0	0	0	0	0	0	0	0
New.ReferenceOTU116	0	0	0	0	0	0	0	0	0	0	0	0	0	0	0	0	0	0	0	0	0	0	0	0	0	0	0	0	0	0	0	0	0	0	0	0	0	0	0	0	0	0	0	0	0	0	0	0	0
New.CleanUp.ReferenceOTU7297	0	0	0	0	0	0	0	0	0	0	0	0	0	0	0	0	0	0	0	0	0	0	0	0	0	0	0	0	0	0	0	0	0	0	0	0	0	0	0	0	0	0	0	0	0	0	0	0	0
692372	0	0	0	0	0	0	0	0	0	0	0	0	0	0	0	0	0	0	0	0	0	0	0	0	0	0	0	0	0	0	0	0	0	0	0	0	0	0	0	0	0	0	0	0	0	0	0	0	0
New.CleanUp.ReferenceOTU21008	0	0	0	0	0	0	0	0	0	0	0	0	0	0	0	0	0	0	0	0	0	0	0	0	0	0	0	0	0	0	0	0	0	0	0	0	0	0	0	0	0	0	0	0	0	0	0	0	0
4444048	0	0	0	0	0	0	0	0	0	0	0	0	0	0	0	0	0	0	0	0	0	0	0	0	0	0	0	0	0	0	0	0	0	0	0	0	3	0	0	0	0	0	0	0	0	0	0	0	0
New.CleanUp.ReferenceOTU39257	0	0	0	0	0	0	0	0	0	0	0	0	0	0	0	0	0	0	0	0	0	0	0	0	0	0	0	0	0	0	0	0	0	0	0	0	0	0	0	0	0	0	0	0	0	0	0	0	0
New.CleanUp.ReferenceOTU290467	0	0	0	0	0	0	0	0	0	0	0	0	0	0	0	0	0	0	0	0	0	0	0	0	0	0	0	0	0	0	0	0	0	0	0	0	0	0	0	0	0	0	0	0	0	0	0	0	0
830471	0	0	0	0	0	0	0	0	0	0	0	0	0	0	0	0	0	0	0	0	0	0	0	0	0	0	0	0	0	0	0	0	0	0	0	0	0	0	0	0	0	0	0	0	0	0	0	0	0
New.CleanUp.ReferenceOTU191786	0	0	0	0	0	0	0	0	0	0	3	0	0	0	0	0	0	15	0	0	0	0	0	0	0	0	0	0	0	3	0	0	0	5	0	0	0	0	0	0	0	0	0	0	0	0	5	0	0
New.CleanUp.ReferenceOTU266881	0	0	0	0	0	0	0	0	0	0	0	0	0	0	0	0	0	0	0	0	0	0	0	0	0	0	0	0	0	0	0	0	0	0	0	0	0	0	0	0	0	0	0	0	0	0	0	0	0
979643	0	0	0	0	0	0	0	0	0	0	0	0	0	0	0	0	0	0	0	0	0	0	0	0	0	0	0	0	0	0	0	0	0	0	0	0	0	0	0	0	0	0	0	0	0	0	0	0	0
New.ReferenceOTU877	0	0	0	0	0	0	0	0	0	0	0	0	0	0	0	0	0	0	0	0	0	0	0	0	0	0	0	0	0	0	0	0	0	0	0	0	0	0	0	0	0	0	0	0	0	0	0	0	0
1144430	0	0	0	0	0	0	0	0	0	0	0	0	0	0	0	0	0	0	0	0	0	0	0	0	0	0	0	0	0	0	0	0	0	0	0	0	0	0	0	0	0	0	0	0	0	0	0	0	0
New.CleanUp.ReferenceOTU212503	0	0	0	0	0	0	0	0	0	0	0	0	0	0	0	0	0	0	0	0	0	0	0	0	0	0	0	0	0	0	0	0	0	0	0	0	0	0	0	0	0	0	0	0	0	0	0	0	0
New.CleanUp.ReferenceOTU45262	0	0	0	0	0	0	0	0	0	0	0	0	0	0	0	0	0	0	0	0	0	0	0	0	0	0	0	0	0	0	0	0	0	0	0	0	0	0	0	0	0	0	0	0	0	0	0	0	0
New.CleanUp.ReferenceOTU81215	0	0	0	0	0	0	0	0	0	0	0	0	0	0	0	0	0	0	0	0	0	0	0	0	0	0	0	0	0	0	0	0	0	0	0	0	0	0	0	0	0	0	0	0	0	0	0	0	0
New.CleanUp.ReferenceOTU356204	0	0	0	0	0	0	0	0	0	0	0	0	0	0	0	0	0	0	0	0	0	0	0	0	0	0	0	0	0	0	0	0	0	0	0	0	0	0	0	0	0	0	0	0	0	0	0	0	0
New.CleanUp.ReferenceOTU97344	0	0	0	0	0	0	0	0	0	8	0	0	4	0	0	0	0	0	0	0	0	0	0	0	0	0	0	0	0	0	0	5	0	0	0	0	0	0	0	0	0	5	0	0	0	0	0	4	4
New.CleanUp.ReferenceOTU228309	0	0	0	0	0	0	0	0	0	0	0	0	0	0	0	0	0	0	0	0	0	0	0	0	0	0	0	0	0	0	0	0	0	0	0	0	0	0	0	0	0	0	0	0	0	0	0	0	0
250328	0	0	0	0	0	0	0	0	0	0	0	0	0	0	0	0	0	0	0	0	0	0	0	0	0	0	0	0	0	0	0	0	0	0	0	0	0	0	0	0	0	0	0	0	0	0	0	0	0
New.CleanUp.ReferenceOTU107489	0	0	0	0	0	0	0	0	0	0	0	0	0	0	0	0	0	0	0	0	0	0	0	0	0	0	0	0	0	0	0	0	0	0	0	0	0	0	0	0	0	0	0	0	0	0	0	0	0
New.CleanUp.ReferenceOTU294163	0	0	0	0	0	0	0	0	0	0	0	0	0	0	0	0	0	0	0	0	0	0	0	0	0	0	0	0	0	0	0	0	0	0	0	0	0	0	0	0	0	0	0	0	0	0	0	0	0
New.CleanUp.ReferenceOTU282942	0	0	0	0	0	0	0	0	0	0	0	0	0	0	0	0	0	0	0	0	0	0	0	0	0	0	0	0	0	0	0	0	0	0	0	0	0	0	0	0	0	0	0	0	0	0	0	0	0
269075	0	0	0	0	0	0	0	0	0	0	0	0	0	0	0	0	0	0	0	0	0	0	0	0	0	0	0	0	0	0	0	0	0	0	0	0	0	0	0	0	0	0	0	0	0	0	0	0	0
New.ReferenceOTU604	0	0	0	0	0	0	0	0	0	0	0	0	0	0	0	0	0	0	0	0	0	0	0	0	0	0	0	0	0	0	0	0	0	0	0	0	0	0	0	0	0	0	0	0	0	0	0	0	0
New.ReferenceOTU562	0	0	0	0	0	0	0	0	0	0	0	0	0	0	0	0	0	0	0	0	0	0	0	0	0	0	0	0	0	0	0	0	0	0	0	0	0	0	0	0	0	0	0	0	0	0	0	0	0
New.CleanUp.ReferenceOTU214153	0	3	0	0	0	0	0	0	0	0	0	0	0	0	0	0	0	0	0	0	0	0	0	0	0	0	0	0	0	0	0	5	0	0	0	0	0	0	0	0	0	0	0	0	4	0	0	6	0
New.CleanUp.ReferenceOTU4342	0	0	0	0	0	0	0	0	0	0	0	0	0	0	0	0	0	0	0	0	0	0	0	0	0	0	0	0	0	0	0	0	0	0	0	0	0	0	0	0	0	0	0	0	0	0	0	0	0
New.CleanUp.ReferenceOTU254091	0	0	0	0	0	0	0	0	0	0	0	0	0	0	0	0	0	0	0	0	0	0	0	0	0	0	0	0	0	0	0	0	0	0	0	0	0	0	0	0	0	0	0	0	0	0	0	0	0
New.CleanUp.ReferenceOTU323535	0	4	0	0	0	0	0	0	0	6	0	0	4	0	0	0	5	0	0	0	0	0	0	0	0	0	0	0	0	0	0	17	0	0	0	9	6	0	0	0	0	0	0	0	4	0	0	25	0
New.CleanUp.ReferenceOTU73381	0	0	0	0	0	0	0	0	0	0	0	0	0	3	0	0	0	0	0	0	0	0	0	0	0	0	0	0	0	0	0	0	0	0	0	0	0	0	0	0	0	0	0	0	0	0	0	0	0
4362197	0	0	0	0	0	0	0	0	0	0	0	0	0	0	0	0	0	0	0	0	0	0	0	0	0	0	0	0	0	0	0	0	0	0	0	0	0	0	0	0	0	0	0	0	0	0	0	0	0
New.CleanUp.ReferenceOTU53047	0	0	0	0	0	0	0	0	0	0	0	0	0	0	0	0	0	0	0	0	0	0	0	0	0	0	0	0	0	0	0	0	0	0	0	0	0	0	0	0	0	0	0	0	0	0	0	0	0
New.CleanUp.ReferenceOTU276887	0	6	0	0	0	0	0	0	0	0	0	0	0	0	0	0	0	0	0	0	0	0	0	0	0	0	0	68	0	0	0	11	0	0	0	0	0	0	0	0	0	0	0	0	0	0	0	3	0
New.ReferenceOTU799	0	0	0	0	0	0	0	0	0	0	0	0	0	0	0	0	0	0	0	0	0	0	0	0	0	0	0	0	0	0	0	0	0	0	0	0	0	0	0	0	0	0	0	0	0	0	0	0	0
4458429	0	5	0	0	0	0	0	0	0	0	0	0	0	0	0	0	0	0	0	0	0	0	0	0	0	0	0	0	0	0	0	25	0	0	3	0	0	0	0	0	0	0	0	0	0	0	0	4	0
New.CleanUp.ReferenceOTU116563	0	0	0	0	0	0	0	0	0	0	0	0	0	0	0	0	0	0	0	0	0	0	0	0	0	0	0	0	0	0	0	0	0	0	0	0	0	0	0	0	0	0	0	0	0	0	0	0	0
New.CleanUp.ReferenceOTU355937	0	0	0	0	0	0	0	0	0	0	0	0	0	0	0	0	0	0	0	0	0	0	0	0	0	0	0	0	0	0	0	0	0	0	0	0	0	0	0	0	0	0	0	0	0	0	0	0	0
579256	0	0	0	0	0	0	0	0	0	0	0	0	0	0	0	0	0	0	0	0	0	0	0	0	0	0	0	0	0	0	0	0	0	0	0	0	0	0	0	0	0	0	0	0	0	0	0	0	0
765873	0	0	0	0	0	0	0	0	0	0	0	0	0	0	0	0	0	0	0	0	0	0	0	0	0	0	0	0	0	0	0	26	0	0	0	4	5	0	0	0	0	0	0	0	0	0	0	0	0
New.CleanUp.ReferenceOTU251264	0	0	0	0	0	0	0	0	0	0	0	0	0	0	0	0	0	0	0	0	0	0	0	0	0	0	0	0	0	0	0	0	0	0	0	0	0	0	0	0	0	0	0	0	0	0	0	0	0
520693	0	3	0	0	0	0	0	0	0	0	0	0	0	0	0	0	0	0	0	0	0	0	0	0	0	0	0	0	0	0	0	4	0	0	0	0	0	0	0	0	0	0	0	0	0	0	0	0	0
New.CleanUp.ReferenceOTU135384	0	0	0	0	0	0	0	0	0	0	0	0	0	0	0	0	0	0	0	0	0	0	0	0	0	0	0	0	0	0	0	0	0	0	0	0	0	0	0	0	0	0	0	0	0	0	0	0	0
New.CleanUp.ReferenceOTU8162	0	0	0	0	0	0	0	0	0	0	0	0	0	0	0	0	0	0	0	0	0	0	0	0	0	0	0	0	0	0	0	5	0	0	0	0	0	0	0	0	0	0	0	0	0	0	0	4	0
4017927	0	0	0	0	0	0	0	0	0	0	0	0	0	0	0	0	0	0	0	0	0	0	0	0	0	0	0	0	0	0	0	0	0	0	0	0	0	0	0	0	0	0	0	0	0	0	0	0	0
655207	0	0	0	0	0	0	0	0	0	0	0	0	0	0	0	0	0	0	0	0	0	0	0	0	0	0	0	0	0	0	0	0	0	0	0	0	0	0	0	0	0	0	0	0	0	0	0	0	0
New.CleanUp.ReferenceOTU358947	0	0	0	0	0	0	0	0	0	0	0	0	0	0	0	0	0	0	0	0	0	0	0	0	0	0	0	0	0	0	0	0	0	0	0	0	0	0	0	0	0	0	0	0	0	0	0	0	0
New.CleanUp.ReferenceOTU89587	0	0	0	0	0	0	0	0	0	0	0	0	0	0	0	0	0	0	0	0	0	0	0	0	0	0	0	0	0	0	0	0	5	0	0	0	0	0	0	0	0	0	0	0	0	0	0	0	0
New.CleanUp.ReferenceOTU214368	0	0	0	0	0	0	0	0	0	0	0	0	0	0	0	0	0	0	0	0	0	0	0	0	0	0	0	0	0	0	0	0	0	0	0	0	0	0	0	0	0	0	0	0	0	0	0	0	0
New.CleanUp.ReferenceOTU270740	0	0	0	0	0	0	0	0	0	0	0	0	0	0	0	0	0	0	0	0	0	0	0	0	0	0	0	0	0	0	0	0	0	0	0	0	4	0	0	0	0	0	0	0	0	0	0	0	0
New.CleanUp.ReferenceOTU325448	0	0	0	0	0	0	0	0	0	0	0	0	0	0	0	0	0	0	0	0	0	0	0	0	0	0	0	0	0	0	0	0	0	0	0	0	0	0	0	0	0	0	0	0	0	0	0	0	0
New.CleanUp.ReferenceOTU253761	0	0	0	0	0	0	0	0	0	3	0	0	0	0	0	0	0	0	0	0	0	0	0	0	0	0	0	0	0	0	0	0	0	0	0	0	0	0	0	0	0	0	0	0	0	0	0	0	0
New.CleanUp.ReferenceOTU278214	0	0	0	0	0	0	0	0	0	0	0	0	0	0	0	0	0	0	0	0	0	0	0	0	0	0	0	0	0	0	0	0	0	0	0	0	0	0	0	0	0	0	0	0	0	0	0	0	0
New.CleanUp.ReferenceOTU329298	0	0	0	0	0	0	0	0	0	0	0	0	0	0	0	0	0	0	0	0	0	0	0	0	0	0	0	0	0	0	0	0	0	0	0	0	0	0	0	0	0	0	0	0	0	0	0	0	0
New.ReferenceOTU168	0	0	0	0	0	0	0	0	0	0	0	0	0	0	0	0	0	0	0	0	0	0	0	0	0	0	0	0	0	0	0	38	0	0	0	0	0	0	0	0	0	0	0	0	0	0	0	5	0
New.CleanUp.ReferenceOTU159634	0	0	0	0	0	0	0	0	0	0	0	0	0	0	0	0	0	0	0	0	0	0	0	0	0	0	0	0	0	0	0	0	0	0	0	0	0	0	0	0	0	0	0	0	0	0	0	0	0
New.CleanUp.ReferenceOTU268891	0	0	0	0	0	0	0	0	0	0	0	0	0	0	0	0	0	0	0	0	0	0	0	0	0	0	0	0	0	0	0	0	0	0	0	0	0	0	0	0	0	0	0	0	0	0	0	0	0
559075	0	0	0	0	0	0	0	0	0	0	0	0	0	0	0	0	0	0	0	0	0	0	0	0	0	0	0	0	0	0	0	0	0	0	0	0	0	0	0	0	0	0	0	0	0	0	0	0	0
New.CleanUp.ReferenceOTU135775	0	0	0	0	0	0	0	0	0	0	0	0	0	0	0	0	0	0	0	0	0	0	0	0	0	0	0	0	0	0	0	6	0	0	0	0	0	0	0	0	0	0	0	0	0	0	0	0	0
New.CleanUp.ReferenceOTU303762	0	5	0	0	0	0	0	0	0	4	0	0	0	0	0	0	0	0	0	0	0	0	0	0	0	0	0	0	0	0	0	8	0	0	0	0	0	0	0	0	0	0	0	0	3	0	0	14	0
New.CleanUp.ReferenceOTU331445	0	0	0	0	0	0	0	0	0	0	0	0	0	0	0	0	0	0	0	0	0	0	0	0	0	0	0	0	0	0	0	0	0	0	0	0	0	0	0	0	0	0	0	0	0	0	0	0	0
New.CleanUp.ReferenceOTU232044	0	0	0	0	0	0	0	0	0	0	0	0	0	0	0	0	0	0	0	0	0	0	0	0	0	0	0	0	0	0	0	0	0	0	0	0	0	0	0	0	0	0	0	0	0	0	0	0	0
New.CleanUp.ReferenceOTU61439	0	0	0	0	0	0	0	0	0	0	0	0	0	0	0	0	0	0	0	0	0	0	0	0	0	0	0	0	0	0	0	0	0	0	0	0	0	0	0	0	0	0	0	0	0	0	0	0	0
New.CleanUp.ReferenceOTU201060	0	0	0	0	0	0	0	0	0	0	0	0	0	0	0	0	0	0	0	0	0	0	0	0	0	0	0	0	0	0	0	0	0	0	0	0	0	0	0	0	0	0	0	0	0	0	0	0	0
4396128	0	0	0	0	0	0	0	0	0	0	0	0	0	0	0	0	0	0	0	0	0	0	0	0	0	0	0	0	0	0	0	0	0	0	0	3	0	0	0	0	0	0	0	0	0	0	0	0	0
New.CleanUp.ReferenceOTU334188	0	0	0	0	0	0	0	0	0	0	0	0	0	0	0	0	0	0	0	0	0	0	0	0	0	0	0	0	0	0	0	0	0	0	0	0	0	0	0	0	0	0	0	0	0	0	0	0	0
4355495	0	0	0	0	0	19	0	0	0	0	0	0	0	0	0	0	0	0	0	0	0	0	0	0	0	0	0	0	0	0	0	0	6	0	3	0	0	0	0	0	0	0	0	0	0	0	0	0	0
New.CleanUp.ReferenceOTU315073	0	0	0	0	0	0	0	0	0	0	0	0	0	0	0	0	0	0	0	0	0	0	0	0	0	0	0	0	0	0	0	0	6	0	0	0	0	0	0	0	0	0	0	0	0	0	0	0	0
New.CleanUp.ReferenceOTU141096	0	0	0	0	0	0	0	0	0	0	0	0	0	0	0	0	0	0	0	0	0	0	0	0	0	0	0	0	0	0	0	0	0	0	0	0	0	0	0	0	0	0	0	0	0	0	0	0	0
New.CleanUp.ReferenceOTU340873	0	0	0	0	0	0	0	0	0	0	0	0	0	0	0	0	0	0	0	0	0	0	0	0	0	0	0	0	0	0	0	0	0	0	0	0	0	0	0	0	0	0	0	0	0	0	0	0	0
4439712	0	0	0	0	0	0	0	0	0	0	0	0	0	0	0	0	0	0	0	0	0	0	0	0	0	0	0	0	0	0	0	0	0	0	0	0	0	0	0	0	0	0	0	0	0	0	0	0	0
New.CleanUp.ReferenceOTU63677	0	0	0	0	0	0	0	0	0	0	0	0	0	0	0	0	0	0	0	0	0	0	0	0	0	0	0	0	0	0	0	0	0	0	0	0	0	0	0	0	0	0	0	0	0	0	0	0	0
New.CleanUp.ReferenceOTU255606	0	0	0	0	0	0	0	0	0	0	0	0	0	0	0	0	0	0	0	0	0	0	0	0	0	0	0	0	0	0	0	0	0	0	0	0	0	0	0	0	0	0	0	0	0	0	0	0	0
New.CleanUp.ReferenceOTU283604	0	0	0	0	0	0	0	0	0	0	0	0	0	0	0	0	0	0	0	0	0	0	0	0	0	0	0	0	0	0	0	8	0	0	0	0	0	0	0	0	0	0	0	0	0	0	0	10	3
308164	0	0	0	0	0	0	0	0	0	0	0	0	0	0	0	0	0	0	0	0	0	0	0	0	0	0	0	0	0	0	0	0	0	0	0	0	0	0	0	0	0	0	0	0	0	0	0	0	0
271897	0	0	0	0	0	0	0	0	0	0	0	0	0	0	0	0	0	0	0	0	0	0	0	0	0	0	0	0	0	0	0	0	0	0	0	0	0	0	0	0	0	0	0	0	0	0	0	0	0
4075738	0	0	0	0	0	0	0	0	0	0	0	0	0	0	0	0	0	0	0	0	0	0	0	0	0	0	0	0	0	0	0	0	0	0	0	0	0	0	0	0	0	0	0	0	0	0	0	0	0
555396	0	0	0	0	0	0	0	0	0	0	0	0	0	0	0	0	0	0	0	0	0	0	0	0	0	0	0	0	0	0	0	0	0	0	0	0	0	0	0	0	0	0	0	0	0	0	0	0	0
569691	0	0	0	0	0	0	0	0	0	0	0	0	0	0	0	0	0	0	0	0	0	0	0	0	0	0	0	0	0	0	0	0	0	0	0	0	0	0	0	0	0	0	0	0	0	0	0	0	0
New.CleanUp.ReferenceOTU66279	0	0	0	0	0	0	0	0	0	0	0	0	0	0	0	0	0	0	0	0	0	0	0	0	0	0	0	55	0	0	0	6	0	0	0	0	0	0	0	0	0	0	0	0	0	0	0	0	0
New.CleanUp.ReferenceOTU154253	0	0	0	0	0	0	0	0	0	0	0	0	0	0	0	0	0	0	0	0	0	0	0	0	0	0	0	0	0	0	0	0	0	0	0	0	0	0	0	0	0	0	0	0	0	0	0	0	0
530861	0	0	0	0	0	0	0	0	0	0	0	0	0	0	0	0	0	0	0	0	0	0	0	0	0	0	0	0	0	0	0	0	0	0	0	0	0	0	0	0	0	0	0	0	0	0	0	0	0
New.CleanUp.ReferenceOTU1903	0	0	0	0	0	0	0	0	0	0	0	0	0	0	0	0	0	0	0	0	0	0	0	0	0	0	0	0	0	0	0	0	0	0	0	0	0	0	0	0	0	0	0	0	0	0	0	0	0
New.CleanUp.ReferenceOTU51864	0	0	0	0	0	0	0	0	0	0	0	0	0	0	0	0	0	0	0	0	0	0	0	0	0	0	0	0	0	0	0	0	0	0	0	0	0	0	0	0	0	0	0	0	0	0	0	0	0
New.CleanUp.ReferenceOTU59288	0	0	0	0	0	0	0	0	0	0	0	0	0	0	0	0	0	0	0	0	0	0	0	0	0	0	0	0	0	0	0	0	0	0	0	0	0	0	0	0	0	0	0	0	0	0	0	0	0
New.CleanUp.ReferenceOTU316216	0	0	0	0	0	0	0	0	0	0	0	0	0	0	0	0	0	0	0	0	0	0	0	0	0	0	0	0	0	0	0	0	0	0	0	0	0	0	0	0	0	0	0	0	0	0	0	0	0
New.CleanUp.ReferenceOTU144305	0	0	0	0	0	0	0	0	0	0	0	0	0	0	0	0	0	0	0	0	0	0	0	0	0	0	0	0	0	0	0	0	0	0	0	0	0	0	0	0	0	0	0	0	0	0	0	0	0
New.CleanUp.ReferenceOTU195257	0	0	0	0	0	0	0	0	0	4	0	0	0	0	0	0	0	0	0	0	0	0	0	0	0	0	0	0	0	0	0	0	0	0	0	0	0	0	0	0	0	0	0	0	0	38	0	0	0
New.CleanUp.ReferenceOTU350056	0	0	0	0	0	45	0	0	0	0	0	0	0	0	0	0	0	0	0	0	0	0	0	0	0	0	0	0	0	0	0	0	0	0	0	0	0	0	0	0	0	0	0	0	0	0	0	0	0
208829	0	3	0	0	0	0	0	0	0	0	0	0	0	0	0	0	0	0	0	0	0	0	0	0	0	0	0	0	0	0	0	0	0	0	0	0	0	0	0	0	4	0	0	0	0	0	0	4	0
New.CleanUp.ReferenceOTU173066	0	0	0	0	0	0	0	0	0	0	0	0	0	0	0	0	0	0	0	0	0	0	0	0	0	0	0	0	0	0	0	0	0	0	0	0	0	0	0	0	0	0	0	0	0	0	0	0	0
New.CleanUp.ReferenceOTU256172	0	0	0	0	0	0	0	0	0	0	0	0	0	0	0	0	0	0	0	0	0	0	0	0	0	0	0	4	0	0	0	4	0	0	0	0	0	0	0	0	0	0	0	0	5	0	0	5	0
2905447	0	0	0	0	0	0	0	0	0	0	0	0	0	0	0	0	0	0	0	0	0	0	0	0	0	0	0	0	0	0	0	0	0	0	0	0	0	0	0	0	0	0	0	0	3	0	0	15	0
New.CleanUp.ReferenceOTU96140	0	0	0	0	0	0	0	0	0	0	0	0	0	0	0	0	0	0	0	0	0	0	0	0	0	0	0	0	0	0	0	0	0	0	0	0	0	0	0	0	0	0	0	0	0	0	0	0	0
New.CleanUp.ReferenceOTU149092	0	0	0	0	0	0	0	0	0	0	0	0	0	0	0	0	0	0	0	0	0	0	0	0	0	0	0	0	0	0	0	0	0	0	0	0	0	0	0	0	0	0	0	0	0	0	0	0	0
New.ReferenceOTU1124	0	0	0	0	0	0	0	0	0	0	0	0	0	0	0	0	0	0	3	0	0	0	0	0	0	0	0	0	0	0	0	0	0	0	0	0	0	0	0	0	0	0	0	0	0	0	0	0	0
New.CleanUp.ReferenceOTU126994	0	0	0	0	0	0	0	0	0	0	0	0	0	0	0	0	0	0	0	0	0	0	0	0	0	0	0	0	0	0	0	0	0	0	0	0	0	0	0	0	0	0	0	0	0	0	0	0	0
4457211	0	0	0	0	0	0	0	0	0	0	0	0	0	0	0	0	0	0	0	0	0	0	0	0	0	0	0	0	0	0	0	0	0	0	0	0	0	0	0	0	0	0	0	0	0	0	0	0	0
New.CleanUp.ReferenceOTU46480	0	0	0	0	0	0	0	0	0	0	0	0	0	0	0	0	0	0	0	0	0	0	0	0	0	0	0	0	0	0	0	0	0	0	0	0	0	0	0	0	0	0	0	0	0	0	0	0	0
New.CleanUp.ReferenceOTU309488	0	0	0	0	0	0	0	0	0	0	0	0	0	0	0	0	0	0	0	0	0	0	0	0	0	0	0	0	0	0	0	0	0	0	0	0	0	0	0	0	0	0	0	0	0	0	0	0	0
New.CleanUp.ReferenceOTU27576	0	0	0	0	0	0	0	0	0	0	0	0	0	0	0	0	0	0	0	0	0	0	0	0	0	0	0	0	0	0	0	0	0	0	0	0	0	0	0	0	0	0	0	0	0	0	0	0	0
New.CleanUp.ReferenceOTU258326	0	0	0	0	0	0	0	0	0	0	0	0	0	0	0	0	0	0	0	0	0	0	0	0	0	0	0	0	0	0	0	0	0	0	0	0	0	0	0	0	0	0	0	0	0	0	0	0	0
New.CleanUp.ReferenceOTU189641	0	0	0	0	0	0	0	0	0	0	0	0	0	0	0	0	0	0	0	0	0	0	0	0	0	0	0	0	0	0	0	0	0	0	0	0	0	0	0	0	0	0	0	0	0	0	0	0	0
New.CleanUp.ReferenceOTU319477	0	0	0	0	0	0	0	0	0	0	0	0	0	0	0	0	0	0	0	0	0	0	0	0	0	0	0	0	0	0	0	0	0	0	0	0	0	0	0	0	0	0	0	0	0	0	0	0	0
2375043	0	0	0	0	0	0	0	0	0	0	0	0	0	0	0	0	0	0	0	0	0	0	0	0	0	0	0	0	0	0	0	0	8	0	0	0	0	0	0	0	0	0	0	0	0	0	0	0	0
New.ReferenceOTU482	0	3	0	0	0	0	0	0	0	0	0	0	0	0	0	4	0	9	0	0	0	0	0	0	0	0	0	0	0	0	0	9	0	0	0	0	0	0	0	0	0	3	0	0	0	0	0	4	0
New.CleanUp.ReferenceOTU26796	0	0	0	0	0	0	0	0	0	0	0	0	0	0	0	0	0	0	0	0	0	0	0	0	0	0	0	0	0	0	0	0	0	0	0	0	0	0	0	0	0	0	0	0	0	0	0	0	0
New.CleanUp.ReferenceOTU155159	0	0	0	0	0	0	0	0	0	0	0	0	0	0	0	0	0	0	0	0	0	0	0	0	0	0	0	0	0	0	0	0	0	0	0	0	0	0	0	0	0	0	0	0	0	0	0	0	0
New.CleanUp.ReferenceOTU174971	0	0	0	0	0	6	0	0	0	0	0	0	0	0	0	0	0	0	0	0	0	0	0	0	0	0	0	0	0	0	0	13	0	0	0	0	0	0	0	0	0	0	0	0	0	0	0	3	0
New.CleanUp.ReferenceOTU109244	0	0	0	0	0	0	0	0	0	0	0	0	0	0	0	0	0	0	0	0	0	0	0	0	0	0	0	0	0	0	0	0	0	0	0	0	0	0	0	0	0	0	0	0	0	0	0	0	0
New.CleanUp.ReferenceOTU93279	0	0	0	0	0	0	0	0	0	0	0	0	0	0	0	0	0	0	0	0	0	0	0	0	0	0	0	0	0	0	0	0	0	0	0	0	0	0	0	0	0	0	0	0	0	0	0	0	0
241588	0	0	0	0	0	0	0	0	0	0	0	0	0	0	0	0	0	0	0	0	0	0	0	0	0	0	0	0	0	0	0	0	0	0	0	0	0	0	0	0	0	0	0	0	0	0	0	0	0
208621	0	0	0	0	0	0	0	0	0	0	0	0	0	0	0	0	0	0	0	0	0	0	0	0	0	0	0	0	0	0	0	0	0	0	0	3	5	0	0	0	0	0	0	0	0	0	0	0	0
588739	0	0	0	0	0	0	0	0	0	0	0	0	0	0	0	0	0	0	0	0	0	0	0	0	0	0	0	0	0	0	0	0	0	0	0	0	0	0	0	0	0	0	0	0	0	0	0	0	0
New.CleanUp.ReferenceOTU281650	0	0	0	0	0	0	0	0	0	0	0	0	0	0	0	0	0	0	0	0	0	0	0	0	0	0	0	0	0	0	0	0	0	0	0	0	0	0	0	0	0	0	0	0	0	0	0	0	0
519739	0	0	0	0	0	0	0	0	0	0	0	0	0	0	0	0	0	0	0	0	0	0	0	0	0	0	0	0	0	0	0	0	0	0	0	0	0	0	0	0	0	0	0	0	0	0	0	0	0
4367890	0	0	0	0	0	0	0	0	0	0	0	0	0	0	0	0	0	0	0	0	0	0	0	0	0	0	0	0	0	0	0	0	0	0	0	0	0	0	0	0	0	0	0	0	0	0	0	0	0
New.CleanUp.ReferenceOTU50295	0	0	0	0	0	0	0	0	0	0	0	0	0	0	0	0	0	0	0	0	0	0	0	0	0	0	0	0	0	0	0	0	0	0	0	0	0	0	0	0	0	0	0	0	0	0	0	0	0
New.ReferenceOTU524	0	0	0	0	0	0	0	0	0	0	0	0	0	0	0	0	0	0	0	0	0	0	0	0	5	0	0	0	0	0	0	0	0	0	0	0	0	0	0	0	0	0	0	0	0	0	0	0	0
719818	0	0	0	0	0	0	0	0	0	0	0	0	0	0	0	0	0	0	0	0	0	0	0	0	0	0	0	0	0	0	0	0	0	0	0	0	0	0	0	0	0	0	0	0	0	0	0	0	0
New.CleanUp.ReferenceOTU182123	0	0	0	0	0	0	0	0	0	0	0	0	0	0	0	0	0	0	0	0	0	0	0	0	0	0	0	0	0	0	0	0	0	0	0	0	0	0	0	0	0	0	0	0	0	0	0	0	0
993307	0	0	0	0	0	0	0	0	0	0	0	0	0	0	0	0	0	0	0	0	0	0	0	0	0	0	0	0	0	0	0	0	0	0	0	0	0	0	0	0	0	0	0	0	0	0	0	0	0
New.ReferenceOTU1145	0	0	0	0	0	0	0	0	0	0	0	0	0	0	0	0	0	0	0	0	0	0	0	0	0	0	0	0	0	0	0	0	0	0	0	0	0	0	0	0	0	0	0	0	0	0	0	0	0
New.CleanUp.ReferenceOTU189991	0	0	0	0	0	0	0	0	0	0	0	0	0	0	0	0	0	0	0	0	0	0	0	0	0	0	0	0	0	0	0	0	0	0	0	0	0	0	0	0	0	0	0	0	0	0	0	0	0
4295894	0	0	0	0	0	0	0	0	0	0	0	0	0	0	0	0	0	0	0	0	0	0	0	0	0	0	0	0	0	0	0	0	0	0	0	0	0	0	0	0	0	0	0	0	0	0	0	0	0
New.CleanUp.ReferenceOTU264813	0	0	0	0	0	0	0	0	0	0	0	0	0	0	0	0	0	0	0	0	0	0	0	0	0	0	0	0	0	0	0	0	0	0	0	0	0	0	0	0	0	0	0	0	0	0	0	0	0
4398567	0	0	0	0	0	0	0	0	0	0	0	0	0	0	0	0	0	0	0	0	0	0	0	0	0	0	0	0	0	0	0	0	0	0	0	0	0	0	0	0	0	0	0	0	0	0	0	0	0
New.ReferenceOTU380	0	0	0	0	0	0	0	0	0	0	0	0	0	0	0	0	0	0	0	0	0	0	0	0	0	0	0	0	0	0	0	0	0	0	0	0	0	0	0	0	0	0	0	0	0	0	0	0	0
891898	0	0	0	0	0	0	0	0	0	0	0	0	0	0	0	0	0	0	0	0	0	0	0	0	0	0	0	0	0	0	0	0	0	0	0	0	0	0	0	0	0	0	0	0	0	0	0	0	0
722776	0	0	0	0	0	0	0	0	0	0	0	0	0	0	0	0	0	0	0	0	0	0	0	0	0	0	0	0	0	0	0	0	0	0	0	0	0	0	0	0	0	0	0	0	0	0	0	0	0
513929	0	0	0	0	0	0	0	0	0	0	0	0	0	0	0	0	0	0	0	0	0	0	0	0	0	0	0	0	0	0	0	0	0	0	0	0	0	0	0	0	0	0	0	0	0	0	0	0	0
New.CleanUp.ReferenceOTU88125	0	0	0	0	0	0	0	0	0	0	0	0	0	0	0	0	0	0	0	0	0	0	0	0	0	0	0	0	0	0	0	0	0	0	0	0	0	0	0	0	0	0	0	0	0	0	0	0	0
1124589	0	0	0	0	0	0	0	0	0	0	0	0	0	0	0	0	0	0	0	0	0	0	0	0	0	0	0	0	0	0	0	0	0	0	0	0	0	0	0	0	0	0	0	0	0	0	0	0	0
New.CleanUp.ReferenceOTU117006	0	0	0	0	0	0	0	0	0	0	0	0	0	0	0	0	0	0	0	0	0	0	0	0	0	0	0	0	0	0	0	0	0	0	0	0	0	0	0	0	0	0	0	0	0	0	0	0	0
New.CleanUp.ReferenceOTU260226	0	0	0	0	0	0	0	0	0	0	0	0	0	0	0	0	0	0	0	0	0	0	0	0	0	0	0	0	0	0	0	0	0	0	0	0	0	0	0	0	0	0	0	0	0	0	0	0	0
New.CleanUp.ReferenceOTU166258	0	0	0	0	0	0	0	0	0	0	0	0	0	0	0	0	0	0	0	0	0	0	0	0	0	0	0	0	0	0	0	0	0	0	0	0	0	0	0	0	0	0	0	0	0	0	0	0	0
New.CleanUp.ReferenceOTU211843	0	0	0	0	0	0	0	0	0	0	0	0	0	0	0	0	0	0	0	0	0	0	0	0	0	0	0	0	0	0	0	0	0	0	0	0	0	0	0	0	0	0	0	0	0	0	0	0	0
575719	0	0	0	0	0	0	0	0	0	0	0	0	0	0	0	0	0	0	0	0	0	0	0	0	0	0	0	0	0	0	0	0	0	0	0	0	0	0	0	0	0	0	0	0	0	0	0	0	0
3893713	0	0	0	0	0	0	0	0	0	0	0	0	0	0	0	0	0	0	0	0	0	0	0	0	0	0	0	0	0	0	0	0	0	0	0	0	0	0	0	0	0	0	0	0	0	0	0	0	0
665602	0	0	0	0	0	0	0	0	0	0	0	0	0	0	0	0	0	0	0	0	0	0	0	0	0	0	0	0	0	0	0	0	0	0	0	0	0	0	0	0	0	0	0	0	0	0	0	0	0
New.CleanUp.ReferenceOTU165260	0	0	0	0	0	0	0	0	0	0	0	0	0	0	0	0	0	0	0	0	0	0	0	0	0	0	0	0	0	0	0	0	0	0	0	0	0	0	0	0	0	0	0	0	0	0	0	0	0
1147754	0	0	0	0	0	0	0	0	0	0	0	0	0	0	0	0	0	0	0	0	0	0	0	0	0	0	0	0	0	0	0	0	0	0	0	0	0	0	0	0	0	0	0	0	0	0	0	0	0
533778	0	0	0	0	0	0	0	0	0	0	0	0	0	0	0	0	0	0	0	0	0	0	0	0	0	0	0	0	0	0	0	0	0	0	0	0	0	0	0	0	0	0	0	0	0	0	0	0	0
521158	0	0	0	0	0	0	0	0	0	0	0	0	0	0	0	0	0	0	0	0	0	0	0	0	0	0	0	0	0	0	0	0	0	0	0	0	0	0	0	0	0	0	0	0	0	0	0	9	0
4330793	24	0	0	0	0	0	6	15	49	0	11	0	0	0	0	345	0	96	0	9	0	47	0	3	132	0	28	0	0	25	100	0	0	123	0	0	0	0	22	0	0	0	0	42	0	0	239	0	0
240784	0	6	0	0	0	0	0	0	0	7	0	0	0	0	0	11	0	6	0	0	0	0	0	0	0	0	0	0	0	0	0	3	28	3	3	7	0	0	0	0	3	0	0	0	5	0	3	21	0
529704	0	0	0	0	0	0	0	0	0	0	0	0	0	0	0	0	0	0	0	0	0	0	0	0	0	0	0	0	0	0	0	0	0	0	0	0	0	0	0	0	0	0	0	0	0	0	0	0	0
589189	0	4	0	0	0	0	0	0	0	0	0	0	0	0	0	0	4	4	0	0	0	0	0	0	5	0	0	24	0	0	0	30	0	0	0	0	4	0	0	0	0	0	0	3	0	0	4	3	0
214695	0	0	0	0	0	37	0	0	0	0	0	0	4	0	0	0	3	0	0	0	0	0	0	0	0	0	0	46	0	0	0	11	0	0	3	0	3	0	0	0	0	0	0	0	0	0	0	10	0
New.ReferenceOTU1162	0	0	0	0	0	0	0	0	0	0	0	0	0	0	0	0	0	0	0	0	0	0	0	0	0	0	0	0	0	0	0	0	0	0	0	0	0	0	0	0	0	0	0	0	0	0	0	0	0
4407152	0	0	0	0	0	0	0	0	0	0	0	0	0	0	0	0	0	0	0	0	0	0	0	0	0	0	0	0	0	0	0	0	12	0	0	0	0	0	0	0	0	0	0	0	0	0	0	0	0
105215	0	0	0	0	0	0	0	0	0	0	0	0	0	0	0	0	0	0	0	0	0	0	0	0	0	0	0	0	0	0	0	0	0	0	0	0	0	0	0	0	0	0	0	0	0	0	0	0	0
278198	0	0	0	0	0	0	0	0	0	0	0	0	0	0	0	0	0	0	0	0	0	0	0	0	0	0	0	0	0	0	0	0	0	0	0	0	0	0	0	0	0	0	0	0	0	0	0	0	0
235836	0	8	0	0	0	4	0	0	0	0	0	0	0	0	0	3	0	5	0	0	0	0	0	0	27	0	0	0	3	0	0	61	0	11	0	3	0	0	0	0	0	0	0	0	0	193	8	14	0
2863	0	0	0	0	0	0	0	0	0	0	0	0	0	0	0	0	0	0	0	0	0	0	0	0	0	0	0	0	0	0	0	0	0	0	0	0	0	0	0	0	0	0	0	0	0	0	0	0	0
New.ReferenceOTU1189	0	0	0	0	0	0	0	0	0	0	0	0	0	0	0	0	0	0	0	0	0	0	0	0	0	0	0	0	0	0	0	0	0	0	0	0	0	0	0	0	0	0	0	0	0	0	0	0	0
New.CleanUp.ReferenceOTU39033	0	0	0	0	0	0	0	0	0	0	0	0	0	0	0	0	0	0	0	0	0	0	0	0	10	0	0	56	0	0	0	89	3	4	0	0	0	0	0	0	0	0	0	0	0	0	0	4	3
New.CleanUp.ReferenceOTU223669	0	0	0	0	0	0	0	0	0	0	0	0	0	0	0	0	0	0	0	0	0	0	0	0	0	0	0	0	0	0	0	0	0	0	0	0	0	0	0	0	0	0	0	0	0	0	0	0	0
New.CleanUp.ReferenceOTU359296	0	0	0	0	0	0	0	0	0	0	0	0	0	0	0	0	0	0	0	0	0	0	0	0	0	0	0	0	0	0	0	0	0	0	0	0	0	0	0	0	0	0	0	0	0	0	0	0	0
415267	0	0	0	0	0	0	0	0	0	0	0	0	0	0	0	0	0	0	0	0	0	0	0	0	0	0	0	0	0	0	0	0	0	0	0	0	0	0	0	0	0	0	0	0	0	0	0	0	0
New.CleanUp.ReferenceOTU332483	0	0	0	0	0	0	0	0	0	0	0	0	0	0	0	0	0	0	0	0	0	0	0	0	0	0	0	0	0	0	0	0	0	0	0	0	0	0	0	0	0	0	0	0	0	0	0	0	0
New.CleanUp.ReferenceOTU92318	0	0	0	0	0	0	0	0	0	0	0	0	0	0	0	0	0	0	0	0	0	0	0	0	0	0	0	0	0	0	0	0	0	0	0	0	0	0	0	0	0	0	0	0	0	0	0	0	0
4348892	0	0	0	0	0	0	0	0	0	0	0	0	0	0	0	0	0	0	0	0	0	0	0	0	0	0	0	0	0	0	0	0	0	0	0	0	0	0	0	0	0	0	0	0	0	0	0	0	0
533695	0	0	0	0	0	0	0	0	0	0	0	0	0	0	0	0	0	0	0	0	0	0	0	0	0	0	0	0	0	0	0	0	0	0	0	0	0	0	0	0	0	0	0	0	0	0	0	0	0
New.CleanUp.ReferenceOTU241326	0	0	0	0	0	0	0	0	0	0	0	0	0	0	0	0	0	0	0	0	0	0	0	0	0	0	0	0	0	0	0	0	0	0	0	0	0	0	0	0	0	0	0	0	0	0	0	0	0
2344562	0	7	0	0	0	16	0	0	0	0	0	0	0	0	0	0	0	0	0	0	0	0	0	0	0	0	0	0	0	0	0	50	0	0	0	0	0	0	0	0	0	0	0	0	0	97	0	9	0
374822	0	0	0	0	0	0	0	0	0	0	0	0	0	0	0	0	0	0	0	0	0	0	0	0	0	0	0	0	0	0	0	0	0	0	0	0	0	0	0	0	0	0	0	0	0	0	0	0	0
New.CleanUp.ReferenceOTU339214	0	0	0	0	0	0	0	0	0	0	0	0	0	0	0	0	0	0	0	0	0	0	0	0	0	0	0	0	0	0	0	0	0	0	0	0	0	0	0	0	0	0	0	0	0	0	0	0	0
New.CleanUp.ReferenceOTU27829	0	0	0	0	0	6	0	0	0	0	0	0	0	0	0	0	0	0	0	0	0	0	0	0	0	0	0	0	0	0	0	0	0	0	0	0	0	0	0	0	0	0	0	0	0	0	0	0	0
838649	0	0	0	0	0	0	0	0	0	0	0	0	0	0	0	7	0	0	0	0	0	0	0	0	0	0	0	0	0	0	0	0	5	0	0	0	0	0	0	0	0	0	0	0	0	0	0	5	0
New.CleanUp.ReferenceOTU273539	0	0	0	0	0	0	0	0	0	0	0	0	0	0	0	0	0	0	0	0	0	0	0	0	0	0	0	0	0	0	0	0	0	0	0	0	0	0	0	0	0	0	0	0	0	0	0	0	0
4414056	0	0	0	0	0	0	0	0	0	0	0	0	0	0	0	0	0	0	0	0	0	0	0	0	0	0	0	0	0	0	0	0	0	0	0	0	0	0	0	0	0	0	0	0	0	0	0	0	0
722441	0	0	0	0	0	0	0	0	0	0	0	0	0	0	0	0	0	0	0	0	0	0	0	0	0	0	0	0	0	0	0	0	0	0	0	0	0	0	0	0	0	0	0	0	0	0	0	0	0
4365794	0	0	0	0	0	0	0	0	0	0	0	0	0	0	0	0	0	0	0	0	0	0	0	0	0	0	0	0	0	0	0	0	0	0	0	0	0	0	0	0	0	0	0	0	0	0	0	0	0
New.CleanUp.ReferenceOTU216456	0	0	0	0	0	0	0	0	0	0	0	0	0	0	0	0	0	0	0	0	0	0	0	0	0	0	0	0	0	0	0	0	0	0	0	0	0	0	0	0	0	0	0	0	0	0	0	0	0
4307839	0	0	0	0	0	0	0	0	0	0	0	0	0	0	0	0	0	0	0	0	0	0	0	0	0	3	0	0	0	0	0	0	3	0	3	0	0	0	0	0	0	0	0	0	0	0	0	0	0
4480048	0	0	0	0	0	0	0	0	0	0	0	0	0	0	0	0	0	0	0	0	0	0	0	0	0	0	0	0	0	0	0	0	0	0	0	0	0	0	0	0	0	0	0	0	0	0	0	0	0
New.ReferenceOTU390	0	0	0	0	0	0	0	0	0	0	0	0	0	0	0	0	0	0	0	0	0	0	0	0	0	0	0	0	0	0	0	0	0	0	0	0	0	0	0	0	0	0	0	0	0	0	0	0	0
New.CleanUp.ReferenceOTU17832	0	0	0	0	0	0	0	0	0	0	0	0	0	0	0	0	0	0	0	0	0	0	0	0	0	0	0	0	0	0	0	0	0	0	0	0	0	0	0	0	0	0	0	0	0	0	0	0	0
259774	0	0	0	0	0	0	0	0	0	0	0	0	0	0	0	0	0	0	0	0	0	0	0	0	0	0	0	0	0	0	0	0	0	0	0	0	0	0	0	0	0	0	0	0	0	0	0	0	0
542264	0	0	0	0	0	0	0	0	0	0	0	0	0	0	0	0	0	0	0	0	0	0	0	0	0	0	0	0	0	0	0	0	0	0	0	0	0	0	0	0	0	0	0	0	0	0	0	0	0
New.CleanUp.ReferenceOTU313592	0	0	0	0	0	0	0	0	0	0	0	0	0	0	0	0	0	0	0	0	0	0	0	0	0	0	0	0	0	0	0	0	0	0	0	0	0	0	0	0	0	0	0	0	0	0	0	0	0
862489	0	0	0	0	0	0	0	0	0	0	0	0	0	0	0	0	0	0	0	0	0	0	0	0	0	0	0	0	0	0	0	0	0	0	0	0	0	0	0	0	0	0	0	0	0	0	0	0	0
551223	0	0	0	0	0	0	0	0	0	0	0	0	0	0	0	0	0	0	0	0	0	0	0	0	0	0	0	0	0	0	0	0	0	0	0	0	0	0	0	0	0	0	0	0	0	0	0	0	0
2859855	0	0	0	0	0	0	0	0	0	0	0	0	0	0	0	0	0	0	0	0	0	0	0	0	0	0	0	0	0	0	0	0	0	0	0	0	0	0	0	0	0	0	0	0	0	0	0	0	0
New.CleanUp.ReferenceOTU186142	0	0	0	0	0	0	0	0	0	0	0	0	0	0	0	8	0	10	0	0	0	0	0	16	7	0	0	0	0	4	0	0	0	12	0	0	0	0	4	0	0	0	0	5	0	0	3	13	0
New.CleanUp.ReferenceOTU334619	0	0	0	0	0	0	0	0	0	0	0	0	0	0	0	0	0	0	0	0	0	0	0	0	0	0	0	0	0	0	0	0	0	0	0	0	0	0	0	0	0	0	0	0	0	0	0	0	0
New.CleanUp.ReferenceOTU245077	0	0	0	0	0	57	0	0	0	3	0	0	0	0	0	0	0	0	0	0	0	0	0	0	0	0	0	0	0	0	0	22	0	0	0	0	0	0	0	0	0	0	0	0	0	0	0	0	0
New.CleanUp.ReferenceOTU3353	0	0	0	0	0	0	0	0	0	0	0	0	0	0	0	0	0	0	0	0	0	0	0	0	0	0	0	0	0	0	0	0	0	0	0	0	0	0	0	0	0	0	0	0	0	0	0	0	0
4316327	0	0	0	0	0	0	0	0	0	0	0	0	0	0	0	0	0	0	0	0	0	0	0	0	0	0	0	0	0	0	0	0	0	0	0	0	0	0	0	0	0	0	0	0	0	0	0	0	0
New.ReferenceOTU1013	0	0	0	0	0	0	0	0	0	0	0	0	0	0	0	0	0	0	0	0	0	0	0	0	0	0	0	0	0	0	0	0	0	0	0	0	0	0	0	0	0	0	0	0	0	0	0	0	0
New.CleanUp.ReferenceOTU111849	0	0	0	0	0	0	0	0	0	0	0	0	0	0	0	0	0	0	0	0	0	0	0	0	0	0	0	0	0	0	0	0	0	0	0	0	0	0	0	0	0	0	0	0	0	0	0	0	0
843029	0	0	0	0	0	0	0	0	0	0	0	0	0	0	0	0	0	0	0	0	0	0	0	0	0	0	0	0	0	0	0	0	0	0	0	0	0	0	0	0	0	0	0	0	0	0	0	0	0
4330792	0	0	0	0	0	0	0	0	0	0	0	0	0	0	0	0	0	0	0	0	0	0	0	0	0	0	0	0	0	0	0	0	0	0	0	0	0	0	0	0	0	0	0	0	0	0	0	0	0
533542	0	0	0	0	0	0	0	0	0	0	0	0	0	0	0	0	0	0	0	0	0	0	0	0	0	0	0	0	0	0	0	0	0	0	0	0	0	0	0	0	0	0	0	0	0	0	0	0	0
662682	0	0	0	0	0	0	0	0	0	0	0	0	0	0	0	0	0	0	0	0	0	0	0	0	0	0	0	0	0	0	0	0	0	0	0	0	0	0	0	0	0	0	0	0	0	0	0	0	0
New.CleanUp.ReferenceOTU348389	0	0	0	0	0	0	0	0	0	0	0	0	0	0	0	0	0	0	0	0	0	0	0	0	0	0	0	0	0	0	0	0	0	0	0	0	0	0	0	0	0	0	0	0	0	0	0	0	0
267819	0	0	0	0	0	0	0	0	0	0	0	0	0	0	0	0	0	0	0	0	0	0	0	0	0	0	0	0	0	0	0	0	0	0	0	0	0	0	0	0	0	0	0	0	0	0	0	0	0
New.ReferenceOTU151	0	0	0	0	0	0	0	0	0	0	0	0	0	0	0	0	0	0	0	0	0	0	0	0	0	0	0	0	0	0	0	35	0	0	0	0	0	0	0	0	0	0	0	0	0	0	0	11	4
New.CleanUp.ReferenceOTU231050	0	0	0	0	0	0	0	0	0	0	0	0	0	0	0	0	0	0	0	0	0	0	0	0	0	0	0	0	0	0	0	0	0	0	0	0	0	0	0	0	0	0	0	0	0	0	0	0	0
New.CleanUp.ReferenceOTU168625	0	0	0	0	0	0	0	0	0	0	0	0	0	0	0	0	0	0	0	0	0	0	0	0	0	0	0	0	0	0	0	0	0	0	0	0	0	0	0	0	0	0	0	0	0	0	0	0	0
New.CleanUp.ReferenceOTU42017	0	0	0	0	0	0	0	0	0	0	0	0	0	0	0	0	0	0	0	0	0	0	0	0	0	0	0	0	0	0	0	0	0	0	0	0	0	0	0	0	0	0	0	0	0	0	0	0	0
4434709	0	0	0	0	0	0	0	0	0	0	0	0	0	0	0	0	0	0	0	0	0	0	0	0	0	0	0	0	0	0	0	0	8	0	0	0	0	0	0	0	0	0	0	0	0	0	0	0	0
936914	0	0	0	0	0	0	0	0	0	0	0	0	0	0	0	0	0	0	0	0	0	0	0	0	0	0	0	0	0	0	0	0	0	0	0	0	0	0	0	0	0	0	0	0	0	0	0	0	0
254279	0	0	0	0	0	0	0	0	0	0	0	0	0	0	0	0	0	0	0	0	0	0	0	0	0	0	0	0	0	0	0	0	0	0	0	0	0	0	0	0	0	0	0	0	0	0	0	0	0
1730641	0	0	0	0	0	0	0	0	0	0	0	0	0	0	0	0	0	0	0	0	0	0	0	0	0	0	0	0	0	0	0	0	21	0	0	0	0	0	0	0	0	0	0	0	0	0	0	0	0
New.ReferenceOTU1118	0	0	0	0	0	0	0	0	0	0	0	0	0	0	0	0	0	0	0	0	0	0	0	0	0	0	0	0	0	0	0	0	197	0	0	0	0	0	0	0	5	0	0	0	0	0	0	13	0
843811	0	0	0	0	0	0	0	0	0	0	0	0	0	0	0	0	0	0	0	0	0	0	0	0	0	0	0	0	0	0	0	0	0	0	0	0	0	0	0	0	0	0	0	0	0	0	0	0	0
818146	0	0	0	0	0	0	0	0	0	0	0	0	0	0	0	0	0	0	0	0	0	0	0	0	0	0	0	0	0	0	0	0	0	0	0	0	0	0	0	0	0	0	0	0	0	0	0	0	0
New.CleanUp.ReferenceOTU50188	0	0	0	0	0	0	0	0	0	0	0	0	0	0	0	0	0	0	0	0	0	0	0	0	0	0	0	0	0	0	0	0	0	0	0	0	0	0	0	0	0	0	0	0	0	0	0	0	0
50466	0	0	0	0	0	0	0	0	0	0	0	0	0	0	0	0	0	0	0	0	0	0	0	0	0	0	0	0	0	0	0	0	0	0	0	0	0	0	0	0	0	0	0	0	0	0	0	0	0
1106545	0	0	0	0	0	0	0	0	0	0	0	0	0	0	0	0	0	0	0	0	0	0	0	0	0	0	0	0	0	0	0	0	0	0	0	0	0	0	0	0	0	0	0	0	0	0	0	0	0
New.ReferenceOTU889	0	0	0	0	0	0	0	0	0	0	0	0	0	0	0	0	0	0	0	0	0	0	0	0	0	0	0	0	0	0	0	0	0	0	0	0	0	0	0	0	0	0	0	0	0	0	0	0	0
New.CleanUp.ReferenceOTU42858	0	0	0	0	0	0	0	0	0	0	0	0	0	0	0	0	0	0	0	0	0	0	0	0	0	0	0	0	0	0	0	0	0	0	0	0	0	0	0	0	0	0	0	0	0	0	0	0	0
111046	0	0	0	0	0	0	0	0	0	0	0	0	0	0	0	0	0	0	0	0	0	0	0	0	0	0	0	0	0	0	0	0	5	0	0	0	0	0	0	0	0	0	0	0	0	0	0	3	0
668527	0	0	0	0	0	0	0	0	0	0	0	0	0	0	0	0	0	0	0	0	0	0	0	0	0	0	0	0	0	0	0	0	0	0	0	0	0	3	0	40	0	0	0	0	0	0	0	0	0
New.CleanUp.ReferenceOTU313773	0	0	0	0	0	0	0	0	0	0	0	0	0	0	0	0	0	0	0	0	0	0	0	0	0	0	0	0	0	0	0	0	8	0	0	0	0	0	0	0	0	0	0	0	0	0	0	0	0
377546	0	0	0	0	0	0	0	0	0	0	0	0	0	0	0	0	0	0	0	0	0	0	0	0	0	0	0	0	0	0	0	0	0	0	0	0	0	0	0	0	0	0	0	0	0	0	0	0	0
288283	0	0	0	0	0	0	0	0	0	0	0	0	0	0	0	0	0	0	0	0	0	0	0	0	0	0	0	0	0	0	0	0	0	0	0	0	0	0	0	0	0	0	0	0	0	0	0	0	0
227434	0	0	0	0	0	0	0	0	0	0	0	0	0	0	0	0	0	0	0	0	0	0	0	0	0	0	0	0	0	0	0	0	0	0	0	0	0	0	0	0	0	0	0	0	0	0	0	0	0
866365	0	0	0	0	0	0	0	0	0	0	0	0	0	0	0	0	0	0	0	0	0	0	0	0	0	0	0	0	0	0	0	0	0	0	0	0	0	0	0	0	0	0	0	0	0	0	0	0	0
509047	0	0	0	0	0	0	0	0	0	0	0	0	0	0	0	0	0	0	0	0	0	0	0	0	0	0	0	0	0	0	0	0	0	0	0	0	0	0	0	0	0	0	0	0	0	0	0	0	0
268353	0	0	0	0	0	0	0	0	0	0	0	0	0	0	0	0	0	0	0	0	0	0	0	0	0	0	0	0	0	0	0	0	0	0	0	0	0	0	0	0	0	0	0	0	0	0	0	0	0
545476	0	0	0	0	0	0	0	0	0	0	0	0	0	0	0	0	0	0	0	0	0	0	0	0	0	0	0	0	0	0	0	0	0	0	0	0	0	0	0	0	0	0	0	0	0	0	0	0	0
New.ReferenceOTU666	0	16	0	0	75	0	0	5	0	72	0	18	3	154	0	0	4	3	191	897	0	23	267	0	99	0	0	0	27	24	6	0	0	273	0	0	0	517	0	0	0	0	0	0	0	0	71	0	4
241615	0	0	0	0	0	0	0	3	32	0	0	0	0	0	0	27	0	26	0	0	312	0	0	0	0	0	0	0	0	13	48	0	0	20	0	0	0	0	0	0	0	0	0	10	0	0	0	0	0
New.CleanUp.ReferenceOTU150321	0	0	0	0	0	0	0	0	0	0	0	0	0	0	0	0	0	0	0	0	0	0	0	0	0	0	0	0	0	0	0	0	0	0	0	0	0	0	0	0	0	0	0	0	0	0	0	0	0
New.CleanUp.ReferenceOTU135331	0	0	0	0	0	0	0	0	24	6	0	0	3	0	0	41	0	5	481	0	161	3	0	0	0	0	0	201	0	3	15	0	5	0	0	0	3	0	0	0	0	4	0	0	0	0	0	50	3
New.CleanUp.ReferenceOTU158362	0	0	0	0	0	0	0	0	0	3	0	0	0	0	0	0	0	3	0	0	0	0	0	0	0	0	0	108	0	0	0	0	42	0	0	0	0	0	0	0	3	0	0	0	0	0	0	0	0
816760	0	0	0	0	0	0	0	0	0	0	0	0	0	0	0	0	0	0	0	0	0	0	0	0	0	0	0	0	0	0	0	0	0	0	0	0	0	0	0	0	0	0	0	0	0	0	0	0	0
New.CleanUp.ReferenceOTU124344	0	0	0	0	0	0	0	0	0	0	0	0	0	13	0	0	0	0	0	0	0	0	0	0	10	0	0	0	0	0	0	10	0	0	0	0	0	0	0	0	0	0	0	0	0	0	0	0	0
525648	0	0	0	0	0	0	0	0	0	12	0	3	3	0	0	0	3	8	0	0	0	0	0	0	7	0	0	195	12	0	0	61	152	0	4	4	0	0	0	0	5	7	0	0	9	0	0	28	0
New.ReferenceOTU971	0	0	0	0	0	0	0	0	0	0	0	0	0	0	0	0	0	0	0	0	0	0	0	0	0	0	0	0	0	0	0	0	0	0	0	0	0	0	0	0	0	0	0	0	0	0	0	0	0
540718	0	0	0	0	0	0	0	0	0	0	0	0	0	0	0	0	0	0	0	0	0	0	0	0	0	0	0	0	0	0	0	0	0	0	0	0	0	0	0	0	0	0	0	0	0	0	0	0	0
589983	0	0	0	0	0	0	0	0	0	0	0	0	0	0	0	0	0	0	0	0	0	0	0	0	0	0	0	3	0	0	0	0	0	0	0	0	0	0	0	0	0	0	0	0	0	0	0	0	0
588630	0	0	0	0	0	0	0	0	0	0	0	0	0	0	0	0	0	0	0	0	0	0	0	0	0	0	0	0	0	0	0	0	0	0	0	0	0	0	0	0	0	0	0	0	0	0	0	0	0
New.ReferenceOTU252	0	0	0	0	0	0	0	0	0	0	0	0	0	0	0	0	0	0	0	0	0	0	0	0	0	0	0	0	0	0	0	0	0	0	0	0	0	0	0	0	0	0	0	0	0	0	0	0	0
1025949	0	3	0	0	0	0	66	25	0	3	13	0	0	2017	232	7	0	5	0	7	0	9	3	119	155	0	47	87	6	23	52	93	25	339	7	4	3	0	0	0	3	3	0	25	0	0	23	38	0
291770	0	9	0	0	0	0	7	0	0	7	0	0	16	90	0	11	0	10	0	0	372	0	4	22	36	0	12	739	5	0	19	436	57	9	31	27	12	3	0	0	5	8	938	0	23	300	7	136	5
New.ReferenceOTU587	0	0	0	0	0	0	0	0	0	0	0	0	0	0	0	0	0	0	0	0	0	0	0	0	0	0	0	0	0	0	0	0	0	0	0	0	0	0	0	0	0	0	0	0	0	0	0	0	0
737645	0	0	0	0	0	0	0	0	0	0	0	0	0	0	0	0	0	0	0	0	0	0	0	0	0	0	0	0	0	0	0	0	0	0	0	0	0	0	0	0	0	0	0	0	0	0	0	0	0
3611183	0	0	0	0	0	0	0	0	0	0	0	0	0	0	0	0	0	0	0	0	0	0	0	0	0	0	0	0	0	0	0	0	0	0	0	0	0	0	0	0	0	0	0	0	0	0	0	0	0
New.ReferenceOTU396	0	0	0	0	0	0	0	0	0	0	0	0	0	0	0	0	0	0	0	0	0	0	0	0	0	0	0	0	0	0	0	0	0	0	0	0	0	0	0	0	0	0	0	0	0	0	0	0	0
826904	0	0	0	0	0	0	0	0	0	0	0	0	0	0	0	3	3	0	0	0	0	0	0	0	0	0	0	65	0	3	0	10	23	8	0	0	0	0	0	0	5	5	0	0	0	0	4	10	3
828431	0	0	0	0	0	0	0	0	0	9	0	0	0	0	0	0	0	0	0	0	0	0	0	0	0	0	0	0	0	0	0	11	8	0	0	0	0	0	0	0	4	5	0	0	6	0	0	19	0
618303	0	0	0	0	0	0	0	0	0	0	0	0	0	0	0	0	0	0	0	0	0	0	0	0	0	0	0	0	0	0	0	0	0	0	0	0	0	0	0	0	0	0	0	0	0	0	0	0	0
1139344	0	4	0	0	0	0	0	0	0	0	0	0	0	0	0	0	0	0	0	0	0	0	0	0	0	0	0	94	5	0	0	25	53	0	3	0	0	0	0	0	5	0	0	0	3	0	0	9	0
582075	0	0	0	0	0	0	0	0	0	0	0	0	0	0	0	0	0	0	0	0	0	0	0	0	0	0	0	13	0	0	0	0	0	0	0	0	0	0	0	0	0	0	0	0	0	0	0	0	0
New.ReferenceOTU75	0	0	0	0	0	0	0	0	0	0	0	0	0	0	0	0	0	0	0	0	0	0	0	0	0	0	0	0	0	0	0	0	0	0	0	0	0	0	0	0	0	0	0	0	0	0	0	0	0
364780	0	0	0	0	0	0	0	0	0	0	0	0	0	0	0	0	0	0	0	0	0	0	0	0	0	0	0	55	0	0	0	3	0	0	0	0	0	0	0	0	0	0	0	0	0	0	0	6	0
863942	0	0	0	0	0	0	0	0	0	0	0	0	0	0	0	0	0	0	0	0	0	0	0	0	0	0	0	0	0	0	0	0	0	0	0	0	0	0	0	0	0	0	0	0	0	0	0	0	0
4357887	0	0	0	0	0	0	0	0	0	0	0	0	0	0	0	0	0	0	0	0	0	0	0	0	0	0	0	0	0	0	0	0	0	0	0	0	0	0	0	0	0	0	0	0	0	0	0	0	0
224759	0	6	0	0	0	0	0	0	0	0	0	0	0	0	0	0	0	0	0	0	0	0	3	0	0	0	0	0	0	0	0	13	6	0	0	0	0	0	0	0	0	0	0	0	0	0	0	3	0
750263	0	0	0	0	0	0	0	0	0	0	0	0	0	0	0	0	0	0	0	0	0	0	0	0	0	0	0	7	0	0	0	0	0	0	0	0	0	0	0	0	0	0	0	0	0	0	0	0	0
4715	0	0	0	0	0	0	0	0	0	0	0	0	0	0	0	0	0	0	0	0	0	0	0	0	0	0	0	0	0	0	0	0	0	0	0	0	0	0	0	0	0	0	0	0	0	0	0	0	0
New.CleanUp.ReferenceOTU234053	0	0	0	0	0	0	0	0	0	0	0	0	0	0	0	0	0	0	0	0	0	0	0	0	0	0	0	0	0	0	0	0	0	0	0	0	0	0	0	0	0	0	0	0	0	0	0	0	0
New.CleanUp.ReferenceOTU103123	0	0	0	0	0	0	0	0	0	0	0	0	0	0	0	0	0	0	0	0	0	0	0	0	0	0	0	0	0	0	0	0	0	0	0	0	0	0	0	0	0	0	0	0	0	0	0	0	0
New.ReferenceOTU1160	0	0	0	0	0	0	0	0	0	0	0	0	0	0	0	0	0	0	0	0	0	0	0	0	0	0	0	0	0	0	0	0	0	0	0	0	0	0	0	0	0	0	0	0	0	0	0	0	0
New.CleanUp.ReferenceOTU114235	0	0	0	0	0	0	0	0	0	0	0	0	0	0	0	0	0	0	0	0	0	0	0	0	0	0	0	0	0	0	0	0	0	0	0	0	0	0	0	0	0	0	0	0	0	0	0	0	0
New.CleanUp.ReferenceOTU268306	0	0	0	0	0	0	0	0	0	0	0	0	0	0	0	0	0	0	0	0	0	0	0	0	0	3	0	0	0	0	0	0	65	0	0	0	0	0	0	0	0	0	0	0	0	0	0	0	0
New.ReferenceOTU311	0	0	0	0	0	0	0	0	0	0	0	0	0	0	0	0	0	0	0	0	0	0	0	0	0	0	0	0	0	0	0	0	0	0	0	0	0	0	0	0	0	0	0	0	0	0	0	0	0
792078	0	0	0	0	0	0	0	0	0	0	0	0	0	0	0	0	0	0	0	0	0	0	0	0	0	0	0	0	0	0	0	0	0	0	0	0	0	0	0	0	0	0	0	0	0	0	0	0	0
1119292	0	0	0	0	0	0	0	0	0	0	0	0	0	0	0	0	0	0	0	0	0	0	0	0	0	0	0	0	0	0	0	0	0	0	0	0	0	0	0	0	0	0	0	0	0	0	0	0	0
537664	0	0	0	0	0	0	0	0	0	0	0	0	0	0	0	0	0	0	0	0	0	0	0	0	0	0	0	0	0	0	0	0	0	0	0	0	0	0	0	0	0	0	0	0	0	0	0	0	0
767403	0	0	0	0	0	0	0	0	0	0	0	0	0	0	0	0	0	0	0	0	0	0	0	0	0	0	0	0	0	0	0	0	3	0	0	0	0	0	0	0	0	0	0	0	0	0	0	0	0
New.CleanUp.ReferenceOTU11122	0	0	0	0	0	0	0	0	0	0	0	0	0	0	0	0	0	0	0	0	0	0	0	0	0	0	0	0	0	0	0	0	13	0	0	0	0	0	0	0	0	0	0	0	0	0	0	0	0
New.CleanUp.ReferenceOTU236639	0	0	0	0	0	0	0	0	0	0	0	0	0	0	0	0	0	0	0	0	0	0	0	0	0	0	0	0	0	0	0	0	0	0	0	0	0	0	0	0	0	0	0	0	0	0	0	0	0
349639	0	0	0	0	0	0	0	0	0	0	0	0	0	0	0	0	0	0	0	0	0	0	0	0	0	0	0	0	0	0	0	0	0	0	0	0	0	0	0	0	0	0	0	0	0	0	0	0	0
548842	0	0	0	0	0	0	0	0	0	0	0	0	0	0	0	0	0	0	0	0	0	0	0	0	0	0	0	0	0	0	0	0	0	0	0	0	0	0	0	0	0	0	0	0	0	0	0	0	0
560101	0	0	0	0	0	0	0	0	0	0	0	0	0	0	0	0	0	0	0	0	0	0	0	0	0	0	0	0	0	0	0	0	0	0	0	0	0	0	0	0	0	0	0	0	0	0	0	0	0
311640	0	0	0	0	0	0	0	0	0	0	0	0	0	0	0	0	0	0	0	0	0	0	0	0	0	0	0	0	0	0	0	0	0	0	0	0	0	0	0	0	0	0	0	0	0	0	0	0	0
New.ReferenceOTU648	0	0	0	0	0	0	6	0	0	0	0	0	0	92	0	0	0	0	0	0	0	3	0	0	9	0	6	5	0	0	9	0	4	12	0	0	0	0	0	0	0	0	0	0	0	0	3	0	0
4437901	0	0	0	0	0	0	0	0	0	0	0	0	0	0	0	0	0	0	0	0	0	0	0	0	0	0	0	0	0	0	0	0	0	0	0	0	0	0	0	0	0	0	0	0	0	0	0	0	0
New.ReferenceOTU606	0	0	0	0	0	0	0	0	0	0	0	0	0	0	0	0	0	0	0	0	0	0	0	0	0	0	0	0	0	0	0	0	0	0	0	0	0	0	0	0	0	0	0	0	0	0	0	0	0
New.CleanUp.ReferenceOTU332786	0	0	0	0	0	0	0	0	0	0	0	0	0	0	0	0	0	0	0	0	0	0	0	0	0	0	0	0	0	0	0	0	0	0	0	0	0	0	0	0	0	0	0	0	0	0	0	0	0
New.CleanUp.ReferenceOTU335143	0	0	0	0	0	0	0	0	0	0	0	0	0	0	0	0	0	0	0	0	0	0	0	0	0	0	0	0	0	0	0	0	0	0	0	0	0	0	0	0	0	0	0	0	0	0	0	0	0
537944	0	0	0	0	0	0	0	0	0	0	0	0	0	0	0	0	0	0	0	0	0	0	0	0	0	0	0	0	0	0	0	0	0	0	0	0	0	0	0	0	0	0	0	0	0	0	0	0	0
New.ReferenceOTU965	0	0	0	0	0	0	0	0	0	0	0	0	0	0	0	0	0	0	0	0	0	0	0	0	0	0	0	0	0	0	0	0	0	0	0	0	0	0	0	0	0	0	0	0	0	0	0	0	0
173252	0	0	0	0	0	0	0	0	0	0	0	0	0	0	0	0	0	0	0	0	0	0	0	0	0	0	0	0	0	0	0	0	0	0	0	0	0	0	0	0	0	0	0	0	0	0	0	0	0
812978	0	0	0	0	0	0	0	0	0	0	0	0	0	0	0	0	0	0	0	0	0	0	0	0	0	0	0	0	0	0	0	0	0	0	0	0	0	0	0	0	0	0	0	0	0	0	0	0	0
828311	0	3	0	0	0	0	0	0	0	0	0	0	0	0	0	0	0	0	0	0	0	0	0	0	0	0	0	0	0	0	0	0	0	0	0	0	0	0	0	0	0	0	0	0	0	0	0	0	0
New.CleanUp.ReferenceOTU329172	0	0	0	0	0	0	0	0	0	0	0	0	0	0	0	0	0	0	0	0	0	0	0	0	0	0	0	0	0	0	0	0	0	0	0	0	0	0	0	0	0	0	0	0	0	0	0	0	0
New.CleanUp.ReferenceOTU350706	0	0	0	0	0	0	0	0	0	0	0	0	0	0	0	0	0	0	0	0	0	0	0	0	0	0	0	0	0	0	0	0	0	0	0	0	0	0	0	0	0	0	0	0	0	0	0	0	0
New.CleanUp.ReferenceOTU31225	0	0	0	0	0	0	0	0	0	0	0	0	0	0	0	0	0	0	0	0	0	0	0	0	0	0	0	0	0	0	0	0	0	0	0	0	0	0	0	0	0	0	0	0	0	0	0	0	0
New.ReferenceOTU962	0	0	0	0	0	0	0	0	0	0	0	0	0	0	0	0	0	0	0	0	0	0	0	0	0	0	0	0	0	0	0	0	0	0	0	0	0	0	0	0	0	0	0	0	0	0	0	0	0
New.CleanUp.ReferenceOTU58047	0	0	0	0	0	0	0	0	0	0	0	0	0	0	0	0	0	0	0	0	0	0	0	0	0	0	0	0	0	0	0	0	0	0	0	0	0	0	0	0	0	0	0	0	0	0	0	0	0
New.CleanUp.ReferenceOTU234852	0	0	0	0	0	0	0	0	0	0	0	0	0	0	0	0	0	0	0	0	0	0	0	0	0	0	0	0	0	0	0	0	0	0	0	0	0	0	0	0	0	0	0	0	0	0	0	0	0
[truncated: 1,640 more rows]
[truncated: 226 more columns]

## Sheet: Table_S4
BLASTN results of the seven core OTUs (shared by >90% of the specimens)
OTU.ID	Best BLASTN Hit (AccNo)	Assigned taxonomy	Identity	Source
837283	MG589498	Plesiomonas shigelloides	1	soil
555945	KT973365	NA	1	endolithic microbial communities from marine intertidal outcrops (Isla de Mona, Puerto Rico)
828483	GU293234	NA	1	stomach mucus of Pelteobagrus fulvidraco (fish)
712677	MG803819	NA	1	sewage sludge
828162	LC411744	NA	1	Oreochromis mossambicus (fish)
297672	GU074075	Cetobacterium sp.	0.99	freshwater, lake
839235	MK245984	Aeromonas sp.	1	Advance fry of Ctenopharyngodon idella (fish)

## Sheet: Table_S5
DISCRIMINATORY TAXA/OTUs
(ind ≥ 0.70, p ≤ 0.01)
BETWEEN CONTINENTS
	Africa	America
Phylum
Actinobacteria	0.703398	0.101813
Bacteroidetes	0.122629	0.820378
Order
Acidimicrobiales	0.728164	0.0389829
Rhodobacterales	0.796593	0.0576084
Enterobacteriales	0.187829	0.714751
Erysipelotrichales	0.000171803	0.77913
Vibrionales	0.13913	0.81858
Bacteroidales	0.0697429	0.82838
Family
Bacteroidaceae	0.0764976	0.799331
Enterobacteriaceae	0.187829	0.714751
Erysipelotrichaceae	0.000171803	0.77913
Lachnospiraceae	0.0882262	0.824774
Peptococcaceae	0.0017351	0.725239
Porphyromonadaceae	0.0319895	0.838268
Pseudoalteromonadaceae	0.0614163	0.821574
Rhodobacteraceae	0.796593	0.0576084
Genus
Epulopiscium	0.0783748	0.835035
Porphyromonas	0.0330575	0.829438
Rhodobacter	0.733419	0.0299678
Vibrio	0.00223017	0.760258
rc4-4	0.0017351	0.725239
OTUs	Africa	America	Phylum	Class	Order	Family	Genus
566213	0.0307923	0.878176	Firmicutes	Clostridia	Clostridiales	Lachnospiraceae
815369	0.00455519	0.867408	Firmicutes	Clostridia	Clostridiales	Lachnospiraceae
344394	0.00465608	0.856516	Firmicutes	Clostridia	Clostridiales	Clostridiaceae
837068	0.00680151	0.852993	Proteobacteria	Gammaproteobacteria	Aeromonadales	Aeromonadaceae
288718	0.0129586	0.850321	Firmicutes	Clostridia	Clostridiales	Lachnospiraceae
New.ReferenceOTU1138	0.0335799	0.827966	Bacteroidetes	Bacteroidia	Bacteroidales	Porphyromonadaceae	Porphyromonas
838851	0.062187	0.820225	Proteobacteria	Gammaproteobacteria	Vibrionales	Pseudoalteromonadaceae
582630	0.0611975	0.806899	Firmicutes	Clostridia	Clostridiales	Clostridiaceae
252268	0.0604964	0.800317	Planctomycetes	Planctomycetia	Pirellulales	Pirellulaceae
New.ReferenceOTU924	0.0259773	0.774105	Proteobacteria	Gammaproteobacteria	Vibrionales	Pseudoalteromonadaceae
539852	0.123147	0.770044	Proteobacteria	Betaproteobacteria	Neisseriales	Neisseriaceae
509989	0.0978631	0.7577	Bacteroidetes	Bacteroidia	Bacteroidales	Bacteroidaceae
554250	0.0136244	0.747034	Bacteroidetes	Bacteroidia	Bacteroidales	Porphyromonadaceae	Porphyromonas
4452634	0.0278295	0.742034	Firmicutes	Clostridia	Clostridiales	Clostridiaceae	Clostridium
New.ReferenceOTU135	0.0017351	0.725239	Firmicutes	Clostridia	Clostridiales	Peptococcaceae	rc4-4
843459	0.163339	0.72472	Firmicutes	Clostridia	Clostridiales	Clostridiaceae
837574	0.0194303	0.716357	Proteobacteria	Gammaproteobacteria	Aeromonadales	Aeromonadaceae
WITHIN MIDAS
Between large and crater lakes
	Large	Crater
Order
Phycisphaerales	0.0228715	0.712389
Vibrionales	0.156648	0.806084
Family
Pseudoalteromonadaceae	0.100937	0.849039
Genus
Plesiomonas	0.810626	0.154021
Vibrio	0.0105747	0.923824
Species
Plesiomonas shigelloides	0.810626	0.154021
OTUs			Phylum	Class	Order	Family	Genus	Species
811414	0	0.700855	Proteobacteria	Gammaproteobacteria	Alteromonadales	Shewanellaceae	Shewanella
New.CleanUp.ReferenceOTU156186	0.0335782	0.815879	Proteobacteria	Gammaproteobacteria	Vibrionales	Pseudoalteromonadaceae
4393352	0.036293	0.746797	Proteobacteria	Gammaproteobacteria	Vibrionales	Pseudoalteromonadaceae
1767788	0.0419785	0.78499	Proteobacteria	Gammaproteobacteria	Vibrionales	Pseudoalteromonadaceae	Vibrio
New.ReferenceOTU924	0.0664102	0.831958	Proteobacteria	Gammaproteobacteria	Vibrionales	Pseudoalteromonadaceae
838851	0.101306	0.848518	Proteobacteria	Gammaproteobacteria	Vibrionales	Pseudoalteromonadaceae
547714	0.122565	0.707066	Firmicutes	Clostridia	Clostridiales	Clostridiaceae
4417972	0.70797	0.041195	Planctomycetes	Planctomycetia	Pirellulales	Pirellulaceae
837283	0.810427	0.15421	Proteobacteria	Gammaproteobacteria	Enterobacteriales	Enterobacteriaceae	Plesiomonas	shigelloides
628299	0.858319	0.0625481	Planctomycetes	Planctomycetia	Pirellulales	Pirellulaceae
By Lake
	Apoyeque	Apoyo	Asososca León	Managua	Masaya	Nicaragua	Xiloá
Order
Methylacidiphilales	0.00271068	0.000406677	0.958037	0.000317716	0.00833658	0.00222271	0.00732925
Planctomycetales	0.833333	0	0	0	0	0	0
Sphingomonadales	0.000264373	0.797149	0.054514	0.00274102	0	0.000960881	0.0240245
Family
Isosphaeraceae	0	0.00234795	0.723306	0.0181839	0.00292973	0.0628185	0.00144678
LD19	0.00271068	0.000406677	0.958037	0.000317716	0.00833658	0.00222271	0.00732925
Planctomycetaceae	0.833333	0	0	0	0	0	0
Sphingomonadaceae	0.000405714	0.779575	0.0560029	0.000350537	0	0.00147459	0.0254358
Genus
Morganella	0	0	0	0	0.785714	0	0
Planctomyces	0.833333	0	0	0	0	0	0
Species
Morganella morganii	0	0	0	0	0.785714	0	0
OTUs								Phylum	Class	Order	Family	Genus	Species
New.ReferenceOTU74	0	0	0	0	0	0.740741	0	Planctomycetes	Planctomycetia	Pirellulales	Pirellulaceae
563900	0.0261217	0	0	0	0	0	0.702198	Proteobacteria	Gammaproteobacteria	Vibrionales	Pseudoalteromonadaceae
578606	0.0288757	0	0	0	0	0	0.791141	Proteobacteria	Gammaproteobacteria	Vibrionales	Pseudoalteromonadaceae
558848	0	0	0	0	0.762129	0.0531173	1.26013e-05	Proteobacteria	Betaproteobacteria	Neisseriales	Neisseriaceae
233981	0	0	0	0	0.785714	0	0	Proteobacteria	Gammaproteobacteria	Enterobacteriales	Enterobacteriaceae	Morganella	morganii
537290	0	0	0	0	0.857087	2.42077e-06	0	Proteobacteria	Gammaproteobacteria	Enterobacteriales	Enterobacteriaceae
New.ReferenceOTU705	0	0	0	0.770592	0.143786	0	0	Tenericutes	CK-1C4-19
4378109	0	0	0	0.788965	0.00591187	0	0	Tenericutes	CK-1C4-19
685193	0	0.00234795	0.723306	0.0181839	0.00292973	0.0628185	0.00144678	Planctomycetes	Planctomycetia	Gemmatales	Isosphaeraceae
252268	0.039901	0.0279005	0.734667	0.098406	0.0132699	0.0306734	0.032672	Planctomycetes	Planctomycetia	Pirellulales	Pirellulaceae
New.ReferenceOTU368	0	0	0.779794	0	0.109169	8.84073e-05	0	Planctomycetes	Phycisphaerae	Phycisphaerales
New.ReferenceOTU120	0.0269533	0.00263456	0.828171	0	0	0	0	Planctomycetes	Planctomycetia	Pirellulales	Pirellulaceae
850577	0.00271068	0.000406677	0.958037	0.000317716	0.00833658	0.00222271	0.00732925	Verrucomicrobia	[Methylacidiphilae]	Methylacidiphilales	LD19
New.ReferenceOTU825	0	0	0.996905	0	0	0	0.000294714	Verrucomicrobia	[Spartobacteria]	[Chthoniobacterales]	[Chthoniobacteraceae]	Candidatus Xiphinematobacter
New.ReferenceOTU169	0	0	0.998481	0	0	0	3.61593e-05	Verrucomicrobia	[Spartobacteria]	[Chthoniobacterales]	[Chthoniobacteraceae]
257302	0.000461292	0.768545	0.0636747	0.000265704	0	0.0016766	0.0240399	Proteobacteria	Alphaproteobacteria	Sphingomonadales	Sphingomonadaceae
1108289	0.708333	0	0	0	0	0	0	Proteobacteria	Alphaproteobacteria	Rhodobacterales	Rhodobacteraceae	Rhodobacter
346019	0.708333	0	0	0	0	0	0	Proteobacteria	Betaproteobacteria	Burkholderiales	Alcaligenaceae
New.ReferenceOTU730	0.708333	0	0	0	0	0	0	Planctomycetes	Planctomycetia	Pirellulales	Pirellulaceae
New.ReferenceOTU1191	0.727717	0	0.0265743	0.000935636	0	0	5.30406e-05	Proteobacteria	Alphaproteobacteria	Rhizobiales	Phyllobacteriaceae
New.ReferenceOTU725	0.731299	0.000174602	0	0	0.00445414	0.00239509	0.0051965	Bacteroidetes	Bacteroidia	Bacteroidales	Bacteroidaceae
New.ReferenceOTU867	0.791667	0	0	0	0	0	0	Planctomycetes	Planctomycetia	Pirellulales	Pirellulaceae
New.ReferenceOTU840	0.817324	0.0271687	0.0422544	0.000658156	0	0	0.000522346	Proteobacteria	Alphaproteobacteria	Rhizobiales	Phyllobacteriaceae
4330793	0.833333	0	0	0	0	0	0	Planctomycetes	Planctomycetia	Planctomycetales	Planctomycetaceae	Planctomyces
New.ReferenceOTU417	0.877297	0.00187954	0	0	0.0206901	0.00390607	0.0097897	Bacteroidetes	Bacteroidia	Bacteroidales	Bacteroidaceae

## Sheet: Table_S6
PERMANOVA results
All lakes									Abbreviations
Source	df	SS	MS	Pseudo-F	P(perm)	perms			Co: Continent
Co	1	1.9795	1.9795	13.119	0.001	996			La: Lake
La(Co)	7	8.212	1.1731	7.7751	0.001	996			Sp: Species
Sp(La(Co))	37	14.96	0.40432	2.6796	0.001	995
Res	222	33.497	0.15089
Total	267	63.395
Africa
Source	df	SS	MS	Pseudo-F	P(perm)	perms
La	1	2.7497	2.7497	20.584	0.001	998
Sp(La)	28	12.797	0.45702	3.4211	0.001	997
Res	83	11.088	0.13359
Total	112	27.248
America
Source	df	SS	MS	Pseudo-F	P(perm)	perms
La	6	5.4623	0.91039	5.6471	0.001	996
Sp(La)	9	2.1633	0.24037	1.491	0.001	994
Res	139	22.409	0.16122
Total	154	31.517

## Sheet: Table_S7
TDISCRIMINATORY TAXA/OTUs among species and trophic niches within crater lake Apoyo and Xiloá
(ind ≥ 0.70, p ≤ 0.01)
APOYO
	benthic	limnetic
Family
Bacteroidaceae	0.865564	0.0960255
Porphyromonadaceae	0.825422	0.0997589
Ruminococcaceae	0.927702	0.00409057
Genus
Porphyromonas	0.956962	0.0245931
OTUs			Phylum	Class	Order	Family
290645	0.0241057	0.918041	Firmicutes	Clostridia	Clostridiales	Ruminococcaceae
New.ReferenceOTU457	0.0391762	0.916751	Firmicutes	Clostridia	Clostridiales	Ruminococcaceae
New.ReferenceOTU1168	0.726038	0.00722359	Proteobacteria	Deltaproteobacteria	Syntrophobacterales	Syntrophobacteraceae
	benthic_deep (A. chanco)	benthic_sup (A. astorquii)	limnetic (A. zaliosus)
Order
Actinomycetales	0.773869	0.0150754	0.017229
Family
Ruminococcaceae	0.0232484	0.953631	0.0032847
OTUs				Phylum	Class	Order	Family
290645	0.0241327	0.0186998	0.876535	Firmicutes	Clostridia	Clostridiales	Ruminococcaceae
New.ReferenceOTU457	0.0128802	0.0401439	0.887011	Firmicutes	Clostridia	Clostridiales	Ruminococcaceae
New.ReferenceOTU783	0.717949	0.03663	0.043956	Firmicutes	Clostridia	Clostridiales	Lachnospiraceae
XILOA'
	benthic	limnetic
Class
Clostridia	0.723069	0.276931
Order
Clostridiales	0.723069	0.276931
Rhodobacterales	0.775353	0.169429
Family
Pseudoalteromonadaceae	0.291196	0.708804
	benthic_deep (A. xiolaensis)	benthic_sup (A. amarillo)	limnetic (A. sagittae)
Phylum
Verrucomicrobia	0.767377	0.103167	0.121519
Class
Verrucomicrobiae	0.788938	0.0799413	0.0465938
Order
Chromatiales	0.00794085	0.796354	0.0869729
Rhizobiales	0.0550975	0.704219	0.0721514
Family
Peptostreptococcaceae	0.125188	0.748751	0.126061
Verrucomicrobiaceae	0.788938	0.0799413	0.0465938
Genus
Akkermansia	0.739914	0.0351669	0.0347606
Species
muciniphila	0.739914	0.0351669	0.0347606
